# Supplementary material for: An enhanced framework for local genetic correlation analysis
Source: Research Square preprint supplement (doi:10.21203/rs.3.rs-4568593/v1), 2024-07-02
Supplement: Supplementary file 1 [file b41f99bc9b9ef8ebcd9230a1.xlsx]

## Sheet: HDL-L
Significant regions identified by HDL-L among 30 phenotypes in UK Biobank
Phenotype1	Phenotype2	Phenotype_Description1	Phenotype_Description2	chr	piece	Heritability_1	P_value_Heritability_1	Heritability_2	P_value_Heritability_2	rg	Lower_bound_rg	Upper_bound_rg	P	Pfdr	Ensemble_ID	Gene_name	ID
100005	100150	Carbohydrate	Drinking water intake	1	146	0.000467289	0.0548779	0.000280806	0.0929882	-1	-1	-0.505551	6.93038e-05	0.0383365	ENSG00000150681.5,ENSG00000253148.1	RGS18,RGS21	100005female:100150male:1:146
100005	102	Carbohydrate	Pulse rate, automated reading	17	51	0.000737795	0.00718481	3.12902e-05	0.602995	-1	-1	-0.0885089	0.000101675	0.0389938	ENSG00000130935.5,ENSG00000171634.12,ENSG00000186665.8,ENSG00000182481.4,ENSG00000196704.7,ENSG00000141337.8,ENSG00000108932.7,ENSG00000070540.8,ENSG00000108946.10,ENSG00000108950.7,ENSG00000269657.1	NOL11,BPTF,C17orf58,KPNA2,AMZ2,ARSG,SLC16A6,WIPI1,PRKAR1A,FAM20A,AC079210.1	100005female:102male:17:51
100005	102	Carbohydrate	Pulse rate, automated reading	19	49	0.000515844	0.164617	4.97734e-05	0.267696	-1	-1	-0.470947	0.000283236	0.0467071	ENSG00000257704.2,ENSG00000197405.3,ENSG00000134830.3,ENSG00000134815.14,ENSG00000105419.13,ENSG00000118160.9,ENSG00000118162.9,ENSG00000105402.3,ENSG00000118156.8,ENSG00000063169.6,ENSG00000024422.7,ENSG00000105373.14,ENSG00000178980.10,ENSG00000178928.4,ENSG00000105392.11,ENSG00000259009.3,ENSG00000105398.3,ENSG00000188334.3,ENSG00000169393.4,ENSG00000105507.2	PRR24,C5AR1,C5AR2,DHX34,MEIS3,SLC8A2,KPTN,NAPA,ZNF541,GLTSCR1,EHD2,GLTSCR2,SEPW1,TPRX1,CRX,TPRX2P,SULT2A1,BSPH1,ELSPBP1,CABP5	100005female:102male:19:49
100005	1110	Carbohydrate	Length of mobile phone use	16	26	0.000152825	0.367533	7.37058e-05	0.0192482	-1	-1	-0.0609061	2.90484e-05	0.035163	ENSG00000077235.13,ENSG00000047578.8,ENSG00000169181.8,ENSG00000169180.7,ENSG00000188322.4,ENSG00000198156.6,ENSG00000205609.8,ENSG00000233232.2,ENSG00000261832.1,ENSG00000188603.12,ENSG00000184730.6,ENSG00000197272.2,ENSG00000176046.7,ENSG00000176476.4,ENSG00000197165.6,ENSG00000196502.7,ENSG00000255524.3,ENSG00000184110.10,ENSG00000196993.4,ENSG00000168488.14,ENSG00000178952.4,ENSG00000178188.1…	GTF3C1,KIAA0556,GSG1L,XPO6,SBK1,NPIPB6,EIF3CL,NPIPB7,CLN3,CLN3,APOBR,IL27,NUPR1,CCDC101,SULT1A2,SULT1A1,NPIPB8,EIF3C,NPIPB9,ATXN2L,TUFM,SH2B1,ATP2A1,RABEP2,CD19,NFATC2IP,SPNS1,LAT	100005female:1110male:16:26
100005	1170	Carbohydrate	Getting up in morning	7	117	0.000202714	0.470931	0.000187916	0.00628319	-1	-1	-0.0179018	6.92509e-05	0.0383365	ENSG00000183470.5,ENSG00000106554.7,ENSG00000131558.10	AC009365.3,CHCHD3,EXOC4	100005female:1170male:7:117
100005	1170	Carbohydrate	Getting up in morning	14	5	8.75978e-05	0.772205	0.000129959	0.081113	-1	-1	-0.0117012	1.42444e-05	0.0328404	ENSG00000136367.12,ENSG00000259431.1,ENSG00000213983.7,ENSG00000092051.12,ENSG00000100867.10,ENSG00000197775.1,ENSG00000157326.14,ENSG00000187630.10,ENSG00000186648.10,ENSG00000100884.5,ENSG00000129535.8,ENSG00000100889.7,ENSG00000100897.13,ENSG00000259371.1,ENSG00000139914.6,ENSG00000092010.10,ENSG00000100908.9,ENSG00000100911.9,ENSG00000092098.12,ENSG00000259529.1,ENSG00000213928.4,ENSG00000100…	ZFHX2,THTPA,AP1G2,JPH4,DHRS2,DHRS4-AS1,DHRS4,DHRS4L2,LRRC16B,CPNE6,NRL,PCK2,DCAF11,RP11-468E2.6,FITM1,PSME1,EMC9,PSME2,RNF31,RP11-468E2.4,IRF9,REC8,IPO4,RP11-468E2.2,TM9SF1,TM9SF1,TSSK4,CHMP4A,MDP1,NEDD8-MDP1,NEDD8,GMPR2,TINF2,TGM1,RABGGTA,DHRS1,NOP9,CIDEB,LTB4R2,LTB4R2,LTB4R,ADCY4,RP11-934B9.3,RIPK3,NFATC4,NYNRIN,CBLN3	100005female:1170male:14:5
100005	1210	Carbohydrate	Snoring	17	1	0.00051902	0.255696	2.91365e-05	0.713802	-1	-1	-0.185919	5.03269e-05	0.037033	ENSG00000272636.1,ENSG00000181031.11,ENSG00000187624.7,ENSG00000183688.4,ENSG00000141252.15,ENSG00000167695.10,ENSG00000179409.6,ENSG00000167699.9,ENSG00000171861.6,ENSG00000262003.1	DOC2B,RPH3AL,C17orf97,FAM101B,VPS53,FAM57A,GEMIN4,GLOD4,RNMTL1,RP11-676J12.7	100005female:1210male:17:1
100005	1299	Carbohydrate	Salad / raw vegetable intake	5	18	0.000362414	0.310687	5.10662e-05	0.140035	1	0.276528	1	3.17544e-06	0.0251331			100005female:1299male:5:18
100005	20116_2	Carbohydrate	Smoking status: Current	5	134	0.000486958	0.195678	2.13114e-05	0.695632	1	0.0685069	1	0.000166274	0.0420477	ENSG00000145860.7,ENSG00000164332.6,ENSG00000113302.4,ENSG00000170214.3,ENSG00000113312.6,ENSG00000170234.8	RNF145,UBLCP1,IL12B,ADRA1B,TTC1,PWWP2A	100005female:20116_2male:5:134
100005	2040	Carbohydrate	Risk taking	14	35	0.000457173	0.188567	0.000146142	0.0103367	-1	-1	-0.39674	1.76192e-05	0.0331133	ENSG00000139946.5,ENSG00000070269.9,ENSG00000259133.1,ENSG00000165588.12	PELI2,TMEM260,RP11-1085N6.3,OTX2	100005female:2040male:14:35
100005	20458	Carbohydrate	General happiness	11	87	0.00028116	0.00679917	5.32145e-05	0.493666	-1	-1	-0.0931093	6.12262e-05	0.0378636	ENSG00000214414.5,ENSG00000168930.9,ENSG00000189253.7,ENSG00000223417.4,ENSG00000204449.2,ENSG00000077616.6,ENSG00000110172.7	TRIM77,TRIM49,TRIM64B,TRIM49D1,TRIM49C,NAALAD2,CHORDC1	100005female:20458male:11:87
100005	21001	Carbohydrate	Body mass index (BMI)	3	151	0.000481264	0.231791	0.000440669	0	1	0.717372	1	1.61636e-05	0.0328404	ENSG00000013293.5,ENSG00000163584.13,ENSG00000163577.3,ENSG00000163581.9	SLC7A14,RPL22L1,EIF5A2,SLC2A2	100005female:21001male:3:151
100005	2139	Carbohydrate	Age first had sexual intercourse	3	41	0.000346715	0.54109	8.00422e-05	0.22974	1	0.251325	1	0.000185913	0.0426819	ENSG00000157093.4,ENSG00000114812.8,ENSG00000093183.9,ENSG00000008324.6,ENSG00000114857.13,ENSG00000114853.9,ENSG00000157119.11,ENSG00000010282.10,ENSG00000244607.1,ENSG00000181061.9,ENSG00000144648.10,ENSG00000273291.1,ENSG00000240747.3,ENSG00000180432.4,ENSG00000182983.10,ENSG00000144649.4,ENSG00000144647.5,ENSG00000163788.9,ENSG00000160746.8,ENSG00000011198.3	LYZL4,VIPR1,SEC22C,SS18L2,NKTR,ZBTB47,KLHL40,HHATL,CCDC13,HIGD1A,ACKR2,KRBOX1,KRBOX1,CYP8B1,ZNF662,FAM198A,POMGNT2,SNRK,ANO10,ABHD5	100005female:2139male:3:41
100005	2207	Carbohydrate	Wears glasses or contact lenses	15	14	0.000375876	0.212233	6.65323e-05	0.256482	1	0.234723	1	0.000104686	0.0391345	ENSG00000186073.7,ENSG00000134138.15	C15orf41,MEIS2	100005female:2207male:15:14
100005	23105	Carbohydrate	Basal metabolic rate	3	151	0.000481264	0.231791	0.000382493	0.000112514	1	0.69997	1	1.70397e-05	0.0329333	ENSG00000013293.5,ENSG00000163584.13,ENSG00000163577.3,ENSG00000163581.9	SLC7A14,RPL22L1,EIF5A2,SLC2A2	100005female:23105male:3:151
100005	23105	Carbohydrate	Basal metabolic rate	4	101	0.000135921	0.432385	3.74309e-05	0.5417	1	0.0309031	1	1.31706e-05	0.0328404	ENSG00000138801.4,ENSG00000164023.10,ENSG00000155016.13,ENSG00000138796.11,ENSG00000138795.5	PAPSS1,SGMS2,CYP2U1,HADH,LEF1	100005female:23105male:4:101
100005	23105	Carbohydrate	Basal metabolic rate	8	20	0.000131137	0.239122	0.000172475	0.0001333	-1	-1	-0.390139	1.31825e-05	0.0328404	ENSG00000136574.13,ENSG00000255394.2,ENSG00000154328.11,ENSG00000079459.8,ENSG00000255046.1,ENSG00000164733.16,ENSG00000205884.2,ENSG00000205883.2,ENSG00000205882.4,ENSG00000255098.1	GATA4,C8orf49,NEIL2,FDFT1,RP11-297N6.4,CTSB,DEFB136,DEFB135,DEFB134,RP11-481A20.11	100005female:23105male:8:20
100005	23105	Carbohydrate	Basal metabolic rate	14	51	0.000218858	0.342294	0.000197724	0.0205486	1	0.0125013	1	0.000123441	0.0402603	ENSG00000140043.7,ENSG00000258653.3,ENSG00000119725.13,ENSG00000156050.4,ENSG00000119723.11,ENSG00000187097.8,ENSG00000119636.11,ENSG00000119711.8,ENSG00000205659.6,ENSG00000119614.2,ENSG00000119688.16,ENSG00000133980.4,ENSG00000183379.4,ENSG00000119655.4,ENSG00000165898.9,ENSG00000119681.7,ENSG00000119682.12,ENSG00000214670.3,ENSG00000119616.7,ENSG00000119596.13,ENSG00000119608.8,ENSG00000119689…	PTGR2,RP5-1021I20.4,ZNF410,FAM161B,COQ6,ENTPD5,CCDC176,ALDH6A1,LIN52,VSX2,ABCD4,VRTN,SYNDIG1L,NPC2,ISCA2,LTBP2,AREL1,AC007956.1,FCF1,YLPM1,PROX2,DLST,RPS6KL1,PGF,EIF2B2,MLH3,ACYP1,ZC2HC1C,NEK9,TMED10	100005female:23105male:14:51
100005	3526	Carbohydrate	Mother's age at death	2	138	0.000146777	0.709849	0.000142041	0.116018	-1	-1	-0.118512	0.000252219	0.0453986	ENSG00000168280.12,ENSG00000150556.12,ENSG00000187123.10,ENSG00000168288.8,ENSG00000115963.9	KIF5C,LYPD6B,LYPD6,MMADHC,RND3	100005female:3526male:2:138
100005	50	Carbohydrate	Standing height	4	95	0.000109826	0.56627	0.000240869	0.0223352	-1	-1	-0.240124	2.45064e-05	0.0344835	ENSG00000138813.5,ENSG00000145331.9,ENSG00000138823.8,ENSG00000248713.1,ENSG00000070190.8,ENSG00000109270.8,ENSG00000164031.12,ENSG00000164032.7,ENSG00000145358.2	C4orf17,TRMT10A,MTTP,RP11-766F14.2,DAPP1,LAMTOR3,DNAJB14,H2AFZ,DDIT4L	100005female:50male:4:95
100005	50	Carbohydrate	Standing height	19	43	0.00111988	3.37262e-06	0.000895394	5.42818e-07	-0.776978	-0.923592	-0.436944	0.000277361	0.0465263	ENSG00000105323.12,ENSG00000105329.5,ENSG00000142039.3,ENSG00000255730.2,ENSG00000142046.10,ENSG00000123810.3,ENSG00000248098.6,ENSG00000077348.4,ENSG00000177191.2,ENSG00000105341.14,ENSG00000204978.2,ENSG00000007129.13,ENSG00000105352.6,ENSG00000007306.10,ENSG00000105388.10,ENSG00000267881.1,ENSG00000086548.8,ENSG00000170956.12,ENSG00000183103.6,ENSG00000142025.11,ENSG00000105372.2,ENSG000001053…	HNRNPUL1,TGFB1,CCDC97,CTC-435M10.3,TMEM91,B9D2,BCKDHA,EXOSC5,B3GNT8,ATP5SL,C19orf69,CEACAM21,CEACAM4,CEACAM7,CEACAM5,CEA,CEACAM6,CEACAM3,LYPD4,DMRTC2,RPS19,CD79A,ARHGEF1,RABAC1,ATP1A3,GRIK5,ZNF574,POU2F2,DEDD2,ZNF526,GSK3A,AC006486.9,AC006486.1,ERF,CIC,PAFAH1B3,PRR19,TMEM145,MEGF8,CNFN,LIPE,CXCL17,CEACAM1,CEACAM8,PSG3	100005female:50male:19:43
100005	I9_CHD	Carbohydrate	Major coronary heart disease event	2	56	0.000135825	0.494844	0.000179132	0.0137924	-1	-1	-0.323932	2.48316e-05	0.0345359			100005female:I9_CHDmale:2:56
100005	II_NEOPLASM	Carbohydrate	Neoplasms	9	22	8.10753e-05	0.78066	0.000114989	0.298179	1	0.153315	1	0.000326876	0.0487416	ENSG00000205549.4	C9orf92	100005female:II_NEOPLASMmale:9:22
100005	20002_1286	Carbohydrate	Depression	10	86	0.000723548	0.0222965	0.000173412	0	-1	-1	-0.547755	0.00020266	0.0435937	ENSG00000119922.7,ENSG00000119917.9,ENSG00000204010.3,ENSG00000185745.8,ENSG00000152778.7,ENSG00000152779.12,ENSG00000152782.12,ENSG00000138182.10	IFIT2,IFIT3,IFIT1B,IFIT1,IFIT5,SLC16A12,PANK1,KIF20B	100005female:20002_1286male:10:86
100150	100240	Drinking water intake	Coffee consumed	14	27	0.000328595	0.22169	0.000251513	0.426717	-1	-1	-0.30373	1.4535e-06	0.019746			100150female:100240male:14:27
100150	102	Drinking water intake	Pulse rate, automated reading	19	46	0.000466342	0.420108	0.000304273	0.128687	-1	-1	-0.621762	0.000162439	0.0417948	ENSG00000216588.4,ENSG00000073008.10,ENSG00000186567.8,ENSG00000213892.6,ENSG00000069399.8,ENSG00000142273.6,ENSG00000187244.6,ENSG00000130202.5,ENSG00000130204.8,ENSG00000130203.5,ENSG00000130208.5,ENSG00000267467.2,ENSG00000224916.4,ENSG00000234906.4,ENSG00000267114.1,ENSG00000104853.11,ENSG00000104856.9,ENSG00000104859.10,ENSG00000170684.4,ENSG00000142252.6,ENSG00000007047.10,ENSG00000104866.6…	IGSF23,PVR,CEACAM19,CEACAM16,BCL3,CBLC,BCAM,PVRL2,TOMM40,APOE,APOC1,APOC4,APOC4-APOC2,APOC2,CTB-129P6.11,CLPTM1,RELB,CLASRP,ZNF296,GEMIN7,MARK4,PPP1R37,NKPD1,TRAPPC6A,BLOC1S3,AC005779.2,AC006126.3,EXOC3L2,CKM,KLC3,L47234.1,ERCC2	100150female:102male:19:46
100150	1160	Drinking water intake	Sleep duration	2	47	0.000232531	0.286209	2.95202e-05	0.294498	1	0.0277028	1	4.89998e-06	0.026979	ENSG00000143924.14,ENSG00000115944.10,ENSG00000171126.7,ENSG00000057935.9,ENSG00000162881.5,ENSG00000162882.10	EML4,COX7A2L,KCNG3,MTA3,OXER1,HAAO	100150female:1160male:2:47
100150	20022	Drinking water intake	Birth weight	5	39	0.000213376	0.299078	7.50665e-05	0.270267	1	0.364136	1	5.12556e-06	0.026979	ENSG00000177721.3,ENSG00000172262.7,ENSG00000177453.3,ENSG00000112972.10,ENSG00000151882.7,ENSG00000151881.10,ENSG00000172244.4,ENSG00000172239.9,ENSG00000112992.12	ANXA2R,ZNF131,NIM1K,HMGCS1,CCL28,C5orf28,C5orf34,PAIP1,NNT	100150female:20022male:5:39
100150	2040	Drinking water intake	Risk taking	5	83	0.000450432	0.117249	2.00926e-05	0.323396	-1	-1	-0.181518	1.99642e-05	0.0338102			100150female:2040male:5:83
100150	20458	Drinking water intake	General happiness	2	152	0.000778838	0.0506115	7.72266e-05	0.56668	-1	-1	-0.476348	8.40674e-06	0.0305912	ENSG00000172318.4,ENSG00000198648.6	B3GALT1,STK39	100150female:20458male:2:152
100150	21001	Drinking water intake	Body mass index (BMI)	3	131	0.000782271	0	0.000112283	0.184981	1	0.545555	1	0.000205538	0.0437486	ENSG00000163754.13,ENSG00000071794.11,ENSG00000163755.4,ENSG00000047457.9,ENSG00000163762.2,ENSG00000169908.6,ENSG00000169903.6,ENSG00000018408.10,ENSG00000114744.4,ENSG00000206199.5,ENSG00000082996.15,ENSG00000070087.9,ENSG00000268175.1	GYG1,HLTF,HPS3,CP,TM4SF18,TM4SF1,TM4SF4,WWTR1,COMMD2,ANKUB1,RNF13,PFN2,AC117395.1	100150female:21001male:3:131
100150	21001	Drinking water intake	Body mass index (BMI)	7	92	0.000319484	0.191446	0.000130913	0.148889	-1	-1	-0.114111	0.000105637	0.0391345	ENSG00000106236.3,ENSG00000166448.10,ENSG00000196367.8,ENSG00000198742.5,ENSG00000185467.7,ENSG00000241685.4,ENSG00000130429.8,ENSG00000106244.8,ENSG00000106245.5,ENSG00000106246.13,ENSG00000248919.3,ENSG00000160917.10,ENSG00000214314.1,ENSG00000241468.3,ENSG00000198556.9,ENSG00000160908.14,ENSG00000196652.7,ENSG00000221909.2,ENSG00000197343.6,ENSG00000272647.1,ENSG00000197037.6,ENSG00000106258.9…	NPTX2,TMEM130,TRRAP,SMURF1,KPNA7,ARPC1A,ARPC1B,PDAP1,BUD31,PTCD1,ATP5J2-PTCD1,CPSF4,AC073063.1,ATP5J2,ZNF789,ZNF394,ZKSCAN5,FAM200A,ZNF655,GS1-259H13.10,ZSCAN25,CYP3A5,CYP3A7,CYP3A4	100150female:21001male:7:92
100150	21001	Drinking water intake	Body mass index (BMI)	19	46	0.000466342	0.420108	2.28758e-05	0.814337	-1	-1	-0.287529	9.76948e-05	0.0388849	ENSG00000216588.4,ENSG00000073008.10,ENSG00000186567.8,ENSG00000213892.6,ENSG00000069399.8,ENSG00000142273.6,ENSG00000187244.6,ENSG00000130202.5,ENSG00000130204.8,ENSG00000130203.5,ENSG00000130208.5,ENSG00000267467.2,ENSG00000224916.4,ENSG00000234906.4,ENSG00000267114.1,ENSG00000104853.11,ENSG00000104856.9,ENSG00000104859.10,ENSG00000170684.4,ENSG00000142252.6,ENSG00000007047.10,ENSG00000104866.6…	IGSF23,PVR,CEACAM19,CEACAM16,BCL3,CBLC,BCAM,PVRL2,TOMM40,APOE,APOC1,APOC4,APOC4-APOC2,APOC2,CTB-129P6.11,CLPTM1,RELB,CLASRP,ZNF296,GEMIN7,MARK4,PPP1R37,NKPD1,TRAPPC6A,BLOC1S3,AC005779.2,AC006126.3,EXOC3L2,CKM,KLC3,L47234.1,ERCC2	100150female:21001male:19:46
100150	2139	Drinking water intake	Age first had sexual intercourse	4	139	0.000295125	0.246932	0.000133312	0.093244	1	0.359736	1	0.000298391	0.047439			100150female:2139male:4:139
100150	2149	Drinking water intake	Lifetime number of sexual partners	2	165	0.000591886	0.0473682	0.000209156	0.0426801	1	0.206921	1	0.000105248	0.0391345	ENSG00000170035.11	UBE2E3	100150female:2149male:2:165
100150	2149	Drinking water intake	Lifetime number of sexual partners	9	101	0.00029444	0.161733	5.67602e-05	0.19207	1	0.107511	1	3.61112e-05	0.0357912	ENSG00000148204.7,ENSG00000119522.11,ENSG00000106689.6,ENSG00000119408.12,ENSG00000136930.8	CRB2,DENND1A,LHX2,NEK6,PSMB7	100150female:2149male:9:101
100150	2207	Drinking water intake	Wears glasses or contact lenses	2	102	0.000152563	0.355794	1.78111e-05	0.663775	1	0.283128	1	1.52908e-05	0.0328404	ENSG00000119147.5,ENSG00000115652.10,ENSG00000153165.14,ENSG00000269000.1	C2orf40,UXS1,RGPD3,AC108868.1	100150female:2207male:2:102
100150	22501	Drinking water intake	Year ended full time education	14	27	0.000328595	0.22169	7.43495e-05	0.60493	-1	-1	-0.129713	3.39664e-06	0.0251331			100150female:22501male:14:27
100150	23105	Drinking water intake	Basal metabolic rate	5	28	0.000159812	0.421106	7.34979e-05	0.214627	-1	-1	-0.0461046	0.000168504	0.0420477			100150female:23105male:5:28
100150	23105	Drinking water intake	Basal metabolic rate	11	13	8.80522e-05	0.767597	0.000120009	0.0975133	-1	-1	-0.0569057	3.29204e-06	0.0251331	ENSG00000255823.1,ENSG00000110315.2,ENSG00000133800.4,ENSG00000072952.14,ENSG00000198730.3,ENSG00000110321.11,ENSG00000236287.3	MTRNR2L8,RNF141,LYVE1,MRVI1,CTR9,EIF4G2,ZBED5	100150female:23105male:11:13
100150	50	Drinking water intake	Standing height	5	47	0.000148302	0.521067	0.000620771	1.00407e-07	1	0.10031	1	2.20068e-05	0.0340966	ENSG00000169271.1,ENSG00000178996.8,ENSG00000249016.1,ENSG00000164283.8,ENSG00000113088.5,ENSG00000145649.7,ENSG00000164287.8,ENSG00000164294.9,ENSG00000234602.3,ENSG00000152669.8,ENSG00000067248.5,ENSG00000039123.11,ENSG00000067113.12,ENSG00000177058.7,ENSG00000152670.14,ENSG00000164509.9	HSPB3,SNX18,RP11-45H22.3,ESM1,GZMK,GZMA,CDC20B,GPX8,MCIDAS,CCNO,DHX29,SKIV2L2,PPAP2A,SLC38A9,DDX4,IL31RA	100150female:50male:5:47
100150	50	Drinking water intake	Standing height	10	47	0.000467622	0.0950003	4.67914e-05	0.369152	-1	-1	-0.178118	0.000139993	0.0409533	ENSG00000198250.8,ENSG00000186807.9,ENSG00000215033.3,ENSG00000152726.14,ENSG00000072444.10,ENSG00000198035.9,ENSG00000197910.7,ENSG00000165390.11,ENSG00000215020.3,ENSG00000165388.8,ENSG00000107618.4,ENSG00000128802.3,ENSG00000107623.4	ANTXRL,ANXA8L2,AL603965.1,FAM21B,ASAH2C,AGAP9,FAM25G,ANXA8,AL591684.1,ZNF488,RBP3,GDF2,GDF10	100150female:50male:10:47
100150	924	Drinking water intake	Usual walking pace	11	56	0.000508819	0.218169	0.000106749	0.262073	0.946995	0.788179	0.979398	0.000222041	0.0442585	ENSG00000198877.1,ENSG00000186113.1,ENSG00000186117.2,ENSG00000186119.6,ENSG00000205030.1,ENSG00000205029.1,ENSG00000124900.8,ENSG00000187612.1,ENSG00000167825.3,ENSG00000174970.2,ENSG00000149133.1,ENSG00000181785.1,ENSG00000172154.4,ENSG00000181767.1,ENSG00000181761.5,ENSG00000167822.1,ENSG00000181752.3	OR5D13,OR5D14,OR5L1,OR5D18,OR5L2,OR5D16,TRIM51,OR5W2,OR5I1,OR10AG1,OR5F1,OR5AS1,OR8I2,OR8H2,OR8H3,OR8J3,OR8K5	100150female:924male:11:56
100150	II_NEOPLASM	Drinking water intake	Neoplasms	3	76	7.02112e-05	0.296821	3.84343e-05	0	1	0.0693069	1	0.000100467	0.0388924			100150female:II_NEOPLASMmale:3:76
100150	II_NEOPLASM	Drinking water intake	Neoplasms	10	49	0.000153632	0.467721	6.65708e-05	0.146332	-1	-1	-0.390939	4.19092e-06	0.0262747	ENSG00000165633.8,ENSG00000172538.6,ENSG00000204161.9,ENSG00000177354.7,ENSG00000165606.4,ENSG00000225830.6,ENSG00000243251.4,ENSG00000258838.1,ENSG00000070748.13,ENSG00000187714.5,ENSG00000178645.8,ENSG00000197444.5,ENSG00000227345.4,ENSG00000174196.5,ENSG00000174194.11,ENSG00000204152.6,ENSG00000204169.6,ENSG00000138294.9,ENSG00000138293.15	VSTM4,FAM170B,C10orf128,C10orf71,DRGX,ERCC6,PGBD3,ERCC6-PGBD3,CHAT,SLC18A3,C10orf53,OGDHL,PARG,FAM21D,AGAP8,TIMM23B,AGAP7,MSMB,NCOA4	100150female:II_NEOPLASMmale:10:49
100150	20002_1291	Drinking water intake	Mania/Bipolar disorder	8	29	0.000265444	0.385735	4.09282e-05	0.271438	-1	-1	-0.187919	9.22065e-06	0.0314208	ENSG00000104219.8,ENSG00000198791.7,ENSG00000155975.5,ENSG00000003987.9,ENSG00000003989.12	ZDHHC2,CNOT7,VPS37A,MTMR7,SLC7A2	100150female:20002_1291male:8:29
100150	20002_1291	Drinking water intake	Mania/Bipolar disorder	12	76	0.00056888	0.310562	1.92177e-05	0.584434	1	0.164316	1	1.53708e-05	0.0328404			100150female:20002_1291male:12:76
100240	102	Coffee consumed	Pulse rate, automated reading	7	97	0.000218166	0.412161	6.80177e-05	0.0400722	1	0.30413	1	1.08344e-05	0.0324382	ENSG00000005483.15,ENSG00000135250.12,ENSG00000091127.9,ENSG00000135249.3,ENSG00000185055.6	KMT2E,SRPK2,PUS7,RINT1,EFCAB10	100240female:102male:7:97
100240	1031	Coffee consumed	Frequency of friend/family visits	8	127	0.000508421	0.0915633	1.67248e-05	0.699523	1	0.106311	1	2.30516e-05	0.0343514	ENSG00000129295.4,ENSG00000165071.10,ENSG00000129292.16,ENSG00000042832.7,ENSG00000155926.9,ENSG00000104415.9,ENSG00000104419.10	LRRC6,TMEM71,PHF20L1,TG,SLA,WISP1,NDRG1	100240female:1031male:8:127
100240	1110	Coffee consumed	Length of mobile phone use	1	50	0.000266002	0.314535	0.000143919	0.0386276	1	0.435944	1	0.000322472	0.04864			100240female:1110male:1:50
100240	1110	Coffee consumed	Length of mobile phone use	8	18	0.00017645	0	9.12339e-05	0	1	0.378738	1	3.37406e-06	0.0251331	ENSG00000175806.10,ENSG00000184647.6	MSRA,PRSS55	100240female:1110male:8:18
100240	1110	Coffee consumed	Length of mobile phone use	10	91	0.000322477	0.389163	7.51152e-05	0.147471	1	0.0483048	1	0.000129348	0.0405803	ENSG00000095637.16,ENSG00000059573.4,ENSG00000119977.16,ENSG00000138185.12,ENSG00000270099.1,ENSG00000173088.8,ENSG00000269948.1,ENSG00000269920.1,ENSG00000188649.7,ENSG00000107443.11	SORBS1,ALDH18A1,TCTN3,ENTPD1,RP11-248J23.7,C10orf131,RP11-248J23.6,RP11-690P14.4,CC2D2B,CCNJ	100240female:1110male:10:91
100240	1160	Coffee consumed	Sleep duration	8	20	0.000170352	0.434184	0.000100142	0.00255397	1	0.10031	1	4.62919e-05	0.0367354	ENSG00000136574.13,ENSG00000255394.2,ENSG00000154328.11,ENSG00000079459.8,ENSG00000255046.1,ENSG00000164733.16,ENSG00000205884.2,ENSG00000205883.2,ENSG00000205882.4,ENSG00000255098.1	GATA4,C8orf49,NEIL2,FDFT1,RP11-297N6.4,CTSB,DEFB136,DEFB135,DEFB134,RP11-481A20.11	100240female:1160male:8:20
100240	1160	Coffee consumed	Sleep duration	9	60	0.000769608	0.156433	3.71665e-05	0.74115	-1	-1	-0.293729	1.99756e-05	0.0338102	ENSG00000196781.9,ENSG00000214929.3	TLE1,SPATA31D1	100240female:1160male:9:60
100240	1160	Coffee consumed	Sleep duration	11	110	0.000323256	0.151813	0.000240213	0.00122179	1	0.568957	1	1.11707e-05	0.0327302	ENSG00000149294.12,ENSG00000149292.12,ENSG00000170209.4,ENSG00000149295.9,ENSG00000166682.6,ENSG00000086827.4,ENSG00000228607.2,ENSG00000048028.7,ENSG00000149305.2,ENSG00000166736.7	NCAM1,TTC12,ANKK1,DRD2,TMPRSS5,ZW10,CLDN25,USP28,HTR3B,HTR3A	100240female:1160male:11:110
100240	1299	Coffee consumed	Salad / raw vegetable intake	7	92	0.00023183	0.228197	2.09301e-05	0.436511	1	0.0481048	1	2.03176e-05	0.0338102	ENSG00000106236.3,ENSG00000166448.10,ENSG00000196367.8,ENSG00000198742.5,ENSG00000185467.7,ENSG00000241685.4,ENSG00000130429.8,ENSG00000106244.8,ENSG00000106245.5,ENSG00000106246.13,ENSG00000248919.3,ENSG00000160917.10,ENSG00000214314.1,ENSG00000241468.3,ENSG00000198556.9,ENSG00000160908.14,ENSG00000196652.7,ENSG00000221909.2,ENSG00000197343.6,ENSG00000272647.1,ENSG00000197037.6,ENSG00000106258.9…	NPTX2,TMEM130,TRRAP,SMURF1,KPNA7,ARPC1A,ARPC1B,PDAP1,BUD31,PTCD1,ATP5J2-PTCD1,CPSF4,AC073063.1,ATP5J2,ZNF789,ZNF394,ZKSCAN5,FAM200A,ZNF655,GS1-259H13.10,ZSCAN25,CYP3A5,CYP3A7,CYP3A4	100240female:1299male:7:92
100240	1309	Coffee consumed	Fresh fruit intake	4	27	0.000333727	0.609879	5.38934e-05	0.560258	-1	-1	-0.183918	6.91672e-05	0.0383365	ENSG00000109606.8	DHX15	100240female:1309male:4:27
100240	1309	Coffee consumed	Fresh fruit intake	11	101	0.000300906	0.299217	6.97265e-05	0.479451	1	0.163716	1	2.67788e-05	0.0348184	ENSG00000137691.8,ENSG00000137693.9,ENSG00000023445.9,ENSG00000110330.4,ENSG00000152558.10,ENSG00000255482.1,ENSG00000137673.4,ENSG00000137674.3,ENSG00000255798.1,ENSG00000137675.4,ENSG00000118113.7,ENSG00000166670.5,ENSG00000196611.4	C11orf70,YAP1,BIRC3,BIRC2,TMEM123,RP11-315O6.2,MMP7,MMP20,RP11-817J15.3,MMP27,MMP8,MMP10,MMP1	100240female:1309male:11:101
100240	1309	Coffee consumed	Fresh fruit intake	12	50	0.000218514	0.109461	3.77226e-05	0.343088	-1	-1	-0.111911	3.53101e-05	0.0356499	ENSG00000161798.6,ENSG00000086159.8,ENSG00000161800.8,ENSG00000110881.7,ENSG00000066117.10,ENSG00000167588.8,ENSG00000178449.4,ENSG00000139624.8,ENSG00000050405.9,ENSG00000269529.1,ENSG00000185958.5,ENSG00000161813.16,ENSG00000066084.8,ENSG00000123268.4,ENSG00000186452.6,ENSG00000185432.10,ENSG00000214511.3,ENSG00000110911.10,ENSG00000050426.11,ENSG00000110925.2,ENSG00000135457.5,ENSG00000184271.…	AQP5,AQP6,RACGAP1,ASIC1,SMARCD1,GPD1,COX14,CERS5,LIMA1,AC140061.12,FAM186A,LARP4,DIP2B,ATF1,TMPRSS12,METTL7A,HIGD1C,SLC11A2,LETMD1,CSRNP2,TFCP2,POU6F1,AC139768.1,DAZAP2,SMAGP,BIN2,CELA1	100240female:1309male:12:50
100240	1558	Coffee consumed	Alcohol intake frequency.	18	32	0.000112619	0.406499	4.885e-05	0.0228814	-1	-1	-0.0231023	9.69218e-06	0.0317596	ENSG00000078142.7	PIK3C3	100240female:1558male:18:32
100240	1558	Coffee consumed	Alcohol intake frequency.	19	54	0.000342337	0.372119	8.17675e-05	0.18877	1	0.00190019	1	0.000308428	0.0479289	ENSG00000142512.10,ENSG00000105366.11,ENSG00000213822.5,ENSG00000254521.2,ENSG00000105492.11,ENSG00000105497.3,ENSG00000167765.3,ENSG00000105501.7,ENSG00000268500.1,ENSG00000254415.3,ENSG00000105509.6,ENSG00000171051.4,ENSG00000171049.8,ENSG00000187474.4,ENSG00000161551.8,ENSG00000198093.6,ENSG00000176024.12,ENSG00000256683.2,ENSG00000197619.9,ENSG00000142556.14,ENSG00000256087.2,ENSG00000197608.…	SIGLEC10,SIGLEC8,CEACAM18,SIGLEC12,SIGLEC6,ZNF175,AC018755.1,SIGLEC5,SIGLEC5,SIGLEC14,HAS1,FPR1,FPR2,FPR3,ZNF577,ZNF649,ZNF613,ZNF350,ZNF615,ZNF614,ZNF432,ZNF841,ZNF616,ZNF836	100240female:1558male:19:54
100240	20116_2	Coffee consumed	Smoking status: Current	7	133	0.000291837	0.576363	0.000156186	0.161676	-1	-1	-0.589759	6.39637e-05	0.0381041			100240female:20116_2male:7:133
100240	21001	Coffee consumed	Body mass index (BMI)	3	18	0.000977509	0.0620612	6.20158e-05	0.442665	-1	-1	-0.169717	3.53422e-05	0.0356499	ENSG00000131386.13,ENSG00000154813.5,ENSG00000154814.9,ENSG00000131378.9,ENSG00000092345.9,ENSG00000154822.11	GALNT15,DPH3,OXNAD1,RFTN1,DAZL,PLCL2	100240female:21001male:3:18
100240	21001	Coffee consumed	Body mass index (BMI)	8	18	0.00017645	0	0.000258004	2.61338e-05	1	0.255926	1	4.86694e-05	0.0370041	ENSG00000175806.10,ENSG00000184647.6	MSRA,PRSS55	100240female:21001male:8:18
100240	21001	Coffee consumed	Body mass index (BMI)	10	13	0.000311725	0.361782	0.000143644	0.111519	-1	-1	-0.217722	8.57226e-05	0.0387952			100240female:21001male:10:13
100240	21001	Coffee consumed	Body mass index (BMI)	13	38	8.49857e-05	0.616063	0.000110329	0.0294677	-1	-1	-0.239324	7.85422e-05	0.0387669	ENSG00000139734.13,ENSG00000083544.9	DIAPH3,TDRD3	100240female:21001male:13:38
100240	2139	Coffee consumed	Age first had sexual intercourse	5	124	0.000474144	0.325608	0.000166957	0.136937	1	0.566157	1	6.76171e-05	0.0381798	ENSG00000164284.10,ENSG00000145882.6,ENSG00000127743.5,ENSG00000113712.12,ENSG00000183111.7,ENSG00000155846.12,ENSG00000132915.6,ENSG00000155850.7,ENSG00000164296.6,ENSG00000113716.8,ENSG00000182578.9,ENSG00000113721.9,ENSG00000113722.12,ENSG00000011083.4,ENSG00000070808.11,ENSG00000183876.8,ENSG00000070814.13,ENSG00000019582.10,ENSG00000164587.7	GRPEL2,PCYOX1L,IL17B,CSNK1A1,ARHGEF37,PPARGC1B,PDE6A,SLC26A2,TIGD6,HMGXB3,CSF1R,PDGFRB,CDX1,SLC6A7,CAMK2A,ARSI,TCOF1,CD74,RPS14	100240female:2139male:5:124
100240	2139	Coffee consumed	Age first had sexual intercourse	8	18	0.00017645	0	0.000238992	1.20212e-05	-1	-1	-0.310131	9.80408e-05	0.0388849	ENSG00000175806.10,ENSG00000184647.6	MSRA,PRSS55	100240female:2139male:8:18
100240	2139	Coffee consumed	Age first had sexual intercourse	8	19	0.000171565	0.377803	0.000221257	1.88288e-06	-1	-1	-0.359736	1.1303e-06	0.0179946	ENSG00000171060.6,ENSG00000171056.6,ENSG00000258724.1,ENSG00000254093.4,ENSG00000171044.6,ENSG00000215346.3,ENSG00000104643.5,ENSG00000177710.5,ENSG00000184608.4,ENSG00000154319.10,ENSG00000136573.8	C8orf74,SOX7,SOX7,PINX1,XKR6,AF131215.5,MTMR9,SLC35G5,C8orf12,FAM167A,BLK	100240female:2139male:8:19
100240	2207	Coffee consumed	Wears glasses or contact lenses	2	81	0.000281118	0.607764	8.52904e-05	0.0518522	1	0.0221022	1	0.000105299	0.0391345			100240female:2207male:2:81
100240	22501	Coffee consumed	Year ended full time education	1	76	0.000382272	0.259153	0.000267358	0.576988	-1	-1	-0.417542	0.000154733	0.0415005	ENSG00000143013.8	LMO4	100240female:22501male:1:76
100240	23105	Coffee consumed	Basal metabolic rate	3	75	0.000362608	0.00164327	0.000236525	0.00048669	1	0.719772	1	0.000147885	0.0411751			100240female:23105male:3:75
100240	23105	Coffee consumed	Basal metabolic rate	8	18	0.00017645	0	8.97696e-05	0.0104731	1	0.227323	1	8.72816e-06	0.0307116	ENSG00000175806.10,ENSG00000184647.6	MSRA,PRSS55	100240female:23105male:8:18
100240	3526	Coffee consumed	Mother's age at death	8	15	0.000385044	0.0324685	4.99256e-05	0.25764	-1	-1	-0.0613061	2.57592e-05	0.0346708	ENSG00000182319.5,ENSG00000253958.1	SGK223,CLDN23	100240female:3526male:8:15
100240	924	Coffee consumed	Usual walking pace	15	63	0.000666247	0.1165	6.46201e-05	0.45653	-1	-1	-0.534153	9.98438e-05	0.0388849	ENSG00000185551.8,ENSG00000268484.1,ENSG00000185594.4	NR2F2,AC087477.1,SPATA8	100240female:924male:15:63
100240	20002_1223	Coffee consumed	Type 2 diabetes	2	209	0.000316348	0.173446	6.54344e-05	0.0728376	-1	-1	-0.325533	5.2022e-05	0.0371522	ENSG00000237412.2,ENSG00000135902.5,ENSG00000196811.7,ENSG00000221944.3,ENSG00000135930.9,ENSG00000115468.7,ENSG00000204120.10,ENSG00000115474.6,ENSG00000182600.5,ENSG00000066248.10,ENSG00000222001.2,ENSG00000115488.3	PRSS56,CHRND,CHRNG,TIGD1,EIF4E2,EFHD1,GIGYF2,KCNJ13,C2orf82,NGEF,AC106876.2,NEU2	100240female:20002_1223male:2:209
100240	20002_1223	Coffee consumed	Type 2 diabetes	3	19	0.00033404	0.263689	3.48268e-05	0.384554	1	0.146915	1	2.2079e-05	0.0340966	ENSG00000131374.10,ENSG00000182568.12	TBC1D5,SATB1	100240female:20002_1223male:3:19
102	1031	Pulse rate, automated reading	Frequency of friend/family visits	1	19	3.68233e-05	0.550078	3.9334e-05	0.497739	-1	-1	-0.360736	5.96243e-05	0.0376194	ENSG00000142619.4,ENSG00000159339.9,ENSG00000269468.1,ENSG00000179051.9,ENSG00000074964.12,ENSG00000117148.6	PADI3,PADI4,AC004824.2,RCC2,ARHGEF10L,ACTL8	102female:1031male:1:19
102	1110	Pulse rate, automated reading	Length of mobile phone use	3	50	0.000153558	0.00663945	4.15059e-05	0.355036	-1	-1	-0.511951	0.00023139	0.0447241	ENSG00000186451.1,ENSG00000144730.12,ENSG00000163666.4,ENSG00000157500.6,ENSG00000239388.4,ENSG00000174844.10,ENSG00000174840.8,ENSG00000168374.6,ENSG00000174839.8,ENSG00000163681.10,ENSG00000136068.10,ENSG00000163687.9,ENSG00000163686.9,ENSG00000163684.7,ENSG00000255154.3,ENSG00000168297.11,ENSG00000168291.8,ENSG00000168301.8,ENSG00000168306.8	SPATA12,IL17RD,HESX1,APPL1,ASB14,DNAH12,PDE12,ARF4,DENND6A,SLMAP,FLNB,DNASE1L3,ABHD6,RPP14,RPP14,PXK,PDHB,KCTD6,ACOX2	102female:1110male:3:50
102	1110	Pulse rate, automated reading	Length of mobile phone use	5	40	5.74191e-05	0.0917742	2.00988e-05	0.278565	-1	-1	-0.0353035	0.000244796	0.0452317	ENSG00000070193.4,ENSG00000112996.5	FGF10,MRPS30	102female:1110male:5:40
102	1110	Pulse rate, automated reading	Length of mobile phone use	17	47	9.1658e-05	0.246815	5.60405e-05	0.590014	-1	-1	-0.554755	0.000285443	0.0468256	ENSG00000087995.11,ENSG00000146872.13,ENSG00000011028.9,ENSG00000173838.7,ENSG00000170921.10,ENSG00000008283.11,ENSG00000159640.10,ENSG00000264813.1,ENSG00000173826.10,ENSG00000136485.10,ENSG00000136463.7,ENSG00000198909.3,ENSG00000136490.4,ENSG00000266173.1,ENSG00000125695.12,ENSG00000108588.9,ENSG00000198231.8,ENSG00000108592.12,ENSG00000087191.8,ENSG00000108604.11,ENSG00000213218.5,ENSG0000013…	METTL2A,TLK2,MRC2,MARCH10,TANC2,CYB561,ACE,ACE,KCNH6,DCAF7,TACO1,MAP3K3,LIMD2,STRADA,RP11-51F16.8,CCDC47,DDX42,FTSJ3,PSMC5,SMARCD2,CSH2,GH2,CSH1,CSHL1,GH1,CD79B,SCN4A,C17orf72,ICAM2	102female:1110male:17:47
102	1160	Pulse rate, automated reading	Sleep duration	2	116	3.03833e-05	0.233303	3.47022e-05	0.147466	1	0.182518	1	3.15343e-05	0.035163			102female:1160male:2:116
102	1160	Pulse rate, automated reading	Sleep duration	12	71	0.000139353	0.0110668	4.06721e-05	0	1	0.0377038	1	0.000126267	0.04033	ENSG00000180881.15,ENSG00000173401.5,ENSG00000180481.6,ENSG00000139278.5,ENSG00000111615.8,ENSG00000139289.9,ENSG00000187109.9	CAPS2,GLIPR1L1,GLIPR1L2,GLIPR1,KRR1,PHLDA1,NAP1L1	102female:1160male:12:71
102	1170	Pulse rate, automated reading	Getting up in morning	3	43	4.25357e-05	0.333619	2.86878e-05	0.449891	1	0.0391039	1	1.91284e-05	0.033603	ENSG00000163818.12,ENSG00000173585.11,ENSG00000163820.10,ENSG00000172215.5,ENSG00000173578.6,ENSG00000183625.10,ENSG00000163823.3,ENSG00000121807.5,ENSG00000160791.12,ENSG00000121797.9,ENSG00000012223.8,ENSG00000163825.3,ENSG00000163827.8,ENSG00000268324.1,ENSG00000241186.3,ENSG00000178038.12,ENSG00000181585.3,ENSG00000206549.8,ENSG00000261603.1,ENSG00000188086.8,ENSG00000178055.8,ENSG00000160808…	LZTFL1,CCR9,FYCO1,CXCR6,XCR1,CCR3,CCR1,CCR2,CCR5,CCRL2,LTF,RTP3,LRRC2,LUZPP1,TDGF1,ALS2CL,TMIE,PRSS50,PRSS46,PRSS45,PRSS42,MYL3,PTH1R,AC109583.1,CCDC12,NBEAL2,SETD2,KIF9,KLHL18,PTPN23,SCAP,ELP6	102female:1170male:3:43
102	1170	Pulse rate, automated reading	Getting up in morning	11	4	4.89731e-05	0.488717	7.93134e-05	0.302693	1	0.40294	1	4.82002e-05	0.0369996	ENSG00000129757.8,ENSG00000254827.1,ENSG00000110628.9,ENSG00000181649.5,ENSG00000205531.8,ENSG00000183562.2,ENSG00000110619.12,ENSG00000021762.15,ENSG00000182170.3,ENSG00000184350.8	CDKN1C,SLC22A18AS,SLC22A18,PHLDA2,NAP1L4,AC131971.1,CARS,OSBPL5,MRGPRG,MRGPRE	102female:1170male:11:4
102	1170	Pulse rate, automated reading	Getting up in morning	12	116	9.67158e-05	0.28093	5.21679e-05	0	-1	-1	-0.312531	9.66884e-05	0.0388849			102female:1170male:12:116
102	1170	Pulse rate, automated reading	Getting up in morning	18	32	4.1977e-05	0.180452	4.33088e-05	0.103614	1	0.111111	1	6.10953e-05	0.0378636	ENSG00000078142.7	PIK3C3	102female:1170male:18:32
102	1299	Pulse rate, automated reading	Salad / raw vegetable intake	9	52	0.000133816	0.000383927	0.0001027	0.0922675	-1	-1	-0.673767	0.000227407	0.0445374	ENSG00000107372.8,ENSG00000165091.11,ENSG00000165092.8,ENSG00000135046.9	ZFAND5,TMC1,ALDH1A1,ANXA1	102female:1299male:9:52
102	1309	Pulse rate, automated reading	Fresh fruit intake	3	75	4.63385e-05	0	0.000104957	0.0534047	-1	-1	-0.255326	1.92092e-05	0.0336869			102female:1309male:3:75
102	1309	Pulse rate, automated reading	Fresh fruit intake	4	87	3.78171e-05	0.231174	5.4542e-05	0.198742	-1	-1	-0.0523052	1.40027e-05	0.0328404			102female:1309male:4:87
102	1309	Pulse rate, automated reading	Fresh fruit intake	7	33	0.000393117	0.00273463	5.21962e-05	0.399317	1	0.444544	1	0.000180038	0.0424803	ENSG00000106049.4,ENSG00000106052.9,ENSG00000153814.7,ENSG00000146592.12	HIBADH,TAX1BP1,JAZF1,CREB5	102female:1309male:7:33
102	1309	Pulse rate, automated reading	Fresh fruit intake	9	72	1.30879e-05	0.6483	8.38617e-05	0.0423042	1	0.00150015	1	4.78631e-06	0.026979	ENSG00000165233.13,ENSG00000131669.5,ENSG00000165238.12,ENSG00000204352.2,ENSG00000188938.11,ENSG00000048828.12,ENSG00000197724.6	C9orf89,NINJ1,WNK2,C9orf129,FAM120AOS,FAM120A,PHF2	102female:1309male:9:72
102	1309	Pulse rate, automated reading	Fresh fruit intake	12	86	6.41238e-05	0.54748	5.75179e-05	0.438725	-1	-1	-0.030103	9.89964e-05	0.0388849	ENSG00000136040.4,ENSG00000258365.1,ENSG00000173588.10,ENSG00000057704.6	PLXNC1,RP11-1105G2.3,CCDC41,TMCC3	102female:1309male:12:86
102	1558	Pulse rate, automated reading	Alcohol intake frequency.	2	30	0.00103926	3.98739e-06	0.000547681	0.000110715	0.943394	0.540354	1	0.000308878	0.0479891	ENSG00000171303.5,ENSG00000213699.4,ENSG00000115163.10,ENSG00000157851.12,ENSG00000084764.6,ENSG00000119777.14,ENSG00000084693.11,ENSG00000228474.1,ENSG00000138080.9,ENSG00000138030.8,ENSG00000138028.10,ENSG00000143994.9,ENSG00000138073.9,ENSG00000186143.6,ENSG00000163792.5,ENSG00000138074.10,ENSG00000138085.12,ENSG00000084774.9,ENSG00000115194.6,ENSG00000163793.8,ENSG00000138100.9,ENSG0000016379…	KCNK3,SLC35F6,CENPA,DPYSL5,MAPRE3,TMEM214,AGBL5,OST4,EMILIN1,KHK,CGREF1,ABHD1,PREB,C2orf53,TCF23,SLC5A6,ATRAID,CAD,SLC30A3,DNAJC5G,TRIM54,UCN,MPV17,GTF3C2,EIF2B4,SNX17,ZNF513,PPM1G,NRBP1,KRTCAP3,IFT172,FNDC4,GCKR,AC109829.1,C2orf16,ZNF512,CCDC121,GPN1,SUPT7L,SLC4A1AP,AC074091.13,MRPL33,AC110084.1,RBKS,BRE,FOSL2	102female:1558male:2:30
102	1558	Pulse rate, automated reading	Alcohol intake frequency.	6	40	3.86051e-05	0.324616	3.2807e-05	0.325206	-1	-1	-0.215322	1.26397e-05	0.0328404	ENSG00000146233.3,ENSG00000153291.11,ENSG00000180113.11,ENSG00000146070.12,ENSG00000230062.4,ENSG00000112818.5,ENSG00000069122.14,ENSG00000153292.11,ENSG00000146072.6	CYP39A1,SLC25A27,TDRD6,PLA2G7,ANKRD66,MEP1A,GPR116,GPR110,TNFRSF21	102female:1558male:6:40
102	20022	Pulse rate, automated reading	Birth weight	1	164	1.57272e-05	0.839598	0.000384109	0.136227	1	0.30393	1	0.000175438	0.0422889	ENSG00000117707.11,ENSG00000143499.9,ENSG00000152104.7	PROX1,SMYD2,PTPN14	102female:20022male:1:164
102	20022	Pulse rate, automated reading	Birth weight	7	109	5.22741e-05	0.120923	0.000117923	0.255522	-1	-1	-0.371137	8.0794e-06	0.0302407	ENSG00000106278.7,ENSG00000008311.10	PTPRZ1,AASS	102female:20022male:7:109
102	20116_2	Pulse rate, automated reading	Smoking status: Current	11	63	0.000116358	0.126444	5.70903e-05	0.142921	1	0.319332	1	1.37383e-05	0.0328404	ENSG00000167996.11,ENSG00000269089.1,ENSG00000149503.8,ENSG00000168515.3,ENSG00000124939.4,ENSG00000124935.3,ENSG00000110484.6,ENSG00000197745.1,ENSG00000162174.8,ENSG00000149021.2,ENSG00000124942.9,ENSG00000254772.5,ENSG00000255508.3,ENSG00000149016.11,ENSG00000149480.2,ENSG00000149499.7,ENSG00000149489.4,ENSG00000149541.5,ENSG00000089597.12,ENSG00000185085.2,ENSG00000255432.1,ENSG00000162194.8,…	FTH1,AP003733.1,INCENP,SCGB1D1,SCGB2A1,SCGB1D2,SCGB2A2,SCGB1D4,ASRGL1,SCGB1A1,AHNAK,EEF1G,MIR3654,TUT1,MTA2,EML3,ROM1,B3GAT3,GANAB,INTS5,RP11-831H9.11,C11orf48,METTL12,C11orf83,UBXN1,LRRN4CL,BSCL2,HNRNPUL2-BSCL2,GNG3,HNRNPUL2,TTC9C,ZBTB3,POLR2G,TAF6L,TMEM223,TMEM179B,NXF1,STX5,WDR74,SLC3A2,CHRM1,SLC22A6,SLC22A8	102female:20116_2male:11:63
102	2040	Pulse rate, automated reading	Risk taking	14	25	2.94268e-05	0.152614	6.34099e-05	0.0527283	-1	-1	-0.468747	1.88562e-05	0.033363			102female:2040male:14:25
102	20458	Pulse rate, automated reading	General happiness	2	176	9.62995e-05	0.0951064	0.000175359	0.0946508	1	0.524752	1	1.12531e-06	0.0179946			102female:20458male:2:176
102	20458	Pulse rate, automated reading	General happiness	4	105	8.52953e-05	0.0713818	0.000105855	0.34488	1	0.161516	1	2.8805e-05	0.035163	ENSG00000174749.5,ENSG00000138660.7,ENSG00000145365.10,ENSG00000073331.13,ENSG00000178403.3,ENSG00000138658.11,ENSG00000174720.11	C4orf32,AP1AR,TIFA,ALPK1,NEUROG2,C4orf21,LARP7	102female:20458male:4:105
102	21001	Pulse rate, automated reading	Body mass index (BMI)	1	62	0.000216911	0.0704511	0.000691212	0.00174933	1	0.758376	1	0.000254912	0.0455357			102female:21001male:1:62
102	21001	Pulse rate, automated reading	Body mass index (BMI)	2	153	8.14385e-05	0.519025	0.000224217	0.0869644	1	0.617162	1	0.00024642	0.0452617	ENSG00000172292.10,ENSG00000163072.10,ENSG00000152253.4,ENSG00000152254.6,ENSG00000073734.8,ENSG00000073737.12	CERS6,NOSTRIN,SPC25,G6PC2,ABCB11,DHRS9	102female:21001male:2:153
102	21001	Pulse rate, automated reading	Body mass index (BMI)	3	21	0.000125859	0.125743	5.81874e-05	0	1	0.00670067	1	7.88109e-05	0.0387669			102female:21001male:3:21
102	21001	Pulse rate, automated reading	Body mass index (BMI)	3	161	0.000135198	0.0553468	0.000574134	2.00166e-06	-1	-1	-0.665967	8.47312e-05	0.0387952	ENSG00000172578.7,ENSG00000114796.11,ENSG00000163872.11,ENSG00000180834.3,ENSG00000175193.8,ENSG00000114770.12,ENSG00000186090.6,ENSG00000178084.1,ENSG00000186038.5,ENSG00000145191.7,ENSG00000161202.13,ENSG00000161203.9,ENSG00000161204.7,ENSG00000145198.10,ENSG00000214160.5,ENSG00000145194.13,ENSG00000163888.3,ENSG00000175166.12,ENSG00000114867.15,ENSG00000175182.9,ENSG00000114859.10,ENSG00000163…	KLHL6,KLHL24,YEATS2,MAP6D1,PARL,ABCC5,HTR3D,HTR3C,HTR3E,EIF2B5,DVL3,AP2M1,ABCF3,VWA5B2,ALG3,ECE2,CAMK2N2,PSMD2,EIF4G1,FAM131A,CLCN2,POLR2H,THPO,CHRD,RP11-433C9.2,EPHB3,MAGEF1	102female:21001male:3:161
102	21001	Pulse rate, automated reading	Body mass index (BMI)	4	75	7.50319e-05	0.522521	0.000138194	0.344866	1	0.549955	1	1.93823e-06	0.0211376	ENSG00000138769.6,ENSG00000138757.10,ENSG00000138768.10,ENSG00000156194.13,ENSG00000138744.10,ENSG00000198301.7,ENSG00000268788.1,ENSG00000138755.5,ENSG00000156219.12,ENSG00000169245.4,ENSG00000169248.8,ENSG00000138750.10,ENSG00000138760.4,ENSG00000189157.9,ENSG00000272414.1,ENSG00000118804.7,ENSG00000163749.13,ENSG00000138771.10,ENSG00000186212.2,ENSG00000138758.7,ENSG00000118816.5	CDKL2,G3BP2,USO1,PPEF2,NAAA,SDAD1,AC110615.1,CXCL9,ART3,CXCL10,CXCL11,NUP54,SCARB2,FAM47E,FAM47E-STBD1,FAM47E-STBD1,CCDC158,SHROOM3,SOWAHB,SEPT11,CCNI	102female:21001male:4:75
102	21001	Pulse rate, automated reading	Body mass index (BMI)	6	47	0.000255424	0	0.000225132	0.0019687	-0.931393	-1	-0.583558	0.000143855	0.0409986	ENSG00000124743.5,ENSG00000137269.10,ENSG00000146147.10,ENSG00000137251.11	KLHL31,LRRC1,MLIP,TINAG	102female:21001male:6:47
102	21001	Pulse rate, automated reading	Body mass index (BMI)	14	10	0.000118648	0.0155851	0.000373041	0.000743269	-1	-1	-0.638364	0.000173605	0.0422461	ENSG00000176165.7,ENSG00000186960.6,ENSG00000184304.10	FOXG1,C14orf23,PRKD1	102female:21001male:14:10
102	21001	Pulse rate, automated reading	Body mass index (BMI)	16	4	0.000131319	0.327292	0.000445231	0.00809184	-1	-1	-0.714771	3.05379e-06	0.0246952	ENSG00000168158.2,ENSG00000262621.2,ENSG00000232196.2,ENSG00000140987.15,ENSG00000103343.8,ENSG00000167981.4,ENSG00000122390.13,ENSG00000215131.6,ENSG00000103351.8,ENSG00000188827.6,ENSG00000213918.6,ENSG00000126602.6,ENSG00000005339.8,ENSG00000162104.5,ENSG00000185739.9,ENSG00000090447.7,ENSG00000126603.4,ENSG00000217930.3,ENSG00000103426.8,ENSG00000262246.1,ENSG00000168140.4,ENSG00000103423.9,E…	OR2C1,NAA60,MTRNR2L4,ZSCAN32,ZNF174,ZNF597,NAA60,C16orf90,CLUAP1,SLX4,DNASE1,TRAP1,CREBBP,ADCY9,SRL,TFAP4,GLIS2,PAM16,CORO7-PAM16,CORO7,VASN,DNAJA3,NMRAL1,HMOX2,CDIP1,C16orf96,UBALD1,MGRN1,NUDT16L1,ANKS3,C16orf71	102female:21001male:16:4
102	2139	Pulse rate, automated reading	Age first had sexual intercourse	1	44	0.00013014	0.0493248	0.000101719	0.156986	-1	-1	-0.432143	1.26009e-05	0.0328404	ENSG00000162373.8,ENSG00000227839.1,ENSG00000162374.12,ENSG00000142700.7,ENSG00000185104.15,ENSG00000123080.6,ENSG00000204006.4,ENSG00000123091.4	BEND5,AL645730.2,ELAVL4,DMRTA2,FAF1,CDKN2C,C1orf185,RNF11	102female:2139male:1:44
102	2139	Pulse rate, automated reading	Age first had sexual intercourse	5	147	0.000259298	0.00138528	4.94715e-05	0	-1	-1	-0.528153	1.70352e-06	0.0211376	ENSG00000184845.3,ENSG00000164466.8,ENSG00000113749.5,ENSG00000145920.10,ENSG00000051596.5,ENSG00000248469.1,ENSG00000182230.7,ENSG00000170085.13,ENSG00000122203.10,ENSG00000175414.6,ENSG00000048162.15,ENSG00000146066.2,ENSG00000175416.8,ENSG00000113194.8,ENSG00000146083.7,ENSG00000074276.6,ENSG00000169258.6,ENSG00000074317.6,ENSG00000175766.7,ENSG00000048140.13	DRD1,SFXN1,HRH2,CPLX2,THOC3,RP11-826N14.2,FAM153B,SIMC1,KIAA1191,ARL10,NOP16,HIGD2A,CLTB,FAF2,RNF44,CDHR2,GPRIN1,SNCB,EIF4E1B,TSPAN17	102female:2139male:5:147
102	2149	Pulse rate, automated reading	Lifetime number of sexual partners	11	80	0.000204346	7.89006e-05	6.89793e-05	0.189256	-1	-1	-0.0219022	0.000107978	0.0392644	ENSG00000165494.6,ENSG00000137494.9,ENSG00000137500.5	PCF11,ANKRD42,CCDC90B	102female:2149male:11:80
102	2149	Pulse rate, automated reading	Lifetime number of sexual partners	11	94	4.89678e-05	0.443782	7.68483e-05	0.340975	1	0.40334	1	0.000137811	0.0407291			102female:2149male:11:94
102	2149	Pulse rate, automated reading	Lifetime number of sexual partners	12	85	1.15076e-05	0.808317	0.000182415	0.0526229	1	0.189919	1	0.000226204	0.044504	ENSG00000173598.9,ENSG00000177889.5,ENSG00000198015.8,ENSG00000120833.9,ENSG00000169372.8	NUDT4,UBE2N,MRPL42,SOCS2,CRADD	102female:2149male:12:85
102	2207	Pulse rate, automated reading	Wears glasses or contact lenses	1	41	8.5076e-05	0.0562128	5.73028e-05	0.0143148	-1	-1	-0.209121	3.36022e-05	0.0351742	ENSG00000142945.8,ENSG00000142937.7,ENSG00000142959.4,ENSG00000173846.8,ENSG00000188396.2,ENSG00000222009.4,ENSG00000117425.9,ENSG00000070785.12,ENSG00000126107.10,ENSG00000126088.8,ENSG00000162415.6,ENSG00000186603.4,ENSG00000132781.13,ENSG00000132773.7,ENSG00000070759.12,ENSG00000236624.4,ENSG00000132763.10,ENSG00000117450.9,ENSG00000117448.9,ENSG00000132780.12,ENSG00000159588.10,ENSG0000015959…	KIF2C,RPS8,BEST4,PLK3,TCTEX1D4,BTBD19,PTCH2,EIF2B3,HECTD3,UROD,ZSWIM5,HPDL,MUTYH,TOE1,TESK2,CCDC163P,MMACHC,PRDX1,AKR1A1,NASP,CCDC17,GPBP1L1,TMEM69,IPP,MAST2,PIK3R3,TSPAN1,POMGNT1,LURAP1,RAD54L,LRRC41,UQCRH,NSUN4,FAAH,DMBX1,KNCN,MKNK1,MOB3C,ATPAF1,EFCAB14,TEX38	102female:2207male:1:41
102	2207	Pulse rate, automated reading	Wears glasses or contact lenses	2	202	5.87866e-05	0.275941	3.23435e-05	0.211237	-1	-1	-0.19652	9.81829e-05	0.0388849	ENSG00000124019.9,ENSG00000036257.8,ENSG00000135905.14	FAM124B,CUL3,DOCK10	102female:2207male:2:202
102	2207	Pulse rate, automated reading	Wears glasses or contact lenses	8	130	5.12261e-05	0.319777	0.000107575	0.0581563	-1	-1	-0.321932	0.000343281	0.0494601	ENSG00000131773.9	KHDRBS3	102female:2207male:8:130
102	2207	Pulse rate, automated reading	Wears glasses or contact lenses	11	2	4.97363e-05	0	4.42577e-05	0.203524	1	0.246725	1	1.70664e-05	0.0329333	ENSG00000198788.7,ENSG00000215182.6,ENSG00000117983.13,ENSG00000078902.11,ENSG00000267950.1,ENSG00000174672.11,ENSG00000182208.8,ENSG00000184545.6,ENSG00000205869.2,ENSG00000205867.2,ENSG00000196224.7,ENSG00000241598.4,ENSG00000185940.9,ENSG00000205864.1,ENSG00000244242.1,ENSG00000250644.1,ENSG00000117984.8	MUC2,MUC5AC,MUC5B,TOLLIP,AC136297.1,BRSK2,MOB2,DUSP8,KRTAP5-1,KRTAP5-2,KRTAP5-3,KRTAP5-4,KRTAP5-5,KRTAP5-6,IFITM10,RP11-295K3.1,CTSD	102female:2207male:11:2
102	22501	Pulse rate, automated reading	Year ended full time education	3	49	0.000125978	0.00394363	6.59472e-05	0.525097	-1	-1	-0.0869087	0.000355762	0.0499355	ENSG00000180376.12,ENSG00000163946.9	CCDC66,FAM208A	102female:22501male:3:49
102	23105	Pulse rate, automated reading	Basal metabolic rate	1	62	0.000216911	0.0704511	0.000382807	0.0062563	1	0.69677	1	0.000351443	0.0497164			102female:23105male:1:62
102	23105	Pulse rate, automated reading	Basal metabolic rate	3	124	0.000191739	0.0387368	0.00140166	0	1	0.636564	1	0.000195083	0.0431238	ENSG00000177311.6,ENSG00000155903.7,ENSG00000114125.9,ENSG00000114124.2,ENSG00000069849.6,ENSG00000114126.13	ZBTB38,RASA2,RNF7,GRK7,ATP1B3,TFDP2	102female:23105male:3:124
102	23105	Pulse rate, automated reading	Basal metabolic rate	3	161	0.000135198	0.0553468	0.00106372	1.22052e-06	-1	-1	-0.707171	4.75964e-05	0.0369996	ENSG00000172578.7,ENSG00000114796.11,ENSG00000163872.11,ENSG00000180834.3,ENSG00000175193.8,ENSG00000114770.12,ENSG00000186090.6,ENSG00000178084.1,ENSG00000186038.5,ENSG00000145191.7,ENSG00000161202.13,ENSG00000161203.9,ENSG00000161204.7,ENSG00000145198.10,ENSG00000214160.5,ENSG00000145194.13,ENSG00000163888.3,ENSG00000175166.12,ENSG00000114867.15,ENSG00000175182.9,ENSG00000114859.10,ENSG00000163…	KLHL6,KLHL24,YEATS2,MAP6D1,PARL,ABCC5,HTR3D,HTR3C,HTR3E,EIF2B5,DVL3,AP2M1,ABCF3,VWA5B2,ALG3,ECE2,CAMK2N2,PSMD2,EIF4G1,FAM131A,CLCN2,POLR2H,THPO,CHRD,RP11-433C9.2,EPHB3,MAGEF1	102female:23105male:3:161
102	23105	Pulse rate, automated reading	Basal metabolic rate	8	26	8.64394e-05	0.023547	9.577e-05	0.140149	1	0.30173	1	4.12709e-05	0.0363739			102female:23105male:8:26
102	23105	Pulse rate, automated reading	Basal metabolic rate	14	10	0.000118648	0.0155851	0.000126114	0.128698	-1	-1	-0.646365	3.31586e-05	0.035163	ENSG00000176165.7,ENSG00000186960.6,ENSG00000184304.10	FOXG1,C14orf23,PRKD1	102female:23105male:14:10
102	23105	Pulse rate, automated reading	Basal metabolic rate	16	4	0.000131319	0.327292	0.000504704	0.00228673	-1	-1	-0.733573	2.13124e-05	0.0340966	ENSG00000168158.2,ENSG00000262621.2,ENSG00000232196.2,ENSG00000140987.15,ENSG00000103343.8,ENSG00000167981.4,ENSG00000122390.13,ENSG00000215131.6,ENSG00000103351.8,ENSG00000188827.6,ENSG00000213918.6,ENSG00000126602.6,ENSG00000005339.8,ENSG00000162104.5,ENSG00000185739.9,ENSG00000090447.7,ENSG00000126603.4,ENSG00000217930.3,ENSG00000103426.8,ENSG00000262246.1,ENSG00000168140.4,ENSG00000103423.9,E…	OR2C1,NAA60,MTRNR2L4,ZSCAN32,ZNF174,ZNF597,NAA60,C16orf90,CLUAP1,SLX4,DNASE1,TRAP1,CREBBP,ADCY9,SRL,TFAP4,GLIS2,PAM16,CORO7-PAM16,CORO7,VASN,DNAJA3,NMRAL1,HMOX2,CDIP1,C16orf96,UBALD1,MGRN1,NUDT16L1,ANKS3,C16orf71	102female:23105male:16:4
102	3526	Pulse rate, automated reading	Mother's age at death	1	155	0.000216672	0.0330615	6.83546e-05	0.533564	-1	-1	-0.579158	0.000122999	0.0402602	ENSG00000232237.2,ENSG00000116857.12,ENSG00000163395.12,ENSG00000081277.7,ENSG00000118194.14,ENSG00000159166.9,ENSG00000159173.14,ENSG00000174307.5,ENSG00000159176.9,ENSG00000269690.1,ENSG00000134369.11,ENSG00000198700.5,ENSG00000198892.6,ENSG00000163431.11,ENSG00000134375.6,ENSG00000176393.6,ENSG00000163435.11,ENSG00000170075.8,ENSG00000143862.3,ENSG00000143851.11,ENSG00000133067.13,ENSG00000077…	ASCL5,TMEM9,IGFN1,PKP1,TNNT2,LAD1,TNNI1,PHLDA3,CSRP1,AC096677.1,NAV1,IPO9,SHISA4,LMOD1,TIMM17A,RNPEP,ELF3,GPR37L1,ARL8A,PTPN7,LGR6,UBE2T,PPP1R12B	102female:3526male:1:155
102	3526	Pulse rate, automated reading	Mother's age at death	7	6	9.85857e-05	0	7.26722e-05	0.496133	1	0.346335	1	0.00017667	0.0423525	ENSG00000164916.9,ENSG00000242802.2,ENSG00000157927.12,ENSG00000218823.1	FOXK1,AP5Z1,RADIL,PAPOLB	102female:3526male:7:6
102	50	Pulse rate, automated reading	Standing height	3	124	0.000191739	0.0387368	0.0032208	3.06832e-10	1	0.848185	1	5.74409e-07	0.015296	ENSG00000177311.6,ENSG00000155903.7,ENSG00000114125.9,ENSG00000114124.2,ENSG00000069849.6,ENSG00000114126.13	ZBTB38,RASA2,RNF7,GRK7,ATP1B3,TFDP2	102female:50male:3:124
102	50	Pulse rate, automated reading	Standing height	5	132	7.17101e-05	0.156566	0.000336628	0.000102112	-1	-1	-0.634763	0.000336678	0.0492657	ENSG00000145850.4,ENSG00000113249.8,ENSG00000135077.4,ENSG00000155868.7,ENSG00000113263.8,ENSG00000170613.4,ENSG00000055163.14,ENSG00000172568.4,ENSG00000135074.11,ENSG00000172548.10,ENSG00000039600.6,ENSG00000187658.6,ENSG00000113272.9,ENSG00000268432.1,ENSG00000155858.5	TIMD4,HAVCR1,HAVCR2,MED7,ITK,FAM71B,CYFIP2,FNDC9,ADAM19,NIPAL4,SOX30,C5orf52,THG1L,AC026407.1,LSM11	102female:50male:5:132
102	50	Pulse rate, automated reading	Standing height	11	62	0.000704176	3.25024e-09	0.000108177	0.227135	-1	-1	-0.626563	0.000273354	0.0463125	ENSG00000166961.10,ENSG00000172689.1,ENSG00000110104.7,ENSG00000183134.4,ENSG00000149506.6,ENSG00000110107.4,ENSG00000110108.5,ENSG00000006118.10,ENSG00000110446.5,ENSG00000013725.10,ENSG00000110448.6,ENSG00000167987.6,ENSG00000229859.4,ENSG00000229183.4,ENSG00000256713.3,ENSG00000167992.8,ENSG00000167986.9,ENSG00000149476.10,ENSG00000162144.5,ENSG00000149483.7,ENSG00000187049.5,ENSG00000149532.1…	MS4A15,MS4A10,CCDC86,PTGDR2,ZP1,PRPF19,TMEM109,TMEM132A,SLC15A3,CD6,CD5,VPS37C,PGA3,PGA4,PGA5,VWCE,DDB1,DAK,CYB561A3,TMEM138,TMEM216,CPSF7,RP11-286N22.8,SDHAF2,PPP1R32,LRRC10B,SYT7,DAGLA,MYRF,TMEM258,FEN1,FADS2,FADS1,FADS3,RAB3IL1	102female:50male:11:62
102	50	Pulse rate, automated reading	Standing height	11	117	4.58799e-05	0.468532	0.000435272	0.00165363	-1	-1	-0.537554	0.00026836	0.0461428	ENSG00000137642.8,ENSG00000259571.1	SORL1,BLID	102female:50male:11:117
102	50	Pulse rate, automated reading	Standing height	19	61	1.38721e-05	0.67491	0.000136056	0.0436187	-1	-1	-0.060306	1.67808e-07	0.00633252	ENSG00000179709.4,ENSG00000171487.10,ENSG00000142409.4,ENSG00000167685.10,ENSG00000204533.2,ENSG00000197487.4,ENSG00000197213.5,ENSG00000204532.2,ENSG00000131848.5,ENSG00000267908.1,ENSG00000267710.1,ENSG00000018869.12,ENSG00000198440.5,ENSG00000198046.7,ENSG00000196263.3,ENSG00000196867.3,ENSG00000197016.7	NLRP8,NLRP5,ZNF787,ZNF444,AC024580.1,GALP,ZSCAN5B,ZSCAN5C,ZSCAN5A,ZSCAN5D,AC006116.20,ZNF582,ZNF583,ZNF667,ZNF471,ZFP28,ZNF470	102female:50male:19:61
102	50	Pulse rate, automated reading	Standing height	20	8	2.10071e-05	0.722126	0.00271593	1.56717e-12	1	0.209521	1	4.4466e-05	0.0363745	ENSG00000125845.6	BMP2	102female:50male:20:8
102	924	Pulse rate, automated reading	Usual walking pace	2	68	3.27725e-05	0	0.000163817	0.0104403	1	0.388739	1	5.23211e-06	0.026979	ENSG00000115421.8,ENSG00000162924.9,ENSG00000162927.9,ENSG00000162928.8,ENSG00000162929.9,ENSG00000237651.2,ENSG00000173209.18,ENSG00000115464.10,ENSG00000082898.12,ENSG00000170264.8,ENSG00000115484.10,ENSG00000173163.6	PAPOLG,REL,PUS10,PEX13,KIAA1841,C2orf74,AHSA2,USP34,XPO1,FAM161A,CCT4,COMMD1	102female:924male:2:68
102	924	Pulse rate, automated reading	Usual walking pace	5	131	3.91865e-05	0.220087	6.56323e-05	0.0709254	-1	-1	-0.0335034	0.000250592	0.045377			102female:924male:5:131
102	924	Pulse rate, automated reading	Usual walking pace	10	39	4.72964e-05	0.349826	7.95149e-05	0.0638403	1	0.112111	1	5.92334e-05	0.0375939	ENSG00000108094.10,ENSG00000095794.15,ENSG00000108100.13,ENSG00000177291.3,ENSG00000177283.4	CUL2,CREM,CCNY,GJD4,FZD8	102female:924male:10:39
102	I9_CHD	Pulse rate, automated reading	Major coronary heart disease event	11	76	7.82911e-05	0.177583	1.84186e-05	0.696193	1	0.0915092	1	4.1276e-05	0.0363739			102female:I9_CHDmale:11:76
102	I9_CHD	Pulse rate, automated reading	Major coronary heart disease event	11	122	0.000156087	0.0388644	3.33119e-05	0.683286	1	0.0337034	1	0.000161351	0.0417794			102female:I9_CHDmale:11:122
102	I9_CHD	Pulse rate, automated reading	Major coronary heart disease event	14	11	9.27916e-05	0.338064	2.55953e-05	0.457197	-1	-1	-0.0633063	0.000236253	0.0448511	ENSG00000092140.10,ENSG00000092108.16,ENSG00000100473.11,ENSG00000196792.7,ENSG00000100478.10,ENSG00000092148.8,ENSG00000129493.10,ENSG00000203546.3,ENSG00000129480.8,ENSG00000151413.12	G2E3,SCFD1,COCH,STRN3,AP4S1,HECTD1,HEATR5A,RP11-176H8.1,DTD2,NUBPL	102female:I9_CHDmale:14:11
102	20002_1223	Pulse rate, automated reading	Type 2 diabetes	5	134	0.000121944	0.222204	8.99758e-05	0.414062	1	0.492549	1	0.000340026	0.0493806	ENSG00000145860.7,ENSG00000164332.6,ENSG00000113302.4,ENSG00000170214.3,ENSG00000113312.6,ENSG00000170234.8	RNF145,UBLCP1,IL12B,ADRA1B,TTC1,PWWP2A	102female:20002_1223male:5:134
102	20002_1223	Pulse rate, automated reading	Type 2 diabetes	8	9	0.000144346	0.118092	6.40595e-05	0	-1	-1	-0.619362	3.25302e-05	0.035163			102female:20002_1223male:8:9
102	20002_1286	Pulse rate, automated reading	Depression	15	64	2.36538e-05	0.756366	0.000134551	0.133619	-1	-1	-0.183718	9.78764e-06	0.0317596	ENSG00000251209.3,ENSG00000140450.7	LINC00923,ARRDC4	102female:20002_1286male:15:64
102	20002_1291	Pulse rate, automated reading	Mania/Bipolar disorder	10	97	0.000317494	0.213946	2.88483e-05	0.773367	1	0.429143	1	0.000173587	0.0422461	ENSG00000120055.5,ENSG00000138111.10,ENSG00000138107.7,ENSG00000107882.7,ENSG00000171206.9,ENSG00000138175.8,ENSG00000156398.8,ENSG00000166272.12,ENSG00000148795.5,ENSG00000166275.11,ENSG00000270316.1,ENSG00000214435.3,ENSG00000148842.13,ENSG00000076685.14,ENSG00000235376.5,ENSG00000148798.5,ENSG00000156374.10,ENSG00000148835.9,ENSG00000173915.8,ENSG00000148843.9,ENSG00000138172.6,ENSG00000185933…	C10orf95,TMEM180,ACTR1A,SUFU,TRIM8,ARL3,SFXN2,WBP1L,CYP17A1,C10orf32,C10orf32-ASMT,AS3MT,CNNM2,NT5C2,RPEL1,INA,PCGF6,TAF5,USMG5,PDCD11,CALHM2,CALHM1,CALHM3,NEURL1,SH3PXD2A,OBFC1,SLK,COL17A1,SFR1,WDR96,GSTO1,GSTO2,ITPRIP	102female:20002_1291male:10:97
1031	1110	Frequency of friend/family visits	Length of mobile phone use	4	129	5.477e-05	0	0.000119257	0.130997	-1	-1	-0.641364	0.000156552	0.0416361			1031female:1110male:4:129
1031	1110	Frequency of friend/family visits	Length of mobile phone use	6	106	0.000124081	0.530482	0.000164315	0.10693	-1	-1	-0.631763	5.49342e-06	0.0274624	ENSG00000111860.9,ENSG00000198523.5,ENSG00000111877.13,ENSG00000111875.7	CEP85L,PLN,MCM9,ASF1A	1031female:1110male:6:106
1031	1110	Frequency of friend/family visits	Length of mobile phone use	7	120	8.12249e-05	0	0.000188941	0.00717367	-1	-1	-0.592359	0.000226455	0.044504	ENSG00000181072.7,ENSG00000105894.7,ENSG00000157680.11	CHRM2,PTN,DGKI	1031female:1110male:7:120
1031	1110	Frequency of friend/family visits	Length of mobile phone use	10	83	2.81788e-05	0.532773	4.8833e-05	0.447547	-1	-1	-0.305731	0.000121247	0.0401957	ENSG00000182771.13,ENSG00000062650.13,ENSG00000122375.7	GRID1,WAPAL,OPN4	1031female:1110male:10:83
1031	1110	Frequency of friend/family visits	Length of mobile phone use	13	38	0.000162976	0.00895626	0.00010687	0.16579	-1	-1	-0.623762	0.000286522	0.0468818	ENSG00000139734.13,ENSG00000083544.9	DIAPH3,TDRD3	1031female:1110male:13:38
1031	1160	Frequency of friend/family visits	Sleep duration	5	131	6.79954e-05	0.48875	2.49454e-05	0.692815	1	0.150315	1	5.91193e-05	0.0375939			1031female:1160male:5:131
1031	1160	Frequency of friend/family visits	Sleep duration	7	79	4.74721e-05	0	2.91518e-05	0.712395	1	0.148715	1	7.8344e-05	0.0387669	ENSG00000153956.11	CACNA2D1	1031female:1160male:7:79
1031	1170	Frequency of friend/family visits	Getting up in morning	10	31	2.58541e-05	0.307025	1.58394e-05	0.637919	1	0.00630063	1	4.82639e-05	0.0369996	ENSG00000148459.11,ENSG00000136754.12,ENSG00000107890.12,ENSG00000136758.14,ENSG00000120539.10,ENSG00000107897.14	PDSS1,ABI1,ANKRD26,YME1L1,MASTL,ACBD5	1031female:1170male:10:31
1031	1170	Frequency of friend/family visits	Getting up in morning	12	38	5.58026e-06	0.199824	4.73841e-05	0.0753705	-1	-1	-0.252725	6.72353e-05	0.0381123	ENSG00000175548.4	ALG10B	1031female:1170male:12:38
1031	1170	Frequency of friend/family visits	Getting up in morning	16	7	0.000116823	0.00247887	0.000114326	0.0833928	-1	-1	-0.611561	0.00025489	0.0455357			1031female:1170male:16:7
1031	1558	Frequency of friend/family visits	Alcohol intake frequency.	3	88	3.00955e-05	0.627537	7.44368e-05	0.295017	1	0.234923	1	2.20192e-05	0.0340966			1031female:1558male:3:88
1031	1558	Frequency of friend/family visits	Alcohol intake frequency.	3	100	3.29395e-05	0.51431	1.95978e-05	0.663035	-1	-1	-0.0387039	0.000155164	0.0415224			1031female:1558male:3:100
1031	1558	Frequency of friend/family visits	Alcohol intake frequency.	3	147	9.30555e-05	0.334193	4.72888e-05	0	-1	-1	-0.448545	4.77742e-05	0.0369996	ENSG00000114200.5	BCHE	1031female:1558male:3:147
1031	1558	Frequency of friend/family visits	Alcohol intake frequency.	17	31	7.81408e-05	0.0316723	3.78221e-05	0.060653	-1	-1	-0.353135	1.56233e-05	0.0328404	ENSG00000141750.6,ENSG00000108306.7,ENSG00000125686.7,ENSG00000167258.9,ENSG00000171532.4,ENSG00000131771.9,ENSG00000131748.11,ENSG00000173991.5,ENSG00000141744.3,ENSG00000161395.8,ENSG00000141736.9,ENSG00000141741.7,ENSG00000141738.9,ENSG00000161405.12,ENSG00000186075.8,ENSG00000073605.14,ENSG00000172057.5,ENSG00000204913.5,ENSG00000167914.6,ENSG00000108344.10,ENSG00000108342.8,ENSG00000008838.1…	STAC2,FBXL20,MED1,CDK12,NEUROD2,PPP1R1B,STARD3,TCAP,PNMT,PGAP3,ERBB2,MIEN1,GRB7,IKZF3,ZPBP2,GSDMB,ORMDL3,LRRC3C,GSDMA,PSMD3,CSF3,MED24,THRA,NR1D1,MSL1,CASC3,RAPGEFL1,WIPF2,CDC6,RARA,CTD-2267D19.3,GJD3,TOP2A,IGFBP4,TNS4,CCR7,SMARCE1,KRT222,KRT222,KRT24	1031female:1558male:17:31
1031	20022	Frequency of friend/family visits	Birth weight	6	126	0.000164612	0.0443657	0.000136404	0	-1	-1	-0.285129	8.17882e-05	0.0387669	ENSG00000146416.12,ENSG00000189007.11,ENSG00000268402.1,ENSG00000034693.10,ENSG00000001036.9,ENSG00000112419.10,ENSG00000257065.1,ENSG00000135521.8,ENSG00000118491.7,ENSG00000118495.14,ENSG00000169976.5,ENSG00000135604.9	AIG1,ADAT2,AL031320.1,PEX3,FUCA2,PHACTR2,RP3-468K18.5,LTV1,ZC2HC1B,PLAGL1,SF3B5,STX11	1031female:20022male:6:126
1031	20116_2	Frequency of friend/family visits	Smoking status: Current	12	64	0.000124349	0.0763508	5.29278e-05	0.453492	-1	-1	-0.146515	0.000171238	0.0421575	ENSG00000127334.10,ENSG00000111537.4,ENSG00000111536.4,ENSG00000127318.6,ENSG00000111554.10	DYRK2,IFNG,IL26,IL22,MDM1	1031female:20116_2male:12:64
1031	2040	Frequency of friend/family visits	Risk taking	4	141	2.98259e-05	0.408212	5.92761e-05	0.0342457	-1	-1	-0.134913	4.25014e-05	0.0363739	ENSG00000189099.7,ENSG00000164142.11,ENSG00000059691.7,ENSG00000109670.9	PRSS48,FAM160A1,PET112,FBXW7	1031female:2040male:4:141
1031	2040	Frequency of friend/family visits	Risk taking	15	46	3.52128e-05	0.434963	5.59367e-05	0.174687	-1	-1	-0.218322	2.73679e-05	0.0350292	ENSG00000140403.8,ENSG00000140395.4,ENSG00000166426.7,ENSG00000136381.8,ENSG00000188266.9,ENSG00000268838.1,ENSG00000041357.11,ENSG00000169684.9,ENSG00000080644.11,ENSG00000117971.7,ENSG00000136378.10,ENSG00000185787.10,ENSG00000103811.11	DNAJA4,WDR61,CRABP1,IREB2,HYKK,AC027228.1,PSMA4,CHRNA5,CHRNA3,CHRNB4,ADAMTS7,MORF4L1,CTSH	1031female:2040male:15:46
1031	21001	Frequency of friend/family visits	Body mass index (BMI)	4	8	9.69834e-05	0.304042	3.07052e-05	0.698157	-1	-1	-0.253325	0.000190189	0.0428134	ENSG00000152969.12,ENSG00000109501.9,ENSG00000074211.9,ENSG00000013288.4,ENSG00000179010.10,ENSG00000268791.1,ENSG00000163993.6,ENSG00000178988.10,ENSG00000186222.3,ENSG00000170871.7,ENSG00000132405.14,ENSG00000173013.4,ENSG00000173011.11,ENSG00000109519.8	JAKMIP1,WFS1,PPP2R2C,MAN2B2,MRFAP1,AC093323.1,S100P,MRFAP1L1,BLOC1S4,KIAA0232,TBC1D14,CCDC96,TADA2B,GRPEL1	1031female:21001male:4:8
1031	21001	Frequency of friend/family visits	Body mass index (BMI)	5	23	3.59626e-05	0.320748	6.57587e-05	0.197345	1	0.0565057	1	5.79776e-05	0.0375657	ENSG00000164256.5,ENSG00000248874.1	PRDM9,C5orf17	1031female:21001male:5:23
1031	21001	Frequency of friend/family visits	Body mass index (BMI)	6	87	5.1527e-05	0.378583	0.000417114	1.42329e-06	-1	-1	-0.611761	0.000263061	0.045913	ENSG00000014123.9,ENSG00000112214.6,ENSG00000112218.7,ENSG00000123545.5,ENSG00000186231.12,ENSG00000146263.7	UFL1,FHL5,GPR63,NDUFAF4,KLHL32,MMS22L	1031female:21001male:6:87
1031	21001	Frequency of friend/family visits	Body mass index (BMI)	10	86	2.10311e-05	0.623521	0.000162708	0.0104552	-1	-1	-0.279128	7.33675e-06	0.0295748	ENSG00000119922.7,ENSG00000119917.9,ENSG00000204010.3,ENSG00000185745.8,ENSG00000152778.7,ENSG00000152779.12,ENSG00000152782.12,ENSG00000138182.10	IFIT2,IFIT3,IFIT1B,IFIT1,IFIT5,SLC16A12,PANK1,KIF20B	1031female:21001male:10:86
1031	21001	Frequency of friend/family visits	Body mass index (BMI)	17	39	5.72706e-05	0.448016	7.16076e-05	0.32019	1	0.0985099	1	3.92531e-05	0.0362489	ENSG00000154945.6,ENSG00000108848.11,ENSG00000173714.7,ENSG00000141232.4,ENSG00000008294.16,ENSG00000239672.3,ENSG00000243678.7,ENSG00000011052.17,ENSG00000011258.11,ENSG00000011260.9	ANKRD40,LUC7L3,WFIKKN2,TOB1,SPAG9,NME1,NME1-NME2,NME2,MBTD1,UTP18	1031female:21001male:17:39
1031	21001	Frequency of friend/family visits	Body mass index (BMI)	22	3	0.000204665	0.0304179	2.19729e-05	0.775209	-1	-1	-0.125113	0.000212722	0.0438967	ENSG00000215193.8,ENSG00000183785.10,ENSG00000184979.9,ENSG00000182824.6,ENSG00000161103.7,ENSG00000183628.8,ENSG00000100033.12,ENSG00000070413.14,ENSG00000100056.7,ENSG00000206203.3,ENSG00000063515.2,ENSG00000100075.5,ENSG00000070371.11,ENSG00000100084.10,ENSG00000242259.4,ENSG00000185608.4,ENSG00000070010.14,ENSG00000093009.5,ENSG00000184113.8	PEX26,TUBA8,USP18,AC008132.1,AC008132.13,DGCR6,PRODH,DGCR2,DGCR14,TSSK2,GSC2,SLC25A1,CLTCL1,HIRA,C22orf39,MRPL40,UFD1L,CDC45,CLDN5	1031female:21001male:22:3
1031	2139	Frequency of friend/family visits	Age first had sexual intercourse	3	80	5.24053e-05	0	0.000138567	0.0045718	1	0.388739	1	1.06085e-05	0.0324382	ENSG00000184500.10,ENSG00000169379.11,ENSG00000178750.2,ENSG00000178700.3,ENSG00000178694.5	PROS1,ARL13B,STX19,DHFRL1,NSUN3	1031female:2139male:3:80
1031	2139	Frequency of friend/family visits	Age first had sexual intercourse	4	97	0.000130024	0.0150934	0.000117521	0.0131855	1	0.69537	1	0.000134897	0.0405803	ENSG00000138821.8,ENSG00000109320.7,ENSG00000109323.4,ENSG00000109332.15,ENSG00000145354.5,ENSG00000164037.12,ENSG00000164038.10,ENSG00000164039.10,ENSG00000138778.7	SLC39A8,NFKB1,MANBA,UBE2D3,CISD2,SLC9B1,SLC9B2,BDH2,CENPE	1031female:2139male:4:97
1031	2139	Frequency of friend/family visits	Age first had sexual intercourse	5	68	3.55593e-05	0.19864	0.00015867	0.00115786	1	0.159116	1	2.45951e-05	0.034513	ENSG00000131730.11,ENSG00000131732.7,ENSG00000172497.4,ENSG00000145687.11,ENSG00000152348.11,ENSG00000186468.8,ENSG00000205464.7	CKMT2,ZCCHC9,ACOT12,SSBP2,ATG10,RPS23,ATP6AP1L	1031female:2139male:5:68
1031	2139	Frequency of friend/family visits	Age first had sexual intercourse	6	114	3.29186e-05	0.53027	6.82331e-05	0.601543	1	0.136714	1	4.11625e-05	0.0363739	ENSG00000118518.11,ENSG00000093144.14,ENSG00000255330.4,ENSG00000214338.6,ENSG00000189367.10,ENSG00000184530.8,ENSG00000172673.6	RNF146,ECHDC1,SOGA3,SOGA3,KIAA0408,C6orf58,THEMIS	1031female:2139male:6:114
1031	2139	Frequency of friend/family visits	Age first had sexual intercourse	7	3	0.000111483	0.0003339	0.000484383	2.76414e-06	0.925393	0.550755	1	0.000287458	0.0469047	ENSG00000164877.14,ENSG00000164880.11,ENSG00000198517.5,ENSG00000164855.11,ENSG00000157778.4,ENSG00000225968.4,ENSG00000205971.1,ENSG00000002822.11,ENSG00000176349.7,ENSG00000122687.13,ENSG00000106268.11,ENSG00000106266.4,ENSG00000106263.13	MICALL2,INTS1,MAFK,TMEM184A,PSMG3,ELFN1,AC074389.6,MAD1L1,AC110781.3,FTSJ2,NUDT1,SNX8,EIF3B	1031female:2139male:7:3
1031	2139	Frequency of friend/family visits	Age first had sexual intercourse	7	98	4.04991e-05	0.661843	0.000279357	0.0612082	1	0.129313	1	0.000196923	0.0432019	ENSG00000128536.11,ENSG00000008282.3,ENSG00000105835.7,ENSG00000253276.1	CDHR3,SYPL1,NAMPT,CCDC71L	1031female:2139male:7:98
1031	2139	Frequency of friend/family visits	Age first had sexual intercourse	7	106	0.000107343	0.022227	4.86271e-05	0.266849	1	0.532953	1	3.92559e-06	0.0262747	ENSG00000105989.4,ENSG00000154438.3,ENSG00000001626.10,ENSG00000077063.6,ENSG00000128534.3,ENSG00000106013.8	WNT2,ASZ1,CFTR,CTTNBP2,NAA38,ANKRD7	1031female:2139male:7:106
1031	2139	Frequency of friend/family visits	Age first had sexual intercourse	12	123	2.44194e-05	0.677189	8.04639e-05	0.162967	1	0.089709	1	8.05414e-06	0.0302407	ENSG00000269676.1,ENSG00000112787.8,ENSG00000187848.8,ENSG00000177084.12,ENSG00000176894.5,ENSG00000256632.3,ENSG00000247077.2,ENSG00000176915.10,ENSG00000090615.8,ENSG00000072609.13,ENSG00000196458.6,ENSG00000198393.3,ENSG00000198040.6,ENSG00000196387.5,ENSG00000214029.3,ENSG00000256223.1	MUC8,FBRSL1,P2RX2,POLE,PXMP2,RP13-672B3.2,PGAM5,ANKLE2,GOLGA3,CHFR,ZNF605,ZNF26,ZNF84,ZNF140,ZNF891,ZNF10	1031female:2139male:12:123
1031	2149	Frequency of friend/family visits	Lifetime number of sexual partners	3	80	5.24053e-05	0	5.79805e-05	0.124587	-1	-1	-0.00250025	0.000237111	0.0448801	ENSG00000184500.10,ENSG00000169379.11,ENSG00000178750.2,ENSG00000178700.3,ENSG00000178694.5	PROS1,ARL13B,STX19,DHFRL1,NSUN3	1031female:2149male:3:80
1031	2149	Frequency of friend/family visits	Lifetime number of sexual partners	4	129	5.477e-05	0	4.45335e-05	0.508186	-1	-1	-0.0623062	2.05801e-05	0.0338278			1031female:2149male:4:129
1031	2149	Frequency of friend/family visits	Lifetime number of sexual partners	12	57	8.73739e-05	0.203904	0.00011349	0.0833021	-1	-1	-0.351935	3.02671e-05	0.035163			1031female:2149male:12:57
1031	2207	Frequency of friend/family visits	Wears glasses or contact lenses	6	51	1.60253e-05	0	7.83014e-06	0.295396	1	0.342734	1	0.000141434	0.0409571			1031female:2207male:6:51
1031	22501	Frequency of friend/family visits	Year ended full time education	1	28	5.86057e-05	0.0960615	0.000260423	0.116391	1	0.193319	1	2.40592e-05	0.0344835	ENSG00000009780.11,ENSG00000117758.9,ENSG00000117751.13,ENSG00000268552.1,ENSG00000130775.11,ENSG00000117748.5,ENSG00000130768.10,ENSG00000158156.7,ENSG00000158161.11,ENSG00000169403.7,ENSG00000126698.6,ENSG00000215902.1,ENSG00000269804.1,ENSG00000130770.13,ENSG00000130766.4,ENSG00000130772.9,ENSG00000204138.8,ENSG00000180198.11,ENSG00000180098.5,ENSG00000120656.7,ENSG00000188060.6,ENSG0000016241…	FAM76A,STX12,PPP1R8,AL109927.1,THEMIS2,RPA2,SMPDL3B,XKR8,EYA3,PTAFR,DNAJC8,AL353354.1,AL353354.2,ATPIF1,SESN2,MED18,PHACTR4,RCC1,TRNAU1AP,TAF12,RAB42,GMEB1,YTHDF2	1031female:22501male:1:28
1031	22501	Frequency of friend/family visits	Year ended full time education	22	17	8.43503e-05	0.222453	0.000368379	0.269365	1	0.509551	1	0.000306836	0.0478439	ENSG00000133424.16	LARGE	1031female:22501male:22:17
1031	23105	Frequency of friend/family visits	Basal metabolic rate	4	6	4.4505e-05	0.515882	0.000223079	0.0206161	-1	-1	-0.485149	0.000269805	0.0461493	ENSG00000145220.9,ENSG00000168826.11,ENSG00000168824.10,ENSG00000168818.5,ENSG00000163132.6,ENSG00000170891.6	LYAR,ZBTB49,NSG1,STX18,MSX1,CYTL1	1031female:23105male:4:6
1031	23105	Frequency of friend/family visits	Basal metabolic rate	6	90	1.57039e-05	0.438833	0.000121959	0.000603986	1	0.00270027	1	1.53537e-05	0.0328404	ENSG00000112249.9	ASCC3	1031female:23105male:6:90
1031	23105	Frequency of friend/family visits	Basal metabolic rate	20	32	1.47058e-05	0.667702	0.00233104	1.52564e-10	1	0.273927	1	6.18382e-07	0.0153674	ENSG00000101019.17,ENSG00000204183.1,ENSG00000125965.4,ENSG00000126001.11,ENSG00000125975.9,ENSG00000125991.14,ENSG00000061656.5,ENSG00000214078.7,ENSG00000272897.1,ENSG00000244462.3,ENSG00000244005.8,ENSG00000125995.11,ENSG00000131051.16,ENSG00000025293.11,ENSG00000171222.6,ENSG00000149646.8,ENSG00000088367.16,ENSG00000269650.1,ENSG00000131043.7,ENSG00000080845.13,ENSG00000101335.5,ENSG000001187…	UQCC1,GDF5OS,GDF5,CEP250,C20orf173,ERGIC3,SPAG4,CPNE1,RP1-309K20.6,RBM12,NFS1,ROMO1,RBM39,PHF20,SCAND1,CNBD2,EPB41L1,AL121895.1,AAR2,DLGAP4,MYL9,TGIF2,TGIF2-C20orf24,C20orf24,SLA2,NDRG3,DSN1,SOGA1,TLDC2,SAMHD1,RBL1,RBL1,MROH8,RPN2,GHRH,MANBAL	1031female:23105male:20:32
1031	50	Frequency of friend/family visits	Standing height	2	156	3.39445e-05	0.26657	0.000554526	0	1	0.375338	1	1.97546e-05	0.0338102	ENSG00000222033.1,ENSG00000204335.3,ENSG00000204334.7,ENSG00000128683.9,ENSG00000115806.8,ENSG00000198586.9,ENSG00000123600.14,ENSG00000115827.9,ENSG00000071967.7	LINC01124,SP5,ERICH2,GAD1,GORASP2,TLK1,METTL8,DCAF17,CYBRD1	1031female:50male:2:156
1031	50	Frequency of friend/family visits	Standing height	5	92	6.55959e-05	0.146482	6.60865e-05	0.0637945	1	0.0319032	1	0.000195085	0.0431238	ENSG00000198961.5,ENSG00000112893.5,ENSG00000254106.1	PJA2,MAN2A1,AC011366.3	1031female:50male:5:92
1031	50	Frequency of friend/family visits	Standing height	20	32	1.47058e-05	0.667702	0.00372037	1.89841e-09	1	0.248925	1	8.77577e-07	0.0171953	ENSG00000101019.17,ENSG00000204183.1,ENSG00000125965.4,ENSG00000126001.11,ENSG00000125975.9,ENSG00000125991.14,ENSG00000061656.5,ENSG00000214078.7,ENSG00000272897.1,ENSG00000244462.3,ENSG00000244005.8,ENSG00000125995.11,ENSG00000131051.16,ENSG00000025293.11,ENSG00000171222.6,ENSG00000149646.8,ENSG00000088367.16,ENSG00000269650.1,ENSG00000131043.7,ENSG00000080845.13,ENSG00000101335.5,ENSG000001187…	UQCC1,GDF5OS,GDF5,CEP250,C20orf173,ERGIC3,SPAG4,CPNE1,RP1-309K20.6,RBM12,NFS1,ROMO1,RBM39,PHF20,SCAND1,CNBD2,EPB41L1,AL121895.1,AAR2,DLGAP4,MYL9,TGIF2,TGIF2-C20orf24,C20orf24,SLA2,NDRG3,DSN1,SOGA1,TLDC2,SAMHD1,RBL1,RBL1,MROH8,RPN2,GHRH,MANBAL	1031female:50male:20:32
1031	924	Frequency of friend/family visits	Usual walking pace	5	61	6.32742e-05	0.227762	3.5527e-05	0.409792	1	0.260726	1	0.000238279	0.0449773	ENSG00000113048.12,ENSG00000049883.10,ENSG00000178175.7,ENSG00000083312.13,ENSG00000157107.9,ENSG00000157111.8,ENSG00000164325.7,ENSG00000251493.2,ENSG00000145741.11,ENSG00000164331.5,ENSG00000164338.5,ENSG00000268217.1,ENSG00000214944.5	MRPS27,PTCD2,ZNF366,TNPO1,FCHO2,TMEM171,TMEM174,FOXD1,BTF3,ANKRA2,UTP15,AC008387.1,ARHGEF28	1031female:924male:5:61
1031	20002_1286	Frequency of friend/family visits	Depression	11	119	3.43175e-05	0.440821	9.2935e-05	0.1185	1	0.177318	1	1.28275e-05	0.0328404	ENSG00000166257.4,ENSG00000166261.6,ENSG00000221931.2,ENSG00000196099.4,ENSG00000204300.2,ENSG00000181518.2,ENSG00000171014.2,ENSG00000181499.2,ENSG00000196248.4,ENSG00000198674.3,ENSG00000254737.1,ENSG00000236981.1,ENSG00000234560.3,ENSG00000182634.7,ENSG00000110002.11,ENSG00000197309.2,ENSG00000255298.2,ENSG00000196341.2,ENSG00000197263.2,ENSG00000204293.2,ENSG00000196661.3,ENSG00000198657.3,EN…	SCN3B,ZNF202,OR6X1,OR6M1,TMEM225,OR8D4,OR4D5,OR6T1,OR10S1,OR10G6,OR10G4,OR10G9,OR10G8,OR10G7,VWA5A,OR10D3,OR8G5,OR8D1,OR8D2,OR8B2,OR8B3,OR8B4,OR8B8	1031female:20002_1286male:11:119
1110	1160	Length of mobile phone use	Sleep duration	2	162	1.20998e-05	0.544231	6.47336e-05	0.0546842	-1	-1	-0.0979098	0.000194005	0.0430424	ENSG00000018510.8,ENSG00000196659.9,ENSG00000197557.6,ENSG00000128655.12,ENSG00000155636.10	AGPS,TTC30B,TTC30A,PDE11A,RBM45	1110female:1160male:2:162
1110	1210	Length of mobile phone use	Snoring	11	2	0.000134103	0	2.04026e-05	0.775965	-1	-1	-0.185319	0.000182369	0.0426193	ENSG00000198788.7,ENSG00000215182.6,ENSG00000117983.13,ENSG00000078902.11,ENSG00000267950.1,ENSG00000174672.11,ENSG00000182208.8,ENSG00000184545.6,ENSG00000205869.2,ENSG00000205867.2,ENSG00000196224.7,ENSG00000241598.4,ENSG00000185940.9,ENSG00000205864.1,ENSG00000244242.1,ENSG00000250644.1,ENSG00000117984.8	MUC2,MUC5AC,MUC5B,TOLLIP,AC136297.1,BRSK2,MOB2,DUSP8,KRTAP5-1,KRTAP5-2,KRTAP5-3,KRTAP5-4,KRTAP5-5,KRTAP5-6,IFITM10,RP11-295K3.1,CTSD	1110female:1210male:11:2
1110	1299	Length of mobile phone use	Salad / raw vegetable intake	3	52	3.09935e-05	0.654008	4.99481e-05	0.459458	1	0.29653	1	0.00010336	0.0390591			1110female:1299male:3:52
1110	1299	Length of mobile phone use	Salad / raw vegetable intake	12	40	7.67969e-05	0.0787831	0.000109418	0.0513279	1	0.406741	1	5.55746e-06	0.0274624	ENSG00000180116.11,ENSG00000151229.8,ENSG00000188906.9,ENSG00000205592.9	C12orf40,SLC2A13,LRRK2,MUC19	1110female:1299male:12:40
1110	1558	Length of mobile phone use	Alcohol intake frequency.	4	97	1.45457e-05	0.786628	0.000368974	0.00188518	1	0.207521	1	0.000169686	0.0420477	ENSG00000138821.8,ENSG00000109320.7,ENSG00000109323.4,ENSG00000109332.15,ENSG00000145354.5,ENSG00000164037.12,ENSG00000164038.10,ENSG00000164039.10,ENSG00000138778.7	SLC39A8,NFKB1,MANBA,UBE2D3,CISD2,SLC9B1,SLC9B2,BDH2,CENPE	1110female:1558male:4:97
1110	1558	Length of mobile phone use	Alcohol intake frequency.	14	56	0.000120997	0.0940721	7.33366e-05	0.412465	-1	-1	-0.59776	8.35442e-05	0.0387952	ENSG00000211448.7	DIO2	1110female:1558male:14:56
1110	1558	Length of mobile phone use	Alcohol intake frequency.	17	17	0.000162117	0.00582979	1.44488e-05	0.617107	1	0.158316	1	1.37762e-05	0.0328404	ENSG00000239704.6,ENSG00000259024.2,ENSG00000175106.12,ENSG00000181464.2,ENSG00000241322.4,ENSG00000251537.4,ENSG00000221926.7,ENSG00000187607.11,ENSG00000255104.3,ENSG00000214946.9,ENSG00000170425.3,ENSG00000214941.3,ENSG00000011295.11,ENSG00000141027.16,ENSG00000227782.1,ENSG00000108474.12,ENSG00000166582.5,ENSG00000170315.9,ENSG00000187688.10,ENSG00000181350.7	CDRT4,TVP23C-CDRT4,TVP23C,CDRT1,CDRT1,RP11-385D13.1,TRIM16,ZNF286A,ZNF286A,TBC1D26,ADORA2B,ZSWIM7,TTC19,NCOR1,AC002553.1,PIGL,CENPV,UBB,TRPV2,FAM211A	1110female:1558male:17:17
1110	20022	Length of mobile phone use	Birth weight	18	12	2.60751e-05	0.727703	0.00023334	0.213814	1	0.457746	1	6.78864e-06	0.0287007	ENSG00000255112.2	CHMP1B	1110female:20022male:18:12
1110	20116_2	Length of mobile phone use	Smoking status: Current	1	34	5.32779e-05	0.409164	6.96642e-05	0.125403	1	0.308331	1	1.31394e-05	0.0328404	ENSG00000189280.3,ENSG00000189433.5,ENSG00000188910.7,ENSG00000187513.8,ENSG00000116544.7,ENSG00000271741.1,ENSG00000243749.1,ENSG00000163867.12,ENSG00000197056.5,ENSG00000116560.6,ENSG00000146463.7,ENSG00000142687.13,ENSG00000020129.11,ENSG00000116819.6,ENSG00000126067.7,ENSG00000142686.7,ENSG00000092853.9,ENSG00000134698.10,ENSG00000092847.6,ENSG00000126070.14,ENSG00000092850.7,ENSG00000116863.…	GJB5,GJB4,GJB3,GJA4,DLGAP3,RP11-244H3.4,ZMYM6NB,ZMYM6,ZMYM1,SFPQ,ZMYM4,KIAA0319L,NCDN,TFAP2E,PSMB2,C1orf216,CLSPN,AGO4,AGO1,AGO3,TEKT2,ADPRHL2,COL8A2,TRAPPC3,MAP7D1,THRAP3,SH3D21,EVA1B,RP11-268J15.5	1110female:20116_2male:1:34
1110	20116_2	Length of mobile phone use	Smoking status: Current	5	63	5.96106e-05	0.148467	3.11069e-05	0.0421675	-1	-1	-0.149115	4.25067e-05	0.0363739	ENSG00000176928.4,ENSG00000145700.5,ENSG00000113161.11,ENSG00000113163.11,ENSG00000122008.11,ENSG00000189045.9,ENSG00000152359.10	GCNT4,ANKRD31,HMGCR,COL4A3BP,POLK,ANKDD1B,POC5	1110female:20116_2male:5:63
1110	2040	Length of mobile phone use	Risk taking	15	46	6.90595e-05	0.106166	5.59367e-05	0.174687	1	0.19972	1	5.10682e-06	0.026979	ENSG00000140403.8,ENSG00000140395.4,ENSG00000166426.7,ENSG00000136381.8,ENSG00000188266.9,ENSG00000268838.1,ENSG00000041357.11,ENSG00000169684.9,ENSG00000080644.11,ENSG00000117971.7,ENSG00000136378.10,ENSG00000185787.10,ENSG00000103811.11	DNAJA4,WDR61,CRABP1,IREB2,HYKK,AC027228.1,PSMA4,CHRNA5,CHRNA3,CHRNB4,ADAMTS7,MORF4L1,CTSH	1110female:2040male:15:46
1110	20458	Length of mobile phone use	General happiness	3	61	0.000178088	0.00034258	0.000195724	0.157356	-1	-1	-0.488549	6.52559e-06	0.0281731	ENSG00000163377.10,ENSG00000163378.9,ENSG00000144747.10,ENSG00000144744.12,ENSG00000144746.6,ENSG00000163380.11,ENSG00000114541.10	FAM19A4,EOGT,TMF1,UBA3,ARL6IP5,LMOD3,FRMD4B	1110female:20458male:3:61
1110	21001	Length of mobile phone use	Body mass index (BMI)	3	75	4.2891e-05	0.355037	0.000391642	0.00283708	1	0.0821082	1	5.61625e-05	0.0375025			1110female:21001male:3:75
1110	21001	Length of mobile phone use	Body mass index (BMI)	3	169	4.94965e-05	0.465433	9.48042e-05	0.19075	-1	-1	-0.0275028	7.70157e-05	0.0387669	ENSG00000180611.6,ENSG00000127252.4,ENSG00000187527.6	MB21D2,HRASLS,ATP13A5	1110female:21001male:3:169
1110	21001	Length of mobile phone use	Body mass index (BMI)	4	40	5.58679e-05	0.270143	5.06625e-05	0.298493	1	0.0187019	1	9.67746e-05	0.0388849			1110female:21001male:4:40
1110	21001	Length of mobile phone use	Body mass index (BMI)	4	97	1.45457e-05	0.786628	0.000762653	0.000785656	1	0.0365037	1	2.22281e-05	0.0340966	ENSG00000138821.8,ENSG00000109320.7,ENSG00000109323.4,ENSG00000109332.15,ENSG00000145354.5,ENSG00000164037.12,ENSG00000164038.10,ENSG00000164039.10,ENSG00000138778.7	SLC39A8,NFKB1,MANBA,UBE2D3,CISD2,SLC9B1,SLC9B2,BDH2,CENPE	1110female:21001male:4:97
1110	21001	Length of mobile phone use	Body mass index (BMI)	11	99	8.71208e-05	0.180564	8.74518e-05	0	-1	-1	-0.475348	6.23962e-05	0.0378636	ENSG00000165895.13,ENSG00000170647.2,ENSG00000082175.10	ARHGAP42,TMEM133,PGR	1110female:21001male:11:99
1110	21001	Length of mobile phone use	Body mass index (BMI)	19	32	0.00010874	0.142786	0.00037889	0.0229461	1	0.69917	1	3.17751e-05	0.035163	ENSG00000105176.13,ENSG00000198597.4,ENSG00000268953.1	URI1,ZNF536,AC020952.1	1110female:21001male:19:32
1110	2139	Length of mobile phone use	Age first had sexual intercourse	3	156	0.000186526	0.0898445	0.000108294	0.277173	-1	-1	-0.542954	8.75619e-05	0.0387952	ENSG00000177565.11	TBL1XR1	1110female:2139male:3:156
1110	2139	Length of mobile phone use	Age first had sexual intercourse	7	79	5.78844e-05	0.303704	0.000160112	0.050882	-1	-1	-0.39774	4.79281e-06	0.026979	ENSG00000153956.11	CACNA2D1	1110female:2139male:7:79
1110	2139	Length of mobile phone use	Age first had sexual intercourse	7	92	7.35528e-05	0.285661	0.00015339	0.0257335	-1	-1	-0.176918	3.51272e-05	0.035626	ENSG00000106236.3,ENSG00000166448.10,ENSG00000196367.8,ENSG00000198742.5,ENSG00000185467.7,ENSG00000241685.4,ENSG00000130429.8,ENSG00000106244.8,ENSG00000106245.5,ENSG00000106246.13,ENSG00000248919.3,ENSG00000160917.10,ENSG00000214314.1,ENSG00000241468.3,ENSG00000198556.9,ENSG00000160908.14,ENSG00000196652.7,ENSG00000221909.2,ENSG00000197343.6,ENSG00000272647.1,ENSG00000197037.6,ENSG00000106258.9…	NPTX2,TMEM130,TRRAP,SMURF1,KPNA7,ARPC1A,ARPC1B,PDAP1,BUD31,PTCD1,ATP5J2-PTCD1,CPSF4,AC073063.1,ATP5J2,ZNF789,ZNF394,ZKSCAN5,FAM200A,ZNF655,GS1-259H13.10,ZSCAN25,CYP3A5,CYP3A7,CYP3A4	1110female:2139male:7:92
1110	2139	Length of mobile phone use	Age first had sexual intercourse	9	37	5.75629e-05	0.113749	7.64157e-05	0.180658	-1	-1	-0.113111	6.70974e-05	0.0381123			1110female:2139male:9:37
1110	2149	Length of mobile phone use	Lifetime number of sexual partners	13	70	0.000163421	0	6.20566e-05	0.614423	1	0.538354	1	0.000258748	0.0458258			1110female:2149male:13:70
1110	2149	Length of mobile phone use	Lifetime number of sexual partners	16	51	5.70641e-05	0.115935	2.78063e-05	0.38759	1	0.116512	1	2.80016e-05	0.035163	ENSG00000103035.6,ENSG00000196436.7,ENSG00000140839.7,ENSG00000090863.7,ENSG00000168411.9,ENSG00000168404.8,ENSG00000103089.4	PSMD7,NPIPB15,CLEC18B,GLG1,RFWD3,MLKL,FA2H	1110female:2149male:16:51
1110	2149	Length of mobile phone use	Lifetime number of sexual partners	21	12	0.000130057	0.0201523	-2.1684e-19	0	1	0.0969097	1	0.000348637	0.0496302			1110female:2149male:21:12
1110	2207	Length of mobile phone use	Wears glasses or contact lenses	3	75	4.2891e-05	0.355037	0.000119625	0.00845278	-1	-1	-0.165917	4.58036e-05	0.0366605			1110female:2207male:3:75
1110	23105	Length of mobile phone use	Basal metabolic rate	5	117	0.000105787	0.0713452	0.000512985	3.22246e-05	1	0.0829083	1	9.14122e-05	0.0387952	ENSG00000146021.10,ENSG00000177733.4,ENSG00000120729.5,ENSG00000078795.12,ENSG00000031003.6,ENSG00000061492.7,ENSG00000112981.3,ENSG00000112983.13,ENSG00000112984.7,ENSG00000094880.6,ENSG00000146013.6,ENSG00000158402.14,ENSG00000120709.6,ENSG00000120733.9,ENSG00000132563.11,ENSG00000120738.7,ENSG00000120705.8,ENSG00000113013.8,ENSG00000044115.16,ENSG00000146006.7,ENSG00000120725.8,ENSG00000015479…	KLHL3,HNRNPA0,MYOT,PKD2L2,FAM13B,WNT8A,NME5,BRD8,KIF20A,CDC23,GFRA3,CDC25C,FAM53C,KDM3B,REEP2,EGR1,ETF1,HSPA9,CTNNA1,LRRTM2,SIL1,MATR3,PAIP2,SLC23A1,MZB1,PROB1,SPATA24,DNAJC18,ECSCR,AC138517.1,TMEM173,UBE2D2,CXXC5,PSD2	1110female:23105male:5:117
1110	23105	Length of mobile phone use	Basal metabolic rate	9	36	4.43482e-05	0.337615	0.000131713	0.13912	-1	-1	-0.123112	3.22743e-05	0.035163			1110female:23105male:9:36
1110	3526	Length of mobile phone use	Mother's age at death	10	14	0.000115022	0.157973	0.000183431	0.113939	-1	-1	-0.0365037	0.00032128	0.0485428	ENSG00000048740.13,ENSG00000148429.10,ENSG00000134463.10	CELF2,USP6NL,ECHDC3	1110female:3526male:10:14
1110	50	Length of mobile phone use	Standing height	1	30	7.04375e-05	0.262313	0.000123989	0.338644	1	0.236924	1	5.62908e-05	0.0375025	ENSG00000162510.5,ENSG00000162511.7,ENSG00000162512.11,ENSG00000134644.11	MATN1,LAPTM5,SDC3,PUM1	1110female:50male:1:30
1110	50	Length of mobile phone use	Standing height	2	67	0.000130963	0.0579464	0.000366125	0.000445116	-1	-1	-0.69957	2.76834e-05	0.0351235			1110female:50male:2:67
1110	924	Length of mobile phone use	Usual walking pace	2	16	4.07758e-05	0.462277	4.85936e-05	0.425304	1	0.191919	1	4.92767e-06	0.026979	ENSG00000150873.7,ENSG00000162976.8,ENSG00000134318.9,ENSG00000169016.12,ENSG00000269074.1,ENSG00000196208.9,ENSG00000169006.6,ENSG00000134324.7	C2orf50,PQLC3,ROCK2,E2F6,AC099344.1,GREB1,NTSR2,LPIN1	1110female:924male:2:16
1110	I9_CHD	Length of mobile phone use	Major coronary heart disease event	20	8	0.000200699	0.0108305	5.36714e-05	0.423338	-1	-1	-0.630163	7.52116e-05	0.0387441	ENSG00000125845.6	BMP2	1110female:I9_CHDmale:20:8
1110	II_NEOPLASM	Length of mobile phone use	Neoplasms	12	74	5.50783e-05	0	8.57477e-05	0.179801	-1	-1	-0.0867087	4.88172e-05	0.0370041	ENSG00000177425.6,ENSG00000058272.11,ENSG00000269531.1,ENSG00000165899.6	PAWR,PPP1R12A,AC073569.1,OTOGL	1110female:II_NEOPLASMmale:12:74
1110	II_NEOPLASM	Length of mobile phone use	Neoplasms	17	3	7.56791e-05	0.0423343	8.32175e-05	0.00740625	-1	-1	-0.20252	8.67543e-05	0.0387952	ENSG00000074660.11,ENSG00000167705.7,ENSG00000174231.12,ENSG00000185561.8,ENSG00000167716.14,ENSG00000167711.9,ENSG00000132386.6,ENSG00000186532.7,ENSG00000132383.7,ENSG00000185924.6,ENSG00000108963.13,ENSG00000262664.1,ENSG00000177374.8,ENSG00000070366.9,ENSG00000167720.8,ENSG00000167721.6,ENSG00000141258.8,ENSG00000070444.10,ENSG00000127804.8,ENSG00000205821.4,ENSG00000007168.8,ENSG00000132361.…	SCARF1,RILP,PRPF8,TLCD2,WDR81,SERPINF2,SERPINF1,SMYD4,RPA1,RTN4RL1,DPH1,OVCA2,HIC1,SMG6,SRR,TSR1,SGSM2,MNT,METTL16,AC006435.1,PAFAH1B1,CLUH	1110female:II_NEOPLASMmale:17:3
1110	20002_1291	Length of mobile phone use	Mania/Bipolar disorder	7	20	0.000151829	0.0737391	0.000131563	0.10844	1	0.617162	1	0.00014532	0.0411052	ENSG00000006468.9	ETV1	1110female:20002_1291male:7:20
1160	1170	Sleep duration	Getting up in morning	6	88	0.000195177	0	0.000257926	0.00393241	-1	-1	-0.70097	0.000108596	0.039273	ENSG00000184486.7,ENSG00000112234.4	POU3F2,FBXL4	1160female:1170male:6:88
1160	1170	Sleep duration	Getting up in morning	16	17	0.000153905	0.0290893	6.54808e-05	0.330855	1	0.517752	1	0.000330761	0.0489624	ENSG00000175595.10,ENSG00000186260.12,ENSG00000140694.12,ENSG00000269049.1,ENSG00000103429.6,ENSG00000069764.5,ENSG00000224712.6,ENSG00000254852.4,ENSG00000103512.10,ENSG00000183426.11,ENSG00000179889.14,ENSG00000157045.4,ENSG00000085721.8,ENSG00000183793.9,ENSG00000156968.8,ENSG00000261130.1,ENSG00000166780.6,ENSG00000166783.15,ENSG00000072864.8	ERCC4,MKL2,PARN,AC092291.2,BFAR,PLA2G10,NPIPA3,NPIPA2,NOMO1,NPIPA1,PDXDC1,NTAN1,RRN3,NPIPA5,MPV17L,RP11-1021N1.1,C16orf45,KIAA0430,NDE1	1160female:1170male:16:17
1160	1210	Sleep duration	Snoring	7	18	3.18689e-05	0	4.91879e-05	0.118781	-1	-1	-0.418542	5.92564e-05	0.0375939	ENSG00000122644.8	ARL4A	1160female:1210male:7:18
1160	1309	Sleep duration	Fresh fruit intake	13	61	3.2376e-05	0.351341	1.86783e-05	0.632031	-1	-1	-0.0921092	0.000200342	0.0433757	ENSG00000178235.6	SLITRK1	1160female:1309male:13:61
1160	1309	Sleep duration	Fresh fruit intake	14	9	0.000106976	0.0784888	2.13752e-05	0.861579	-1	-1	-0.0611061	6.5759e-05	0.0381041			1160female:1309male:14:9
1160	1558	Sleep duration	Alcohol intake frequency.	12	38	2.02567e-05	0.362151	4.638e-05	0.0597083	-1	-1	-0.156116	4.37924e-05	0.0363745	ENSG00000175548.4	ALG10B	1160female:1558male:12:38
1160	20022	Sleep duration	Birth weight	11	109	6.40566e-05	0.18519	0.000403687	0.0133099	-1	-1	-0.134713	6.72781e-05	0.0381123	ENSG00000150750.6,ENSG00000196167.5,ENSG00000214290.3,ENSG00000110777.7,ENSG00000255093.1,ENSG00000137707.9,ENSG00000183644.9,ENSG00000204381.7,ENSG00000170145.4,ENSG00000137713.11,ENSG00000086848.10,ENSG00000258529.1,ENSG00000255561.2,ENSG00000137720.3,ENSG00000109846.3,ENSG00000170276.4,ENSG00000254445.1,ENSG00000149300.5,ENSG00000150764.9,ENSG00000150768.11,ENSG00000150773.6,ENSG00000150776.13…	C11orf53,COLCA1,COLCA2,POU2AF1,RP11-794P6.2,BTG4,C11orf88,LAYN,SIK2,PPP2R1B,ALG9,ALG9,FDXACB1,C11orf1,CRYAB,HSPB2,HSPB2-C11orf52,C11orf52,DIXDC1,DLAT,PIH1D2,C11orf57,TIMM8B,SDHD,SDHD,IL18,TEX12,AP002884.3,BCO2,PTS,PLET1,AP002884.2	1160female:20022male:11:109
1160	2040	Sleep duration	Risk taking	8	17	0.000103158	0.0429132	2.57474e-05	0.479804	1	0.0427043	1	1.24808e-05	0.0328404	ENSG00000173273.11	TNKS	1160female:2040male:8:17
1160	2040	Sleep duration	Risk taking	10	121	4.31214e-05	0.455265	0.00012131	0.142053	-1	-1	-0.29853	5.84755e-06	0.0277375	ENSG00000108010.7	GLRX3	1160female:2040male:10:121
1160	21001	Sleep duration	Body mass index (BMI)	1	165	2.98016e-05	0.517912	0.000148678	0.0798194	1	0.387739	1	0.000140688	0.0409571	ENSG00000082482.9,ENSG00000136636.8	KCNK2,KCTD3	1160female:21001male:1:165
1160	21001	Sleep duration	Body mass index (BMI)	4	138	1.66758e-05	0.836982	0.000110238	0.201314	-1	-1	-0.0137014	8.05979e-05	0.0387669	ENSG00000164168.3,ENSG00000164169.8,ENSG00000071205.7,ENSG00000151623.10	TMEM184C,PRMT10,ARHGAP10,NR3C2	1160female:21001male:4:138
1160	21001	Sleep duration	Body mass index (BMI)	19	25	1.96098e-05	0.300179	2.23899e-05	0.320465	-1	-1	-0.0241024	0.000191097	0.0428398	ENSG00000118620.8,ENSG00000160352.11,ENSG00000196705.4,ENSG00000182141.5,ENSG00000172687.9,ENSG00000196268.7,ENSG00000269237.1,ENSG00000197013.5	ZNF430,ZNF714,ZNF431,ZNF708,ZNF738,ZNF493,CTD-2561J22.3,ZNF429	1160female:21001male:19:25
1160	2149	Sleep duration	Lifetime number of sexual partners	4	157	6.1934e-05	0.193724	9.4869e-05	0.100734	1	0.554955	1	0.000260729	0.045854	ENSG00000145439.7,ENSG00000154447.10,ENSG00000137601.11,ENSG00000109572.9	CBR4,SH3RF1,NEK1,CLCN3	1160female:2149male:4:157
1160	2149	Sleep duration	Lifetime number of sexual partners	8	17	0.000103158	0.0429132	0.000179618	0.000353555	1	0.169717	1	4.53219e-05	0.0365738	ENSG00000173273.11	TNKS	1160female:2149male:8:17
1160	2149	Sleep duration	Lifetime number of sexual partners	8	19	0.000119129	0.000177073	0.000107154	0.00400599	1	0.267127	1	3.58462e-05	0.0356673	ENSG00000171060.6,ENSG00000171056.6,ENSG00000258724.1,ENSG00000254093.4,ENSG00000171044.6,ENSG00000215346.3,ENSG00000104643.5,ENSG00000177710.5,ENSG00000184608.4,ENSG00000154319.10,ENSG00000136573.8	C8orf74,SOX7,SOX7,PINX1,XKR6,AF131215.5,MTMR9,SLC35G5,C8orf12,FAM167A,BLK	1160female:2149male:8:19
1160	2149	Sleep duration	Lifetime number of sexual partners	13	26	4.41377e-05	0.312548	9.8972e-05	0.221458	1	0.145315	1	0.000316745	0.0483193	ENSG00000083635.7,ENSG00000133114.13,ENSG00000188342.7,ENSG00000180332.5,ENSG00000133112.12,ENSG00000174032.12,ENSG00000136152.10,ENSG00000165837.7,ENSG00000174015.5,ENSG00000215475.3	NUFIP1,GPALPP1,GTF2F2,KCTD4,TPT1,SLC25A30,COG3,FAM194B,SPERT,SIAH3	1160female:2149male:13:26
1160	2149	Sleep duration	Lifetime number of sexual partners	16	68	0.000161866	0.0163385	1.24795e-05	0.827231	-1	-1	-0.00770077	1.54321e-05	0.0328404	ENSG00000260456.2,ENSG00000131152.4,ENSG00000103264.11,ENSG00000140941.8,ENSG00000140948.7	C16orf95,RP11-178L8.4,FBXO31,MAP1LC3B,ZCCHC14	1160female:2149male:16:68
1160	22501	Sleep duration	Year ended full time education	5	20	6.45571e-05	0.450369	0.000225289	0.11466	-1	-1	-0.715172	7.1932e-06	0.0295748			1160female:22501male:5:20
1160	23105	Sleep duration	Basal metabolic rate	6	7	0.000135589	0.0337795	0.00107016	4.23145e-06	-0.955596	-1	-0.488949	0.000323598	0.048669	ENSG00000124782.15,ENSG00000124783.8,ENSG00000164304.11,ENSG00000124784.4,ENSG00000096696.9,ENSG00000168566.11	RREB1,SSR1,CAGE1,RIOK1,DSP,SNRNP48	1160female:23105male:6:7
1160	23105	Sleep duration	Basal metabolic rate	8	24	0.000116545	0.00745142	5.5472e-05	0.0849272	-1	-1	-0.423542	2.56025e-06	0.0228825			1160female:23105male:8:24
1160	23105	Sleep duration	Basal metabolic rate	15	27	4.54519e-05	0.418667	4.76613e-05	0.398259	1	0.210321	1	1.983e-05	0.0338102			1160female:23105male:15:27
1160	23105	Sleep duration	Basal metabolic rate	18	32	6.0083e-05	0.00947587	7.64149e-05	0.223274	-1	-1	-0.569757	7.24345e-05	0.0385191	ENSG00000078142.7	PIK3C3	1160female:23105male:18:32
1160	23105	Sleep duration	Basal metabolic rate	22	19	8.63285e-05	0.123183	6.62533e-05	0.199094	-1	-1	-0.445145	0.000177509	0.0424564	ENSG00000175329.8,ENSG00000100281.9,ENSG00000100284.16,ENSG00000100292.12,ENSG00000100297.11,ENSG00000100302.6,ENSG00000198125.8,ENSG00000268818.1,ENSG00000221963.5,ENSG00000128313.2	ISX,HMGXB4,TOM1,HMOX1,MCM5,RASD2,MB,AL049747.1,APOL6,APOL5	1160female:23105male:22:19
1160	50	Sleep duration	Standing height	3	61	0.000133146	0.234754	0.000191354	0	-1	-1	-0.269127	0.000337598	0.0493096	ENSG00000163377.10,ENSG00000163378.9,ENSG00000144747.10,ENSG00000144744.12,ENSG00000144746.6,ENSG00000163380.11,ENSG00000114541.10	FAM19A4,EOGT,TMF1,UBA3,ARL6IP5,LMOD3,FRMD4B	1160female:50male:3:61
1160	50	Sleep duration	Standing height	8	19	0.000119129	0.000177073	4.3765e-05	0.0808713	-1	-1	-0.00490049	9.618e-05	0.0388849	ENSG00000171060.6,ENSG00000171056.6,ENSG00000258724.1,ENSG00000254093.4,ENSG00000171044.6,ENSG00000215346.3,ENSG00000104643.5,ENSG00000177710.5,ENSG00000184608.4,ENSG00000154319.10,ENSG00000136573.8	C8orf74,SOX7,SOX7,PINX1,XKR6,AF131215.5,MTMR9,SLC35G5,C8orf12,FAM167A,BLK	1160female:50male:8:19
1160	50	Sleep duration	Standing height	12	110	5.3026e-05	0.263433	0.000184267	0.0983274	1	0.290329	1	2.31619e-05	0.0343514	ENSG00000089157.11,ENSG00000089159.11,ENSG00000089163.4,ENSG00000170890.9,ENSG00000135097.2,ENSG00000111775.2,ENSG00000111780.8,ENSG00000170855.3,ENSG00000257218.1,ENSG00000111786.4,ENSG00000088986.6,ENSG00000110871.10,ENSG00000022840.11,ENSG00000167272.6,ENSG00000157782.5,ENSG00000110917.3,ENSG00000175970.7,ENSG00000122971.4,ENSG00000157837.11,ENSG00000272214.1,ENSG00000135100.13,ENSG00000157895…	RPLP0,PXN,SIRT4,PLA2G1B,MSI1,COX6A1,AL021546.6,TRIAP1,GATC,SRSF9,DYNLL1,COQ5,RNF10,POP5,CABP1,MLEC,UNC119B,ACADS,SPPL3,AC079602.1,HNF1A,C12orf43,OASL,P2RX7,P2RX4,CAMKK2	1160female:50male:12:110
1160	50	Sleep duration	Standing height	13	18	4.34997e-05	0.234172	8.58705e-05	0.12792	1	0.484948	1	0.000148456	0.0411847	ENSG00000120697.4,ENSG00000120699.8,ENSG00000102710.15,ENSG00000180138.6,ENSG00000133110.10	ALG5,EXOSC8,SUPT20H,CSNK1A1L,POSTN	1160female:50male:13:18
1160	50	Sleep duration	Standing height	14	70	5.62845e-05	0.254099	0.000227257	0.017884	1	0.571357	1	0.0001533	0.0413864	ENSG00000100749.3,ENSG00000258869.1	VRK1,RP11-204N11.1	1160female:50male:14:70
1160	50	Sleep duration	Standing height	22	19	8.63285e-05	0.123183	0.000121716	0.0395912	-1	-1	-0.429743	5.25807e-06	0.026979	ENSG00000175329.8,ENSG00000100281.9,ENSG00000100284.16,ENSG00000100292.12,ENSG00000100297.11,ENSG00000100302.6,ENSG00000198125.8,ENSG00000268818.1,ENSG00000221963.5,ENSG00000128313.2	ISX,HMGXB4,TOM1,HMOX1,MCM5,RASD2,MB,AL049747.1,APOL6,APOL5	1160female:50male:22:19
1160	I9_CHD	Sleep duration	Major coronary heart disease event	2	6	1.10827e-05	0.838464	7.44792e-05	0.078241	-1	-1	-0.124512	0.000208199	0.0437892	ENSG00000171853.11,ENSG00000182551.9,ENSG00000255767.1,ENSG00000171865.5,ENSG00000171863.8,ENSG00000118004.13,ENSG00000151360.5,ENSG00000214866.3	TRAPPC12,ADI1,RP13-512J5.1,RNASEH1,RPS7,COLEC11,ALLC,DCDC2C	1160female:I9_CHDmale:2:6
1160	I9_CHD	Sleep duration	Major coronary heart disease event	5	136	7.85564e-05	0.136162	4.48536e-05	0.102149	1	0.256326	1	0.000150236	0.041265	ENSG00000145864.8,ENSG00000145863.6,ENSG00000022355.10	GABRB2,GABRA6,GABRA1	1160female:I9_CHDmale:5:136
1160	I9_CHD	Sleep duration	Major coronary heart disease event	14	51	0.000107573	0.159085	4.45755e-05	0.63519	1	0.331133	1	7.12495e-05	0.0383858	ENSG00000140043.7,ENSG00000258653.3,ENSG00000119725.13,ENSG00000156050.4,ENSG00000119723.11,ENSG00000187097.8,ENSG00000119636.11,ENSG00000119711.8,ENSG00000205659.6,ENSG00000119614.2,ENSG00000119688.16,ENSG00000133980.4,ENSG00000183379.4,ENSG00000119655.4,ENSG00000165898.9,ENSG00000119681.7,ENSG00000119682.12,ENSG00000214670.3,ENSG00000119616.7,ENSG00000119596.13,ENSG00000119608.8,ENSG00000119689…	PTGR2,RP5-1021I20.4,ZNF410,FAM161B,COQ6,ENTPD5,CCDC176,ALDH6A1,LIN52,VSX2,ABCD4,VRTN,SYNDIG1L,NPC2,ISCA2,LTBP2,AREL1,AC007956.1,FCF1,YLPM1,PROX2,DLST,RPS6KL1,PGF,EIF2B2,MLH3,ACYP1,ZC2HC1C,NEK9,TMED10	1160female:I9_CHDmale:14:51
1160	20002_1223	Sleep duration	Type 2 diabetes	15	19	3.26317e-05	0.172128	3.51545e-05	0.373707	-1	-1	-0.159916	2.20716e-05	0.0340966	ENSG00000166710.13,ENSG00000185880.8,ENSG00000167014.6,ENSG00000140263.9,ENSG00000140279.8,ENSG00000140274.9,ENSG00000140254.8,ENSG00000137857.13,ENSG00000138606.15,ENSG00000137860.7,ENSG00000171766.11,ENSG00000171763.13,ENSG00000166920.6,ENSG00000104154.5,ENSG00000104164.6,ENSG00000260170.1,ENSG00000137767.9	B2M,TRIM69,C15orf43,SORD,DUOX2,DUOXA2,DUOXA1,DUOX1,SHF,SLC28A2,GATM,SPATA5L1,C15orf48,SLC30A4,BLOC1S6,RP11-96O20.4,SQRDL	1160female:20002_1223male:15:19
1160	20002_1286	Sleep duration	Depression	12	71	3.79617e-05	0.296235	5.95702e-05	0.0969692	1	0.10331	1	3.70198e-05	0.0360156	ENSG00000180881.15,ENSG00000173401.5,ENSG00000180481.6,ENSG00000139278.5,ENSG00000111615.8,ENSG00000139289.9,ENSG00000187109.9	CAPS2,GLIPR1L1,GLIPR1L2,GLIPR1,KRR1,PHLDA1,NAP1L1	1160female:20002_1286male:12:71
1160	20002_1286	Sleep duration	Depression	19	58	0.000166768	0.0120053	4.8282e-05	0.473854	-1	-1	-0.184118	6.68182e-05	0.0381123	ENSG00000170906.11,ENSG00000105619.9,ENSG00000105618.9,ENSG00000088038.13,ENSG00000105617.3,ENSG00000167608.7,ENSG00000125505.12,ENSG00000170892.6,ENSG00000170889.9,ENSG00000204577.7,ENSG00000244482.5,ENSG00000105609.12,ENSG00000131042.9,ENSG00000170866.7,ENSG00000187116.9,ENSG00000239961.2,ENSG00000167613.11,ENSG00000167614.9,ENSG00000167615.12,ENSG00000182909.5,ENSG00000167617.2,ENSG00000167618…	NDUFA3,TFPT,PRPF31,CNOT3,LENG1,TMC4,MBOAT7,TSEN34,RPS9,LILRB3,LILRA6,LILRB5,LILRB2,LILRA3,LILRA5,LILRA4,LAIR1,TTYH1,LENG8,LENG9,CDC42EP5,LAIR2,KIR3DX1,LILRA2,LILRB1,LILRA1,AC009892.10,LILRB4	1160female:20002_1286male:19:58
1170	1210	Getting up in morning	Snoring	4	122	7.11873e-05	0.144438	7.25598e-05	0.0131285	1	0.252725	1	4.98104e-05	0.0370154	ENSG00000164066.8,ENSG00000151475.4,ENSG00000164070.7,ENSG00000142731.6,ENSG00000164073.5,ENSG00000164074.10,ENSG00000138709.13,ENSG00000164040.12	INTU,SLC25A31,HSPA4L,PLK4,MFSD8,C4orf29,LARP1B,PGRMC2	1170female:1210male:4:122
1170	1210	Getting up in morning	Snoring	19	17	2.49975e-05	0.59233	9.59121e-05	0.081697	-1	-1	-0.019702	2.89194e-05	0.035163	ENSG00000188269.4,ENSG00000127530.2,ENSG00000127515.1,ENSG00000185385.2,ENSG00000127529.7,ENSG00000105143.8,ENSG00000160994.3,ENSG00000105141.4,ENSG00000094661.2,ENSG00000105137.8,ENSG00000105135.11,ENSG00000074181.4,ENSG00000105131.3,ENSG00000141867.13,ENSG00000105127.4,ENSG00000011243.13,ENSG00000011451.13,ENSG00000105122.8,ENSG00000161031.8	OR7A5,OR7C1,OR7A10,OR7A17,OR7C2,SLC1A6,CCDC105,CASP14,OR1I1,SYDE1,ILVBL,NOTCH3,EPHX3,BRD4,AKAP8,AKAP8L,WIZ,RASAL3,PGLYRP2	1170female:1210male:19:17
1170	1309	Getting up in morning	Fresh fruit intake	9	3	1.89409e-05	0.615061	0.000142266	0	1	0.0755076	1	2.07267e-05	0.0338278			1170female:1309male:9:3
1170	1309	Getting up in morning	Fresh fruit intake	18	8	0.000100272	0.101399	1.83914e-05	0.783992	1	0.258326	1	0.000138494	0.0407833	ENSG00000101680.9,ENSG00000206422.2	LAMA1,LRRC30	1170female:1309male:18:8
1170	20022	Getting up in morning	Birth weight	2	181	1.03195e-05	0.742258	0.000152364	0.0173606	-1	-1	-0.0155016	0.000149474	0.0412362	ENSG00000003393.10,ENSG00000138395.10,ENSG00000155760.1,ENSG00000182329.6,ENSG00000116030.12,ENSG00000267889.1,ENSG00000055044.6,ENSG00000204217.8,ENSG00000138439.10	ALS2,CDK15,FZD7,AC079354.1,SUMO1,AC079354.2,NOP58,BMPR2,FAM117B	1170female:20022male:2:181
1170	20022	Getting up in morning	Birth weight	6	22	4.93846e-05	0.30629	3.30769e-05	0.734127	1	0.0257026	1	8.8907e-06	0.0307116			1170female:20022male:6:22
1170	20116_2	Getting up in morning	Smoking status: Current	6	29	8.1471e-05	0.0688859	2.91457e-05	0.642144	-1	-1	-0.180518	1.94805e-05	0.0338102	ENSG00000124493.9,ENSG00000137309.15,ENSG00000186577.7,ENSG00000272325.1,ENSG00000270800.1,ENSG00000124614.9,ENSG00000124507.6,ENSG00000124664.6,ENSG00000196821.5,ENSG00000124562.5,ENSG00000065060.12,ENSG00000064995.12	GRM4,HMGA1,C6orf1,NUDT3,RPS10-NUDT3,RPS10,PACSIN1,SPDEF,C6orf106,SNRPC,UHRF1BP1,TAF11	1170female:20116_2male:6:29
1170	20116_2	Getting up in morning	Smoking status: Current	7	129	0.000145541	0.0305894	1.26575e-05	0.77758	1	0.254125	1	0.000355219	0.0499153	ENSG00000155660.6,ENSG00000197362.9,ENSG00000204947.4,ENSG00000197024.4,ENSG00000170265.7,ENSG00000170260.4,ENSG00000204946.5,ENSG00000196453.7,ENSG00000181220.11,ENSG00000133619.13,ENSG00000181444.8,ENSG00000106479.6,ENSG00000171130.13	PDIA4,ZNF786,ZNF425,ZNF398,ZNF282,ZNF212,ZNF783,ZNF777,ZNF746,KRBA1,ZNF467,ZNF862,ATP6V0E2	1170female:20116_2male:7:129
1170	20116_2	Getting up in morning	Smoking status: Current	10	55	1.42018e-05	0.686109	0.000170237	3.51829e-05	-1	-1	-0.133113	7.10397e-07	0.0160848	ENSG00000249860.2	MTRNR2L5	1170female:20116_2male:10:55
1170	20116_2	Getting up in morning	Smoking status: Current	15	4	9.95741e-06	0.927932	0.000129051	0.489304	-1	-1	-0.227323	0.000120225	0.0401483	ENSG00000185823.2,ENSG00000128739.16,ENSG00000273173.1,ENSG00000214265.7	NPAP1,SNRPN,SNURF,SNURF	1170female:20116_2male:15:4
1170	2040	Getting up in morning	Risk taking	1	125	5.31254e-05	0.550056	4.81024e-05	0.515769	1	0.132313	1	3.19347e-05	0.035163	ENSG00000143190.17,ENSG00000198821.6,ENSG00000143162.7,ENSG00000198771.6,ENSG00000197965.7,ENSG00000143199.13,ENSG00000143158.6,ENSG00000143164.11,ENSG00000143147.10	POU2F1,CD247,CREG1,RCSD1,MPZL1,ADCY10,MPC2,DCAF6,GPR161	1170female:2040male:1:125
1170	2040	Getting up in morning	Risk taking	3	19	6.07651e-05	0.158983	0.000196584	0.000474454	1	0.079508	1	8.20623e-05	0.0387669	ENSG00000131374.10,ENSG00000182568.12	TBC1D5,SATB1	1170female:2040male:3:19
1170	2040	Getting up in morning	Risk taking	8	16	1.89178e-05	0.564019	0.000111516	0.0309921	1	0.206721	1	1.28159e-05	0.0328404	ENSG00000147324.6,ENSG00000104626.10,ENSG00000173281.4,ENSG00000253426.1	MFHAS1,ERI1,PPP1R3B,RP11-10A14.4	1170female:2040male:8:16
1170	21001	Getting up in morning	Body mass index (BMI)	1	81	4.08246e-05	0.0364835	3.83884e-05	0.367008	1	0.0715072	1	2.99309e-05	0.035163	ENSG00000162676.7,ENSG00000067208.10,ENSG00000122406.8,ENSG00000154511.7,ENSG00000143033.13,ENSG00000117500.8,ENSG00000122483.13,ENSG00000117505.8,ENSG00000137942.12	GFI1,EVI5,RPL5,FAM69A,MTF2,TMED5,CCDC18,DR1,FNBP1L	1170female:21001male:1:81
1170	21001	Getting up in morning	Body mass index (BMI)	2	136	8.11451e-05	0.0738793	6.90859e-05	0.25706	-1	-1	-0.136114	0.000333872	0.0491342			1170female:21001male:2:136
1170	21001	Getting up in morning	Body mass index (BMI)	2	178	0.000258269	0.0129972	0.000185375	0.0388413	1	0.188519	1	0.00029838	0.047439	ENSG00000115524.11,ENSG00000115520.4,ENSG00000144381.12,ENSG00000115541.6,ENSG00000270757.1,ENSG00000115540.10,ENSG00000162944.6,ENSG00000222017.1,ENSG00000247626.3,ENSG00000152430.13,ENSG00000115896.11	SF3B1,COQ10B,HSPD1,HSPE1,HSPE1-MOB4,MOB4,RFTN2,AC011997.1,MARS2,BOLL,PLCL1	1170female:21001male:2:178
1170	21001	Getting up in morning	Body mass index (BMI)	2	189	0.000103772	0	8.37551e-05	0.331238	1	0.685969	1	8.82299e-05	0.0387952			1170female:21001male:2:189
1170	21001	Getting up in morning	Body mass index (BMI)	7	37	1.8957e-05	0.458696	8.03902e-05	0.0304384	-1	-1	-0.112511	6.395e-05	0.0381041	ENSG00000106355.5,ENSG00000105778.13,ENSG00000170852.6,ENSG00000122642.6,ENSG00000122643.14,ENSG00000164610.4	LSM5,AVL9,KBTBD2,FKBP9,NT5C3A,RP9	1170female:21001male:7:37
1170	21001	Getting up in morning	Body mass index (BMI)	16	34	0.000182016	0.0728409	0.00308681	3.09672e-18	0.833383	0.507151	1	1.80212e-05	0.0331133	ENSG00000103479.10,ENSG00000166971.12,ENSG00000103494.8,ENSG00000140718.14,ENSG00000259517.1,ENSG00000177508.11	RBL2,AKTIP,RPGRIP1L,FTO,RP11-324D17.1,IRX3	1170female:21001male:16:34
1170	2139	Getting up in morning	Age first had sexual intercourse	17	45	0.000194468	0.00184781	9.83672e-05	0.0619229	-1	-1	-0.533153	2.20358e-05	0.0340966	ENSG00000255713.1,ENSG00000121053.5,ENSG00000011143.12,ENSG00000167419.6,ENSG00000005381.6,ENSG00000005379.11,ENSG00000213246.2,ENSG00000108375.8,ENSG00000176160.5,ENSG00000108389.5,ENSG00000108387.10,ENSG00000181013.3,ENSG00000121101.11,ENSG00000108384.10,ENSG00000175175.4,ENSG00000108395.9,ENSG00000182628.8,ENSG00000068489.8,ENSG00000265303.1,ENSG00000167447.8,ENSG00000153982.6,ENSG00000175155.…	OR4D2,EPX,MKS1,LPO,MPO,BZRAP1,SUPT4H1,RNF43,HSF5,MTMR4,SEPT4,C17orf47,TEX14,RAD51C,PPM1E,TRIM37,SKA2,PRR11,CTD-2510F5.6,SMG8,GDPD1,YPEL2,DHX40,CLTC,PTRH2,VMP1,TUBD1,RPS6KB1,RP11-178C3.1,RNFT1,HEATR6,CA4,USP32,C17orf64	1170female:2139male:17:45
1170	2207	Getting up in morning	Wears glasses or contact lenses	4	118	3.84247e-05	0.36072	3.39752e-05	0.467444	1	0.344934	1	2.09135e-06	0.0217434			1170female:2207male:4:118
1170	22501	Getting up in morning	Year ended full time education	6	99	7.39351e-05	0	7.25627e-05	0.629552	1	0.00790079	1	1.23644e-05	0.0328404	ENSG00000203797.5,ENSG00000004809.9,ENSG00000155111.10,ENSG00000123505.10,ENSG00000155115.6,ENSG00000197498.8	DDO,SLC22A16,CDK19,AMD1,GTF3C6,RPF2	1170female:22501male:6:99
1170	22501	Getting up in morning	Year ended full time education	8	93	9.95881e-05	0.259142	0.000266627	0.422158	-1	-1	-0.349135	0.000199048	0.0433085	ENSG00000079102.12,ENSG00000205133.7,ENSG00000212999.1,ENSG00000254318.1,ENSG00000268080.1,ENSG00000188343.8,ENSG00000183808.7,ENSG00000212998.1,ENSG00000164953.11,ENSG00000164951.11	RUNX1T1,TRIQK,AC117834.1,C8orf87,AC016885.1,FAM92A1,RBM12B,RBM12B-AS1,TMEM67,PDP1	1170female:22501male:8:93
1170	23105	Getting up in morning	Basal metabolic rate	8	9	0.000100757	0.191026	0.000311471	0.00437358	1	0.59696	1	0.000282228	0.0466741			1170female:23105male:8:9
1170	23105	Getting up in morning	Basal metabolic rate	10	11	2.86823e-05	0.56442	5.72652e-05	0.431347	-1	-1	-0.137114	1.73214e-06	0.0211376	ENSG00000151655.13,ENSG00000151657.7,ENSG00000165629.15,ENSG00000165632.7,ENSG00000107485.11	ITIH2,KIN,ATP5C1,TAF3,GATA3	1170female:23105male:10:11
1170	23105	Getting up in morning	Basal metabolic rate	15	25	5.20888e-05	0.237015	8.68249e-05	0.3206	-1	-1	-0.00950095	2.79663e-05	0.035163	ENSG00000186417.9,ENSG00000104093.9,ENSG00000104112.4,ENSG00000140280.9,ENSG00000128872.5,ENSG00000138594.8,ENSG00000166477.8,ENSG00000069956.7,ENSG00000137875.4,ENSG00000069966.14,ENSG00000128833.8,ENSG00000197535.10,ENSG00000128989.6,ENSG00000047346.8,ENSG00000169856.7	GLDN,DMXL2,SCG3,LYSMD2,TMOD2,TMOD3,LEO1,MAPK6,BCL2L10,GNB5,MYO5C,MYO5A,ARPP19,FAM214A,ONECUT1	1170female:23105male:15:25
1170	23105	Getting up in morning	Basal metabolic rate	16	34	0.000182016	0.0728409	0.00226656	5.2829e-17	0.813781	0.480948	1	3.3113e-05	0.035163	ENSG00000103479.10,ENSG00000166971.12,ENSG00000103494.8,ENSG00000140718.14,ENSG00000259517.1,ENSG00000177508.11	RBL2,AKTIP,RPGRIP1L,FTO,RP11-324D17.1,IRX3	1170female:23105male:16:34
1170	50	Getting up in morning	Standing height	4	31	3.27199e-05	0.0566773	4.28799e-05	0.414729	-1	-1	-0.019502	2.22626e-05	0.0340966	ENSG00000250038.1	RP11-180C1.1	1170female:50male:4:31
1170	50	Getting up in morning	Standing height	20	33	1.54182e-05	0.778281	0.000138965	0.0821036	-1	-1	-0.19692	0.000165686	0.0420477	ENSG00000166619.8,ENSG00000053438.7,ENSG00000132792.14,ENSG00000132821.7,ENSG00000101407.8,ENSG00000101413.7,ENSG00000198959.7,ENSG00000149633.7,ENSG00000101425.8,ENSG00000129988.5,ENSG00000170471.10,ENSG00000182035.7	BLCAP,NNAT,CTNNBL1,VSTM2L,TTI1,RPRD1B,TGM2,KIAA1755,BPI,LBP,RALGAPB,ADIG	1170female:50male:20:33
1170	I9_CHD	Getting up in morning	Major coronary heart disease event	3	160	2.92578e-05	0.630067	9.30823e-05	0.171654	1	0.172517	1	0.000104995	0.0391345	ENSG00000181449.2,ENSG00000058063.11,ENSG00000043093.9,ENSG00000078070.7,ENSG00000078081.3,ENSG00000053524.7,ENSG00000176597.7	SOX2,ATP11B,DCUN1D1,MCCC1,LAMP3,MCF2L2,B3GNT5	1170female:I9_CHDmale:3:160
1210	1299	Snoring	Salad / raw vegetable intake	1	140	4.25166e-05	0.268607	3.56808e-05	0.240261	1	0.152515	1	5.93972e-06	0.0277611	ENSG00000121481.6,ENSG00000121486.7,ENSG00000116668.8,ENSG00000116679.11,ENSG00000143341.7	RNF2,TRMT1L,SWT1,IVNS1ABP,HMCN1	1210female:1299male:1:140
1210	1299	Snoring	Salad / raw vegetable intake	7	60	6.67566e-05	0.125642	3.07437e-05	0.614342	-1	-1	-0.443744	9.18773e-05	0.0387952	ENSG00000132434.5,ENSG00000154978.8,ENSG00000154997.8,ENSG00000249773.3,ENSG00000178665.10,ENSG00000146729.5,ENSG00000239789.1,ENSG00000146733.9,ENSG00000146731.6,ENSG00000129103.13,ENSG00000164776.5,ENSG00000106153.12,ENSG00000185290.3	LANCL2,VOPP1,SEPT14,MRPS17,ZNF713,GBAS,MRPS17,PSPH,CCT6A,SUMF2,PHKG1,CHCHD2,NUPR1L	1210female:1299male:7:60
1210	1299	Snoring	Salad / raw vegetable intake	10	23	4.73013e-05	0.299028	7.27755e-05	0.209402	-1	-1	-0.510151	0.000184033	0.0426206			1210female:1299male:10:23
1210	1299	Snoring	Salad / raw vegetable intake	18	67	9.76623e-05	0.134069	7.91404e-05	0.227273	-1	-1	-0.346535	4.04842e-05	0.0363739	ENSG00000256463.4,ENSG00000166377.15	SALL3,ATP9B	1210female:1299male:18:67
1210	1299	Snoring	Salad / raw vegetable intake	21	25	9.67191e-05	0.0461024	0.000143209	0.00542894	-1	-1	-0.168117	0.000180874	0.0424901	ENSG00000183527.7,ENSG00000185658.9,ENSG00000205581.6,ENSG00000182093.10,ENSG00000157578.9,ENSG00000185437.9,ENSG00000183778.13,ENSG00000184809.8,ENSG00000183067.5,ENSG00000183036.6	PSMG1,BRWD1,HMGN1,WRB,LCA5L,SH3BGR,B3GALT5,C21orf88,IGSF5,PCP4	1210female:1299male:21:25
1210	1309	Snoring	Fresh fruit intake	2	25	0.00013042	0.0145568	0.000139177	0.0629108	1	0.346735	1	0.000106676	0.0391536	ENSG00000084674.9,ENSG00000218819.3	APOB,TDRD15	1210female:1309male:2:25
1210	1558	Snoring	Alcohol intake frequency.	5	94	5.89064e-05	0.198266	7.28594e-05	0.111562	-1	-1	-0.40134	1.08729e-05	0.0324382	ENSG00000164211.8,ENSG00000134986.9,ENSG00000129595.8,ENSG00000268358.1	STARD4,NREP,EPB41L4A,EPB41L4A-AS2	1210female:1558male:5:94
1210	1558	Snoring	Alcohol intake frequency.	6	18	4.74758e-05	0.492373	5.81593e-05	0.32694	1	0.40414	1	4.16969e-05	0.0363739	ENSG00000172201.6,ENSG00000172197.9	ID4,MBOAT1	1210female:1558male:6:18
1210	1558	Snoring	Alcohol intake frequency.	12	38	1.09296e-05	0.23856	4.638e-05	0.0597083	1	0.268127	1	6.86663e-05	0.0383365	ENSG00000175548.4	ALG10B	1210female:1558male:12:38
1210	1558	Snoring	Alcohol intake frequency.	20	34	6.25889e-05	0.148357	4.84041e-05	0.194391	1	0.0773077	1	5.70779e-05	0.0375025	ENSG00000101438.3,ENSG00000101442.8,ENSG00000101445.5,ENSG00000101447.9,ENSG00000101452.10	SLC32A1,ACTR5,PPP1R16B,FAM83D,DHX35	1210female:1558male:20:34
1210	20022	Snoring	Birth weight	20	35	0.000182308	0.0209829	0.000136302	0.5747	1	0.581358	1	0.000152154	0.0413449	ENSG00000204103.2,ENSG00000198900.5,ENSG00000124181.10,ENSG00000174306.17,ENSG00000132793.7,ENSG00000183798.4,ENSG00000124177.10	MAFB,TOP1,PLCG1,ZHX3,LPIN3,EMILIN3,CHD6	1210female:20022male:20:35
1210	20022	Snoring	Birth weight	20	46	8.13783e-05	0.115112	5.18445e-05	0.346477	-1	-1	-0.09951	2.48302e-05	0.0345359	ENSG00000020256.15	ZFP64	1210female:20022male:20:46
1210	20116_2	Snoring	Smoking status: Current	3	32	5.04444e-05	0.250652	2.40783e-05	0.455982	-1	-1	-0.332533	3.81944e-06	0.026118	ENSG00000153551.9,ENSG00000091317.7,ENSG00000144635.4,ENSG00000182973.14,ENSG00000206557.5,ENSG00000183813.6	CMTM7,CMTM6,DYNC1LI1,CNOT10,TRIM71,CCR4	1210female:20116_2male:3:32
1210	20116_2	Snoring	Smoking status: Current	8	38	7.88879e-05	0.0744515	1.49684e-05	0.856773	-1	-1	-0.29753	3.84225e-05	0.0362489	ENSG00000042980.8,ENSG00000134028.10,ENSG00000069206.11,ENSG00000104722.9	ADAM28,ADAMDEC1,ADAM7,NEFM	1210female:20116_2male:8:38
1210	20116_2	Snoring	Smoking status: Current	10	97	8.43823e-05	0.135404	0.000119827	0.0727037	-1	-1	-0.567157	1.03349e-06	0.0178477	ENSG00000120055.5,ENSG00000138111.10,ENSG00000138107.7,ENSG00000107882.7,ENSG00000171206.9,ENSG00000138175.8,ENSG00000156398.8,ENSG00000166272.12,ENSG00000148795.5,ENSG00000166275.11,ENSG00000270316.1,ENSG00000214435.3,ENSG00000148842.13,ENSG00000076685.14,ENSG00000235376.5,ENSG00000148798.5,ENSG00000156374.10,ENSG00000148835.9,ENSG00000173915.8,ENSG00000148843.9,ENSG00000138172.6,ENSG00000185933…	C10orf95,TMEM180,ACTR1A,SUFU,TRIM8,ARL3,SFXN2,WBP1L,CYP17A1,C10orf32,C10orf32-ASMT,AS3MT,CNNM2,NT5C2,RPEL1,INA,PCGF6,TAF5,USMG5,PDCD11,CALHM2,CALHM1,CALHM3,NEURL1,SH3PXD2A,OBFC1,SLK,COL17A1,SFR1,WDR96,GSTO1,GSTO2,ITPRIP	1210female:20116_2male:10:97
1210	2040	Snoring	Risk taking	4	88	6.71421e-05	0.0779374	5.79996e-05	0.196412	1	0.0735074	1	8.74276e-05	0.0387952	ENSG00000249049.1,ENSG00000248511.1	RP11-763F8.1,RP11-9B6.1	1210female:2040male:4:88
1210	20458	Snoring	General happiness	7	107	2.86024e-05	0.130821	6.01134e-05	0.270609	1	0.136714	1	5.71096e-05	0.0375025			1210female:20458male:7:107
1210	21001	Snoring	Body mass index (BMI)	3	80	8.889e-05	0.0442384	9.97401e-05	0.00160472	-1	-1	-0.288729	5.24338e-06	0.026979	ENSG00000184500.10,ENSG00000169379.11,ENSG00000178750.2,ENSG00000178700.3,ENSG00000178694.5	PROS1,ARL13B,STX19,DHFRL1,NSUN3	1210female:21001male:3:80
1210	21001	Snoring	Body mass index (BMI)	3	116	9.01162e-06	0.777514	0.000653495	2.10152e-06	-1	-1	-0.441744	0.000194003	0.0430424	ENSG00000014257.11	ACPP	1210female:21001male:3:116
1210	21001	Snoring	Body mass index (BMI)	4	3	7.41638e-05	0.032367	7.57833e-05	0.0687957	-1	-1	-0.425743	6.37864e-06	0.0280135	ENSG00000174137.8,ENSG00000163950.8,ENSG00000168936.6,ENSG00000013810.14,ENSG00000068078.13,ENSG00000168924.10,ENSG00000109685.13,ENSG00000185049.8,ENSG00000243449.2,ENSG00000185818.7,ENSG00000130997.12,ENSG00000214367.3,ENSG00000123933.10,ENSG00000159733.9	FAM53A,SLBP,TMEM129,TACC3,FGFR3,LETM1,WHSC1,NELFA,C4orf48,NAT8L,POLN,HAUS3,MXD4,ZFYVE28	1210female:21001male:4:3
1210	21001	Snoring	Body mass index (BMI)	13	56	6.1494e-06	0.915908	0.000187242	0.0910318	-1	-1	-0.107511	6.55531e-05	0.0381041	ENSG00000152192.6,ENSG00000152193.7	POU4F1,RNF219	1210female:21001male:13:56
1210	2139	Snoring	Age first had sexual intercourse	1	173	0.000136153	0.00731597	2.94701e-05	0.461245	-1	-1	-0.0133013	0.000132243	0.0405803	ENSG00000154305.12,ENSG00000186063.8,ENSG00000162819.7,ENSG00000197520.6,ENSG00000154309.7,ENSG00000187554.7,ENSG00000143502.10,ENSG00000178395.5	MIA3,AIDA,BROX,FAM177B,DISP1,TLR5,SUSD4,C1orf65	1210female:2139male:1:173
1210	2139	Snoring	Age first had sexual intercourse	18	31	3.08694e-05	0.363185	0.000169095	0.00643623	1	0.159916	1	0.000144215	0.0410177			1210female:2139male:18:31
1210	2139	Snoring	Age first had sexual intercourse	20	43	8.13697e-05	0.158996	0.000107845	0.082683	1	0.530353	1	0.000169749	0.0420477	ENSG00000124126.9,ENSG00000124198.8,ENSG00000124207.12,ENSG00000124214.15,ENSG00000124228.10,ENSG00000124201.10,ENSG00000158445.7,ENSG00000124212.5	PREX1,ARFGEF2,CSE1L,STAU1,DDX27,ZNFX1,KCNB1,PTGIS	1210female:2139male:20:43
1210	2207	Snoring	Wears glasses or contact lenses	4	47	2.88764e-05	0.504096	8.83399e-05	0.10319	-1	-1	-0.168717	0.000125243	0.0402744	ENSG00000109132.5,ENSG00000109133.8,ENSG00000182308.5,ENSG00000014824.9,ENSG00000188848.11	PHOX2B,TMEM33,DCAF4L1,SLC30A9,BEND4	1210female:2207male:4:47
1210	22501	Snoring	Year ended full time education	7	36	7.07177e-05	0.0735612	0.000190604	0.287479	1	0.314531	1	1.50992e-05	0.0328404	ENSG00000154678.12	PDE1C	1210female:22501male:7:36
1210	22501	Snoring	Year ended full time education	22	32	1.83129e-05	0.76519	0.000344829	0.319697	1	0.159716	1	0.000190517	0.0428134			1210female:22501male:22:32
1210	23105	Snoring	Basal metabolic rate	3	80	8.889e-05	0.0442384	7.08143e-05	0.00521487	-1	-1	-0.226323	5.1831e-05	0.0371522	ENSG00000184500.10,ENSG00000169379.11,ENSG00000178750.2,ENSG00000178700.3,ENSG00000178694.5	PROS1,ARL13B,STX19,DHFRL1,NSUN3	1210female:23105male:3:80
1210	23105	Snoring	Basal metabolic rate	3	135	4.4303e-05	0.227388	0.000216551	9.67218e-05	-1	-1	-0.532953	1.26304e-07	0.00536207	ENSG00000114790.8,ENSG00000174953.9,ENSG00000174948.5,ENSG00000196549.6	ARHGEF26,DHX36,GPR149,MME	1210female:23105male:3:135
1210	23105	Snoring	Basal metabolic rate	12	63	3.18229e-05	0.394257	0.000150373	0.00962849	-1	-1	-0.0937094	5.68108e-05	0.0375025	ENSG00000111530.8	CAND1	1210female:23105male:12:63
1210	50	Snoring	Standing height	4	177	8.22832e-05	0.272298	3.12269e-05	0.681336	-1	-1	-0.0667067	1.32958e-05	0.0328404	ENSG00000179059.5,ENSG00000179046.4,ENSG00000184108.3	ZFP42,TRIML2,TRIML1	1210female:50male:4:177
1210	50	Snoring	Standing height	5	3	2.66677e-05	0.631438	0.000190599	0.0368271	1	0.118912	1	5.97351e-05	0.0376397	ENSG00000164363.8,ENSG00000164362.14,ENSG00000049656.9,ENSG00000142319.14,ENSG00000153395.5,ENSG00000171421.8,ENSG00000145494.7,ENSG00000113430.5	SLC6A18,TERT,CLPTM1L,SLC6A3,LPCAT1,MRPL36,NDUFS6,IRX4	1210female:50male:5:3
1210	50	Snoring	Standing height	8	64	0.000109829	0	2.72117e-05	0.554477	1	0.0757076	1	9.24944e-05	0.0388465	ENSG00000169122.7,ENSG00000215114.3,ENSG00000167910.3,ENSG00000137575.7	FAM110B,UBXN2B,CYP7A1,SDCBP	1210female:50male:8:64
1210	50	Snoring	Standing height	14	45	5.75421e-05	0.0870211	0.000236205	0.000701529	-1	-1	-0.455746	3.79867e-06	0.026118	ENSG00000198133.4,ENSG00000054690.9,ENSG00000100564.4,ENSG00000081181.3,ENSG00000100568.6,ENSG00000258466.1,ENSG00000072042.8,ENSG00000139988.5,ENSG00000072121.11	TMEM229B,PLEKHH1,PIGH,ARG2,VTI1B,RP11-1012A1.4,RDH11,RDH12,ZFYVE26	1210female:50male:14:45
1210	50	Snoring	Standing height	20	45	7.74261e-05	0.207007	0.000156741	0	1	0.391139	1	5.41173e-06	0.0274259	ENSG00000124171.4,ENSG00000124243.13,ENSG00000101126.11,ENSG00000000419.8,ENSG00000124217.3,ENSG00000026559.9,ENSG00000101096.15,ENSG00000054793.9,ENSG00000101115.8	PARD6B,BCAS4,ADNP,DPM1,MOCS3,KCNG1,NFATC2,ATP9A,SALL4	1210female:50male:20:45
1210	924	Snoring	Usual walking pace	5	63	8.52892e-05	0.0919827	7.78663e-05	0.00389991	1	0.233923	1	5.12341e-05	0.0371427	ENSG00000176928.4,ENSG00000145700.5,ENSG00000113161.11,ENSG00000113163.11,ENSG00000122008.11,ENSG00000189045.9,ENSG00000152359.10	GCNT4,ANKRD31,HMGCR,COL4A3BP,POLK,ANKDD1B,POC5	1210female:924male:5:63
1210	924	Snoring	Usual walking pace	11	31	0.000136315	0.0855009	3.56969e-05	0.537214	1	0.120912	1	2.22114e-05	0.0340966	ENSG00000129151.4,ENSG00000109881.12,ENSG00000205213.9,ENSG00000148943.7,ENSG00000176697.14,ENSG00000121621.6,ENSG00000169519.15	BBOX1,CCDC34,LGR4,LIN7C,BDNF,KIF18A,METTL15	1210female:924male:11:31
1210	I9_CHD	Snoring	Major coronary heart disease event	5	35	0.000126276	0.193139	3.73628e-05	0.644328	1	0.333933	1	0.000256056	0.0456486	ENSG00000164318.13,ENSG00000113594.5,ENSG00000145623.8,ENSG00000164327.8,ENSG00000082074.11,ENSG00000269215.1,ENSG00000113600.6	EGFLAM,LIFR,OSMR,RICTOR,FYB,AC008964.1,C9	1210female:I9_CHDmale:5:35
1210	I9_CHD	Snoring	Major coronary heart disease event	20	6	6.06865e-05	0.145057	2.68716e-05	0.425786	-1	-1	-0.253725	6.45457e-06	0.0281731	ENSG00000171867.12,ENSG00000171864.4,ENSG00000180259.5,ENSG00000101265.11,ENSG00000089057.10,ENSG00000089063.10,ENSG00000132646.6,ENSG00000101290.9,ENSG00000101292.6	PRNP,PRND,PRNT,RASSF2,SLC23A2,TMEM230,PCNA,CDS2,PROKR2	1210female:I9_CHDmale:20:6
1210	II_NEOPLASM	Snoring	Neoplasms	13	78	8.18587e-05	0.125697	1.78045e-05	0.760372	-1	-1	-0.260526	1.78251e-05	0.0331133	ENSG00000102452.11,ENSG00000198542.9	NALCN,ITGBL1	1210female:II_NEOPLASMmale:13:78
1210	20002_1286	Snoring	Depression	5	95	3.89032e-05	0	3.56858e-05	0.180743	-1	-1	-0.0955096	0.000167288	0.0420477	ENSG00000134982.12,ENSG00000258864.1,ENSG00000272869.1,ENSG00000153037.8,ENSG00000129625.8,ENSG00000212643.1,ENSG00000172795.11,ENSG00000171444.13,ENSG00000212122.3,ENSG00000047188.11	APC,CTC-554D6.1,CTC-487M23.8,SRP19,REEP5,ZRSR1,DCP2,MCC,TSSK1B,YTHDC2	1210female:20002_1286male:5:95
1210	20002_1291	Snoring	Mania/Bipolar disorder	17	38	0.000209593	0.0541274	5.79548e-05	0.38751	-1	-1	-0.49815	3.66381e-05	0.0359636	ENSG00000064300.4,ENSG00000182575.7,ENSG00000121067.13,ENSG00000121073.9,ENSG00000121104.3,ENSG00000136504.7,ENSG00000176358.11,ENSG00000108813.9,ENSG00000064195.7,ENSG00000005884.13,ENSG00000005882.7,ENSG00000167100.10,ENSG00000108819.9,ENSG00000108823.11,ENSG00000108821.9,ENSG00000167105.3,ENSG00000015532.5,ENSG00000108826.11,ENSG00000154920.10,ENSG00000108829.9,ENSG00000167107.8,ENSG0000013645…	NGFR,NXPH3,SPOP,SLC35B1,FAM117A,KAT7,TAC4,DLX4,DLX3,ITGA3,PDK2,SAMD14,PPP1R9B,SGCA,COL1A1,TMEM92,XYLT2,MRPL27,EME1,LRRC59,ACSF2,CHAD,RSAD1,MYCBPAP,EPN3,SPATA20,CACNA1G	1210female:20002_1291male:17:38
1299	1309	Salad / raw vegetable intake	Fresh fruit intake	9	72	1.38085e-05	0.488657	8.38617e-05	0.0423042	1	0.0559056	1	1.24897e-05	0.0328404	ENSG00000165233.13,ENSG00000131669.5,ENSG00000165238.12,ENSG00000204352.2,ENSG00000188938.11,ENSG00000048828.12,ENSG00000197724.6	C9orf89,NINJ1,WNK2,C9orf129,FAM120AOS,FAM120A,PHF2	1299female:1309male:9:72
1299	1309	Salad / raw vegetable intake	Fresh fruit intake	16	37	6.7983e-05	0.533777	0.000106626	0.210626	-1	-1	-0.377138	0.000137805	0.0407291	ENSG00000172775.12,ENSG00000159579.9,ENSG00000102931.3,ENSG00000102934.5,ENSG00000102962.4,ENSG00000006210.6,ENSG00000102970.6,ENSG00000005194.10,ENSG00000088682.9,ENSG00000102978.8,ENSG00000125170.6,ENSG00000135736.5,ENSG00000159618.11,ENSG00000205336.7,ENSG00000182885.12,ENSG00000159625.10,ENSG00000140854.8,ENSG00000140859.11,ENSG00000187185.3,ENSG00000070729.9,ENSG00000159648.7,ENSG00000166188…	FAM192A,RSPRY1,ARL2BP,PLLP,CCL22,CX3CL1,CCL17,CIAPIN1,COQ9,POLR2C,DOK4,CCDC102A,GPR114,GPR56,GPR97,CCDC135,KATNB1,KIFC3,CTD-2600O9.1,CNGB1,TEPP,ZNF319,USB1,MMP15,C16orf80,CSNK2A2,CCDC113,PRSS54,GINS3	1299female:1309male:16:37
1299	1309	Salad / raw vegetable intake	Fresh fruit intake	18	49	5.83483e-05	0.143296	0.00018362	0.0456069	1	0.645165	1	0.000107782	0.0392644	ENSG00000166603.3	MC4R	1299female:1309male:18:49
1299	1558	Salad / raw vegetable intake	Alcohol intake frequency.	4	67	7.81312e-05	0.194881	0.000116589	0.0788546	-1	-1	-0.190119	1.58786e-05	0.0328404			1299female:1558male:4:67
1299	1558	Salad / raw vegetable intake	Alcohol intake frequency.	5	117	6.55883e-05	0	0.000118592	0.308813	-1	-1	-0.117112	0.000277271	0.0465263	ENSG00000146021.10,ENSG00000177733.4,ENSG00000120729.5,ENSG00000078795.12,ENSG00000031003.6,ENSG00000061492.7,ENSG00000112981.3,ENSG00000112983.13,ENSG00000112984.7,ENSG00000094880.6,ENSG00000146013.6,ENSG00000158402.14,ENSG00000120709.6,ENSG00000120733.9,ENSG00000132563.11,ENSG00000120738.7,ENSG00000120705.8,ENSG00000113013.8,ENSG00000044115.16,ENSG00000146006.7,ENSG00000120725.8,ENSG00000015479…	KLHL3,HNRNPA0,MYOT,PKD2L2,FAM13B,WNT8A,NME5,BRD8,KIF20A,CDC23,GFRA3,CDC25C,FAM53C,KDM3B,REEP2,EGR1,ETF1,HSPA9,CTNNA1,LRRTM2,SIL1,MATR3,PAIP2,SLC23A1,MZB1,PROB1,SPATA24,DNAJC18,ECSCR,AC138517.1,TMEM173,UBE2D2,CXXC5,PSD2	1299female:1558male:5:117
1299	1558	Salad / raw vegetable intake	Alcohol intake frequency.	12	13	4.83464e-05	0.425025	4.42814e-05	0	-1	-1	-0.29973	8.55211e-05	0.0387952	ENSG00000139083.6,ENSG00000121380.8,ENSG00000070018.4,ENSG00000111261.9,ENSG00000205791.2,ENSG00000165714.6,ENSG00000111266.4	ETV6,BCL2L14,LRP6,MANSC1,LOH12CR2,LOH12CR1,DUSP16	1299female:1558male:12:13
1299	1558	Salad / raw vegetable intake	Alcohol intake frequency.	17	4	0.00011584	0.0128443	0.000120532	0.0341807	1	0.447745	1	2.63463e-05	0.0347075	ENSG00000262628.1,ENSG00000184166.1,ENSG00000183024.3,ENSG00000172150.4,ENSG00000172146.1,ENSG00000221882.2,ENSG00000180090.3,ENSG00000180016.2,ENSG00000159961.1,ENSG00000127780.3,ENSG00000141255.8,ENSG00000108381.6	OR1D5,OR1D2,OR1G1,OR1A2,OR1A1,OR3A2,OR3A1,OR1E1,OR3A3,OR1E2,SPATA22,ASPA	1299female:1558male:17:4
1299	20116_2	Salad / raw vegetable intake	Smoking status: Current	3	18	6.17617e-05	0.248437	7.62042e-05	0.247014	1	0.277528	1	0.000327183	0.0487585	ENSG00000131386.13,ENSG00000154813.5,ENSG00000154814.9,ENSG00000131378.9,ENSG00000092345.9,ENSG00000154822.11	GALNT15,DPH3,OXNAD1,RFTN1,DAZL,PLCL2	1299female:20116_2male:3:18
1299	20458	Salad / raw vegetable intake	General happiness	1	22	9.98747e-06	0.845504	0.000430476	0.0599214	-1	-1	-0.144714	9.51818e-07	0.0174876	ENSG00000158816.11,ENSG00000162545.5,ENSG00000090432.5,ENSG00000183114.6,ENSG00000158825.5,ENSG00000158828.5,ENSG00000244038.5,ENSG00000117245.8,ENSG00000189410.7,ENSG00000127483.13	VWA5B1,CAMK2N1,MUL1,FAM43B,CDA,PINK1,DDOST,KIF17,SH2D5,HP1BP3	1299female:20458male:1:22
1299	20458	Salad / raw vegetable intake	General happiness	4	47	8.34805e-05	0.0586433	9.57745e-05	0.279911	1	0.137714	1	4.14612e-06	0.0262747	ENSG00000109132.5,ENSG00000109133.8,ENSG00000182308.5,ENSG00000014824.9,ENSG00000188848.11	PHOX2B,TMEM33,DCAF4L1,SLC30A9,BEND4	1299female:20458male:4:47
1299	20458	Salad / raw vegetable intake	General happiness	11	15	3.01591e-05	0.716158	0.000271548	0.266386	1	0.112311	1	0.00029642	0.0473326	ENSG00000268242.1,ENSG00000170242.13,ENSG00000050165.13,ENSG00000133816.9,ENSG00000133808.4	AC131935.1,USP47,DKK3,MICAL2,MICALCL	1299female:20458male:11:15
1299	2139	Salad / raw vegetable intake	Age first had sexual intercourse	11	15	3.01591e-05	0.716158	5.86527e-05	0.269353	-1	-1	-0.137914	0.00024195	0.0451585	ENSG00000268242.1,ENSG00000170242.13,ENSG00000050165.13,ENSG00000133816.9,ENSG00000133808.4	AC131935.1,USP47,DKK3,MICAL2,MICALCL	1299female:2139male:11:15
1299	2139	Salad / raw vegetable intake	Age first had sexual intercourse	15	64	0.00012492	0.0298625	0.000115392	0.140396	1	0.50415	1	7.54408e-07	0.016367	ENSG00000251209.3,ENSG00000140450.7	LINC00923,ARRDC4	1299female:2139male:15:64
1299	2149	Salad / raw vegetable intake	Lifetime number of sexual partners	4	129	4.69556e-05	0.340749	4.45335e-05	0.508186	1	0.0457046	1	4.29398e-06	0.0262747			1299female:2149male:4:129
1299	2149	Salad / raw vegetable intake	Lifetime number of sexual partners	10	97	0.000100143	0.00140795	0.000151351	3.18854e-05	-1	-1	-0.732573	1.63003e-07	0.00633252	ENSG00000120055.5,ENSG00000138111.10,ENSG00000138107.7,ENSG00000107882.7,ENSG00000171206.9,ENSG00000138175.8,ENSG00000156398.8,ENSG00000166272.12,ENSG00000148795.5,ENSG00000166275.11,ENSG00000270316.1,ENSG00000214435.3,ENSG00000148842.13,ENSG00000076685.14,ENSG00000235376.5,ENSG00000148798.5,ENSG00000156374.10,ENSG00000148835.9,ENSG00000173915.8,ENSG00000148843.9,ENSG00000138172.6,ENSG00000185933…	C10orf95,TMEM180,ACTR1A,SUFU,TRIM8,ARL3,SFXN2,WBP1L,CYP17A1,C10orf32,C10orf32-ASMT,AS3MT,CNNM2,NT5C2,RPEL1,INA,PCGF6,TAF5,USMG5,PDCD11,CALHM2,CALHM1,CALHM3,NEURL1,SH3PXD2A,OBFC1,SLK,COL17A1,SFR1,WDR96,GSTO1,GSTO2,ITPRIP	1299female:2149male:10:97
1299	22501	Salad / raw vegetable intake	Year ended full time education	17	64	0.000138013	0.00729324	5.64249e-05	0.652865	1	0.207321	1	2.00723e-06	0.0211376	ENSG00000263053.3,ENSG00000171282.9,ENSG00000184009.5,ENSG00000186765.7,ENSG00000185504.12,ENSG00000182446.9,ENSG00000185527.7,ENSG00000204237.4,ENSG00000185298.8,ENSG00000214087.4,ENSG00000185359.8,ENSG00000262814.2,ENSG00000262660.1,ENSG00000183048.7,ENSG00000215644.5,ENSG00000225663.3,ENSG00000215621.2,ENSG00000182676.4,ENSG00000185624.10,ENSG00000141522.7,ENSG00000183684.6,ENSG00000141552.13,…	RP11-1055B8.6,RP11-1055B8.7,ACTG1,FSCN2,C17orf70,NPLOC4,PDE6G,OXLD1,CCDC137,ARL16,HGS,MRPL12,SLC25A10,SLC25A10,GCGR,FAM195B,AC174470.1,PPP1R27,P4HB,ARHGDIA,ALYREF,ANAPC11,NPB,PCYT2,SIRT7,MAFG,PYCR1,MYADML2,NOTUM,ASPSCR1,STRA13,LRRC45,RAC3,DCXR,RFNG,GPS1,DUS1L,FASN,CCDC57,SLC16A3,CSNK1D,AC132872.2,CD7,SECTM1,TEX19,UTS2R,OGFOD3,HEXDC,C17orf62,NARF	1299female:22501male:17:64
1299	23105	Salad / raw vegetable intake	Basal metabolic rate	2	78	6.08786e-05	0.171379	0.00014465	0.0798226	1	0.561556	1	2.01234e-06	0.0211376	ENSG00000003137.4,ENSG00000144036.10,ENSG00000116096.5,ENSG00000135638.9,ENSG00000144040.8,ENSG00000135631.11,ENSG00000214513.3,ENSG00000135632.7,ENSG00000135617.3,ENSG00000135624.11,ENSG00000163013.7,ENSG00000135625.6	CYP26B1,EXOC6B,SPR,EMX1,SFXN5,RAB11FIP5,NOTO,SMYD5,PRADC1,CCT7,FBXO41,EGR4	1299female:23105male:2:78
1299	23105	Salad / raw vegetable intake	Basal metabolic rate	15	20	7.27265e-05	0.051572	0.000102223	0.00640651	1	0.70077	1	9.61151e-07	0.0174876			1299female:23105male:15:20
1299	3526	Salad / raw vegetable intake	Mother's age at death	21	18	5.82724e-05	0.264419	4.22089e-05	0.765887	-1	-1	-0.205721	0.000204479	0.0436374	ENSG00000182591.4,ENSG00000206102.2,ENSG00000156299.8,ENSG00000142168.10,ENSG00000156304.10	KRTAP11-1,KRTAP19-8,TIAM1,SOD1,SCAF4	1299female:3526male:21:18
1299	50	Salad / raw vegetable intake	Standing height	7	97	3.82702e-05	0.21922	7.95056e-05	0.0909391	1	0.143714	1	0.000196405	0.0431981	ENSG00000005483.15,ENSG00000135250.12,ENSG00000091127.9,ENSG00000135249.3,ENSG00000185055.6	KMT2E,SRPK2,PUS7,RINT1,EFCAB10	1299female:50male:7:97
1299	924	Salad / raw vegetable intake	Usual walking pace	12	101	3.62705e-05	0.541381	2.47952e-05	0.534765	-1	-1	-0.0675068	2.57558e-05	0.0346708	ENSG00000139438.5,ENSG00000111199.6,ENSG00000139433.5,ENSG00000139437.13,ENSG00000139436.16,ENSG00000076513.12,ENSG00000174456.9,ENSG00000122970.11,ENSG00000174437.12,ENSG00000196510.8,ENSG00000111229.11,ENSG00000111231.4,ENSG00000204856.7,ENSG00000111237.14,ENSG00000151164.14,ENSG00000196850.4,ENSG00000204852.11,ENSG00000122986.9,ENSG00000186298.7,ENSG00000173093.8,ENSG00000111245.10	FAM222A,TRPV4,GLTP,TCHP,GIT2,ANKRD13A,C12orf76,IFT81,ATP2A2,ANAPC7,ARPC3,GPN3,FAM216A,VPS29,RAD9B,PPTC7,TCTN1,HVCN1,PPP1CC,CCDC63,MYL2	1299female:924male:12:101
1299	II_NEOPLASM	Salad / raw vegetable intake	Neoplasms	18	65	3.90481e-05	0.429603	3.76266e-05	0.43132	-1	-1	-0.0513051	4.15838e-05	0.0363739	ENSG00000264278.1,ENSG00000130856.11,ENSG00000197971.10,ENSG00000166573.4	RP11-162A12.2,ZNF236,MBP,GALR1	1299female:II_NEOPLASMmale:18:65
1299	20002_1223	Salad / raw vegetable intake	Type 2 diabetes	20	2	6.2409e-05	0.565557	0.000133082	0.0564854	-1	-1	-0.252725	0.000106279	0.0391345	ENSG00000101282.4,ENSG00000125818.13,ENSG00000125895.5,ENSG00000215595.1,ENSG00000244588.1,ENSG00000101298.9,ENSG00000125775.10,ENSG00000203630.3,ENSG00000088832.10,ENSG00000088833.13,ENSG00000196209.8,ENSG00000125900.8,ENSG00000260861.2,ENSG00000101307.11,ENSG00000089012.10	RSPO4,PSMF1,TMEM74B,C20orf202,RAD21L1,SNPH,SDCBP2,AL136531.1,FKBP1A,NSFL1C,SIRPB2,SIRPD,RP4-576H24.4,SIRPB1,SIRPG	1299female:20002_1223male:20:2
1299	20002_1286	Salad / raw vegetable intake	Depression	14	17	8.24499e-05	0.0399429	4.54219e-05	0.063275	1	0.0475048	1	0.000130526	0.0405803	ENSG00000258708.1,ENSG00000151338.14,ENSG00000129514.4,ENSG00000139865.12,ENSG00000139874.5	SLC25A21-AS1,MIPOL1,FOXA1,TTC6,SSTR1	1299female:20002_1286male:14:17
1309	1558	Fresh fruit intake	Alcohol intake frequency.	2	49	0.00025738	0.0140788	0.000236514	0.133411	0.933393	0.588559	1	0.00027596	0.0464364	ENSG00000138095.14,ENSG00000138032.16,ENSG00000138079.9,ENSG00000138078.11,ENSG00000143919.10,ENSG00000138083.3	LRPPRC,PPM1B,SLC3A1,PREPL,CAMKMT,SIX3	1309female:1558male:2:49
1309	1558	Fresh fruit intake	Alcohol intake frequency.	3	60	0.000106367	0	2.19297e-05	0.77425	-1	-1	-0.0149015	4.2411e-05	0.0363739			1309female:1558male:3:60
1309	1558	Fresh fruit intake	Alcohol intake frequency.	9	20	7.99485e-05	0.205977	0.000123311	0.141314	-1	-1	-0.451745	0.00012969	0.0405803	ENSG00000175893.7,ENSG00000147869.4	ZDHHC21,CER1	1309female:1558male:9:20
1309	20022	Fresh fruit intake	Birth weight	1	198	7.81885e-05	0.437686	0.000140827	0.183686	-1	-1	-0.113111	0.000108219	0.0392644	ENSG00000162851.6,ENSG00000162852.9,ENSG00000143653.9,ENSG00000153207.10,ENSG00000197472.10,ENSG00000135747.7,ENSG00000188295.10,ENSG00000221953.2,ENSG00000196418.8,ENSG00000162714.8	TFB2M,CNST,SCCPDH,AHCTF1,ZNF695,ZNF670,ZNF669,C1orf229,ZNF124,ZNF496	1309female:20022male:1:198
1309	20022	Fresh fruit intake	Birth weight	20	61	3.48559e-05	0.577317	0.00012179	0.292832	1	0.0777078	1	0.000131173	0.0405803	ENSG00000125531.5,ENSG00000130589.12,ENSG00000101216.6,ENSG00000197457.5,ENSG00000258366.3,ENSG00000026036.16,ENSG00000243509.4,ENSG00000101246.15,ENSG00000197114.7,ENSG00000273154.1,ENSG00000203896.5,ENSG00000273047.1,ENSG00000125520.9,ENSG00000130584.6,ENSG00000269223.1,ENSG00000183260.5,ENSG00000268858.1,ENSG00000101150.13,ENSG00000101152.6,ENSG00000198276.9,ENSG00000267848.1,ENSG00000196700.3…	C20orf195,HELZ2,GMEB2,STMN3,RTEL1,RTEL1-TNFRSF6B,TNFRSF6B,ARFRP1,ZGPAT,RP4-583P15.15,LIME1,RP4-583P15.14,SLC2A4RG,ZBTB46,AL158091.1,ABHD16B,C20ORF135,TPD52L2,DNAJC5,UCKL1,AL118506.1,ZNF512B,SAMD10,PRPF6,SOX18,TCEA2,RGS19,OPRL1,C20orf201,NPBWR2,MYT1	1309female:20022male:20:61
1309	20116_2	Fresh fruit intake	Smoking status: Current	18	26	3.98694e-05	0	4.84061e-05	0.355076	-1	-1	-0.141514	0.00022661	0.044504	ENSG00000166960.12,ENSG00000141431.5,ENSG00000101746.11	CCDC178,ASXL3,NOL4	1309female:20116_2male:18:26
1309	21001	Fresh fruit intake	Body mass index (BMI)	1	145	0.000164387	0.0163492	0.000209129	0	-1	-1	-0.731573	0.000136515	0.0407063	ENSG00000162670.8	BRINP3	1309female:21001male:1:145
1309	21001	Fresh fruit intake	Body mass index (BMI)	2	1	0.000122178	0.131219	0.00117733	0.00010096	1	0.791779	1	3.64281e-06	0.0255974	ENSG00000184731.5,ENSG00000035115.17,ENSG00000143727.11,ENSG00000189292.11,ENSG00000151353.10	FAM110C,SH3YL1,ACP1,FAM150B,TMEM18	1309female:21001male:2:1
1309	21001	Fresh fruit intake	Body mass index (BMI)	2	214	0.00012986	0.0142998	5.31317e-05	0.189288	1	0.641564	1	3.23746e-05	0.035163	ENSG00000132321.12,ENSG00000144476.5,ENSG00000198612.6,ENSG00000224132.2	IQCA1,ACKR3,COPS8,AC112715.2	1309female:21001male:2:214
1309	21001	Fresh fruit intake	Body mass index (BMI)	3	80	1.61689e-05	0.307514	9.97401e-05	0.00160472	-1	-1	-0.0477048	5.18839e-06	0.026979	ENSG00000184500.10,ENSG00000169379.11,ENSG00000178750.2,ENSG00000178700.3,ENSG00000178694.5	PROS1,ARL13B,STX19,DHFRL1,NSUN3	1309female:21001male:3:80
1309	21001	Fresh fruit intake	Body mass index (BMI)	5	128	0.000157137	0.0279495	0.000358776	0.00775626	-1	-1	-0.653765	0.000199266	0.0433085	ENSG00000055147.13,ENSG00000037749.7	FAM114A2,MFAP3	1309female:21001male:5:128
1309	21001	Fresh fruit intake	Body mass index (BMI)	7	72	4.18477e-05	0	9.12037e-05	0.292731	1	0.266327	1	4.40248e-06	0.0262747	ENSG00000183166.6,ENSG00000196313.7,ENSG00000155428.8,ENSG00000267985.1,ENSG00000130305.12,ENSG00000146755.6,ENSG00000077800.7,ENSG00000188763.3,ENSG00000009954.6,ENSG00000106635.3,ENSG00000106638.11,ENSG00000009950.11,ENSG00000176428.5,ENSG00000176410.7,ENSG00000071462.7	CALN1,POM121,TRIM74,AC005488.1,NSUN5,TRIM50,FKBP6,FZD9,BAZ1B,BCL7B,TBL2,MLXIPL,VPS37D,DNAJC30,WBSCR22	1309female:21001male:7:72
1309	21001	Fresh fruit intake	Body mass index (BMI)	8	19	5.9113e-05	0.00660288	0.000169232	2.37699e-05	1	0.526353	1	6.93882e-07	0.0160848	ENSG00000171060.6,ENSG00000171056.6,ENSG00000258724.1,ENSG00000254093.4,ENSG00000171044.6,ENSG00000215346.3,ENSG00000104643.5,ENSG00000177710.5,ENSG00000184608.4,ENSG00000154319.10,ENSG00000136573.8	C8orf74,SOX7,SOX7,PINX1,XKR6,AF131215.5,MTMR9,SLC35G5,C8orf12,FAM167A,BLK	1309female:21001male:8:19
1309	21001	Fresh fruit intake	Body mass index (BMI)	19	46	0.000139203	0.221827	2.28758e-05	0.814337	-1	-1	-0.469747	2.40196e-06	0.0223794	ENSG00000216588.4,ENSG00000073008.10,ENSG00000186567.8,ENSG00000213892.6,ENSG00000069399.8,ENSG00000142273.6,ENSG00000187244.6,ENSG00000130202.5,ENSG00000130204.8,ENSG00000130203.5,ENSG00000130208.5,ENSG00000267467.2,ENSG00000224916.4,ENSG00000234906.4,ENSG00000267114.1,ENSG00000104853.11,ENSG00000104856.9,ENSG00000104859.10,ENSG00000170684.4,ENSG00000142252.6,ENSG00000007047.10,ENSG00000104866.6…	IGSF23,PVR,CEACAM19,CEACAM16,BCL3,CBLC,BCAM,PVRL2,TOMM40,APOE,APOC1,APOC4,APOC4-APOC2,APOC2,CTB-129P6.11,CLPTM1,RELB,CLASRP,ZNF296,GEMIN7,MARK4,PPP1R37,NKPD1,TRAPPC6A,BLOC1S3,AC005779.2,AC006126.3,EXOC3L2,CKM,KLC3,L47234.1,ERCC2	1309female:21001male:19:46
1309	21001	Fresh fruit intake	Body mass index (BMI)	20	39	9.51481e-05	0.0688582	0.000350738	0.00587481	-1	-1	-0.717572	6.23224e-05	0.0378636	ENSG00000168746.6,ENSG00000124120.6,ENSG00000132824.9,ENSG00000168734.9,ENSG00000269605.1,ENSG00000196839.8,ENSG00000064205.6,ENSG00000124249.5,ENSG00000101098.8,ENSG00000166913.8,ENSG00000101104.8,ENSG00000025772.7,ENSG00000101109.7,ENSG00000124134.4,ENSG00000175121.7,ENSG00000168703.5,ENSG00000124102.4,ENSG00000124233.10,ENSG00000124157.6,ENSG00000124107.5,ENSG00000124159.11,ENSG00000124232.6,E…	C20orf62,TTPAL,SERINC3,PKIG,Z97053.1,ADA,WISP2,KCNK15,RIMS4,YWHAB,PABPC1L,TOMM34,STK4,KCNS1,WFDC5,WFDC12,PI3,SEMG1,SEMG2,SLPI,MATN4,RBPJL,SDC4,SYS1,SYS1-DBNDD2,TP53TG5,DBNDD2,PIGT	1309female:21001male:20:39
1309	2139	Fresh fruit intake	Age first had sexual intercourse	2	46	7.17541e-05	0.128787	4.86622e-05	0.193283	1	0.271927	1	2.87304e-05	0.035163			1309female:2139male:2:46
1309	2139	Fresh fruit intake	Age first had sexual intercourse	8	20	5.82226e-05	0.0365902	0.000185666	6.77965e-05	-1	-1	-0.268727	4.45439e-05	0.0363745			1309female:2139male:8:20
1309	2139	Fresh fruit intake	Age first had sexual intercourse	8	138	5.44316e-05	0.0538446	3.33743e-05	0.568249	-1	-1	-0.442344	0.000239	0.0449786			1309female:2139male:8:138
1309	2139	Fresh fruit intake	Age first had sexual intercourse	17	23	8.29855e-05	0.15823	4.86351e-05	0.51169	-1	-1	-0.231723	2.06435e-05	0.0338278			1309female:2139male:17:23
1309	2139	Fresh fruit intake	Age first had sexual intercourse	17	49	2.43483e-05	0.435526	7.55313e-05	0.101809	-1	-1	-0.00890089	1.65358e-05	0.0328404	ENSG00000154240.12,ENSG00000091583.6	CEP112,APOH	1309female:2139male:17:49
1309	2149	Fresh fruit intake	Lifetime number of sexual partners	1	62	0.000217372	0.0551732	8.72361e-05	0.106535	1	0.541354	1	5.23635e-06	0.026979			1309female:2149male:1:62
1309	2149	Fresh fruit intake	Lifetime number of sexual partners	8	15	5.9515e-05	0.0102434	6.73923e-05	0.042862	1	0.374137	1	1.08882e-05	0.0324382			1309female:2149male:8:15
1309	2149	Fresh fruit intake	Lifetime number of sexual partners	12	36	3.94666e-05	0.130042	5.31976e-05	0	1	0.260926	1	3.275e-05	0.035163			1309female:2149male:12:36
1309	2149	Fresh fruit intake	Lifetime number of sexual partners	14	46	0.000172162	0.0135354	4.09209e-05	0.701696	1	0.253325	1	5.7268e-05	0.0375025			1309female:2149male:14:46
1309	2207	Fresh fruit intake	Wears glasses or contact lenses	14	10	4.96579e-05	0.555313	0.000134777	0.172005	1	0.528753	1	0.000128768	0.0405565			1309female:2207male:14:10
1309	22501	Fresh fruit intake	Year ended full time education	6	79	6.65228e-05	0.00767119	6.50512e-05	0.360341	1	0.0489049	1	1.35048e-05	0.0328404			1309female:22501male:6:79
1309	22501	Fresh fruit intake	Year ended full time education	7	17	3.33105e-05	0	0.00029013	0.0699384	1	0.373737	1	1.28443e-05	0.0328404			1309female:22501male:7:17
1309	23105	Fresh fruit intake	Basal metabolic rate	2	1	0.000122178	0.131219	0.00112467	0.000260474	1	0.781778	1	7.84017e-06	0.0298892	ENSG00000184731.5,ENSG00000035115.17,ENSG00000143727.11,ENSG00000189292.11,ENSG00000151353.10	FAM110C,SH3YL1,ACP1,FAM150B,TMEM18	1309female:23105male:2:1
1309	23105	Fresh fruit intake	Basal metabolic rate	2	78	7.56749e-05	0.1616	0.00014465	0.0798226	1	0.159916	1	3.6898e-05	0.0360156	ENSG00000003137.4,ENSG00000144036.10,ENSG00000116096.5,ENSG00000135638.9,ENSG00000144040.8,ENSG00000135631.11,ENSG00000214513.3,ENSG00000135632.7,ENSG00000135617.3,ENSG00000135624.11,ENSG00000163013.7,ENSG00000135625.6	CYP26B1,EXOC6B,SPR,EMX1,SFXN5,RAB11FIP5,NOTO,SMYD5,PRADC1,CCT7,FBXO41,EGR4	1309female:23105male:2:78
1309	23105	Fresh fruit intake	Basal metabolic rate	3	80	1.61689e-05	0.307514	7.08143e-05	0.00521487	-1	-1	-0.349735	5.7062e-06	0.0275544	ENSG00000184500.10,ENSG00000169379.11,ENSG00000178750.2,ENSG00000178700.3,ENSG00000178694.5	PROS1,ARL13B,STX19,DHFRL1,NSUN3	1309female:23105male:3:80
1309	23105	Fresh fruit intake	Basal metabolic rate	8	19	5.9113e-05	0.00660288	0.000161218	7.8966e-05	1	0.624762	1	0.00010482	0.0391345	ENSG00000171060.6,ENSG00000171056.6,ENSG00000258724.1,ENSG00000254093.4,ENSG00000171044.6,ENSG00000215346.3,ENSG00000104643.5,ENSG00000177710.5,ENSG00000184608.4,ENSG00000154319.10,ENSG00000136573.8	C8orf74,SOX7,SOX7,PINX1,XKR6,AF131215.5,MTMR9,SLC35G5,C8orf12,FAM167A,BLK	1309female:23105male:8:19
1309	23105	Fresh fruit intake	Basal metabolic rate	11	31	4.02866e-05	0.28467	0.000799577	0.000177839	1	0.645965	1	0.000244964	0.0452317	ENSG00000129151.4,ENSG00000109881.12,ENSG00000205213.9,ENSG00000148943.7,ENSG00000176697.14,ENSG00000121621.6,ENSG00000169519.15	BBOX1,CCDC34,LGR4,LIN7C,BDNF,KIF18A,METTL15	1309female:23105male:11:31
1309	23105	Fresh fruit intake	Basal metabolic rate	16	48	3.29715e-05	0.292151	0.000150193	0.0863993	-1	-1	-0.351335	1.27895e-06	0.0191633	ENSG00000180917.12,ENSG00000172137.14,ENSG00000167377.13,ENSG00000261611.3,ENSG00000157429.11,ENSG00000140835.8,ENSG00000198650.6,ENSG00000140832.5,ENSG00000040199.14,ENSG00000166747.8,ENSG00000224470.3,ENSG00000182149.16,ENSG00000102984.10,ENSG00000102967.7	CMTR2,CALB2,ZNF23,AC010547.9,ZNF19,CHST4,TAT,MARVELD3,PHLPP2,AP1G1,ATXN1L,IST1,ZNF821,DHODH	1309female:23105male:16:48
1309	3526	Fresh fruit intake	Mother's age at death	2	37	2.91135e-05	0.206583	4.22213e-05	0.501647	1	0.0115012	1	1.09986e-05	0.0325767			1309female:3526male:2:37
1309	3526	Fresh fruit intake	Mother's age at death	22	6	1.01873e-05	0.818237	0.000155458	0.137327	-1	-1	-0.0529053	5.67195e-05	0.0375025	ENSG00000169575.4,ENSG00000198477.3,ENSG00000169548.3,ENSG00000185686.13,ENSG00000220891.1,ENSG00000100121.8	VPREB1,ZNF280B,ZNF280A,PRAME,LL22NC03-63E9.3,GGTLC2	1309female:3526male:22:6
1309	50	Fresh fruit intake	Standing height	8	17	8.77634e-05	0.0828542	0.00013215	0.0228155	-1	-1	-0.175918	2.86384e-05	0.035163			1309female:50male:8:17
1309	924	Fresh fruit intake	Usual walking pace	5	44	0.000173533	0	0.000136666	0.0577291	0.956996	0.60056	1	0.000224165	0.0444097	ENSG00000248789.1,ENSG00000152684.10	CTD-2203A3.1,PELO	1309female:924male:5:44
1309	924	Fresh fruit intake	Usual walking pace	11	121	1.52806e-05	0.663446	6.52742e-05	0.280335	-1	-1	-0.0691069	1.0691e-05	0.0324382			1309female:924male:11:121
1309	924	Fresh fruit intake	Usual walking pace	12	36	3.94666e-05	0.130042	2.24594e-05	0.0725241	1	0.0761076	1	7.73097e-05	0.0387669	ENSG00000110975.4,ENSG00000139133.2	SYT10,ALG10	1309female:924male:12:36
1309	I9_CHD	Fresh fruit intake	Major coronary heart disease event	6	135	4.08001e-05	0.200625	5.80231e-05	0.12676	1	0.422542	1	1.67525e-05	0.0328404	ENSG00000112029.5,ENSG00000112031.11,ENSG00000091844.3,ENSG00000213121.2	FBXO5,MTRF1L,RGS17,AL590867.1	1309female:I9_CHDmale:6:135
1309	I9_CHD	Fresh fruit intake	Major coronary heart disease event	9	3	3.36924e-05	0.365914	5.66828e-05	0.101432	-1	-1	-0.0505051	9.94805e-06	0.0319518			1309female:I9_CHDmale:9:3
1309	I9_CHD	Fresh fruit intake	Major coronary heart disease event	11	124	0.000119498	0.0124272	8.33766e-06	0.885986	-1	-1	-0.189119	6.44596e-05	0.0381041	ENSG00000134954.10,ENSG00000151702.12,ENSG00000151704.11,ENSG00000120457.7,ENSG00000174370.5,ENSG00000120471.10,ENSG00000134909.14,ENSG00000043039.5	ETS1,FLI1,KCNJ1,KCNJ5,C11orf45,TP53AIP1,ARHGAP32,BARX2	1309female:I9_CHDmale:11:124
1309	I9_CHD	Fresh fruit intake	Major coronary heart disease event	18	29	7.95745e-05	0.0684827	7.35248e-05	0.187058	-1	-1	-0.309931	1.53545e-05	0.0328404			1309female:I9_CHDmale:18:29
1309	II_NEOPLASM	Fresh fruit intake	Neoplasms	2	143	0.000197836	0.0457495	6.87251e-05	0.395988	1	0.39994	1	3.53294e-05	0.0356499	ENSG00000153234.9,ENSG00000115159.11,ENSG00000268857.1	NR4A2,GPD2,AC011308.1	1309female:II_NEOPLASMmale:2:143
1309	II_NEOPLASM	Fresh fruit intake	Neoplasms	8	104	3.91657e-05	0.32454	1.26686e-05	0.723099	1	0.0367037	1	1.44537e-05	0.0328404	ENSG00000164830.13,ENSG00000174429.3	OXR1,ABRA	1309female:II_NEOPLASMmale:8:104
1309	II_NEOPLASM	Fresh fruit intake	Neoplasms	12	40	3.28591e-05	0.561731	3.22351e-05	0.30608	1	0.0775078	1	5.44692e-05	0.0374531	ENSG00000180116.11,ENSG00000151229.8,ENSG00000188906.9,ENSG00000205592.9	C12orf40,SLC2A13,LRRK2,MUC19	1309female:II_NEOPLASMmale:12:40
1309	20002_1223	Fresh fruit intake	Type 2 diabetes	5	131	5.45992e-05	0.192836	3.95026e-05	0.484375	1	0.420742	1	0.000188777	0.0427865			1309female:20002_1223male:5:131
1309	20002_1223	Fresh fruit intake	Type 2 diabetes	6	99	4.3294e-05	0.178947	5.07348e-05	0.353523	1	0.125713	1	0.000129873	0.0405803	ENSG00000203797.5,ENSG00000004809.9,ENSG00000155111.10,ENSG00000123505.10,ENSG00000155115.6,ENSG00000197498.8	DDO,SLC22A16,CDK19,AMD1,GTF3C6,RPF2	1309female:20002_1223male:6:99
1309	20002_1223	Fresh fruit intake	Type 2 diabetes	13	26	0.000102654	0.0559576	1.48672e-05	0.743252	1	0.185919	1	1.82304e-06	0.0211376	ENSG00000083635.7,ENSG00000133114.13,ENSG00000188342.7,ENSG00000180332.5,ENSG00000133112.12,ENSG00000174032.12,ENSG00000136152.10,ENSG00000165837.7,ENSG00000174015.5,ENSG00000215475.3	NUFIP1,GPALPP1,GTF2F2,KCTD4,TPT1,SLC25A30,COG3,FAM194B,SPERT,SIAH3	1309female:20002_1223male:13:26
1309	20002_1286	Fresh fruit intake	Depression	3	155	0.000221259	0.127356	9.4622e-05	0	1	0.60056	1	0.000177024	0.0423996			1309female:20002_1286male:3:155
1558	20022	Alcohol intake frequency.	Birth weight	19	63	0.00020957	0.0477157	3.92765e-05	0	-1	-1	-0.284928	0.000129318	0.0405803	ENSG00000178201.3,ENSG00000197128.7,ENSG00000105136.15,ENSG00000268107.1,ENSG00000152439.8,ENSG00000121406.4,ENSG00000251369.4,ENSG00000083817.8,ENSG00000171649.7,ENSG00000183647.6,ENSG00000213762.6,ENSG00000121417.9,ENSG00000180532.6,ENSG00000204519.6,ENSG00000269026.2,ENSG00000268948.1,ENSG00000179909.11,ENSG00000083814.8,ENSG00000152443.8,ENSG00000083828.11,ENSG00000178935.5,ENSG00000268750.2,…	VN1R1,ZNF772,ZNF419,AC003005.4,ZNF773,ZNF549,ZNF550,ZNF416,ZIK1,ZNF530,ZNF134,ZNF211,ZSCAN4,ZNF551,AC003006.7,AC004017.1,ZNF154,ZNF671,ZNF776,ZNF586,ZNF552,CTD-2583A14.10,ZNF587B,ZNF814,ZNF587,CTD-2583A14.9,ZNF417,ZNF418,ZNF256,C19orf18,ZNF606,CTD-2368P22.1,ZSCAN1,ZNF135,ZSCAN18,ZNF329,ZNF274,ZNF544,CTD-3138B18.4,ZNF8,ZNF8,AC010642.1,ZSCAN22,A1BG,ZNF497,ZNF837,RPS5,AC012313.1,ZNF584,ZNF132,ZNF324…	1558female:20022male:19:63
1558	20116_2	Alcohol intake frequency.	Smoking status: Current	5	148	0.000103507	0.0238805	0.000212745	0.02738	-1	-1	-0.632763	0.000320502	0.0484936	ENSG00000113763.6,ENSG00000160883.6,ENSG00000087206.12,ENSG00000113761.7,ENSG00000160867.10,ENSG00000165671.14,ENSG00000169228.9,ENSG00000213347.6,ENSG00000169230.5,ENSG00000169223.10,ENSG00000169220.13,ENSG00000131183.6,ENSG00000196570.2,ENSG00000131187.5,ENSG00000198055.6,ENSG00000131188.7,ENSG00000113758.9,ENSG00000196923.9,ENSG00000146094.9,ENSG00000183258.7,ENSG00000146067.11,ENSG00000184840…	UNC5A,HK3,UIMC1,ZNF346,FGFR4,NSD1,RAB24,MXD3,PRELID1,LMAN2,RGS14,SLC34A1,PFN3,F12,GRK6,PRR7,DBN1,PDLIM7,DOK3,DDX41,FAM193B,TMED9,B4GALT7,FAM153A,RP11-1026M7.2,PROP1,FAM153C,N4BP3,RMND5B,NHP2,HNRNPAB	1558female:20116_2male:5:148
1558	20116_2	Alcohol intake frequency.	Smoking status: Current	11	51	9.91578e-06	0.378384	5.4225e-05	0.216962	1	0.40174	1	9.85387e-05	0.0388849	ENSG00000182053.8,ENSG00000214891.4,ENSG00000086205.12	TRIM49B,TRIM64C,FOLH1	1558female:20116_2male:11:51
1558	20116_2	Alcohol intake frequency.	Smoking status: Current	14	46	6.10517e-05	0.0549521	6.68199e-05	0.163947	1	0.00890089	1	7.45951e-05	0.0387441	ENSG00000185650.8,ENSG00000072110.9,ENSG00000139990.13,ENSG00000081177.14	ZFP36L1,ACTN1,DCAF5,EXD2	1558female:20116_2male:14:46
1558	21001	Alcohol intake frequency.	Body mass index (BMI)	2	52	1.05202e-05	0.871558	0.000296929	0.000396113	1	0.0383038	1	5.36623e-06	0.027338	ENSG00000116016.9,ENSG00000187600.8,ENSG00000250565.2,ENSG00000119729.6,ENSG00000151665.8,ENSG00000119878.5,ENSG00000171150.7,ENSG00000222005.4,ENSG00000239332.1,ENSG00000180398.7,ENSG00000068724.11	EPAS1,TMEM247,ATP6V1E2,RHOQ,PIGF,CRIPT,SOCS5,LINC01118,LINC01119,MCFD2,TTC7A	1558female:21001male:2:52
1558	21001	Alcohol intake frequency.	Body mass index (BMI)	2	67	7.52411e-05	0.593444	0.000551623	0.00104296	1	0.641964	1	0.00014196	0.0409571			1558female:21001male:2:67
1558	21001	Alcohol intake frequency.	Body mass index (BMI)	6	22	3.94728e-05	0.482877	0.000189362	0.0111617	1	0.386539	1	0.000129701	0.0405803			1558female:21001male:6:22
1558	21001	Alcohol intake frequency.	Body mass index (BMI)	9	97	9.18935e-05	0.262802	0.000460568	0.0114839	1	0.613161	1	0.000190183	0.0428134	ENSG00000078725.8,ENSG00000260970.1	BRINP1,RP11-295D22.1	1558female:21001male:9:97
1558	21001	Alcohol intake frequency.	Body mass index (BMI)	16	34	0.000121234	0.285108	0.00308681	3.09672e-18	0.923592	0.494749	1	0.000142527	0.0409571	ENSG00000103479.10,ENSG00000166971.12,ENSG00000103494.8,ENSG00000140718.14,ENSG00000259517.1,ENSG00000177508.11	RBL2,AKTIP,RPGRIP1L,FTO,RP11-324D17.1,IRX3	1558female:21001male:16:34
1558	2139	Alcohol intake frequency.	Age first had sexual intercourse	10	97	2.81173e-05	0.343788	0.000208839	0.00034501	-1	-1	-0.271927	6.17204e-06	0.0278471	ENSG00000120055.5,ENSG00000138111.10,ENSG00000138107.7,ENSG00000107882.7,ENSG00000171206.9,ENSG00000138175.8,ENSG00000156398.8,ENSG00000166272.12,ENSG00000148795.5,ENSG00000166275.11,ENSG00000270316.1,ENSG00000214435.3,ENSG00000148842.13,ENSG00000076685.14,ENSG00000235376.5,ENSG00000148798.5,ENSG00000156374.10,ENSG00000148835.9,ENSG00000173915.8,ENSG00000148843.9,ENSG00000138172.6,ENSG00000185933…	C10orf95,TMEM180,ACTR1A,SUFU,TRIM8,ARL3,SFXN2,WBP1L,CYP17A1,C10orf32,C10orf32-ASMT,AS3MT,CNNM2,NT5C2,RPEL1,INA,PCGF6,TAF5,USMG5,PDCD11,CALHM2,CALHM1,CALHM3,NEURL1,SH3PXD2A,OBFC1,SLK,COL17A1,SFR1,WDR96,GSTO1,GSTO2,ITPRIP	1558female:2139male:10:97
1558	2139	Alcohol intake frequency.	Age first had sexual intercourse	11	104	4.17903e-05	0.326802	0.000197793	0.04968	-1	-1	-0.0971097	4.07399e-05	0.0363739	ENSG00000137752.18,ENSG00000204397.3,ENSG00000255221.2,ENSG00000255501.1,ENSG00000152578.8,ENSG00000170903.6	CASP1,CARD16,CARD17,CARD18,GRIA4,MSANTD4	1558female:2139male:11:104
1558	2149	Alcohol intake frequency.	Lifetime number of sexual partners	1	12	0.000247897	0.00560364	7.11804e-05	0.454511	1	0.235724	1	3.35621e-05	0.0351742	ENSG00000171612.6,ENSG00000188807.8,ENSG00000171608.11,ENSG00000179840.5,ENSG00000171603.12,ENSG00000178585.10,ENSG00000162441.7,ENSG00000173614.9,ENSG00000162444.11,ENSG00000130939.14,ENSG00000054523.12,ENSG00000142657.16,ENSG00000175279.17,ENSG00000251503.3,ENSG00000241563.2,ENSG00000160049.7,ENSG00000142655.8	SLC25A33,TMEM201,PIK3CD,C1orf200,CLSTN1,CTNNBIP1,LZIC,NMNAT1,RBP7,UBE4B,KIF1B,PGD,APITD1,APITD1-CORT,CORT,DFFA,PEX14	1558female:2149male:1:12
1558	2149	Alcohol intake frequency.	Lifetime number of sexual partners	8	78	1.22131e-05	0.809215	0.000207688	0.0129461	1	0.30313	1	0.000235883	0.0448257	ENSG00000147601.9,ENSG00000164764.10,ENSG00000147604.9,ENSG00000121039.5,ENSG00000040341.13,ENSG00000258677.2,ENSG00000104343.15,ENSG00000154582.12,ENSG00000175606.6,ENSG00000154589.2	TERF1,SBSPON,RPL7,RDH10,STAU2,RP11-463D19.2,UBE2W,TCEB1,TMEM70,LY96	1558female:2149male:8:78
1558	2149	Alcohol intake frequency.	Lifetime number of sexual partners	11	104	4.17903e-05	0.326802	8.38152e-05	0.0811353	1	0.421542	1	0.000345732	0.0495447	ENSG00000137752.18,ENSG00000204397.3,ENSG00000255221.2,ENSG00000255501.1,ENSG00000152578.8,ENSG00000170903.6	CASP1,CARD16,CARD17,CARD18,GRIA4,MSANTD4	1558female:2149male:11:104
1558	2149	Alcohol intake frequency.	Lifetime number of sexual partners	12	61	1.0432e-05	0.807432	0.0001427	0.0505878	1	0.111311	1	0.000203812	0.0436374	ENSG00000174206.8,ENSG00000185306.8,ENSG00000184575.7,ENSG00000183735.5,ENSG00000153179.7,ENSG00000268028.1,ENSG00000135677.6,ENSG00000111490.8,ENSG00000156076.5,ENSG00000174106.2,ENSG00000174099.6	C12orf66,C12orf56,XPOT,TBK1,RASSF3,AC025262.1,GNS,TBC1D30,WIF1,LEMD3,MSRB3	1558female:2149male:12:61
1558	2207	Alcohol intake frequency.	Wears glasses or contact lenses	15	50	0.000130362	0.0379622	5.66815e-05	0.341073	-1	-1	-0.184918	0.000123125	0.0402602	ENSG00000183496.5,ENSG00000259518.1,ENSG00000140598.9,ENSG00000188659.5,ENSG00000205281.6,ENSG00000197978.8,ENSG00000184779.8,ENSG00000215749.8,ENSG00000259243.1,ENSG00000196648.6,ENSG00000182774.6,ENSG00000260836.1,ENSG00000261086.1,ENSG00000214575.5,ENSG00000103723.8,ENSG00000186628.8,ENSG00000156232.6,ENSG00000103942.8,ENSG00000169612.3,ENSG00000169609.9,ENSG00000064726.5,ENSG00000136404.11,EN…	MEX3B,RP11-597K23.2,EFTUD1,FAM154B,GOLGA6L10,GOLGA6L9,RPS17,GOLGA6L18,GOLGA6L19,GOLGA6L20,RPS17L,RP11-152F13.10,RP11-379H8.1,CPEB1,AP3B2,FSD2,WHAMM,HOMER2,FAM103A1,C15orf40,BTBD1,TM6SF1,HDGFRP3,BNC1	1558female:2207male:15:50
1558	22501	Alcohol intake frequency.	Year ended full time education	2	209	5.96445e-05	0.196876	0.000176077	0.0881025	-1	-1	-0.285529	0.000179321	0.0424803	ENSG00000237412.2,ENSG00000135902.5,ENSG00000196811.7,ENSG00000221944.3,ENSG00000135930.9,ENSG00000115468.7,ENSG00000204120.10,ENSG00000115474.6,ENSG00000182600.5,ENSG00000066248.10,ENSG00000222001.2,ENSG00000115488.3	PRSS56,CHRND,CHRNG,TIGD1,EIF4E2,EFHD1,GIGYF2,KCNJ13,C2orf82,NGEF,AC106876.2,NEU2	1558female:22501male:2:209
1558	23105	Alcohol intake frequency.	Basal metabolic rate	10	96	2.9081e-05	0.672345	0.00018878	0.2717	1	0.446345	1	0.000217694	0.0440615	ENSG00000119906.7,ENSG00000055950.12,ENSG00000095539.11,ENSG00000107815.3,ENSG00000107816.13,ENSG00000186862.13,ENSG00000107819.9,ENSG00000107821.10,ENSG00000236311.2,ENSG00000269259.1,ENSG00000107807.8,ENSG00000138136.5,ENSG00000166167.13,ENSG00000166171.8,ENSG00000166169.12,ENSG00000107829.9,ENSG00000107831.8,ENSG00000107833.6,ENSG00000198408.9,ENSG00000120049.14,ENSG00000120029.8,ENSG000001661…	FAM178A,MRPL43,SEMA4G,C10orf2,LZTS2,PDZD7,SFXN3,KAZALD1,TLX1NB,HUG1,TLX1,LBX1,BTRC,DPCD,POLL,FBXW4,FGF8,NPM3,MGEA5,KCNIP2,C10orf76,HPS6,LDB1,PPRC1,NOLC1,ELOVL3,PITX3,GBF1,NFKB2,PSD,FBXL15,CUEDC2	1558female:23105male:10:96
1558	23105	Alcohol intake frequency.	Basal metabolic rate	16	23	4.4265e-05	0.451935	0.000339608	0.000286577	1	0.455946	1	0.000279899	0.0466442	ENSG00000006116.3,ENSG00000122257.14,ENSG00000090905.13,ENSG00000158865.8,ENSG00000140750.12,ENSG00000205629.7	CACNG3,RBBP6,TNRC6A,SLC5A11,ARHGAP17,LCMT1	1558female:23105male:16:23
1558	23105	Alcohol intake frequency.	Basal metabolic rate	18	49	0.000193651	0.00405678	0.00163776	6.97303e-07	0.887789	0.537554	1	0.000162488	0.0417968	ENSG00000166603.3	MC4R	1558female:23105male:18:49
1558	3526	Alcohol intake frequency.	Mother's age at death	3	132	0.000172129	0.0289013	0.000148051	0.213835	-1	-1	-0.382738	1.49123e-05	0.0328404	ENSG00000196428.8,ENSG00000120742.6,ENSG00000144895.7,ENSG00000198843.8,ENSG00000163645.10,ENSG00000181788.3,ENSG00000214237.5,ENSG00000260234.1,ENSG00000163646.6,ENSG00000174946.5,ENSG00000174944.4,ENSG00000138271.4,ENSG00000181631.6,ENSG00000169313.9	TSC22D2,SERP1,EIF2A,SELT,FAM194A,SIAH2,FAM188B2,RP11-166N6.3,CLRN1,GPR171,P2RY14,GPR87,P2RY13,P2RY12	1558female:3526male:3:132
1558	3526	Alcohol intake frequency.	Mother's age at death	21	22	4.22811e-05	0.379652	2.40542e-05	0.803091	-1	-1	-0.089909	0.000254414	0.045513	ENSG00000268098.1,ENSG00000185917.9,ENSG00000159228.8,ENSG00000159231.5,ENSG00000142197.8,ENSG00000159256.8,ENSG00000159259.7,ENSG00000159261.6,ENSG00000267976.1	AP000688.1,SETD4,CBR1,CBR3,DOPEY2,MORC3,CHAF1B,CLDN14,AP000695.1	1558female:3526male:21:22
1558	50	Alcohol intake frequency.	Standing height	1	198	4.00604e-05	0.438733	0.000146292	0.0527216	-1	-1	-0.0415042	0.000175102	0.0422889	ENSG00000162851.6,ENSG00000162852.9,ENSG00000143653.9,ENSG00000153207.10,ENSG00000197472.10,ENSG00000135747.7,ENSG00000188295.10,ENSG00000221953.2,ENSG00000196418.8,ENSG00000162714.8	TFB2M,CNST,SCCPDH,AHCTF1,ZNF695,ZNF670,ZNF669,C1orf229,ZNF124,ZNF496	1558female:50male:1:198
1558	50	Alcohol intake frequency.	Standing height	2	151	1.10051e-05	0	7.79157e-05	0.00115094	-1	-1	-0.118512	5.60455e-05	0.0375025	ENSG00000163092.15	XIRP2	1558female:50male:2:151
1558	50	Alcohol intake frequency.	Standing height	11	119	0.000111996	0.00381762	2.74938e-05	0.468435	-1	-1	-0.355936	2.75024e-06	0.0233516	ENSG00000166257.4,ENSG00000166261.6,ENSG00000221931.2,ENSG00000196099.4,ENSG00000204300.2,ENSG00000181518.2,ENSG00000171014.2,ENSG00000181499.2,ENSG00000196248.4,ENSG00000198674.3,ENSG00000254737.1,ENSG00000236981.1,ENSG00000234560.3,ENSG00000182634.7,ENSG00000110002.11,ENSG00000197309.2,ENSG00000255298.2,ENSG00000196341.2,ENSG00000197263.2,ENSG00000204293.2,ENSG00000196661.3,ENSG00000198657.3,EN…	SCN3B,ZNF202,OR6X1,OR6M1,TMEM225,OR8D4,OR4D5,OR6T1,OR10S1,OR10G6,OR10G4,OR10G9,OR10G8,OR10G7,VWA5A,OR10D3,OR8G5,OR8D1,OR8D2,OR8B2,OR8B3,OR8B4,OR8B8	1558female:50male:11:119
1558	924	Alcohol intake frequency.	Usual walking pace	1	33	5.30083e-05	0.467474	0.000215497	0.051246	-1	-1	-0.59616	3.44265e-05	0.0354424	ENSG00000142698.10	C1orf94	1558female:924male:1:33
1558	924	Alcohol intake frequency.	Usual walking pace	4	89	5.80067e-05	0.167401	0.000149703	0.0588591	-1	-1	-0.554155	3.47348e-06	0.0251331	ENSG00000172238.3	ATOH1	1558female:924male:4:89
1558	924	Alcohol intake frequency.	Usual walking pace	7	93	7.74565e-05	0.0479507	0.000119493	0.0330132	-1	-1	-0.59696	0.000207564	0.0437892	ENSG00000244623.1,ENSG00000146833.11,ENSG00000176402.5,ENSG00000160862.8,ENSG00000106261.12,ENSG00000166529.10,ENSG00000166526.12,ENSG00000168090.5,ENSG00000166508.13,ENSG00000221838.5,ENSG00000106290.10,ENSG00000166997.3,ENSG00000214309.3,ENSG00000188186.6,ENSG00000146826.10,ENSG00000197093.6,ENSG00000213420.3,ENSG00000066923.13,ENSG00000160844.6,ENSG00000213413.2,ENSG00000214300.6,ENSG000001217…	OR2AE1,TRIM4,GJC3,AZGP1,ZKSCAN1,ZSCAN21,ZNF3,COPS6,MCM7,AP4M1,TAF6,CNPY4,MBLAC1,LAMTOR4,C7orf43,GAL3ST4,GPC2,STAG3,GATS,PVRIG,SPDYE3,PILRB,PILRA,ZCWPW1,MEPCE,PPP1R35,C7orf61,TSC22D4,NYAP1,AGFG2,SAP25,LRCH4,FBXO24,PCOLCE,MOSPD3,TFR2,ACTL6B,GNB2,GIGYF1,POP7,EPO,EPHB4,SLC12A9,TRIP6,SRRT,UFSP1,ACHE,MUC3A,MUC3A,MUC12,MUC17,TRIM56,SERPINE1,AP1S1,VGF,NAT16	1558female:924male:7:93
1558	924	Alcohol intake frequency.	Usual walking pace	7	117	0.000439242	5.69316e-06	2.399e-05	0.811158	-1	-1	-0.0723072	9.5157e-06	0.0316601	ENSG00000183470.5,ENSG00000106554.7,ENSG00000131558.10	AC009365.3,CHCHD3,EXOC4	1558female:924male:7:117
1558	924	Alcohol intake frequency.	Usual walking pace	19	8	2.99834e-05	0.547829	9.73838e-05	0.0549592	-1	-1	-0.282728	8.09258e-05	0.0387669	ENSG00000130254.7,ENSG00000160633.8,ENSG00000130255.8,ENSG00000174917.4,ENSG00000167733.9,ENSG00000196365.7,ENSG00000174898.11,ENSG00000212123.3,ENSG00000267157.1,ENSG00000141994.11,ENSG00000171119.2,ENSG00000156413.9,ENSG00000171124.8,ENSG00000130383.6,ENSG00000267740.1,ENSG00000174886.8,ENSG00000267314.1,ENSG00000187650.3,ENSG00000105519.8,ENSG00000031823.10,ENSG00000087903.8,ENSG00000130377.9,…	SAFB2,SAFB,RPL36,C19orf70,HSD11B1L,LONP1,CATSPERD,PRR22,CTB-54O9.9,DUS3L,NRTN,FUT6,FUT3,FUT5,AC024592.12,NDUFA11,AC104532.2,VMAC,CAPS,RANBP3,RFX2,ACSBG2,MLLT1,ACER1,CLPP,ALKBH7,PSPN,GTF2F1,KHSRP,SLC25A41	1558female:924male:19:8
1558	II_NEOPLASM	Alcohol intake frequency.	Neoplasms	3	121	3.59174e-05	0.328677	6.34414e-05	0.0405028	-1	-1	-0.251325	1.05879e-05	0.0324382	ENSG00000168875.1,ENSG00000066405.8,ENSG00000158163.10,ENSG00000118017.3,ENSG00000138231.8,ENSG00000114098.13,ENSG00000181322.9,ENSG00000158186.8,ENSG00000158220.9,ENSG00000114107.4,ENSG00000158234.8,ENSG00000051382.4,ENSG00000183770.5,ENSG00000206262.4	SOX14,CLDN18,DZIP1L,A4GNT,DBR1,ARMC8,NME9,MRAS,ESYT3,CEP70,FAIM,PIK3CB,FOXL2,C3orf72	1558female:II_NEOPLASMmale:3:121
1558	20002_1286	Alcohol intake frequency.	Depression	3	89	2.55443e-05	0.703537	0.000180591	0.0966244	-1	-1	-0.170717	0.000137571	0.0407291			1558female:20002_1286male:3:89
1558	20002_1291	Alcohol intake frequency.	Mania/Bipolar disorder	10	35	0.000150809	0.0118128	8.50989e-06	0.920012	-1	-1	-0.132313	0.000103305	0.0390591	ENSG00000165757.8,ENSG00000107951.8,ENSG00000107968.5	KIAA1462,MTPAP,MAP3K8	1558female:20002_1291male:10:35
1558	20002_1291	Alcohol intake frequency.	Mania/Bipolar disorder	13	40	0.000104938	0.0275439	2.85003e-05	0.338761	-1	-1	-0.151315	0.000131065	0.0405803			1558female:20002_1291male:13:40
20022	20116_2	Birth weight	Smoking status: Current	3	166	0.000148971	0.0973059	4.77046e-05	0.425562	1	0.464546	1	0.000210733	0.0437892	ENSG00000090530.5,ENSG00000163347.5,ENSG00000113946.3,ENSG00000198398.2,ENSG00000196083.5	LEPREL1,CLDN1,CLDN16,TMEM207,IL1RAP	20022female:20116_2male:3:166
20022	20116_2	Birth weight	Smoking status: Current	20	11	1.44983e-05	0.915591	0.000181706	0	-1	-1	-0.0837084	7.9262e-05	0.0387669	ENSG00000125869.5,ENSG00000101349.12,ENSG00000132623.11	LAMP5,PAK7,ANKEF1	20022female:20116_2male:20:11
20022	2040	Birth weight	Risk taking	6	69	7.81722e-05	0.0663785	0.00017725	0.0608686	-1	-1	-0.79778	0.000100512	0.0388952	ENSG00000135312.4,ENSG00000269964.2	HTR1B,MEI4	20022female:2040male:6:69
20022	20458	Birth weight	General happiness	2	130	0.000112239	0.118385	0.000300724	0.0406136	1	0.0467047	1	4.01133e-05	0.0362489			20022female:20458male:2:130
20022	21001	Birth weight	Body mass index (BMI)	2	17	0.00018917	0.0217952	3.95048e-05	0.583775	1	0.10091	1	7.73795e-05	0.0387669			20022female:21001male:2:17
20022	21001	Birth weight	Body mass index (BMI)	2	47	0.000104914	0.107661	0.00012777	0.00380474	1	0.583758	1	0.000264077	0.0459336	ENSG00000143924.14,ENSG00000115944.10,ENSG00000171126.7,ENSG00000057935.9,ENSG00000162881.5,ENSG00000162882.10	EML4,COX7A2L,KCNG3,MTA3,OXER1,HAAO	20022female:21001male:2:47
20022	21001	Birth weight	Body mass index (BMI)	3	131	0.000228329	0.106806	0.000112283	0.184981	-1	-1	-0.283728	8.70706e-05	0.0387952	ENSG00000163754.13,ENSG00000071794.11,ENSG00000163755.4,ENSG00000047457.9,ENSG00000163762.2,ENSG00000169908.6,ENSG00000169903.6,ENSG00000018408.10,ENSG00000114744.4,ENSG00000206199.5,ENSG00000082996.15,ENSG00000070087.9,ENSG00000268175.1	GYG1,HLTF,HPS3,CP,TM4SF18,TM4SF1,TM4SF4,WWTR1,COMMD2,ANKUB1,RNF13,PFN2,AC117395.1	20022female:21001male:3:131
20022	2139	Birth weight	Age first had sexual intercourse	7	73	9.10404e-05	0.530659	0.000198963	0.236052	1	0.50335	1	0.000147241	0.0411244	ENSG00000106077.14,ENSG00000165215.5,ENSG00000189143.8,ENSG00000165171.6,ENSG00000175877.3,ENSG00000049540.12,ENSG00000106683.10,ENSG00000106682.10,ENSG00000086730.12,ENSG00000049541.6,ENSG00000106665.11,ENSG00000006704.6,ENSG00000077809.8,ENSG00000158517.9,ENSG00000196275.9,ENSG00000183086.10,ENSG00000174374.9,ENSG00000174428.12,ENSG00000198750.7,ENSG00000268891.1,ENSG00000178809.7,ENSG000001352…	ABHD11,CLDN3,CLDN4,WBSCR27,WBSCR28,ELN,LIMK1,EIF4H,LAT2,RFC2,CLIP2,GTF2IRD1,GTF2I,NCF1,GTF2IRD2,GATSL1,WBSCR16,GTF2IRD2B,GATSL2,AC006014.1,TRIM73,POM121C	20022female:2139male:7:73
20022	2207	Birth weight	Wears glasses or contact lenses	10	86	0.000132983	0.224967	7.01208e-05	0.310475	-1	-1	-0.370137	1.83213e-05	0.0331133	ENSG00000119922.7,ENSG00000119917.9,ENSG00000204010.3,ENSG00000185745.8,ENSG00000152778.7,ENSG00000152779.12,ENSG00000152782.12,ENSG00000138182.10	IFIT2,IFIT3,IFIT1B,IFIT1,IFIT5,SLC16A12,PANK1,KIF20B	20022female:2207male:10:86
20022	23105	Birth weight	Basal metabolic rate	4	22	0.000377276	0.000749769	0.00110096	1.90658e-08	0.913791	0.613161	1	3.07791e-05	0.035163	ENSG00000151552.7,ENSG00000249581.2,ENSG00000002549.8,ENSG00000118579.7,ENSG00000047662.4,ENSG00000163257.6,ENSG00000109805.5,ENSG00000178177.10	QDPR,CLRN2,LAP3,MED28,FAM184B,DCAF16,NCAPG,LCORL	20022female:23105male:4:22
20022	23105	Birth weight	Basal metabolic rate	7	87	0.000313888	0.00538113	0.000384117	0.00326325	1	0.659166	1	0.000162958	0.041855	ENSG00000205413.3,ENSG00000177409.7,ENSG00000188175.5,ENSG00000004766.11,ENSG00000004948.9,ENSG00000127928.8,ENSG00000105825.7,ENSG00000127920.5,ENSG00000105829.7	SAMD9,SAMD9L,HEPACAM2,CCDC132,CALCR,GNGT1,TFPI2,GNG11,BET1	20022female:23105male:7:87
20022	23105	Birth weight	Basal metabolic rate	8	80	9.40073e-05	0.132741	0.000213298	0.0109644	1	0.356136	1	1.22693e-05	0.0328404	ENSG00000164749.7	HNF4G	20022female:23105male:8:80
20022	23105	Birth weight	Basal metabolic rate	12	62	0.00153123	0.0256518	0.00206919	0.0007457	0.971597	0.718172	1	1.0899e-06	0.0179111	ENSG00000149948.9,ENSG00000197301.3,ENSG00000267942.1,ENSG00000139233.2,ENSG00000228144.2,ENSG00000155957.12,ENSG00000090376.4,ENSG00000127311.5	HMGA2,RP11-366L20.2,AC090673.2,LLPH,TMBIM4,TMBIM4,IRAK3,HELB	20022female:23105male:12:62
20022	23105	Birth weight	Basal metabolic rate	18	66	0.000184875	0.245168	6.06245e-05	0.482455	1	0.443544	1	0.000184551	0.0426632			20022female:23105male:18:66
20022	23105	Birth weight	Basal metabolic rate	22	19	4.11602e-05	0.413457	6.62533e-05	0.199094	1	0.0929093	1	7.25363e-05	0.0385197	ENSG00000175329.8,ENSG00000100281.9,ENSG00000100284.16,ENSG00000100292.12,ENSG00000100297.11,ENSG00000100302.6,ENSG00000198125.8,ENSG00000268818.1,ENSG00000221963.5,ENSG00000128313.2	ISX,HMGXB4,TOM1,HMOX1,MCM5,RASD2,MB,AL049747.1,APOL6,APOL5	20022female:23105male:22:19
20022	50	Birth weight	Standing height	1	80	6.73431e-05	0.453556	0.00058514	0	1	0.551155	1	5.60862e-05	0.0375025	ENSG00000097046.8,ENSG00000069702.6,ENSG00000137948.14,ENSG00000172031.6,ENSG00000189195.5,ENSG00000069712.9,ENSG00000203910.4,ENSG00000174842.12,ENSG00000122484.8	CDC7,TGFBR3,BRDT,EPHX4,BTBD8,KIAA1107,C1orf146,GLMN,RPAP2	20022female:50male:1:80
20022	50	Birth weight	Standing height	3	46	0.000411802	0.000949613	0.00107801	7.88475e-07	0.932393	0.559956	1	9.90619e-05	0.0388849	ENSG00000162244.6,ENSG00000164086.8,ENSG00000256097.1,ENSG00000164087.3,ENSG00000023330.10,ENSG00000239732.2,ENSG00000173366.11,ENSG00000247596.4,ENSG00000164088.13,ENSG00000164091.7,ENSG00000168237.13,ENSG00000114841.13,ENSG00000163930.5,ENSG00000010318.15,ENSG00000010319.2,ENSG00000114854.3,ENSG00000010322.11,ENSG00000010327.6,ENSG00000168268.6,ENSG00000168273.3,ENSG00000163939.14,ENSG000001639…	RPL29,DUSP7,LINC00696,POC1A,ALAS1,TLR9,TLR9,TWF2,PPM1M,WDR82,GLYCTK,DNAH1,BAP1,PHF7,SEMA3G,TNNC1,NISCH,STAB1,NT5DC2,SMIM4,PBRM1,GNL3,GLT8D1,SPCS1,NEK4,ITIH1,ITIH3,ITIH4,RP5-966M1.6,MUSTN1,TMEM110-MUSTN1,TMEM110,SFMBT1,RP11-894J14.5,RFT1,PRKCD,TKT,DCP1A,CACNA1D,CHDH,IL17RB,ACTR8,SELK	20022female:50male:3:46
20022	50	Birth weight	Standing height	3	108	0.000830871	0.0021445	0.000366786	0.00326114	-1	-1	-0.672367	7.31033e-05	0.0386017	ENSG00000173193.9,ENSG00000169087.6,ENSG00000138463.8,ENSG00000082684.10,ENSG00000065485.13,ENSG00000121542.7,ENSG00000173175.10,ENSG00000206527.5	PARP14,HSPBAP1,DIRC2,SEMA5B,PDIA5,SEC22A,ADCY5,PTPLB	20022female:50male:3:108
20022	50	Birth weight	Standing height	4	22	0.000377276	0.000749769	0.00317817	3.14959e-11	1	0.776178	1	1.66694e-06	0.0209683	ENSG00000151552.7,ENSG00000249581.2,ENSG00000002549.8,ENSG00000118579.7,ENSG00000047662.4,ENSG00000163257.6,ENSG00000109805.5,ENSG00000178177.10	QDPR,CLRN2,LAP3,MED28,FAM184B,DCAF16,NCAPG,LCORL	20022female:50male:4:22
20022	50	Birth weight	Standing height	7	29	0.000323896	0.242692	0.000753625	4.58515e-05	1	0.728373	1	8.84099e-05	0.0387952	ENSG00000122550.13,ENSG00000214871.3,ENSG00000136243.12,ENSG00000136235.11,ENSG00000156928.4,ENSG00000136231.9,ENSG00000164548.6,ENSG00000169193.7,ENSG00000188732.6,ENSG00000196335.8	KLHL7,AC005082.1,NUPL2,GPNMB,MALSU1,IGF2BP3,TRA2A,CCDC126,FAM221A,STK31	20022female:50male:7:29
20022	50	Birth weight	Standing height	7	92	6.97002e-05	0.195884	2.72001e-05	0.69115	1	0.277728	1	8.24456e-07	0.0168207	ENSG00000106236.3,ENSG00000166448.10,ENSG00000196367.8,ENSG00000198742.5,ENSG00000185467.7,ENSG00000241685.4,ENSG00000130429.8,ENSG00000106244.8,ENSG00000106245.5,ENSG00000106246.13,ENSG00000248919.3,ENSG00000160917.10,ENSG00000214314.1,ENSG00000241468.3,ENSG00000198556.9,ENSG00000160908.14,ENSG00000196652.7,ENSG00000221909.2,ENSG00000197343.6,ENSG00000272647.1,ENSG00000197037.6,ENSG00000106258.9…	NPTX2,TMEM130,TRRAP,SMURF1,KPNA7,ARPC1A,ARPC1B,PDAP1,BUD31,PTCD1,ATP5J2-PTCD1,CPSF4,AC073063.1,ATP5J2,ZNF789,ZNF394,ZKSCAN5,FAM200A,ZNF655,GS1-259H13.10,ZSCAN25,CYP3A5,CYP3A7,CYP3A4	20022female:50male:7:92
20022	50	Birth weight	Standing height	8	115	0.000251398	0.0843252	0.000138822	0	1	0.517352	1	0.000218455	0.0441027	ENSG00000164761.4,ENSG00000184374.2	TNFRSF11B,COLEC10	20022female:50male:8:115
20022	50	Birth weight	Standing height	11	69	0.000332705	0.0595017	0.000340852	0.00722374	1	0.587959	1	0.000249153	0.0453378	ENSG00000131620.13,ENSG00000168040.4,ENSG00000131626.11,ENSG00000085733.11,ENSG00000162105.12,ENSG00000172893.11,ENSG00000172890.7,ENSG00000244411.2	ANO1,FADD,PPFIA1,CTTN,SHANK2,DHCR7,NADSYN1,KRTAP5-7	20022female:50male:11:69
20022	50	Birth weight	Standing height	12	62	0.00153123	0.0256518	0.00412147	7.28648e-06	0.934393	0.710971	1	1.19213e-07	0.00528107	ENSG00000149948.9,ENSG00000197301.3,ENSG00000267942.1,ENSG00000139233.2,ENSG00000228144.2,ENSG00000155957.12,ENSG00000090376.4,ENSG00000127311.5	HMGA2,RP11-366L20.2,AC090673.2,LLPH,TMBIM4,TMBIM4,IRAK3,HELB	20022female:50male:12:62
20022	50	Birth weight	Standing height	15	65	0.000148604	0.479189	0.00136489	0.00823074	1	0.59676	1	0.000285657	0.0468279	ENSG00000185087.7,ENSG00000140443.9,ENSG00000183571.9,ENSG00000182253.10,ENSG00000103852.8,ENSG00000268730.1	FAM169B,IGF1R,PGPEP1L,SYNM,TTC23,AC022819.2	20022female:50male:15:65
20022	50	Birth weight	Standing height	16	3	0.000305129	0.00602961	0.000839097	8.89182e-06	1	0.718572	1	1.46847e-05	0.0328404	ENSG00000140990.10,ENSG00000140988.11,ENSG00000179580.5,ENSG00000183751.10,ENSG00000196408.7,ENSG00000269205.1,ENSG00000127554.12,ENSG00000127561.10,ENSG00000167962.8,ENSG00000183971.5,ENSG00000065054.9,ENSG00000065057.3,ENSG00000103197.12,ENSG00000008710.13,ENSG00000167964.8,ENSG00000131653.8,ENSG00000167971.14,ENSG00000167965.13,ENSG00000182685.3,ENSG00000184207.8,ENSG00000167967.11,ENSG0000016…	NDUFB10,RPS2,RNF151,TBL3,NOXO1,AC005606.1,GFER,SYNGR3,ZNF598,NPW,SLC9A3R2,NTHL1,TSC2,PKD1,RAB26,TRAF7,CASKIN1,MLST8,BRICD5,PGP,E4F1,DNASE1L2,ECI1,RNPS1,AC009065.1,ABCA3,CCNF,C16orf59,NTN3,TBC1D24,RP11-20I23.1,ATP6V0C,ATP6C,AMDHD2,CEMP1,PDPK1,KCTD5,PRSS27,SRRM2,TCEB2,PRSS33,PRSS21,ZG16B,PRSS22,FLYWCH2,FLYWCH1,KREMEN2,PKMYT1,PAQR4,CLDN9,CLDN6,TNFRSF12A,HCFC1R1,THOC6,CCDC64B,MMP25,IL32,ZSCAN10,ZNF20…	20022female:50male:16:3
20022	924	Birth weight	Usual walking pace	8	72	7.41261e-05	0.234568	0.000123296	0.0454047	1	0.479548	1	0.000309694	0.0480381	ENSG00000147573.12,ENSG00000147571.3,ENSG00000179041.2,ENSG00000147576.11,ENSG00000169085.7,ENSG00000185697.12,ENSG00000175073.7,ENSG00000270024.1,ENSG00000213865.3,ENSG00000104205.8,ENSG00000178460.13,ENSG00000261787.1,ENSG00000178125.10,ENSG00000121022.9,ENSG00000104218.9,ENSG00000066777.4,ENSG00000165078.7	TRIM55,CRH,RRS1,ADHFE1,C8orf46,MYBL1,VCPIP1,C8orf44-SGK3,C8orf44,SGK3,MCMDC2,TCF24,PPP1R42,COPS5,CSPP1,ARFGEF1,CPA6	20022female:924male:8:72
20022	924	Birth weight	Usual walking pace	9	1	2.06861e-05	0.618566	4.8013e-05	0.356473	1	0.0121012	1	1.04439e-05	0.0324382	ENSG00000183784.5,ENSG00000107099.11	C9orf66,DOCK8	20022female:924male:9:1
20022	924	Birth weight	Usual walking pace	17	19	0.000114167	0.0310375	0.000149337	0.000117934	1	0.0479048	1	0.000205647	0.0437526	ENSG00000141026.4,ENSG00000108551.4,ENSG00000133027.13,ENSG00000108557.13,ENSG00000072310.12,ENSG00000175662.13,ENSG00000171962.13,ENSG00000171953.11,ENSG00000141034.5,ENSG00000108591.5,ENSG00000091536.12,ENSG00000091542.8,ENSG00000131899.6,ENSG00000177731.11,ENSG00000177427.8,ENSG00000177302.10,ENSG00000176994.9,ENSG00000176974.13,ENSG00000214860.4,ENSG00000171916.12,ENSG00000213077.5,ENSG000001…	MED9,RASD1,PEMT,RAI1,SREBF1,TOM1L2,LRRC48,ATPAF2,GID4,DRG2,MYO15A,ALKBH5,LLGL1,FLII,MIEF2,TOP3A,SMCR8,SHMT1,EVPLL,LGALS9C,FAM106A,TBC1D28,ZNF286B,TRIM16L,FBXW10,TVP23B,PRPSAP2	20022female:924male:17:19
20022	I9_CHD	Birth weight	Major coronary heart disease event	12	102	0.000165827	0.0631282	9.34681e-05	0.0268357	-1	-1	-0.169517	1.17438e-05	0.0328404	ENSG00000198324.10,ENSG00000111252.6,ENSG00000204842.10,ENSG00000089234.11,ENSG00000111271.10,ENSG00000257767.2,ENSG00000111275.8,ENSG00000089022.9,ENSG00000198270.8,ENSG00000089248.6,ENSG00000111300.5,ENSG00000135148.7,ENSG00000173064.6,ENSG00000089009.11,ENSG00000179295.11,ENSG00000089169.10,ENSG00000089127.8,ENSG00000111331.8,ENSG00000111335.8,ENSG00000135144.3,ENSG00000111344.7,ENSG0000018671…	FAM109A,SH2B3,ATXN2,BRAP,ACAD10,RP11-162P23.2,ALDH2,MAPKAPK5,TMEM116,ERP29,NAA25,TRAFD1,HECTD4,RPL6,PTPN11,RPH3A,OAS1,OAS3,OAS2,DTX1,RASAL1,CCDC42B,DDX54,RITA1,IQCD,TPCN1,SLC8B1,PLBD2,SDS,SDSL,LHX5	20022female:I9_CHDmale:12:102
20022	I9_CHD	Birth weight	Major coronary heart disease event	12	119	6.53127e-05	0.410764	7.95268e-05	0.150972	-1	-1	-0.386539	5.13189e-05	0.0371427			20022female:I9_CHDmale:12:119
20022	II_NEOPLASM	Birth weight	Neoplasms	2	72	0.000102933	0.376089	0.000112288	0.248798	1	0.647165	1	8.0777e-05	0.0387669	ENSG00000143995.15	MEIS1	20022female:II_NEOPLASMmale:2:72
20022	20002_1223	Birth weight	Type 2 diabetes	1	175	0.000198149	0.0646064	2.42007e-05	0.781165	1	0.00550055	1	0.000139202	0.0408934	ENSG00000185842.10,ENSG00000143815.10,ENSG00000203691.2,ENSG00000154380.12,ENSG00000143742.8,ENSG00000143819.8,ENSG00000196187.7,ENSG00000243709.1,ENSG00000255835.1,ENSG00000143811.12,ENSG00000143768.7,ENSG00000143751.9,ENSG00000163041.5,ENSG00000182827.8,ENSG00000185155.7,ENSG00000183814.11	DNAH14,LBR,AC092811.1,ENAH,SRP9,EPHX1,TMEM63A,LEFTY1,RP4-559A3.7,PYCR2,LEFTY2,SDE2,H3F3A,ACBD3,MIXL1,LIN9	20022female:20002_1223male:1:175
20022	20002_1223	Birth weight	Type 2 diabetes	8	129	7.50692e-05	0	5.57957e-05	0.225443	-1	-1	-0.519752	0.000145598	0.0411052	ENSG00000066827.11	ZFAT	20022female:20002_1223male:8:129
20022	20002_1286	Birth weight	Depression	4	73	0.000104513	0.42407	3.59168e-05	0.647169	-1	-1	-0.419542	0.000231018	0.0447241	ENSG00000163626.12,ENSG00000132466.13,ENSG00000163631.12,ENSG00000081051.3,ENSG00000079557.3,ENSG00000169435.9,ENSG00000169429.6,ENSG00000124875.5,ENSG00000109272.3,ENSG00000163739.4,ENSG00000163737.3,ENSG00000163736.3,ENSG00000163735.6	COX18,ANKRD17,ALB,AFP,AFM,RASSF6,IL8,CXCL6,PF4V1,CXCL1,PF4,PPBP,CXCL5	20022female:20002_1286male:4:73
20022	20002_1291	Birth weight	Mania/Bipolar disorder	8	120	0.000207539	0.149498	6.02309e-05	0.35532	1	0.551955	1	0.000330927	0.0489729	ENSG00000183665.4,ENSG00000170881.4,ENSG00000147687.12,ENSG00000147684.3,ENSG00000170873.14,ENSG00000180938.5,ENSG00000104549.7,ENSG00000164961.11,ENSG00000156831.3,ENSG00000173334.3	TRMT12,RNF139,TATDN1,NDUFB9,MTSS1,ZNF572,SQLE,KIAA0196,NSMCE2,TRIB1	20022female:20002_1291male:8:120
20022	20002_1291	Birth weight	Mania/Bipolar disorder	10	69	0.000224878	0	7.52823e-05	0.347742	-1	-1	-0.567557	0.00034212	0.0494307	ENSG00000099284.9,ENSG00000042286.10,ENSG00000156521.9,ENSG00000079332.10,ENSG00000180817.7,ENSG00000148734.7,ENSG00000172731.9,ENSG00000148730.6,ENSG00000156574.5,ENSG00000197604.4,ENSG00000107719.8,ENSG00000180644.6,ENSG00000138316.6,ENSG00000166220.8,ENSG00000166224.12,ENSG00000166228.4	H2AFY2,AIFM2,TYSND1,SAR1A,PPA1,NPFFR1,LRRC20,EIF4EBP2,NODAL,AC022532.1,PALD1,PRF1,ADAMTS14,TBATA,SGPL1,PCBD1	20022female:20002_1291male:10:69
20116_2	2040	Smoking status: Current	Risk taking	1	9	0.000105666	0.185737	0.000134802	0.174955	1	0.70257	1	1.8105e-05	0.0331133	ENSG00000116254.13,ENSG00000116251.5,ENSG00000158286.8,ENSG00000116237.11,ENSG00000173673.7,ENSG00000158292.6,ENSG00000097021.15,ENSG00000069812.7,ENSG00000187017.10,ENSG00000215788.5,ENSG00000171680.16,ENSG00000162408.10,ENSG00000173662.15,ENSG00000204859.7,ENSG00000162413.12,ENSG00000116273.5,ENSG00000041988.11,ENSG00000007923.11	CHD5,RPL22,RNF207,ICMT,HES3,GPR153,ACOT7,HES2,ESPN,TNFRSF25,PLEKHG5,NOL9,TAS1R1,ZBTB48,KLHL21,PHF13,THAP3,DNAJC11	20116_2female:2040male:1:9
20116_2	2040	Smoking status: Current	Risk taking	4	75	6.05325e-05	0.324071	7.65319e-05	0.340806	1	0.527953	1	3.81024e-05	0.0362489	ENSG00000138769.6,ENSG00000138757.10,ENSG00000138768.10,ENSG00000156194.13,ENSG00000138744.10,ENSG00000198301.7,ENSG00000268788.1,ENSG00000138755.5,ENSG00000156219.12,ENSG00000169245.4,ENSG00000169248.8,ENSG00000138750.10,ENSG00000138760.4,ENSG00000189157.9,ENSG00000272414.1,ENSG00000118804.7,ENSG00000163749.13,ENSG00000138771.10,ENSG00000186212.2,ENSG00000138758.7,ENSG00000118816.5	CDKL2,G3BP2,USO1,PPEF2,NAAA,SDAD1,AC110615.1,CXCL9,ART3,CXCL10,CXCL11,NUP54,SCARB2,FAM47E,FAM47E-STBD1,FAM47E-STBD1,CCDC158,SHROOM3,SOWAHB,SEPT11,CCNI	20116_2female:2040male:4:75
20116_2	2040	Smoking status: Current	Risk taking	9	8	4.46382e-05	0.15042	5.64378e-05	0.0459298	1	0.0141014	1	9.28059e-05	0.0388849	ENSG00000205808.4,ENSG00000106993.7,ENSG00000147853.12,ENSG00000120158.7,ENSG00000269305.1,ENSG00000096968.8,ENSG00000268155.1,ENSG00000120210.6,ENSG00000120211.4,ENSG00000107014.7,ENSG00000107018.6	PPAPDC2,CDC37L1,AK3,RCL1,AL158147.2,JAK2,AL161450.1,INSL6,INSL4,RLN2,RLN1	20116_2female:2040male:9:8
20116_2	2040	Smoking status: Current	Risk taking	11	38	7.63805e-05	0.117865	1.26228e-05	0.78619	1	0.111711	1	0.00027081	0.0462066	ENSG00000149089.8,ENSG00000110435.7,ENSG00000269766.1,ENSG00000026508.12,ENSG00000110436.7	APIP,PDHX,AL356215.1,CD44,SLC1A2	20116_2female:2040male:11:38
20116_2	2040	Smoking status: Current	Risk taking	12	99	4.59882e-05	0.248935	4.28377e-05	0.498299	1	0.138514	1	0.000181928	0.0425929	ENSG00000075035.5,ENSG00000174600.9,ENSG00000198855.2,ENSG00000075856.7,ENSG00000136003.11,ENSG00000183160.8,ENSG00000110876.8	WSCD2,CMKLR1,FICD,SART3,ISCU,TMEM119,SELPLG	20116_2female:2040male:12:99
20116_2	2040	Smoking status: Current	Risk taking	14	26	0.000128858	0.0413283	6.78428e-05	0.152689	1	0.559356	1	0.0001691	0.0420477	ENSG00000165496.3,ENSG00000139915.14,ENSG00000272781.1	RPL10L,MDGA2,MDGA2	20116_2female:2040male:14:26
20116_2	21001	Smoking status: Current	Body mass index (BMI)	1	44	0.00011626	0.00315937	0.000223874	0.000373718	1	0.611761	1	2.26229e-06	0.0219526	ENSG00000162373.8,ENSG00000227839.1,ENSG00000162374.12,ENSG00000142700.7,ENSG00000185104.15,ENSG00000123080.6,ENSG00000204006.4,ENSG00000123091.4	BEND5,AL645730.2,ELAVL4,DMRTA2,FAF1,CDKN2C,C1orf185,RNF11	20116_2female:21001male:1:44
20116_2	21001	Smoking status: Current	Body mass index (BMI)	2	1	5.29232e-05	0.298173	0.00117733	0.00010096	1	0.568157	1	0.00025342	0.0454464	ENSG00000184731.5,ENSG00000035115.17,ENSG00000143727.11,ENSG00000189292.11,ENSG00000151353.10	FAM110C,SH3YL1,ACP1,FAM150B,TMEM18	20116_2female:21001male:2:1
20116_2	21001	Smoking status: Current	Body mass index (BMI)	3	122	0.000102909	0.179906	3.22393e-05	0	1	0.517952	1	5.18544e-07	0.0149496	ENSG00000206260.2,ENSG00000175110.7,ENSG00000184814.5,ENSG00000233701.2,ENSG00000184432.5,ENSG00000114113.2,ENSG00000114115.5,ENSG00000163864.10	PRR23A,MRPS22,PRR23B,PRR23C,COPB2,RBP2,RBP1,NMNAT3	20116_2female:21001male:3:122
20116_2	21001	Smoking status: Current	Body mass index (BMI)	7	92	6.64174e-05	0.102649	0.000130913	0.148889	1	0.0591059	1	5.77371e-07	0.015296	ENSG00000106236.3,ENSG00000166448.10,ENSG00000196367.8,ENSG00000198742.5,ENSG00000185467.7,ENSG00000241685.4,ENSG00000130429.8,ENSG00000106244.8,ENSG00000106245.5,ENSG00000106246.13,ENSG00000248919.3,ENSG00000160917.10,ENSG00000214314.1,ENSG00000241468.3,ENSG00000198556.9,ENSG00000160908.14,ENSG00000196652.7,ENSG00000221909.2,ENSG00000197343.6,ENSG00000272647.1,ENSG00000197037.6,ENSG00000106258.9…	NPTX2,TMEM130,TRRAP,SMURF1,KPNA7,ARPC1A,ARPC1B,PDAP1,BUD31,PTCD1,ATP5J2-PTCD1,CPSF4,AC073063.1,ATP5J2,ZNF789,ZNF394,ZKSCAN5,FAM200A,ZNF655,GS1-259H13.10,ZSCAN25,CYP3A5,CYP3A7,CYP3A4	20116_2female:21001male:7:92
20116_2	21001	Smoking status: Current	Body mass index (BMI)	10	108	2.73004e-05	0	0.000135989	0.017824	1	0.236524	1	2.95969e-05	0.035163	ENSG00000165863.12,ENSG00000165868.8,ENSG00000188316.9,ENSG00000187164.13,ENSG00000148704.8,ENSG00000186795.1,ENSG00000165646.7,ENSG00000165650.7,ENSG00000170370.10	C10orf82,HSPA12A,ENO4,KIAA1598,VAX1,KCNK18,SLC18A2,PDZD8,EMX2	20116_2female:21001male:10:108
20116_2	21001	Smoking status: Current	Body mass index (BMI)	11	38	7.63805e-05	0.117865	0.000102475	0.0873816	1	0.636364	1	0.000214291	0.0439174	ENSG00000149089.8,ENSG00000110435.7,ENSG00000269766.1,ENSG00000026508.12,ENSG00000110436.7	APIP,PDHX,AL356215.1,CD44,SLC1A2	20116_2female:21001male:11:38
20116_2	21001	Smoking status: Current	Body mass index (BMI)	17	25	0.000137917	0.0207615	5.12336e-05	0.32268	1	0.322332	1	6.78016e-06	0.0287007	ENSG00000228768.1,ENSG00000172301.6,ENSG00000108651.5,ENSG00000178691.6,ENSG00000185158.8,ENSG00000214708.4,ENSG00000126858.12,ENSG00000269402.1,ENSG00000141314.8,ENSG00000108666.5,ENSG00000010244.12,ENSG00000108671.5,ENSG00000176749.4,ENSG00000176658.12,ENSG00000006042.7	AC003101.1,COPRS,UTP6,SUZ12,LRRC37B,AC090616.2,RHOT1,AC116407.2,RHBDL3,C17orf75,ZNF207,PSMD11,CDK5R1,MYO1D,TMEM98	20116_2female:21001male:17:25
20116_2	21001	Smoking status: Current	Body mass index (BMI)	18	31	6.71952e-05	0.132252	6.18361e-05	0.145773	1	0.473747	1	3.6074e-06	0.0255246			20116_2female:21001male:18:31
20116_2	21001	Smoking status: Current	Body mass index (BMI)	19	3	0.000101202	0.0727611	0.000281063	0.0156833	1	0.636764	1	5.26143e-05	0.0371959	ENSG00000185988.7,ENSG00000181588.15,ENSG00000071655.13,ENSG00000267059.2,ENSG00000127540.7,ENSG00000071564.10,ENSG00000205922.4,ENSG00000130270.12,ENSG00000079313.7,ENSG00000129911.4,ENSG00000129968.11,ENSG00000227500.5,ENSG00000213638.4,ENSG00000133275.11,ENSG00000133243.4,ENSG00000099875.10,ENSG00000172081.9,ENSG00000099840.9,ENSG00000065000.11,ENSG00000104885.13,ENSG00000104886.5	PLK5,MEX3D,MBD3,UQCR11,UQCR11,TCF3,ONECUT3,ATP8B3,REXO1,KLF16,ABHD17A,SCAMP4,ADAT3,CSNK1G2,BTBD2,MKNK2,MOB3A,IZUMO4,AP3D1,DOT1L,PLEKHJ1	20116_2female:21001male:19:3
20116_2	2139	Smoking status: Current	Age first had sexual intercourse	4	132	6.28411e-05	0.398381	0.000275315	0	-1	-1	-0.540354	0.000174759	0.0422889	ENSG00000151014.4,ENSG00000109381.15,ENSG00000137463.4,ENSG00000109390.7,ENSG00000164134.8,ENSG00000172007.5,ENSG00000145391.9,ENSG00000085871.4,ENSG00000196782.8	CCRN4L,ELF2,MGARP,NDUFC1,NAA15,RAB33B,SETD7,MGST2,MAML3	20116_2female:2139male:4:132
20116_2	2139	Smoking status: Current	Age first had sexual intercourse	5	75	0.000126141	0.0270188	8.11431e-05	0.190384	-1	-1	-0.424542	1.23196e-05	0.0328404	ENSG00000081189.9	MEF2C	20116_2female:2139male:5:75
20116_2	2139	Smoking status: Current	Age first had sexual intercourse	6	46	2.57365e-05	0.552346	0.000130058	0.00624046	-1	-1	-0.345135	0.000133772	0.0405803	ENSG00000244067.1,ENSG00000243955.1,ENSG00000182793.6,ENSG00000174156.9,ENSG00000170899.6,ENSG00000112144.11,ENSG00000112146.12,ENSG00000137270.10,ENSG00000012660.9	GSTA2,GSTA1,GSTA5,GSTA3,GSTA4,ICK,FBXO9,GCM1,ELOVL5	20116_2female:2139male:6:46
20116_2	2139	Smoking status: Current	Age first had sexual intercourse	8	17	3.6528e-05	0.357442	0.000355142	0	-1	-1	-0.144714	5.60834e-06	0.0274725	ENSG00000173273.11	TNKS	20116_2female:2139male:8:17
20116_2	2139	Smoking status: Current	Age first had sexual intercourse	8	70	5.1344e-05	0	7.62649e-05	0.372568	-1	-1	-0.263926	1.86444e-06	0.0211376	ENSG00000180828.1,ENSG00000172817.3	BHLHE22,CYP7B1	20116_2female:2139male:8:70
20116_2	2139	Smoking status: Current	Age first had sexual intercourse	10	13	3.763e-05	0.456056	0.000234814	0.0353496	-1	-1	-0.307531	6.13437e-06	0.0278471			20116_2female:2139male:10:13
20116_2	2139	Smoking status: Current	Age first had sexual intercourse	10	60	0.000201074	0.0534255	0.000209651	0.132748	-1	-1	-0.682768	0.000109035	0.039273	ENSG00000072422.12,ENSG00000196932.7,ENSG00000183346.6,ENSG00000150347.10,ENSG00000182010.6	RHOBTB1,TMEM26,C10orf107,ARID5B,RTKN2	20116_2female:2139male:10:60
20116_2	2139	Smoking status: Current	Age first had sexual intercourse	12	70	2.33758e-05	0.421356	0.00035553	0	-1	-1	-0.569157	7.2172e-05	0.0385013	ENSG00000253719.2	ATXN7L3B	20116_2female:2139male:12:70
20116_2	2139	Smoking status: Current	Age first had sexual intercourse	13	61	8.22663e-05	0.319165	4.11116e-05	0.46358	-1	-1	-0.106111	0.00021647	0.0440092	ENSG00000178235.6	SLITRK1	20116_2female:2139male:13:61
20116_2	2149	Smoking status: Current	Lifetime number of sexual partners	2	153	9.92208e-06	0.797869	0.000108332	0.215105	1	0.176918	1	3.48146e-06	0.0251331	ENSG00000172292.10,ENSG00000163072.10,ENSG00000152253.4,ENSG00000152254.6,ENSG00000073734.8,ENSG00000073737.12	CERS6,NOSTRIN,SPC25,G6PC2,ABCB11,DHRS9	20116_2female:2149male:2:153
20116_2	2149	Smoking status: Current	Lifetime number of sexual partners	8	17	3.6528e-05	0.357442	0.000179618	0.000353555	1	0.00470047	1	5.02377e-05	0.037033	ENSG00000173273.11	TNKS	20116_2female:2149male:8:17
20116_2	2149	Smoking status: Current	Lifetime number of sexual partners	11	52	1.71811e-05	0.504738	5.73121e-05	0.166553	1	0.373537	1	1.8233e-05	0.0331133	ENSG00000258817.1,ENSG00000221954.2	OR4C13,OR4C12	20116_2female:2149male:11:52
20116_2	2149	Smoking status: Current	Lifetime number of sexual partners	16	5	4.75706e-05	0.449851	0.000104343	0.379926	-1	-1	-0.00650065	6.49525e-05	0.0381041	ENSG00000140623.9,ENSG00000267795.1,ENSG00000067836.8,ENSG00000140632.12,ENSG00000118900.10,ENSG00000118898.11,ENSG00000103184.7,ENSG00000103174.7,ENSG00000033011.7,ENSG00000153446.11,ENSG00000118894.10	SEPT12,SMIM22,ROGDI,GLYR1,UBN1,PPL,SEC14L5,NAGPA,ALG1,C16orf89,FAM86A	20116_2female:2149male:16:5
20116_2	22501	Smoking status: Current	Year ended full time education	1	40	0.000205029	0.000705482	0.000123216	0.515747	-1	-1	-0.186319	6.73304e-05	0.0381123	ENSG00000186973.6,ENSG00000117395.6,ENSG00000243710.3,ENSG00000179178.6,ENSG00000253313.1,ENSG00000066056.9,ENSG00000117400.10,ENSG00000117399.9,ENSG00000066322.8,ENSG00000159479.12,ENSG00000198198.9,ENSG00000178922.12,ENSG00000142949.12,ENSG00000066135.8,ENSG00000126091.15,ENSG00000117407.12,ENSG00000117408.6,ENSG00000132768.9,ENSG00000117410.9,ENSG00000117411.12,ENSG00000159214.8,ENSG0000019651…	FAM183A,EBNA1BP2,WDR65,TMEM125,C1orf210,TIE1,MPL,CDC20,ELOVL1,MED8,SZT2,HYI,PTPRF,KDM4A,ST3GAL3,ARTN,IPO13,DPH2,ATP6V0B,B4GALT2,CCDC24,SLC6A9,KLF17,DMAP1,ERI3,RNF220,TMEM53	20116_2female:22501male:1:40
20116_2	22501	Smoking status: Current	Year ended full time education	2	97	4.03662e-05	0.217535	0.000332975	0.0890947	-1	-1	-0.122312	6.23109e-05	0.0378636	ENSG00000170500.8,ENSG00000269383.1,ENSG00000115526.6,ENSG00000204640.1,ENSG00000115539.9	LONRF2,AC012493.2,CHST10,NMS,PDCL3	20116_2female:22501male:2:97
20116_2	22501	Smoking status: Current	Year ended full time education	7	36	0.000159444	0	0.000190604	0.287479	-1	-1	-0.353335	7.49542e-05	0.0387441	ENSG00000154678.12	PDE1C	20116_2female:22501male:7:36
20116_2	23105	Smoking status: Current	Basal metabolic rate	2	1	5.29232e-05	0.298173	0.00112467	0.000260474	1	0.644764	1	3.76497e-05	0.0361895	ENSG00000184731.5,ENSG00000035115.17,ENSG00000143727.11,ENSG00000189292.11,ENSG00000151353.10	FAM110C,SH3YL1,ACP1,FAM150B,TMEM18	20116_2female:23105male:2:1
20116_2	23105	Smoking status: Current	Basal metabolic rate	8	72	7.23553e-05	0.109601	9.28083e-05	0.0869109	1	0.492749	1	0.000330169	0.048946	ENSG00000147573.12,ENSG00000147571.3,ENSG00000179041.2,ENSG00000147576.11,ENSG00000169085.7,ENSG00000185697.12,ENSG00000175073.7,ENSG00000270024.1,ENSG00000213865.3,ENSG00000104205.8,ENSG00000178460.13,ENSG00000261787.1,ENSG00000178125.10,ENSG00000121022.9,ENSG00000104218.9,ENSG00000066777.4,ENSG00000165078.7	TRIM55,CRH,RRS1,ADHFE1,C8orf46,MYBL1,VCPIP1,C8orf44-SGK3,C8orf44,SGK3,MCMDC2,TCF24,PPP1R42,COPS5,CSPP1,ARFGEF1,CPA6	20116_2female:23105male:8:72
20116_2	23105	Smoking status: Current	Basal metabolic rate	16	26	2.73824e-05	0.580482	0.000325278	5.3076e-05	1	0.308931	1	7.784e-06	0.0298892	ENSG00000077235.13,ENSG00000047578.8,ENSG00000169181.8,ENSG00000169180.7,ENSG00000188322.4,ENSG00000198156.6,ENSG00000205609.8,ENSG00000233232.2,ENSG00000261832.1,ENSG00000188603.12,ENSG00000184730.6,ENSG00000197272.2,ENSG00000176046.7,ENSG00000176476.4,ENSG00000197165.6,ENSG00000196502.7,ENSG00000255524.3,ENSG00000184110.10,ENSG00000196993.4,ENSG00000168488.14,ENSG00000178952.4,ENSG00000178188.1…	GTF3C1,KIAA0556,GSG1L,XPO6,SBK1,NPIPB6,EIF3CL,NPIPB7,CLN3,CLN3,APOBR,IL27,NUPR1,CCDC101,SULT1A2,SULT1A1,NPIPB8,EIF3C,NPIPB9,ATXN2L,TUFM,SH2B1,ATP2A1,RABEP2,CD19,NFATC2IP,SPNS1,LAT	20116_2female:23105male:16:26
20116_2	50	Smoking status: Current	Standing height	4	97	1.06736e-05	0.687441	0.000312623	0.000368441	1	0.0459046	1	5.0892e-06	0.026979	ENSG00000138821.8,ENSG00000109320.7,ENSG00000109323.4,ENSG00000109332.15,ENSG00000145354.5,ENSG00000164037.12,ENSG00000164038.10,ENSG00000164039.10,ENSG00000138778.7	SLC39A8,NFKB1,MANBA,UBE2D3,CISD2,SLC9B1,SLC9B2,BDH2,CENPE	20116_2female:50male:4:97
20116_2	50	Smoking status: Current	Standing height	5	131	4.93844e-05	0.0359144	5.7378e-05	0.0908323	-1	-1	-0.417542	1.5894e-05	0.0328404			20116_2female:50male:5:131
20116_2	20002_1286	Smoking status: Current	Depression	16	27	5.15171e-05	0.169126	5.11383e-05	0.231369	-1	-1	-0.122312	0.000160998	0.0417794	ENSG00000196796.4,ENSG00000254206.1,ENSG00000261740.1,ENSG00000183336.7,ENSG00000181625.13,ENSG00000213648.6,ENSG00000258150.1,ENSG00000169203.12,ENSG00000197471.7,ENSG00000103485.13,ENSG00000185905.3,ENSG00000174992.6,ENSG00000079616.8,ENSG00000103495.9,ENSG00000167371.12,ENSG00000185928.7,ENSG00000263136.2,ENSG00000013364.14,ENSG00000103502.9,ENSG00000174938.10,ENSG00000174939.6,ENSG00000174943…	CTB-134H23.2,NPIPB11,RP11-345J4.5,BOLA2,SLX1B,SULT1A4,RP11-345J4.3,RP11-231C14.4,SPN,QPRT,C16orf54,ZG16,KIF22,MAZ,PRRT2,PAGR1,PAGR1,MVP,CDIPT,SEZ6L2,ASPHD1,KCTD13,TMEM219,TAOK2,HIRIP3,INO80E,DOC2A,C16orf92,FAM57B,ALDOA,PPP4C,TBX6,YPEL3,GDPD3,MAPK3,CORO1A,BOLA2B,SLX1A,SULT1A3,RP11-347C12.3,RP11-347C12.1,CD2BP2,TBC1D10B,MYLPF,ZNF48,SEPT1,SEPT1,ZNF771,DCTPP1,SEPHS2,ITGAL,ZNF768,ZNF747,ZNF747,AC00231…	20116_2female:20002_1286male:16:27
2040	20458	Risk taking	General happiness	15	52	7.94932e-05	0.0720507	0.000105633	0.265247	-1	-1	-0.0391039	3.74169e-05	0.0361699	ENSG00000073417.10,ENSG00000170776.15,ENSG00000183655.11	PDE8A,AKAP13,KLHL25	2040female:20458male:15:52
2040	20458	Risk taking	General happiness	17	25	1.92683e-05	0.560707	0.000342081	0.0329217	-1	-1	-0.0363036	0.000261187	0.0458775	ENSG00000228768.1,ENSG00000172301.6,ENSG00000108651.5,ENSG00000178691.6,ENSG00000185158.8,ENSG00000214708.4,ENSG00000126858.12,ENSG00000269402.1,ENSG00000141314.8,ENSG00000108666.5,ENSG00000010244.12,ENSG00000108671.5,ENSG00000176749.4,ENSG00000176658.12,ENSG00000006042.7	AC003101.1,COPRS,UTP6,SUZ12,LRRC37B,AC090616.2,RHOT1,AC116407.2,RHBDL3,C17orf75,ZNF207,PSMD11,CDK5R1,MYO1D,TMEM98	2040female:20458male:17:25
2040	20458	Risk taking	General happiness	17	31	4.2036e-05	0.262462	0.000506462	0.00947959	1	0.0859086	1	0.000153337	0.0413864	ENSG00000141750.6,ENSG00000108306.7,ENSG00000125686.7,ENSG00000167258.9,ENSG00000171532.4,ENSG00000131771.9,ENSG00000131748.11,ENSG00000173991.5,ENSG00000141744.3,ENSG00000161395.8,ENSG00000141736.9,ENSG00000141741.7,ENSG00000141738.9,ENSG00000161405.12,ENSG00000186075.8,ENSG00000073605.14,ENSG00000172057.5,ENSG00000204913.5,ENSG00000167914.6,ENSG00000108344.10,ENSG00000108342.8,ENSG00000008838.1…	STAC2,FBXL20,MED1,CDK12,NEUROD2,PPP1R1B,STARD3,TCAP,PNMT,PGAP3,ERBB2,MIEN1,GRB7,IKZF3,ZPBP2,GSDMB,ORMDL3,LRRC3C,GSDMA,PSMD3,CSF3,MED24,THRA,NR1D1,MSL1,CASC3,RAPGEFL1,WIPF2,CDC6,RARA,CTD-2267D19.3,GJD3,TOP2A,IGFBP4,TNS4,CCR7,SMARCE1,KRT222,KRT222,KRT24	2040female:20458male:17:31
2040	21001	Risk taking	Body mass index (BMI)	3	130	2.3743e-05	0.665553	0.000256853	0.00842593	1	0.356736	1	0.000190284	0.0428134	ENSG00000144891.13,ENSG00000153002.7,ENSG00000163751.3	AGTR1,CPB1,CPA3	2040female:21001male:3:130
2040	21001	Risk taking	Body mass index (BMI)	8	20	3.51109e-05	0.364145	0.000239496	2.8546e-05	1	0.0849085	1	5.50926e-05	0.0375025	ENSG00000136574.13,ENSG00000255394.2,ENSG00000154328.11,ENSG00000079459.8,ENSG00000255046.1,ENSG00000164733.16,ENSG00000205884.2,ENSG00000205883.2,ENSG00000205882.4,ENSG00000255098.1	GATA4,C8orf49,NEIL2,FDFT1,RP11-297N6.4,CTSB,DEFB136,DEFB135,DEFB134,RP11-481A20.11	2040female:21001male:8:20
2040	21001	Risk taking	Body mass index (BMI)	9	71	3.05991e-05	0.0795546	3.09344e-05	0.174263	1	0.115512	1	1.26778e-05	0.0328404	ENSG00000196305.13,ENSG00000198000.7,ENSG00000188312.9,ENSG00000106809.6,ENSG00000127083.7,ENSG00000106819.7,ENSG00000106823.8,ENSG00000127080.5,ENSG00000185963.9,ENSG00000127081.9,ENSG00000127084.13,ENSG00000157303.6	IARS,NOL8,CENPP,OGN,OMD,ASPN,ECM2,IPPK,BICD2,ZNF484,FGD3,SUSD3	2040female:21001male:9:71
2040	21001	Risk taking	Body mass index (BMI)	12	93	3.79491e-05	0.277202	4.9338e-05	0.252893	1	0.224122	1	2.43702e-05	0.0344835	ENSG00000166211.6,ENSG00000196091.8,ENSG00000111666.6,ENSG00000139351.10,ENSG00000111670.10,ENSG00000136048.9,ENSG00000120860.6,ENSG00000075188.4,ENSG00000185480.7,ENSG00000183395.4,ENSG00000017427.11	SPIC,MYBPC1,CHPT1,SYCP3,GNPTAB,DRAM1,CCDC53,NUP37,PARPBP,PMCH,IGF1	2040female:21001male:12:93
2040	2149	Risk taking	Lifetime number of sexual partners	5	139	0.000112955	0.0462722	0.000255524	0	1	0.311331	1	0.000324799	0.0487154			2040female:2149male:5:139
2040	2149	Risk taking	Lifetime number of sexual partners	10	27	0.000118072	0.0774494	4.14326e-05	0.421332	1	0.357336	1	3.03798e-05	0.035163	ENSG00000148450.8,ENSG00000168267.5,ENSG00000204566.6,ENSG00000179133.7,ENSG00000165312.5	MSRB2,PTF1A,C10orf115,C10orf67,OTUD1	2040female:2149male:10:27
2040	23105	Risk taking	Basal metabolic rate	8	20	3.51109e-05	0.364145	0.000172475	0.0001333	1	0.134713	1	2.66607e-05	0.0347815	ENSG00000136574.13,ENSG00000255394.2,ENSG00000154328.11,ENSG00000079459.8,ENSG00000255046.1,ENSG00000164733.16,ENSG00000205884.2,ENSG00000205883.2,ENSG00000205882.4,ENSG00000255098.1	GATA4,C8orf49,NEIL2,FDFT1,RP11-297N6.4,CTSB,DEFB136,DEFB135,DEFB134,RP11-481A20.11	2040female:23105male:8:20
2040	23105	Risk taking	Basal metabolic rate	12	62	7.28912e-05	0.355753	0.00206919	0.0007457	1	0.620762	1	0.000186587	0.0426843	ENSG00000149948.9,ENSG00000197301.3,ENSG00000267942.1,ENSG00000139233.2,ENSG00000228144.2,ENSG00000155957.12,ENSG00000090376.4,ENSG00000127311.5	HMGA2,RP11-366L20.2,AC090673.2,LLPH,TMBIM4,TMBIM4,IRAK3,HELB	2040female:23105male:12:62
2040	23105	Risk taking	Basal metabolic rate	12	70	2.25949e-05	0.408729	6.42472e-05	0.113728	-1	-1	-0.00270027	8.68821e-05	0.0387952	ENSG00000253719.2	ATXN7L3B	2040female:23105male:12:70
2040	23105	Risk taking	Basal metabolic rate	14	69	6.40993e-05	0.441648	7.38883e-05	0.457025	-1	-1	-0.0357036	5.70191e-05	0.0375025	ENSG00000258572.1,ENSG00000182512.4,ENSG00000213231.8,ENSG00000100721.6,ENSG00000227051.4,ENSG00000168398.5,ENSG00000258691.1,ENSG00000100739.6,ENSG00000258729.1,ENSG00000066739.7,ENSG00000100744.10,ENSG00000140057.4,ENSG00000090060.13	RP11-1070N10.3,GLRX5,TCL1B,TCL1A,C14orf132,BDKRB2,RP11-404P21.8,BDKRB1,DKFZP434O1614,ATG2B,GSKIP,AK7,PAPOLA	2040female:23105male:14:69
2040	3526	Risk taking	Mother's age at death	6	95	0.000105132	0.0539292	3.8618e-05	0.731516	1	0.0213021	1	5.56746e-05	0.0375025	ENSG00000085382.7,ENSG00000187772.6,ENSG00000112276.9,ENSG00000132429.5,ENSG00000085377.9	HACE1,LIN28B,BVES,POPDC3,PREP	2040female:3526male:6:95
2040	3526	Risk taking	Mother's age at death	20	18	6.69051e-05	0.363032	7.83669e-05	0.454455	1	0.40174	1	0.000327502	0.0487623	ENSG00000089177.13	KIF16B	2040female:3526male:20:18
2040	50	Risk taking	Standing height	4	28	4.54932e-05	0.295837	7.81698e-05	0.108896	-1	-1	-0.339134	1.46187e-05	0.0328404	ENSG00000109610.5,ENSG00000181982.13,ENSG00000153012.7,ENSG00000109618.7,ENSG00000038210.9,ENSG00000168228.10,ENSG00000053900.6,ENSG00000157765.7	SOD3,CCDC149,LGI2,SEPSECS,PI4K2B,ZCCHC4,ANAPC4,SLC34A2	2040female:50male:4:28
2040	924	Risk taking	Usual walking pace	9	79	2.41738e-05	0.641077	7.77831e-05	0.32718	-1	-1	-0.0707071	0.000269858	0.0461493	ENSG00000165152.4,ENSG00000155827.7,ENSG00000198785.4,ENSG00000188386.5	TMEM246,RNF20,GRIN3A,PPP3R2	2040female:924male:9:79
2040	I9_CHD	Risk taking	Major coronary heart disease event	7	81	6.1354e-05	0.00938441	1.61897e-05	0.693435	1	0.120312	1	3.34065e-05	0.0351742	ENSG00000153993.9	SEMA3D	2040female:I9_CHDmale:7:81
2040	I9_CHD	Risk taking	Major coronary heart disease event	14	37	0.000150486	0.0318767	3.45552e-05	0.465888	1	0.287529	1	0.000202482	0.0435937	ENSG00000139971.11,ENSG00000131966.9,ENSG00000100567.8,ENSG00000268466.1,ENSG00000032219.14,ENSG00000196860.3,ENSG00000100575.9,ENSG00000100578.10,ENSG00000165617.10	C14orf37,ACTR10,PSMA3,AL132989.1,ARID4A,TOMM20L,TIMM9,KIAA0586,DACT1	2040female:I9_CHDmale:14:37
2040	I9_CHD	Risk taking	Major coronary heart disease event	15	57	0.000112587	0.0971253	0.000204071	0.092803	-1	-1	-0.672567	0.000124061	0.0402744	ENSG00000185033.10,ENSG00000185043.6,ENSG00000183208.8,ENSG00000213471.4,ENSG00000261147.1,ENSG00000182768.7,ENSG00000238244.2,ENSG00000196391.6,ENSG00000140575.8,ENSG00000140577.11,ENSG00000197299.6,ENSG00000140564.6,ENSG00000182511.7,ENSG00000196547.10,ENSG00000140553.12,ENSG00000184508.6,ENSG00000166965.8,ENSG00000198901.9,ENSG00000184056.10	SEMA4B,CIB1,GDPGP1,TTLL13,RP11-697E2.6,NGRN,GABARAPL3,ZNF774,IQGAP1,CRTC3,BLM,FURIN,FES,MAN2A2,UNC45A,HDDC3,RCCD1,PRC1,VPS33B	2040female:I9_CHDmale:15:57
2040	20002_1223	Risk taking	Type 2 diabetes	17	2	0.000115628	0.0868371	5.98202e-05	0.318073	-1	-1	-0.121712	9.33992e-05	0.0388849	ENSG00000177370.4,ENSG00000159842.10,ENSG00000205899.3,ENSG00000184811.3,ENSG00000108953.12,ENSG00000167193.7,ENSG00000197879.10,ENSG00000132376.15,ENSG00000174238.10	TIMM22,ABR,BHLHA9,TUSC5,YWHAE,CRK,MYO1C,INPP5K,PITPNA	2040female:20002_1223male:17:2
2040	20002_1286	Risk taking	Depression	2	110	8.10917e-05	0.209221	0.000136446	0.195514	1	0.80078	1	1.51954e-05	0.0328404	ENSG00000088205.8	DDX18	2040female:20002_1286male:2:110
2040	20002_1291	Risk taking	Mania/Bipolar disorder	1	46	0.000101941	0.143482	4.24519e-05	0.375963	1	0.0787079	1	7.06834e-05	0.0383858	ENSG00000162377.4,ENSG00000162378.8,ENSG00000203995.5,ENSG00000121310.12,ENSG00000116171.12,ENSG00000174348.9,ENSG00000162383.7,ENSG00000157184.5,ENSG00000162384.9,ENSG00000162385.6,ENSG00000157193.10,ENSG00000143006.7,ENSG00000174332.3,ENSG00000058804.10,ENSG00000058799.9,ENSG00000211452.6,ENSG00000081870.7,ENSG00000116212.10,ENSG00000203985.6,ENSG00000116209.7,ENSG00000116205.6,ENSG00000212670.…	COA7,ZYG11B,ZYG11A,ECHDC2,SCP2,PODN,SLC1A7,CPT2,C1orf123,MAGOH,LRP8,DMRTB1,GLIS1,NDC1,YIPF1,DIO1,HSPB11,LRRC42,LDLRAD1,TMEM59,TCEANC2,AL161915.1,CDCP2,RP11-446E24.4,AL357673.1,CYB5RL,MRPL37,SSBP3-AS1	2040female:20002_1291male:1:46
20458	21001	General happiness	Body mass index (BMI)	5	86	3.92133e-05	0.226085	6.73846e-05	0.0159898	-1	-1	-0.142514	6.69274e-05	0.0381123	ENSG00000205359.5,ENSG00000145730.16,ENSG00000145723.12,ENSG00000145725.15,ENSG00000181751.5,ENSG00000112874.5	SLCO6A1,PAM,GIN1,PPIP5K2,C5orf30,NUDT12	20458female:21001male:5:86
20458	23105	General happiness	Basal metabolic rate	5	61	7.03711e-05	0.601686	0.00012331	0.420833	-1	-1	-0.214521	6.97773e-05	0.0383365	ENSG00000113048.12,ENSG00000049883.10,ENSG00000178175.7,ENSG00000083312.13,ENSG00000157107.9,ENSG00000157111.8,ENSG00000164325.7,ENSG00000251493.2,ENSG00000145741.11,ENSG00000164331.5,ENSG00000164338.5,ENSG00000268217.1,ENSG00000214944.5	MRPS27,PTCD2,ZNF366,TNPO1,FCHO2,TMEM171,TMEM174,FOXD1,BTF3,ANKRA2,UTP15,AC008387.1,ARHGEF28	20458female:23105male:5:61
20458	3526	General happiness	Mother's age at death	8	13	0.000156001	0.164863	0.00014073	0	-1	-1	-0.0859086	0.000175098	0.0422889	ENSG00000147316.8,ENSG00000091879.9,ENSG00000155189.7	MCPH1,ANGPT2,AGPAT5	20458female:3526male:8:13
20458	50	General happiness	Standing height	8	92	0.000102719	0.688405	0.000126913	0.115488	1	0.286129	1	3.00088e-05	0.035163	ENSG00000180694.9,ENSG00000123119.7,ENSG00000253250.2,ENSG00000155099.3,ENSG00000155100.6,ENSG00000214954.4,ENSG00000147606.4	TMEM64,NECAB1,C8orf88,TMEM55A,OTUD6B,LRRC69,SLC26A7	20458female:50male:8:92
20458	50	General happiness	Standing height	10	79	4.97143e-05	0.626451	0.000102711	0.202247	1	0.126513	1	6.83506e-06	0.0287324			20458female:50male:10:79
20458	924	General happiness	Usual walking pace	11	110	0.000124591	0.187143	0.000138853	0.0961619	-1	-1	-0.319732	0.00013334	0.0405803	ENSG00000149294.12,ENSG00000149292.12,ENSG00000170209.4,ENSG00000149295.9,ENSG00000166682.6,ENSG00000086827.4,ENSG00000228607.2,ENSG00000048028.7,ENSG00000149305.2,ENSG00000166736.7	NCAM1,TTC12,ANKK1,DRD2,TMPRSS5,ZW10,CLDN25,USP28,HTR3B,HTR3A	20458female:924male:11:110
20458	20002_1286	General happiness	Depression	1	178	3.54928e-05	0.793146	8.2859e-05	0.193243	-1	-1	-0.0869087	0.000162203	0.0417927	ENSG00000177800.2,ENSG00000168118.7,ENSG00000213029.2,ENSG00000154429.6,ENSG00000143632.10,ENSG00000069248.9,ENSG00000135776.4,ENSG00000135801.5,ENSG00000135763.5	TMEM78,RAB4A,SPHAR,CCSAP,ACTA1,NUP133,ABCB10,TAF5L,URB2	20458female:20002_1286male:1:178
21001	2139	Body mass index (BMI)	Age first had sexual intercourse	1	195	0.000244735	0.000919439	0.00032149	0.0231836	-1	-1	-0.618162	0.000161431	0.0417794	ENSG00000143702.11,ENSG00000269795.1,ENSG00000054282.11,ENSG00000117020.12,ENSG00000179456.9,ENSG00000268146.1,ENSG00000173728.6,ENSG00000035687.9	CEP170,AC092782.1,SDCCAG8,AKT3,ZBTB18,AL590483.1,C1orf100,ADSS	21001female:2139male:1:195
21001	2139	Body mass index (BMI)	Age first had sexual intercourse	3	44	0.000783373	0.000772012	0.000538094	0.00310562	-0.930393	-1	-0.636764	0.000163301	0.0418972	ENSG00000114646.5,ENSG00000173473.6,ENSG00000132153.10,ENSG00000047849.17,ENSG00000164045.7,ENSG00000164047.3,ENSG00000164048.9,ENSG00000172113.4,ENSG00000229453.1,ENSG00000164049.10,ENSG00000164050.8,ENSG00000164051.9,ENSG00000232112.3,ENSG00000164053.13,ENSG00000213689.5,ENSG00000164054.11,ENSG00000114268.7,ENSG00000145040.3,ENSG00000114270.11,ENSG00000010256.6,ENSG00000183396.3,ENSG00000225697…	CSPG5,SMARCC1,DHX30,MAP4,CDC25A,CAMP,ZNF589,NME6,SPINK8,FBXW12,PLXNB1,CCDC51,TMA7,ATRIP,TREX1,SHISA5,PFKFB4,UCN2,COL7A1,UQCRC1,TMEM89,SLC26A6,CELSR3,NCKIPSD,IP6K2,PRKAR2A,SLC25A20,ARIH2OS,ARIH2,P4HTM,WDR6,DALRD3,NDUFAF3,IMPDH2,QRICH1,QARS,USP19,LAMB2,CCDC71,KLHDC8B,C3orf84,CCDC36,RP11-3B7.1,C3orf62,USP4,GPX1,RHOA,TCTA,AMT,NICN1,DAG1,BSN,APEH,MST1,RNF123,AMIGO3,GMPPB,IP6K1,CDHR4,FAM212A,UBA7,TRAIP…	21001female:2139male:3:44
21001	2139	Body mass index (BMI)	Age first had sexual intercourse	3	136	0.000122429	0.0300133	0.000129113	0.0382616	-1	-1	-0.109511	7.40548e-05	0.0387339	ENSG00000114805.12,ENSG00000214919.2,ENSG00000174928.11,ENSG00000169359.9,ENSG00000163655.11	PLCH1,AC104472.1,C3orf33,SLC33A1,GMPS	21001female:2139male:3:136
21001	2139	Body mass index (BMI)	Age first had sexual intercourse	5	38	0.000149347	0.0197992	2.99799e-05	0.665496	1	0.254725	1	2.62279e-05	0.0347075	ENSG00000182836.5,ENSG00000083720.8,ENSG00000205765.4,ENSG00000151876.8,ENSG00000112964.9,ENSG00000198865.5	PLCXD3,OXCT1,C5orf51,FBXO4,GHR,CCDC152	21001female:2139male:5:38
21001	2139	Body mass index (BMI)	Age first had sexual intercourse	7	15	0.000121621	0.0903811	0.000121478	0.0438558	-1	-1	-0.673567	0.000207746	0.0437892	ENSG00000189043.5,ENSG00000106443.10	NDUFA4,PHF14	21001female:2139male:7:15
21001	2139	Body mass index (BMI)	Age first had sexual intercourse	8	19	0.000184162	7.19337e-06	0.000221257	1.88288e-06	-1	-1	-0.413541	1.6896e-05	0.0329248	ENSG00000171060.6,ENSG00000171056.6,ENSG00000258724.1,ENSG00000254093.4,ENSG00000171044.6,ENSG00000215346.3,ENSG00000104643.5,ENSG00000177710.5,ENSG00000184608.4,ENSG00000154319.10,ENSG00000136573.8	C8orf74,SOX7,SOX7,PINX1,XKR6,AF131215.5,MTMR9,SLC35G5,C8orf12,FAM167A,BLK	21001female:2139male:8:19
21001	2139	Body mass index (BMI)	Age first had sexual intercourse	14	2	8.26159e-05	0.465056	0.000127494	0.206505	-1	-1	-0.424142	0.00030049	0.0475533	ENSG00000185271.6,ENSG00000092094.6,ENSG00000100823.7,ENSG00000165782.6,ENSG00000198805.7,ENSG00000182545.6,ENSG00000188655.6,ENSG00000259060.2,ENSG00000173464.10,ENSG00000258436.1,ENSG00000181803.3,ENSG00000258818.2,ENSG00000214274.5,ENSG00000259171.1,ENSG00000181562.2,ENSG00000181552.3,ENSG00000169413.2,ENSG00000129538.9,ENSG00000169397.3,ENSG00000169385.2,ENSG00000165792.13,ENSG00000165794.5,E…	KLHL33,OSGEP,APEX1,TMEM55B,PNP,RNASE10,RNASE9,RNASE11,RNASE11,RNASE12,OR6S1,RNASE4,ANG,AL163636.6,EDDM3A,EDDM3B,RNASE6,RNASE1,RNASE3,RNASE2,METTL17,SLC39A2,NDRG2,TPPP2,RP11-998D10.1,RNASE13,RNASE7,RNASE8,ARHGEF40,ZNF219,TMEM253,OR5AU1,HNRNPC,RPGRIP1,SUPT16H,CHD8,RAB2B,TOX4,METTL3	21001female:2139male:14:2
21001	2139	Body mass index (BMI)	Age first had sexual intercourse	14	67	0.000212288	0.00124254	0.000153828	0.00669516	-1	-1	-0.609561	3.3541e-06	0.0251331	ENSG00000100604.8,ENSG00000100605.12,ENSG00000165943.4,ENSG00000153485.5,ENSG00000259066.1,ENSG00000170270.4,ENSG00000012963.9,ENSG00000011114.10,ENSG00000133958.9,ENSG00000187581.2,ENSG00000175785.8,ENSG00000140067.6,ENSG00000100628.7,ENSG00000258987.1,ENSG00000089723.5,ENSG00000089737.11,ENSG00000165948.6,ENSG00000165949.8,ENSG00000119632.3,ENSG00000119698.7,ENSG00000140093.5,ENSG00000170099.5,…	CHGA,ITPK1,MOAP1,TMEM251,RP11-371E8.4,C14orf142,UBR7,BTBD7,UNC79,COX8C,PRIMA1,FAM181A,ASB2,RP11-131H24.4,OTUB2,DDX24,IFI27L1,IFI27,IFI27L2,PPP4R4,SERPINA10,SERPINA6,SERPINA1	21001female:2139male:14:67
21001	2139	Body mass index (BMI)	Age first had sexual intercourse	15	42	0.000448025	0.000534057	6.21579e-05	0.349681	-1	-1	-0.375338	6.09606e-05	0.0378583	ENSG00000138622.3,ENSG00000183324.6,ENSG00000156642.12,ENSG00000103855.13,ENSG00000205363.4,ENSG00000167139.4,ENSG00000129038.11,ENSG00000067221.9,ENSG00000140464.15,ENSG00000159289.6,ENSG00000167178.11,ENSG00000248540.2	HCN4,C15orf60,NPTN,CD276,C15orf59,TBC1D21,LOXL1,STOML1,PML,GOLGA6A,ISLR2,RP11-247C2.2	21001female:2139male:15:42
21001	2139	Body mass index (BMI)	Age first had sexual intercourse	15	48	0.000305611	0.00795344	0.000226335	0.00915302	-1	-1	-0.610961	0.000277834	0.0465305	ENSG00000136371.5,ENSG00000259332.2,ENSG00000180953.7,ENSG00000259642.1,ENSG00000257028.1,ENSG00000140379.7,ENSG00000086666.14,ENSG00000103876.7,ENSG00000259495.1,ENSG00000172379.14,ENSG00000136379.7	MTHFS,ST20-MTHFS,ST20,C15orf37,C15ORF37,BCL2A1,ZFAND6,FAH,RP11-210M15.2,ARNT2,ABHD17C	21001female:2139male:15:48
21001	2139	Body mass index (BMI)	Age first had sexual intercourse	21	16	0.000117076	0.00875023	9.19699e-05	0.0960282	-1	-1	-0.307931	0.000176299	0.0423525	ENSG00000156239.7,ENSG00000198862.9,ENSG00000156253.2,ENSG00000156256.10,ENSG00000156261.8,ENSG00000156265.11	N6AMT1,LTN1,RWDD2B,USP16,CCT8,MAP3K7CL	21001female:2139male:21:16
21001	2139	Body mass index (BMI)	Age first had sexual intercourse	21	27	0.000128821	0.100946	0.000142098	0.141739	-1	-1	-0.470347	0.000321559	0.0485597	ENSG00000182240.11,ENSG00000183844.12,ENSG00000183486.8,ENSG00000157601.9,ENSG00000184012.7	BACE2,FAM3B,MX2,MX1,TMPRSS2	21001female:2139male:21:27
21001	2149	Body mass index (BMI)	Lifetime number of sexual partners	6	115	0.000339961	0.0109992	0.000114701	0.262979	1	0.146915	1	0.00021	0.0437892	ENSG00000196569.7	LAMA2	21001female:2149male:6:115
21001	2149	Body mass index (BMI)	Lifetime number of sexual partners	6	127	1.97676e-05	0.587726	0.000151351	0.0627675	-1	-1	-0.178718	6.59337e-06	0.0283456			21001female:2149male:6:127
21001	2149	Body mass index (BMI)	Lifetime number of sexual partners	8	58	6.34053e-05	0.223419	3.92602e-05	0	-1	-1	-0.0365037	1.43846e-05	0.0328404	ENSG00000168300.9,ENSG00000232941.1	PCMTD1,AC090186.1	21001female:2149male:8:58
21001	2207	Body mass index (BMI)	Wears glasses or contact lenses	2	52	0.000275356	0.000428618	1.31781e-05	0.738522	-1	-1	-0.0941094	5.28968e-05	0.0372291	ENSG00000116016.9,ENSG00000187600.8,ENSG00000250565.2,ENSG00000119729.6,ENSG00000151665.8,ENSG00000119878.5,ENSG00000171150.7,ENSG00000222005.4,ENSG00000239332.1,ENSG00000180398.7,ENSG00000068724.11	EPAS1,TMEM247,ATP6V1E2,RHOQ,PIGF,CRIPT,SOCS5,LINC01118,LINC01119,MCFD2,TTC7A	21001female:2207male:2:52
21001	2207	Body mass index (BMI)	Wears glasses or contact lenses	3	162	5.1899e-05	0.304905	8.04035e-05	0.0572131	1	0.238924	1	1.81503e-05	0.0331133	ENSG00000156931.11,ENSG00000187068.2,ENSG00000113790.6,ENSG00000073803.9,ENSG00000163900.6,ENSG00000163898.5,ENSG00000163904.8,ENSG00000073792.11,ENSG00000163915.3,ENSG00000136527.13	VPS8,C3orf70,EHHADH,MAP3K13,TMEM41A,LIPH,SENP2,IGF2BP2,C3orf65,TRA2B	21001female:2207male:3:162
21001	2207	Body mass index (BMI)	Wears glasses or contact lenses	4	123	0.000212919	0.0277382	4.64346e-05	0.484064	-1	-1	-0.351335	4.90642e-05	0.0370041	ENSG00000077684.11,ENSG00000151466.7,ENSG00000151470.8	JADE1,SCLT1,C4orf33	21001female:2207male:4:123
21001	2207	Body mass index (BMI)	Wears glasses or contact lenses	11	85	5.50995e-05	0.243241	0.000121264	0.0105178	-1	-1	-0.370937	5.02419e-05	0.037033	ENSG00000123892.7,ENSG00000109861.11	RAB38,CTSC	21001female:2207male:11:85
21001	22501	Body mass index (BMI)	Year ended full time education	8	90	6.52809e-05	0.23346	0.000229252	0.19331	-1	-1	-0.10471	3.53225e-05	0.0356499			21001female:22501male:8:90
21001	23105	Body mass index (BMI)	Basal metabolic rate	1	66	0.000124909	0.102727	0.000151509	0.0950378	1	0.618362	1	2.94285e-06	0.0245774	ENSG00000117069.10,ENSG00000142892.10	ST6GALNAC5,PIGK	21001female:23105male:1:66
21001	23105	Body mass index (BMI)	Basal metabolic rate	2	1	0.00103796	0.000301955	0.00112467	0.000260474	1	0.892189	1	2.50969e-08	0.00232464	ENSG00000184731.5,ENSG00000035115.17,ENSG00000143727.11,ENSG00000189292.11,ENSG00000151353.10	FAM110C,SH3YL1,ACP1,FAM150B,TMEM18	21001female:23105male:2:1
21001	23105	Body mass index (BMI)	Basal metabolic rate	2	157	2.24258e-05	0.472801	0.000150978	0.00632748	1	0.151315	1	0.000313914	0.0482396	ENSG00000077380.11,ENSG00000268821.1,ENSG00000115840.9,ENSG00000128708.8,ENSG00000172878.9,ENSG00000144355.10,ENSG00000115844.6	DYNC1I2,AC068039.1,SLC25A12,HAT1,METAP1D,DLX1,DLX2	21001female:23105male:2:157
21001	23105	Body mass index (BMI)	Basal metabolic rate	2	185	0.000195787	0.0206104	0.000220382	0.0589076	1	0.725773	1	6.31583e-06	0.0278973	ENSG00000144410.4,ENSG00000118263.10,ENSG00000118260.10,ENSG00000144401.10,ENSG00000163249.5,ENSG00000163251.3	CPO,KLF7,CREB1,METTL21A,CCNYL1,FZD5	21001female:23105male:2:185
21001	23105	Body mass index (BMI)	Basal metabolic rate	2	190	8.06752e-05	0.319031	0.000176191	0.0823899	1	0.467347	1	2.18493e-05	0.0340966	ENSG00000030419.12	IKZF2	21001female:23105male:2:190
21001	23105	Body mass index (BMI)	Basal metabolic rate	3	41	0.000392872	0.0130825	0.000290308	0.00782119	0.977598	0.60016	1	0.000104465	0.0391345	ENSG00000157093.4,ENSG00000114812.8,ENSG00000093183.9,ENSG00000008324.6,ENSG00000114857.13,ENSG00000114853.9,ENSG00000157119.11,ENSG00000010282.10,ENSG00000244607.1,ENSG00000181061.9,ENSG00000144648.10,ENSG00000273291.1,ENSG00000240747.3,ENSG00000180432.4,ENSG00000182983.10,ENSG00000144649.4,ENSG00000144647.5,ENSG00000163788.9,ENSG00000160746.8,ENSG00000011198.3	LYZL4,VIPR1,SEC22C,SS18L2,NKTR,ZBTB47,KLHL40,HHATL,CCDC13,HIGD1A,ACKR2,KRBOX1,KRBOX1,CYP8B1,ZNF662,FAM198A,POMGNT2,SNRK,ANO10,ABHD5	21001female:23105male:3:41
21001	23105	Body mass index (BMI)	Basal metabolic rate	3	62	0.000265938	0.0111277	0.000154259	0.100953	1	0.611561	1	0.000206097	0.0437765	ENSG00000187098.10	MITF	21001female:23105male:3:62
21001	23105	Body mass index (BMI)	Basal metabolic rate	3	75	0.000209826	0.0117464	0.000236525	0.00048669	1	0.669167	1	0.000298883	0.0474417			21001female:23105male:3:75
21001	23105	Body mass index (BMI)	Basal metabolic rate	3	116	0.000335325	8.89456e-05	0.000239153	3.94804e-05	0.950595	0.577558	1	0.00028034	0.0466442	ENSG00000014257.11	ACPP	21001female:23105male:3:116
21001	23105	Body mass index (BMI)	Basal metabolic rate	4	29	0.000143949	0.115566	0.000121621	0.351436	1	0.641564	1	2.75195e-05	0.0350292	ENSG00000250317.4,ENSG00000168214.16,ENSG00000163394.5,ENSG00000109680.6,ENSG00000109689.10	SMIM20,RBPJ,CCKAR,TBC1D19,STIM2	21001female:23105male:4:29
21001	23105	Body mass index (BMI)	Basal metabolic rate	4	82	3.31833e-05	0.649168	9.4035e-05	0.507268	1	0.0205021	1	0.000109315	0.039273	ENSG00000163624.5,ENSG00000163625.11,ENSG00000138639.13	CDS1,WDFY3,ARHGAP24	21001female:23105male:4:82
21001	23105	Body mass index (BMI)	Basal metabolic rate	5	68	0.000193447	0.0087487	0.0001947	0	1	0.462746	1	0.000123015	0.0402602	ENSG00000131730.11,ENSG00000131732.7,ENSG00000172497.4,ENSG00000145687.11,ENSG00000152348.11,ENSG00000186468.8,ENSG00000205464.7	CKMT2,ZCCHC9,ACOT12,SSBP2,ATG10,RPS23,ATP6AP1L	21001female:23105male:5:68
21001	23105	Body mass index (BMI)	Basal metabolic rate	5	80	0.000194268	0.0100354	0.000565649	0	0.988399	0.69817	1	9.03882e-06	0.0310086	ENSG00000236882.3,ENSG00000118985.10,ENSG00000175426.6,ENSG00000153113.19,ENSG00000164307.8,ENSG00000247121.2,ENSG00000164308.12,ENSG00000113441.11	C5orf27,ELL2,PCSK1,CAST,ERAP1,CTD-2260A17.2,ERAP2,LNPEP	21001female:23105male:5:80
21001	23105	Body mass index (BMI)	Basal metabolic rate	5	141	0.000761186	0.000590832	0.00062107	0.0021624	0.741174	0.409941	0.951795	0.000117323	0.0397901	ENSG00000113645.9,ENSG00000113643.4,ENSG00000188573.7,ENSG00000120137.6	WWC1,RARS,FBLL1,PANK3	21001female:23105male:5:141
21001	23105	Body mass index (BMI)	Basal metabolic rate	8	80	0.000460464	1.63085e-06	0.000213298	0.0109644	1	0.526953	1	8.92209e-06	0.0307116	ENSG00000164749.7	HNF4G	21001female:23105male:8:80
21001	23105	Body mass index (BMI)	Basal metabolic rate	8	136	0.000126176	0.143259	0.000234674	0.156867	1	0.607761	1	0.000246586	0.0452617	ENSG00000171045.10	TSNARE1	21001female:23105male:8:136
21001	23105	Body mass index (BMI)	Basal metabolic rate	9	77	0.000503514	6.65303e-05	0.000219268	0.0934666	1	0.685769	1	8.18253e-05	0.0387669	ENSG00000204291.6,ENSG00000106799.8,ENSG00000119523.8,ENSG00000106803.5,ENSG00000119508.13,ENSG00000136874.6,ENSG00000023318.7,ENSG00000119509.8,ENSG00000136891.9	COL15A1,TGFBR1,ALG2,SEC61B,NR4A3,STX17,ERP44,INVS,TEX10	21001female:23105male:9:77
21001	23105	Body mass index (BMI)	Basal metabolic rate	9	96	0.000541839	0.000141989	8.42826e-05	0.50525	1	0.59756	1	0.000341983	0.0494307	ENSG00000136869.13	TLR4	21001female:23105male:9:96
21001	23105	Body mass index (BMI)	Basal metabolic rate	9	97	0.000472203	0.000603646	0.000134752	0.253738	1	0.79778	1	4.40806e-07	0.0137266	ENSG00000078725.8,ENSG00000260970.1	BRINP1,RP11-295D22.1	21001female:23105male:9:97
21001	23105	Body mass index (BMI)	Basal metabolic rate	9	103	0.000319095	0.0191302	0.00032661	0.0241265	0.959596	0.526153	1	0.00034711	0.0495957	ENSG00000196814.10,ENSG00000136944.13,ENSG00000169155.5	MVB12B,LMX1B,ZBTB43	21001female:23105male:9:103
21001	23105	Body mass index (BMI)	Basal metabolic rate	10	108	0.000125344	0.0253586	8.81036e-05	0.0243523	1	0.638364	1	4.95836e-05	0.0370041	ENSG00000165863.12,ENSG00000165868.8,ENSG00000188316.9,ENSG00000187164.13,ENSG00000148704.8,ENSG00000186795.1,ENSG00000165646.7,ENSG00000165650.7,ENSG00000170370.10	C10orf82,HSPA12A,ENO4,KIAA1598,VAX1,KCNK18,SLC18A2,PDZD8,EMX2	21001female:23105male:10:108
21001	23105	Body mass index (BMI)	Basal metabolic rate	11	31	0.000651023	0	0.000799577	0.000177839	1	0.884588	1	2.0267e-09	0.000344164	ENSG00000129151.4,ENSG00000109881.12,ENSG00000205213.9,ENSG00000148943.7,ENSG00000176697.14,ENSG00000121621.6,ENSG00000169519.15	BBOX1,CCDC34,LGR4,LIN7C,BDNF,KIF18A,METTL15	21001female:23105male:11:31
21001	23105	Body mass index (BMI)	Basal metabolic rate	11	32	0.000264495	0.0860202	0.000531033	0.00172312	1	0.788379	1	3.01881e-05	0.035163			21001female:23105male:11:32
21001	23105	Body mass index (BMI)	Basal metabolic rate	11	46	0.000450192	0	0.000244646	0.00376027	1	0.650965	1	0.000211468	0.0438288	ENSG00000166181.8,ENSG00000052841.10,ENSG00000149084.7,ENSG00000166199.8	API5,TTC17,HSD17B12,ALKBH3	21001female:23105male:11:46
21001	23105	Body mass index (BMI)	Basal metabolic rate	12	89	0.000275459	0.0174911	0.00045923	0.171191	1	0.691169	1	8.36082e-05	0.0387952	ENSG00000188596.5,ENSG00000139350.7	C12orf55,NEDD1	21001female:23105male:12:89
21001	23105	Body mass index (BMI)	Basal metabolic rate	13	33	0.000635443	4.59538e-05	0.000380336	0.0401782	1	0.70077	1	1.94855e-05	0.0338102	ENSG00000136099.9,ENSG00000102837.6	PCDH8,OLFM4	21001female:23105male:13:33
21001	23105	Body mass index (BMI)	Basal metabolic rate	16	23	0.000337966	0.00198424	0.000339608	0.000286577	1	0.638764	1	7.63425e-05	0.0387502	ENSG00000006116.3,ENSG00000122257.14,ENSG00000090905.13,ENSG00000158865.8,ENSG00000140750.12,ENSG00000205629.7	CACNG3,RBBP6,TNRC6A,SLC5A11,ARHGAP17,LCMT1	21001female:23105male:16:23
21001	23105	Body mass index (BMI)	Basal metabolic rate	16	34	0.00229907	2.9122e-19	0.00226656	5.2829e-17	0.819582	0.664766	0.916192	4.48615e-12	2.28545e-06	ENSG00000103479.10,ENSG00000166971.12,ENSG00000103494.8,ENSG00000140718.14,ENSG00000259517.1,ENSG00000177508.11	RBL2,AKTIP,RPGRIP1L,FTO,RP11-324D17.1,IRX3	21001female:23105male:16:34
21001	23105	Body mass index (BMI)	Basal metabolic rate	16	62	0.000195751	0.038452	0.000250419	0.0421574	1	0.611361	1	0.000238571	0.0449773			21001female:23105male:16:62
21001	23105	Body mass index (BMI)	Basal metabolic rate	17	17	7.35152e-05	0.00540878	5.61686e-05	0.0874848	1	0.227723	1	3.25203e-05	0.035163	ENSG00000239704.6,ENSG00000259024.2,ENSG00000175106.12,ENSG00000181464.2,ENSG00000241322.4,ENSG00000251537.4,ENSG00000221926.7,ENSG00000187607.11,ENSG00000255104.3,ENSG00000214946.9,ENSG00000170425.3,ENSG00000214941.3,ENSG00000011295.11,ENSG00000141027.16,ENSG00000227782.1,ENSG00000108474.12,ENSG00000166582.5,ENSG00000170315.9,ENSG00000187688.10,ENSG00000181350.7	CDRT4,TVP23C-CDRT4,TVP23C,CDRT1,CDRT1,RP11-385D13.1,TRIM16,ZNF286A,ZNF286A,TBC1D26,ADORA2B,ZSWIM7,TTC19,NCOR1,AC002553.1,PIGL,CENPV,UBB,TRPV2,FAM211A	21001female:23105male:17:17
21001	23105	Body mass index (BMI)	Basal metabolic rate	17	56	0.000182236	0.00631053	8.46241e-05	0.342655	1	0.60196	1	0.000120213	0.0401483	ENSG00000172809.8,ENSG00000141540.6,ENSG00000171595.9,ENSG00000196169.10,ENSG00000268626.1,ENSG00000204347.3,ENSG00000257008.2	RPL38,TTYH2,DNAI2,KIF19,AC103809.2,BTBD17,GPR142	21001female:23105male:17:56
21001	23105	Body mass index (BMI)	Basal metabolic rate	17	61	3.49464e-05	0.387423	0.000283577	0.00220803	1	0.107911	1	7.64573e-05	0.0387502	ENSG00000108669.12,ENSG00000055483.15,ENSG00000035862.8,ENSG00000178404.5,ENSG00000108679.8,ENSG00000171302.12,ENSG00000265096.1,ENSG00000173918.10,ENSG00000167280.12	CYTH1,USP36,TIMP2,DDC8,LGALS3BP,CANT1,C1QTNF1-AS1,C1QTNF1,ENGASE	21001female:23105male:17:61
21001	23105	Body mass index (BMI)	Basal metabolic rate	18	49	0.00138789	3.31203e-07	0.00163776	6.97303e-07	0.982798	0.880588	1	5.03779e-09	0.000570328	ENSG00000166603.3	MC4R	21001female:23105male:18:49
21001	23105	Body mass index (BMI)	Basal metabolic rate	18	63	0.000307042	0.00880068	0.00010596	0.243941	1	0.642964	1	9.85128e-05	0.0388849	ENSG00000180011.6,ENSG00000179981.9,ENSG00000264116.1,ENSG00000206026.3	ZADH2,TSHZ1,RP11-321M21.3,SMIM21	21001female:23105male:18:63
21001	23105	Body mass index (BMI)	Basal metabolic rate	19	31	0.00019915	0.011704	0.000178075	0	1	0.754175	1	7.4072e-06	0.0295748	ENSG00000169021.4,ENSG00000187135.7,ENSG00000105171.5,ENSG00000166289.5,ENSG00000131943.13,ENSG00000105173.9	UQCRFS1,VSTM2B,POP4,PLEKHF1,C19orf12,CCNE1	21001female:23105male:19:31
21001	23105	Body mass index (BMI)	Basal metabolic rate	19	48	0.000503561	0	0.000524345	0.00194558	0.860786	0.511751	1	8.45464e-05	0.0387952	ENSG00000124440.11,ENSG00000011485.10,ENSG00000169515.5,ENSG00000182013.13,ENSG00000230510.2,ENSG00000204851.5,ENSG00000204850.3,ENSG00000268423.1,ENSG00000160014.12,ENSG00000160013.4,ENSG00000167414.4,ENSG00000197380.6,ENSG00000105287.8,ENSG00000090372.10,ENSG00000181027.6,ENSG00000105281.8,ENSG00000042753.7,ENSG00000160007.13,ENSG00000130751.5,ENSG00000130748.6,ENSG00000130749.5,ENSG00000142230…	HIF3A,PPP5C,CCDC8,PNMAL1,PPP5D1,PNMAL2,AC011484.1,AC011551.3,CALM3,PTGIR,GNG8,DACT3,PRKD2,STRN4,FKRP,SLC1A5,AP2S1,ARHGAP35,NPAS1,TMEM160,ZC3H4,SAE1,BBC3	21001female:23105male:19:48
21001	23105	Body mass index (BMI)	Basal metabolic rate	20	14	9.84176e-05	0.203299	0.000163535	0.0880386	1	0.681168	1	4.21129e-05	0.0363739	ENSG00000172296.8	SPTLC3	21001female:23105male:20:14
21001	23105	Body mass index (BMI)	Basal metabolic rate	22	22	0.000181588	0.10579	0.000263297	0.0209453	1	0.632763	1	0.000264535	0.0459382	ENSG00000168135.4,ENSG00000100196.6,ENSG00000100201.14,ENSG00000100206.5,ENSG00000184949.11,ENSG00000100211.6,ENSG00000100216.4,ENSG00000100221.6,ENSG00000100226.11,ENSG00000100242.11,ENSG00000100246.8,ENSG00000221890.2,ENSG00000183741.7,ENSG00000128383.8,ENSG00000179750.11,ENSG00000244509.3,ENSG00000243811.3,ENSG00000128394.12,ENSG00000239713.3,ENSG00000100298.11,ENSG00000100307.8,ENSG0000010031…	KCNJ4,KDELR3,DDX17,DMC1,FAM227A,CBY1,TOMM22,JOSD1,GTPBP1,SUN2,DNAL4,NPTXR,CBX6,APOBEC3A,APOBEC3B,APOBEC3C,APOBEC3D,APOBEC3F,APOBEC3G,APOBEC3H,CBX7,PDGFB,AL031590.1,RPL3,SYNGR1,TAB1,MGAT3,MIEF1,ATF4,RPS19BP1,CACNA1I,ENTHD1	21001female:23105male:22:22
21001	3526	Body mass index (BMI)	Mother's age at death	3	161	8.32321e-05	0.179503	0.000143598	0.151349	-1	-1	-0.0217022	9.38234e-05	0.0388849	ENSG00000172578.7,ENSG00000114796.11,ENSG00000163872.11,ENSG00000180834.3,ENSG00000175193.8,ENSG00000114770.12,ENSG00000186090.6,ENSG00000178084.1,ENSG00000186038.5,ENSG00000145191.7,ENSG00000161202.13,ENSG00000161203.9,ENSG00000161204.7,ENSG00000145198.10,ENSG00000214160.5,ENSG00000145194.13,ENSG00000163888.3,ENSG00000175166.12,ENSG00000114867.15,ENSG00000175182.9,ENSG00000114859.10,ENSG00000163…	KLHL6,KLHL24,YEATS2,MAP6D1,PARL,ABCC5,HTR3D,HTR3C,HTR3E,EIF2B5,DVL3,AP2M1,ABCF3,VWA5B2,ALG3,ECE2,CAMK2N2,PSMD2,EIF4G1,FAM131A,CLCN2,POLR2H,THPO,CHRD,RP11-433C9.2,EPHB3,MAGEF1	21001female:3526male:3:161
21001	50	Body mass index (BMI)	Standing height	1	41	6.48421e-05	0.0503027	0.000120318	0.00269839	-1	-1	-0.20292	2.2053e-05	0.0340966	ENSG00000142945.8,ENSG00000142937.7,ENSG00000142959.4,ENSG00000173846.8,ENSG00000188396.2,ENSG00000222009.4,ENSG00000117425.9,ENSG00000070785.12,ENSG00000126107.10,ENSG00000126088.8,ENSG00000162415.6,ENSG00000186603.4,ENSG00000132781.13,ENSG00000132773.7,ENSG00000070759.12,ENSG00000236624.4,ENSG00000132763.10,ENSG00000117450.9,ENSG00000117448.9,ENSG00000132780.12,ENSG00000159588.10,ENSG0000015959…	KIF2C,RPS8,BEST4,PLK3,TCTEX1D4,BTBD19,PTCH2,EIF2B3,HECTD3,UROD,ZSWIM5,HPDL,MUTYH,TOE1,TESK2,CCDC163P,MMACHC,PRDX1,AKR1A1,NASP,CCDC17,GPBP1L1,TMEM69,IPP,MAST2,PIK3R3,TSPAN1,POMGNT1,LURAP1,RAD54L,LRRC41,UQCRH,NSUN4,FAAH,DMBX1,KNCN,MKNK1,MOB3C,ATPAF1,EFCAB14,TEX38	21001female:50male:1:41
21001	50	Body mass index (BMI)	Standing height	2	35	3.6772e-05	0.417112	0.00132845	5.71229e-07	-1	-1	-0.386939	3.32235e-05	0.035163	ENSG00000049323.11	LTBP1	21001female:50male:2:35
21001	50	Body mass index (BMI)	Standing height	2	185	0.000195787	0.0206104	4.95562e-05	0.416343	1	0.520952	1	3.07814e-06	0.0246952	ENSG00000144410.4,ENSG00000118263.10,ENSG00000118260.10,ENSG00000144401.10,ENSG00000163249.5,ENSG00000163251.3	CPO,KLF7,CREB1,METTL21A,CCNYL1,FZD5	21001female:50male:2:185
21001	50	Body mass index (BMI)	Standing height	9	61	8.01672e-05	0.268099	0.00036426	0.000249905	-1	-1	-0.622962	3.96257e-05	0.0362489	ENSG00000165105.9,ENSG00000172159.11,ENSG00000148057.11,ENSG00000135018.9,ENSG00000165113.8,ENSG00000165115.10,ENSG00000165118.10,ENSG00000165119.14,ENSG00000178966.11	RASEF,FRMD3,IDNK,UBQLN1,GKAP1,KIF27,C9orf64,HNRNPK,RMI1	21001female:50male:9:61
21001	50	Body mass index (BMI)	Standing height	11	75	0.000116654	0.0498259	3.972e-05	0.345255	-1	-1	-0.154515	1.69005e-05	0.0329248	ENSG00000151364.11,ENSG00000259112.1,ENSG00000151365.2,ENSG00000151366.8,ENSG00000159063.8,ENSG00000188997.3,ENSG00000118369.8,ENSG00000033327.8,ENSG00000137513.5	KCTD14,NDUFC2-KCTD14,THRSP,NDUFC2,ALG8,KCTD21,USP35,GAB2,NARS2	21001female:50male:11:75
21001	50	Body mass index (BMI)	Standing height	16	57	7.61921e-05	0.390847	0.000400511	0.00473887	-1	-1	-0.528553	6.12837e-06	0.0278471			21001female:50male:16:57
21001	50	Body mass index (BMI)	Standing height	17	46	0.000255584	0.047928	0.00274781	3.10956e-08	-0.791579	-0.9978	-0.439744	0.000150255	0.041265	ENSG00000121068.9,ENSG00000187013.2,ENSG00000121075.5,ENSG00000253506.1,ENSG00000136492.4,ENSG00000108506.7,ENSG00000108510.5,ENSG00000270033.1	TBX2,C17orf82,TBX4,NACA2,BRIP1,INTS2,MED13,RP11-51L5.7	21001female:50male:17:46
21001	50	Body mass index (BMI)	Standing height	19	22	0.000769045	0.00743927	0.000729278	0.000274231	-0.879188	-1	-0.554555	6.07182e-05	0.0378246	ENSG00000130511.11,ENSG00000105655.14,ENSG00000105656.8,ENSG00000105701.11,ENSG00000105700.6,ENSG00000221983.3,ENSG00000006016.6,ENSG00000006015.13,ENSG00000105696.4,ENSG00000167487.7,ENSG00000105662.11,ENSG00000105664.6,ENSG00000005007.8,ENSG00000130283.7,ENSG00000223802.3,ENSG00000105669.8,ENSG00000268193.1,ENSG00000105671.7,ENSG00000051128.14,ENSG00000064607.12,ENSG00000105676.9,ENSG0000018103…	SSBP4,ISYNA1,ELL,FKBP8,KXD1,UBA52,CRLF1,C19orf60,TMEM59L,KLHL26,CRTC1,COMP,UPF1,GDF1,CERS1,COPE,AC002985.3,DDX49,HOMER3,SUGP2,ARMC6,SLC25A42,TMEM161A,MEF2BNB-MEF2B,MEF2B,MEF2BNB,RFXANK,NR2C2AP,NCAN,HAPLN4,TM6SF2,SUGP1,MAU2,GATAD2A,TSSK6,NDUFA13,CTC-260F20.3,YJEFN3,CILP2,PBX4,LPAR2	21001female:50male:19:22
21001	924	Body mass index (BMI)	Usual walking pace	2	208	0.000155257	0.0459325	0.000102821	0.0889189	-1	-1	-0.645965	0.000161456	0.0417794	ENSG00000173699.11,ENSG00000204128.5,ENSG00000173692.8,ENSG00000135914.5,ENSG00000135931.13,ENSG00000156966.6,ENSG00000233538.1,ENSG00000115053.11,ENSG00000171596.6,ENSG00000177673.2,ENSG00000269363.1,ENSG00000187514.10,ENSG00000156973.9,ENSG00000144524.13,ENSG00000163273.3,ENSG00000144535.15,ENSG00000163283.6,ENSG00000163286.3,ENSG00000163295.4	SPATA3,C2orf72,PSMD1,HTR2B,ARMC9,B3GNT7,AC017104.2,NCL,NMUR1,C2orf57,MGC4771,PTMA,PDE6D,COPS7B,NPPC,DIS3L2,ALPP,ALPPL2,ALPI	21001female:924male:2:208
21001	924	Body mass index (BMI)	Usual walking pace	14	10	0.000264439	0.0691709	0.000519261	3.75703e-05	-1	-1	-0.642364	7.68496e-05	0.038766	ENSG00000176165.7,ENSG00000186960.6,ENSG00000184304.10	FOXG1,C14orf23,PRKD1	21001female:924male:14:10
21001	924	Body mass index (BMI)	Usual walking pace	15	13	1.87177e-05	0.732082	5.8072e-05	0	-1	-1	-0.0173017	0.000330913	0.0489729	ENSG00000021776.6,ENSG00000198146.4,ENSG00000212768.2,ENSG00000134146.7	AQR,ZNF770,AC114546.1,DPH6	21001female:924male:15:13
21001	924	Body mass index (BMI)	Usual walking pace	15	31	0.000262912	0.00494956	0.000191204	0.0170584	-1	-1	-0.60436	0.000343629	0.0494601	ENSG00000137845.10,ENSG00000128923.6,ENSG00000157450.11,ENSG00000137776.12,ENSG00000157456.3,ENSG00000157483.4,ENSG00000268327.1,ENSG00000171989.4,ENSG00000157470.7	ADAM10,FAM63B,RNF111,SLTM,CCNB2,MYO1E,C15ORF31,LDHAL6B,FAM81A	21001female:924male:15:31
21001	924	Body mass index (BMI)	Usual walking pace	16	23	0.000337966	0.00198424	0.000192557	0.0158154	-1	-1	-0.59696	9.41438e-07	0.0174876	ENSG00000006116.3,ENSG00000122257.14,ENSG00000090905.13,ENSG00000158865.8,ENSG00000140750.12,ENSG00000205629.7	CACNG3,RBBP6,TNRC6A,SLC5A11,ARHGAP17,LCMT1	21001female:924male:16:23
21001	924	Body mass index (BMI)	Usual walking pace	17	6	0.000170053	0.000570602	6.76929e-05	0.145258	-1	-1	-0.337934	6.57422e-05	0.0381041	ENSG00000188176.7,ENSG00000161905.8,ENSG00000141456.10,ENSG00000141480.13,ENSG00000161920.5,ENSG00000161921.10,ENSG00000141497.9,ENSG00000142484.5,ENSG00000182853.7,ENSG00000182327.7,ENSG00000142507.5,ENSG00000129219.9,ENSG00000141503.11,ENSG00000108556.7,ENSG00000205710.3,ENSG00000185245.6,ENSG00000108528.9,ENSG00000108523.11,ENSG00000108518.7,ENSG00000108515.13,ENSG00000091640.3,ENSG00000108509…	SMTNL2,ALOX15,PELP1,ARRB2,MED11,CXCL16,ZMYND15,TM4SF5,VMO1,GLTPD2,PSMB6,PLD2,MINK1,CHRNE,C17orf107,GP1BA,SLC25A11,RNF167,PFN1,ENO3,SPAG7,CAMTA2,INCA1,KIF1C,SLC52A1,ZFP3,ZNF232,USP6,ZNF594,SCIMP,RABEP1,NUP88,RPAIN,C1QBP,DHX33,DERL2,MIS12,NLRP1	21001female:924male:17:6
21001	924	Body mass index (BMI)	Usual walking pace	17	47	0.000142295	0.00954457	1.96803e-05	0.533469	-1	-1	-0.318732	3.42986e-06	0.0251331	ENSG00000087995.11,ENSG00000146872.13,ENSG00000011028.9,ENSG00000173838.7,ENSG00000170921.10,ENSG00000008283.11,ENSG00000159640.10,ENSG00000264813.1,ENSG00000173826.10,ENSG00000136485.10,ENSG00000136463.7,ENSG00000198909.3,ENSG00000136490.4,ENSG00000266173.1,ENSG00000125695.12,ENSG00000108588.9,ENSG00000198231.8,ENSG00000108592.12,ENSG00000087191.8,ENSG00000108604.11,ENSG00000213218.5,ENSG0000013…	METTL2A,TLK2,MRC2,MARCH10,TANC2,CYB561,ACE,ACE,KCNH6,DCAF7,TACO1,MAP3K3,LIMD2,STRADA,RP11-51F16.8,CCDC47,DDX42,FTSJ3,PSMC5,SMARCD2,CSH2,GH2,CSH1,CSHL1,GH1,CD79B,SCN4A,C17orf72,ICAM2	21001female:924male:17:47
21001	924	Body mass index (BMI)	Usual walking pace	18	31	0.000133957	0.0475636	5.45027e-05	0.0790659	-1	-1	-0.427143	0.000152384	0.041348			21001female:924male:18:31
21001	924	Body mass index (BMI)	Usual walking pace	22	27	6.67802e-05	0.54833	8.99631e-05	0.490379	-1	-1	-0.349935	0.000335593	0.0492623	ENSG00000138964.12,ENSG00000138944.7,ENSG00000220702.1,ENSG00000188636.3,ENSG00000186654.16	PARVG,KIAA1644,RP1-32I10.10,LDOC1L,PRR5	21001female:924male:22:27
21001	I9_CHD	Body mass index (BMI)	Major coronary heart disease event	2	178	0.00012975	0.0454605	8.08294e-05	0	1	0.560756	1	0.000323728	0.0486709	ENSG00000115524.11,ENSG00000115520.4,ENSG00000144381.12,ENSG00000115541.6,ENSG00000270757.1,ENSG00000115540.10,ENSG00000162944.6,ENSG00000222017.1,ENSG00000247626.3,ENSG00000152430.13,ENSG00000115896.11	SF3B1,COQ10B,HSPD1,HSPE1,HSPE1-MOB4,MOB4,RFTN2,AC011997.1,MARS2,BOLL,PLCL1	21001female:I9_CHDmale:2:178
21001	I9_CHD	Body mass index (BMI)	Major coronary heart disease event	3	44	0.000783373	0.000772012	5.05432e-05	0.401906	1	0.563556	1	0.000248383	0.0452971	ENSG00000114646.5,ENSG00000173473.6,ENSG00000132153.10,ENSG00000047849.17,ENSG00000164045.7,ENSG00000164047.3,ENSG00000164048.9,ENSG00000172113.4,ENSG00000229453.1,ENSG00000164049.10,ENSG00000164050.8,ENSG00000164051.9,ENSG00000232112.3,ENSG00000164053.13,ENSG00000213689.5,ENSG00000164054.11,ENSG00000114268.7,ENSG00000145040.3,ENSG00000114270.11,ENSG00000010256.6,ENSG00000183396.3,ENSG00000225697…	CSPG5,SMARCC1,DHX30,MAP4,CDC25A,CAMP,ZNF589,NME6,SPINK8,FBXW12,PLXNB1,CCDC51,TMA7,ATRIP,TREX1,SHISA5,PFKFB4,UCN2,COL7A1,UQCRC1,TMEM89,SLC26A6,CELSR3,NCKIPSD,IP6K2,PRKAR2A,SLC25A20,ARIH2OS,ARIH2,P4HTM,WDR6,DALRD3,NDUFAF3,IMPDH2,QRICH1,QARS,USP19,LAMB2,CCDC71,KLHDC8B,C3orf84,CCDC36,RP11-3B7.1,C3orf62,USP4,GPX1,RHOA,TCTA,AMT,NICN1,DAG1,BSN,APEH,MST1,RNF123,AMIGO3,GMPPB,IP6K1,CDHR4,FAM212A,UBA7,TRAIP…	21001female:I9_CHDmale:3:44
21001	I9_CHD	Body mass index (BMI)	Major coronary heart disease event	5	35	3.27745e-05	0.652061	3.73628e-05	0.644328	-1	-1	-0.0261026	0.000252646	0.0453986	ENSG00000164318.13,ENSG00000113594.5,ENSG00000145623.8,ENSG00000164327.8,ENSG00000082074.11,ENSG00000269215.1,ENSG00000113600.6	EGFLAM,LIFR,OSMR,RICTOR,FYB,AC008964.1,C9	21001female:I9_CHDmale:5:35
21001	I9_CHD	Body mass index (BMI)	Major coronary heart disease event	9	104	0.000112821	0.0321361	3.49793e-05	0.215049	1	0.30293	1	9.31304e-06	0.0315158	ENSG00000177125.5,ENSG00000136828.14,ENSG00000136859.5,ENSG00000136895.14,ENSG00000136856.13,ENSG00000196152.6,ENSG00000197958.8,ENSG00000148356.9,ENSG00000136830.7,ENSG00000136854.13,ENSG00000187024.9,ENSG00000160401.10,ENSG00000167094.11,ENSG00000160404.13,ENSG00000095370.15,ENSG00000136807.7,ENSG00000136877.10,ENSG00000106991.9,ENSG00000106992.13,ENSG00000160408.10,ENSG00000136840.14,ENSG00000…	ZBTB34,RALGPS1,ANGPTL2,GARNL3,SLC2A8,ZNF79,RPL12,LRSAM1,FAM129B,STXBP1,PTRH1,C9orf117,TTC16,TOR2A,SH2D3C,CDK9,FPGS,ENG,AK1,ST6GALNAC6,ST6GALNAC4,PIP5KL1,DPM2,FAM102A,NAIF1,SLC25A25,PTGES2	21001female:I9_CHDmale:9:104
21001	I9_CHD	Body mass index (BMI)	Major coronary heart disease event	11	10	6.1245e-05	0.384885	0.000105908	0	1	0.213121	1	5.02257e-05	0.037033	ENSG00000170743.12,ENSG00000183801.3,ENSG00000166387.7,ENSG00000166394.10,ENSG00000183303.2,ENSG00000182334.1	SYT9,OLFML1,PPFIBP2,CYB5R2,OR5P2,OR5P3	21001female:I9_CHDmale:11:10
21001	20002_1223	Body mass index (BMI)	Type 2 diabetes	9	69	2.61115e-05	0.614874	9.71846e-05	0.041129	-1	-1	-0.193519	1.79693e-05	0.0331133	ENSG00000165025.10,ENSG00000148090.7	SYK,AUH	21001female:20002_1223male:9:69
21001	20002_1286	Body mass index (BMI)	Depression	10	25	0.000226777	0.00418703	4.04346e-05	0.367324	1	0.247725	1	2.93181e-05	0.035163	ENSG00000078114.14,ENSG00000204683.6	NEBL,C10orf113	21001female:20002_1286male:10:25
21001	20002_1286	Body mass index (BMI)	Depression	10	73	0.000517477	0.0226951	9.33616e-05	0.105619	1	0.711771	1	0.000111282	0.0394605	ENSG00000165655.14,ENSG00000148655.10	ZNF503,C10orf11	21001female:20002_1286male:10:73
2139	2149	Age first had sexual intercourse	Lifetime number of sexual partners	1	50	0.00021549	0.0436114	0.000292705	0.0203319	-1	-1	-0.609161	0.000319039	0.0484407			2139female:2149male:1:50
2139	2149	Age first had sexual intercourse	Lifetime number of sexual partners	1	79	0.00016924	0.147493	0.000186012	0	-1	-1	-0.687169	8.76144e-06	0.0307116	ENSG00000143032.7,ENSG00000122482.16	BARHL2,ZNF644	2139female:2149male:1:79
2139	2149	Age first had sexual intercourse	Lifetime number of sexual partners	2	26	0.000163168	0.0716103	0.000265806	0.0126207	-1	-1	-0.569557	3.23507e-05	0.035163			2139female:2149male:2:26
2139	2149	Age first had sexual intercourse	Lifetime number of sexual partners	2	97	5.00649e-05	0.348942	8.5109e-05	0.2282	-1	-1	-0.129913	0.000216374	0.0440092	ENSG00000170500.8,ENSG00000269383.1,ENSG00000115526.6,ENSG00000204640.1,ENSG00000115539.9	LONRF2,AC012493.2,CHST10,NMS,PDCL3	2139female:2149male:2:97
2139	2149	Age first had sexual intercourse	Lifetime number of sexual partners	2	130	0.000183525	0.0100148	0.000158276	0.0326609	-1	-1	-0.410141	3.32663e-05	0.035163			2139female:2149male:2:130
2139	2149	Age first had sexual intercourse	Lifetime number of sexual partners	2	165	9.20204e-05	0.087062	0.000209156	0.0426801	-1	-1	-0.206521	0.000133343	0.0405803	ENSG00000170035.11	UBE2E3	2139female:2149male:2:165
2139	2149	Age first had sexual intercourse	Lifetime number of sexual partners	6	127	0.000162821	0.028308	0.000151351	0.0627675	-1	-1	-0.060106	0.000241031	0.0451112			2139female:2149male:6:127
2139	2149	Age first had sexual intercourse	Lifetime number of sexual partners	10	117	7.71789e-05	0.401639	0.000163539	0.126301	-1	-1	-0.0741074	7.72792e-05	0.0387669	ENSG00000154493.13,ENSG00000188916.4	C10orf90,FAM196A	2139female:2149male:10:117
2139	2149	Age first had sexual intercourse	Lifetime number of sexual partners	16	37	0.000102773	0.101039	1.729e-05	0.80163	-1	-1	-0.109311	0.000283113	0.0467071	ENSG00000172775.12,ENSG00000159579.9,ENSG00000102931.3,ENSG00000102934.5,ENSG00000102962.4,ENSG00000006210.6,ENSG00000102970.6,ENSG00000005194.10,ENSG00000088682.9,ENSG00000102978.8,ENSG00000125170.6,ENSG00000135736.5,ENSG00000159618.11,ENSG00000205336.7,ENSG00000182885.12,ENSG00000159625.10,ENSG00000140854.8,ENSG00000140859.11,ENSG00000187185.3,ENSG00000070729.9,ENSG00000159648.7,ENSG00000166188…	FAM192A,RSPRY1,ARL2BP,PLLP,CCL22,CX3CL1,CCL17,CIAPIN1,COQ9,POLR2C,DOK4,CCDC102A,GPR114,GPR56,GPR97,CCDC135,KATNB1,KIFC3,CTD-2600O9.1,CNGB1,TEPP,ZNF319,USB1,MMP15,C16orf80,CSNK2A2,CCDC113,PRSS54,GINS3	2139female:2149male:16:37
2139	2207	Age first had sexual intercourse	Wears glasses or contact lenses	12	32	5.30631e-05	0.0281147	3.73118e-05	0	1	0.261926	1	1.30229e-05	0.0328404	ENSG00000133704.5,ENSG00000110888.13	IPO8,CAPRIN2	2139female:2207male:12:32
2139	22501	Age first had sexual intercourse	Year ended full time education	5	90	0.000280514	0.0188005	0.000978685	0.00678544	1	0.688369	1	8.31979e-05	0.0387825	ENSG00000184349.8	EFNA5	2139female:22501male:5:90
2139	22501	Age first had sexual intercourse	Year ended full time education	6	14	0.000352159	0.000219392	0.000535378	0.18044	1	0.589559	1	0.000337747	0.0493097	ENSG00000230873.4,ENSG00000112183.10	STMND1,RBM24	2139female:22501male:6:14
2139	22501	Age first had sexual intercourse	Year ended full time education	6	99	7.22599e-05	0.0790616	7.25627e-05	0.629552	1	0.0355036	1	2.42513e-05	0.0344835	ENSG00000203797.5,ENSG00000004809.9,ENSG00000155111.10,ENSG00000123505.10,ENSG00000155115.6,ENSG00000197498.8	DDO,SLC22A16,CDK19,AMD1,GTF3C6,RPF2	2139female:22501male:6:99
2139	22501	Age first had sexual intercourse	Year ended full time education	16	1	0.000246112	0.000587989	0.000318722	0.178122	1	0.672167	1	2.59838e-05	0.0347075	ENSG00000161980.5,ENSG00000161981.6,ENSG00000007384.11,ENSG00000103152.7,ENSG00000103148.11,ENSG00000130656.4,ENSG00000206177.2,ENSG00000188536.8,ENSG00000206172.4,ENSG00000086506.2,ENSG00000007392.12,ENSG00000167930.11,ENSG00000269881.1,ENSG00000076344.11,ENSG00000242173.4,ENSG00000185615.11,ENSG00000103126.10,ENSG00000086504.11,ENSG00000129925.6,ENSG00000103202.8,ENSG00000242612.2,ENSG000000905…	POLR3K,SNRNP25,RHBDF1,MPG,NPRL3,HBZ,HBM,HBA2,HBA1,HBQ1,LUC7L,ITFG3,ITFG3,RGS11,ARHGDIG,PDIA2,AXIN1,MRPL28,TMEM8A,NME4,DECR2,RAB11FIP3,CAPN15,C16orf11,PIGQ,NHLRC4,RAB40C,WFIKKN1,C16orf13,FAM195A,WDR90,RHOT2,RHBDL1,STUB1,JMJD8,WDR24,FBXL16,METRN,FAM173A,CCDC78,HAGHL,NARFL,MSLN,MSLNL,RPUSD1,CHTF18,GNG13,PRR25,LMF1,AC009041.2,SOX8	2139female:22501male:16:1
2139	22501	Age first had sexual intercourse	Year ended full time education	18	2	7.32073e-05	0.436237	0.000178108	0.225144	1	0.287729	1	1.1137e-05	0.0327302	ENSG00000141433.8	ADCYAP1	2139female:22501male:18:2
2139	22501	Age first had sexual intercourse	Year ended full time education	20	39	7.53724e-05	0.176856	0.000215948	0.206739	1	0.149715	1	0.000117009	0.0397901	ENSG00000168746.6,ENSG00000124120.6,ENSG00000132824.9,ENSG00000168734.9,ENSG00000269605.1,ENSG00000196839.8,ENSG00000064205.6,ENSG00000124249.5,ENSG00000101098.8,ENSG00000166913.8,ENSG00000101104.8,ENSG00000025772.7,ENSG00000101109.7,ENSG00000124134.4,ENSG00000175121.7,ENSG00000168703.5,ENSG00000124102.4,ENSG00000124233.10,ENSG00000124157.6,ENSG00000124107.5,ENSG00000124159.11,ENSG00000124232.6,E…	C20orf62,TTPAL,SERINC3,PKIG,Z97053.1,ADA,WISP2,KCNK15,RIMS4,YWHAB,PABPC1L,TOMM34,STK4,KCNS1,WFDC5,WFDC12,PI3,SEMG1,SEMG2,SLPI,MATN4,RBPJL,SDC4,SYS1,SYS1-DBNDD2,TP53TG5,DBNDD2,PIGT	2139female:22501male:20:39
2139	23105	Age first had sexual intercourse	Basal metabolic rate	1	72	0.000100444	0.0269901	3.52011e-05	0.369396	-1	-1	-0.0171017	0.000139061	0.0408793	ENSG00000137941.12,ENSG00000142875.15	TTLL7,PRKACB	2139female:23105male:1:72
2139	23105	Age first had sexual intercourse	Basal metabolic rate	2	104	5.83896e-05	0.305531	8.63811e-05	0.308831	-1	-1	-0.348135	0.000224696	0.0444725	ENSG00000196862.8,ENSG00000115665.4,ENSG00000196228.2,ENSG00000198203.5,ENSG00000198075.5,ENSG00000135968.15,ENSG00000169756.12,ENSG00000153201.11,ENSG00000163006.7,ENSG00000135960.5	RGPD4,SLC5A7,SULT1C3,SULT1C2,SULT1C4,GCC2,LIMS1,RANBP2,CCDC138,EDAR	2139female:23105male:2:104
2139	23105	Age first had sexual intercourse	Basal metabolic rate	2	209	7.53663e-05	0.0544425	0.00019435	0.0118645	1	0.218922	1	4.2463e-05	0.0363739	ENSG00000237412.2,ENSG00000135902.5,ENSG00000196811.7,ENSG00000221944.3,ENSG00000135930.9,ENSG00000115468.7,ENSG00000204120.10,ENSG00000115474.6,ENSG00000182600.5,ENSG00000066248.10,ENSG00000222001.2,ENSG00000115488.3	PRSS56,CHRND,CHRNG,TIGD1,EIF4E2,EFHD1,GIGYF2,KCNJ13,C2orf82,NGEF,AC106876.2,NEU2	2139female:23105male:2:209
2139	23105	Age first had sexual intercourse	Basal metabolic rate	4	159	5.92502e-05	0.0888236	4.32059e-05	0.0674293	-1	-1	-0.621962	0.000352921	0.0498077			2139female:23105male:4:159
2139	3526	Age first had sexual intercourse	Mother's age at death	2	159	0.00023516	0	4.43915e-05	0.68289	1	0.491749	1	0.00032024	0.0484787	ENSG00000144354.9,ENSG00000172845.9	CDCA7,SP3	2139female:3526male:2:159
2139	3526	Age first had sexual intercourse	Mother's age at death	8	16	0.000276455	4.6222e-05	6.26709e-05	0.100548	1	0.140114	1	7.47582e-05	0.0387441	ENSG00000147324.6,ENSG00000104626.10,ENSG00000173281.4,ENSG00000253426.1	MFHAS1,ERI1,PPP1R3B,RP11-10A14.4	2139female:3526male:8:16
2139	50	Age first had sexual intercourse	Standing height	2	49	0.00055909	1.96803e-05	0.000633174	0.000174407	0.993399	0.70257	1	5.47913e-05	0.0374924	ENSG00000138095.14,ENSG00000138032.16,ENSG00000138079.9,ENSG00000138078.11,ENSG00000143919.10,ENSG00000138083.3	LRPPRC,PPM1B,SLC3A1,PREPL,CAMKMT,SIX3	2139female:50male:2:49
2139	50	Age first had sexual intercourse	Standing height	2	192	7.87008e-05	0.262556	7.79263e-05	0.199359	1	0.458946	1	0.0003496	0.0496302	ENSG00000174453.5,ENSG00000138376.6	VWC2L,BARD1	2139female:50male:2:192
2139	50	Age first had sexual intercourse	Standing height	5	131	8.26505e-05	0.0382248	5.7378e-05	0.0908323	1	0.278328	1	5.82629e-05	0.0375707			2139female:50male:5:131
2139	50	Age first had sexual intercourse	Standing height	6	5	7.82588e-05	0.0807486	0.000133845	0.171813	-1	-1	-0.316532	0.000125733	0.0402744	ENSG00000153046.13,ENSG00000124787.9,ENSG00000219607.2,ENSG00000214113.6	CDYL,RPP40,PPP1R3G,LYRM4	2139female:50male:6:5
2139	50	Age first had sexual intercourse	Standing height	7	92	0.000175877	0.166286	2.72001e-05	0.69115	1	0.0907091	1	0.000185002	0.0426644	ENSG00000106236.3,ENSG00000166448.10,ENSG00000196367.8,ENSG00000198742.5,ENSG00000185467.7,ENSG00000241685.4,ENSG00000130429.8,ENSG00000106244.8,ENSG00000106245.5,ENSG00000106246.13,ENSG00000248919.3,ENSG00000160917.10,ENSG00000214314.1,ENSG00000241468.3,ENSG00000198556.9,ENSG00000160908.14,ENSG00000196652.7,ENSG00000221909.2,ENSG00000197343.6,ENSG00000272647.1,ENSG00000197037.6,ENSG00000106258.9…	NPTX2,TMEM130,TRRAP,SMURF1,KPNA7,ARPC1A,ARPC1B,PDAP1,BUD31,PTCD1,ATP5J2-PTCD1,CPSF4,AC073063.1,ATP5J2,ZNF789,ZNF394,ZKSCAN5,FAM200A,ZNF655,GS1-259H13.10,ZSCAN25,CYP3A5,CYP3A7,CYP3A4	2139female:50male:7:92
2139	50	Age first had sexual intercourse	Standing height	10	91	0.000163517	0.0221343	0.000259153	0	1	0.80278	1	3.24038e-06	0.0251331	ENSG00000095637.16,ENSG00000059573.4,ENSG00000119977.16,ENSG00000138185.12,ENSG00000270099.1,ENSG00000173088.8,ENSG00000269948.1,ENSG00000269920.1,ENSG00000188649.7,ENSG00000107443.11	SORBS1,ALDH18A1,TCTN3,ENTPD1,RP11-248J23.7,C10orf131,RP11-248J23.6,RP11-690P14.4,CC2D2B,CCNJ	2139female:50male:10:91
2139	50	Age first had sexual intercourse	Standing height	11	74	7.66927e-05	0.135606	0.000236329	6.60583e-05	1	0.220922	1	2.85642e-05	0.035163	ENSG00000078124.7,ENSG00000198488.6,ENSG00000149260.10,ENSG00000254550.1,ENSG00000137474.15,ENSG00000178795.5,ENSG00000149269.5,ENSG00000268635.1,ENSG00000074201.4,ENSG00000178301.3,ENSG00000048649.9,ENSG00000087884.10,ENSG00000149262.12	ACER3,B3GNT6,CAPN5,OMP,MYO7A,GDPD4,PAK1,DKFZP434E1119,CLNS1A,AQP11,RSF1,AAMDC,INTS4	2139female:50male:11:74
2139	50	Age first had sexual intercourse	Standing height	17	34	0.00013887	0.172518	0.00122549	3.58248e-06	1	0.723772	1	1.89656e-05	0.0334323	ENSG00000108309.8,ENSG00000013306.11,ENSG00000030582.12,ENSG00000161682.10,ENSG00000005961.13,ENSG00000186566.7,ENSG00000180340.5,ENSG00000180336.13,ENSG00000180329.9,ENSG00000161692.13,ENSG00000073670.9,ENSG00000182963.5,ENSG00000131097.2,ENSG00000108883.8,ENSG00000167131.12,ENSG00000214447.3,ENSG00000131095.7,ENSG00000186185.9,ENSG00000131094.3,ENSG00000172992.7,ENSG00000136448.7,ENSG0000016171…	RUNDC3A,SLC25A39,GRN,FAM171A2,ITGA2B,GPATCH8,FZD2,C17orf104,CCDC43,DBF4B,ADAM11,GJC1,HIGD1B,EFTUD2,CCDC103,FAM187A,GFAP,KIF18B,C1QL1,DCAKD,NMT1,PLCD3,ACBD4,HEXIM1,HEXIM2,FMNL1,SPATA32	2139female:50male:17:34
2139	50	Age first had sexual intercourse	Standing height	21	27	0.000178695	0.0922744	0.000204048	0.17343	1	0.578958	1	0.000347806	0.049618	ENSG00000182240.11,ENSG00000183844.12,ENSG00000183486.8,ENSG00000157601.9,ENSG00000184012.7	BACE2,FAM3B,MX2,MX1,TMPRSS2	2139female:50male:21:27
2139	924	Age first had sexual intercourse	Usual walking pace	1	33	0.000301326	0.0105118	0.000215497	0.051246	1	0.575558	1	0.000347236	0.0495998	ENSG00000142698.10	C1orf94	2139female:924male:1:33
2139	924	Age first had sexual intercourse	Usual walking pace	3	44	0.000641114	0.00814537	0.00025316	0.0320795	0.9978	0.721772	1	0.000161103	0.0417794	ENSG00000114646.5,ENSG00000173473.6,ENSG00000132153.10,ENSG00000047849.17,ENSG00000164045.7,ENSG00000164047.3,ENSG00000164048.9,ENSG00000172113.4,ENSG00000229453.1,ENSG00000164049.10,ENSG00000164050.8,ENSG00000164051.9,ENSG00000232112.3,ENSG00000164053.13,ENSG00000213689.5,ENSG00000164054.11,ENSG00000114268.7,ENSG00000145040.3,ENSG00000114270.11,ENSG00000010256.6,ENSG00000183396.3,ENSG00000225697…	CSPG5,SMARCC1,DHX30,MAP4,CDC25A,CAMP,ZNF589,NME6,SPINK8,FBXW12,PLXNB1,CCDC51,TMA7,ATRIP,TREX1,SHISA5,PFKFB4,UCN2,COL7A1,UQCRC1,TMEM89,SLC26A6,CELSR3,NCKIPSD,IP6K2,PRKAR2A,SLC25A20,ARIH2OS,ARIH2,P4HTM,WDR6,DALRD3,NDUFAF3,IMPDH2,QRICH1,QARS,USP19,LAMB2,CCDC71,KLHDC8B,C3orf84,CCDC36,RP11-3B7.1,C3orf62,USP4,GPX1,RHOA,TCTA,AMT,NICN1,DAG1,BSN,APEH,MST1,RNF123,AMIGO3,GMPPB,IP6K1,CDHR4,FAM212A,UBA7,TRAIP…	2139female:924male:3:44
2139	924	Age first had sexual intercourse	Usual walking pace	3	153	0.000159608	0.0613071	0.000178173	0.038659	1	0.511351	1	0.000109682	0.0392869	ENSG00000267979.1,ENSG00000203443.2,ENSG00000121853.3,ENSG00000121858.6,ENSG00000144959.5,ENSG00000269496.1,ENSG00000114346.9,ENSG00000144962.6	AC092964.2,AC092964.1,GHSR,TNFSF10,NCEH1,AC007919.2,ECT2,SPATA16	2139female:924male:3:153
2139	924	Age first had sexual intercourse	Usual walking pace	11	128	0.000209364	0.0469228	0.000143928	0.182127	1	0.676568	1	2.77568e-06	0.0233728			2139female:924male:11:128
2139	924	Age first had sexual intercourse	Usual walking pace	12	78	0.00011543	0.0483786	7.62651e-05	0.0144795	1	0.391339	1	1.63766e-05	0.0328404			2139female:924male:12:78
2139	II_NEOPLASM	Age first had sexual intercourse	Neoplasms	8	17	0.000100033	0.00408757	2.8894e-05	0	-1	-1	-0.0945095	0.000140692	0.0409571	ENSG00000173273.11	TNKS	2139female:II_NEOPLASMmale:8:17
2139	II_NEOPLASM	Age first had sexual intercourse	Neoplasms	8	48	0.000172131	0.0608279	6.13304e-05	0.0906036	-1	-1	-0.593759	0.000222753	0.0443065	ENSG00000156687.6,ENSG00000233863.1	UNC5D,AC012215.1	2139female:II_NEOPLASMmale:8:48
2139	20002_1223	Age first had sexual intercourse	Type 2 diabetes	5	53	7.36387e-05	0.0234149	3.01078e-05	0.0259369	1	0.189719	1	0.000228024	0.0445374	ENSG00000035499.8,ENSG00000164181.9,ENSG00000049167.9,ENSG00000164182.6,ENSG00000269267.1,ENSG00000188725.3,ENSG00000130449.5	DEPDC1B,ELOVL7,ERCC8,NDUFAF2,AC008498.1,SMIM15,ZSWIM6	2139female:20002_1223male:5:53
2139	20002_1223	Age first had sexual intercourse	Type 2 diabetes	10	72	8.97907e-05	0.144301	3.47306e-05	0.440003	-1	-1	-0.111911	0.000162308	0.0417927	ENSG00000035403.12,ENSG00000185009.8,ENSG00000156110.9,ENSG00000156650.8,ENSG00000188716.5,ENSG00000079393.16,ENSG00000156671.8,ENSG00000165637.9,ENSG00000165644.6	VCL,AP3M1,ADK,KAT6B,DUPD1,DUSP13,SAMD8,VDAC2,COMTD1	2139female:20002_1223male:10:72
2139	20002_1223	Age first had sexual intercourse	Type 2 diabetes	15	55	0.000234485	0.0190492	6.88703e-05	0.254592	-1	-1	-0.512151	4.77705e-05	0.0369996	ENSG00000140538.12,ENSG00000259494.1,ENSG00000181991.11,ENSG00000140543.9,ENSG00000181026.13,ENSG00000172183.10	NTRK3,MRPL46,MRPS11,DET1,AEN,ISG20	2139female:20002_1223male:15:55
2139	20002_1291	Age first had sexual intercourse	Mania/Bipolar disorder	1	70	0.00016084	0.180365	5.23045e-05	0.392778	1	0.0211021	1	6.07235e-05	0.0378246			2139female:20002_1291male:1:70
2139	20002_1291	Age first had sexual intercourse	Mania/Bipolar disorder	1	154	1.69015e-05	0	0.000125148	0.146373	1	0.0573057	1	0.000245189	0.0452344	ENSG00000162702.7,ENSG00000118193.7,ENSG00000118197.9,ENSG00000118200.10,ENSG00000170128.2,ENSG00000163362.6,ENSG00000116852.10	ZNF281,KIF14,DDX59,CAMSAP2,GPR25,C1orf106,KIF21B	2139female:20002_1291male:1:154
2139	20002_1291	Age first had sexual intercourse	Mania/Bipolar disorder	3	12	0.000170551	0.0367187	4.01215e-05	0.502722	1	0.313131	1	1.95323e-05	0.0338102	ENSG00000163703.13,ENSG00000163704.7,ENSG00000125037.8,ENSG00000144554.6,ENSG00000163705.8,ENSG00000254999.2,ENSG00000134086.7,ENSG00000134070.4,ENSG00000157014.6,ENSG00000272410.1,ENSG00000157017.11,ENSG00000157020.13,ENSG00000157087.12,ENSG00000132164.5,ENSG00000157103.6	CRELD1,PRRT3,EMC3,FANCD2,FANCD2OS,BRK1,VHL,IRAK2,TATDN2,RP11-438J1.1,GHRL,SEC13,ATP2B2,SLC6A11,SLC6A1	2139female:20002_1291male:3:12
2149	23105	Lifetime number of sexual partners	Basal metabolic rate	2	31	9.12907e-05	0.0445292	7.80178e-05	0.064808	-1	-1	-0.283128	8.78907e-05	0.0387952	ENSG00000213639.5,ENSG00000163806.11,ENSG00000171103.6,ENSG00000163811.7,ENSG00000189350.8,ENSG00000179270.6,ENSG00000115295.15	PPP1CB,SPDYA,TRMT61B,WDR43,FAM179A,C2orf71,CLIP4	2149female:23105male:2:31
2149	23105	Lifetime number of sexual partners	Basal metabolic rate	4	99	0.000221465	0.00212677	0.000200578	0.0353235	1	0.20112	1	0.000184797	0.0426632	ENSG00000168772.9,ENSG00000168769.8,ENSG00000138777.15	CXXC4,TET2,PPA2	2149female:23105male:4:99
2149	23105	Lifetime number of sexual partners	Basal metabolic rate	6	16	0.000194651	0.0134853	3.21903e-05	0	1	0.226723	1	3.27174e-05	0.035163	ENSG00000124795.10,ENSG00000137393.8	DEK,RNF144B	2149female:23105male:6:16
2149	23105	Lifetime number of sexual partners	Basal metabolic rate	7	113	0.000195767	0.00354162	5.71416e-05	0.302228	-1	-1	-0.307131	1.94194e-06	0.0211376	ENSG00000048405.5,ENSG00000179562.2,ENSG00000004059.6,ENSG00000106328.8,ENSG00000106331.10,ENSG00000197157.6,ENSG00000128594.3,ENSG00000174697.4	ZNF800,GCC1,ARF5,FSCN3,PAX4,SND1,LRRC4,LEP	2149female:23105male:7:113
2149	23105	Lifetime number of sexual partners	Basal metabolic rate	8	24	4.84102e-05	0.0337748	5.5472e-05	0.0849272	-1	-1	-0.214921	8.58098e-05	0.0387952			2149female:23105male:8:24
2149	3526	Lifetime number of sexual partners	Mother's age at death	3	121	0.000108002	0.162195	0.000102635	0.108671	1	0.0835084	1	2.04078e-05	0.0338102	ENSG00000168875.1,ENSG00000066405.8,ENSG00000158163.10,ENSG00000118017.3,ENSG00000138231.8,ENSG00000114098.13,ENSG00000181322.9,ENSG00000158186.8,ENSG00000158220.9,ENSG00000114107.4,ENSG00000158234.8,ENSG00000051382.4,ENSG00000183770.5,ENSG00000206262.4	SOX14,CLDN18,DZIP1L,A4GNT,DBR1,ARMC8,NME9,MRAS,ESYT3,CEP70,FAIM,PIK3CB,FOXL2,C3orf72	2149female:3526male:3:121
2149	3526	Lifetime number of sexual partners	Mother's age at death	6	6	0.000108264	0.268929	8.86606e-05	0.59775	-1	-1	-0.338734	0.000151239	0.0413102	ENSG00000124785.4,ENSG00000124491.11	NRN1,F13A1	2149female:3526male:6:6
2149	50	Lifetime number of sexual partners	Standing height	2	49	5.47955e-05	0.490295	0.000633174	0.000174407	-1	-1	-0.511351	3.463e-05	0.0354527	ENSG00000138095.14,ENSG00000138032.16,ENSG00000138079.9,ENSG00000138078.11,ENSG00000143919.10,ENSG00000138083.3	LRPPRC,PPM1B,SLC3A1,PREPL,CAMKMT,SIX3	2149female:50male:2:49
2149	50	Lifetime number of sexual partners	Standing height	2	164	0.000135862	0.207378	0.000294441	0.00443054	1	0.629763	1	0.000250388	0.045377	ENSG00000163510.9	CWC22	2149female:50male:2:164
2149	50	Lifetime number of sexual partners	Standing height	3	81	3.74018e-05	0.256995	4.69858e-05	0.0488581	1	0.070307	1	7.56154e-05	0.0387502			2149female:50male:3:81
2149	50	Lifetime number of sexual partners	Standing height	4	123	0.000263255	0.00163581	1.79043e-05	0	-1	-1	-0.136114	1.93324e-05	0.0338102	ENSG00000077684.11,ENSG00000151466.7,ENSG00000151470.8	JADE1,SCLT1,C4orf33	2149female:50male:4:123
2149	50	Lifetime number of sexual partners	Standing height	12	25	4.49162e-05	0.601445	0.000699332	4.40502e-07	-1	-1	-0.516352	5.86069e-05	0.0375939	ENSG00000268865.1	AC026310.1	2149female:50male:12:25
2149	924	Lifetime number of sexual partners	Usual walking pace	9	101	5.23129e-05	0.386159	4.29399e-05	0.42073	1	0.156316	1	1.18059e-05	0.0328404	ENSG00000148204.7,ENSG00000119522.11,ENSG00000106689.6,ENSG00000119408.12,ENSG00000136930.8	CRB2,DENND1A,LHX2,NEK6,PSMB7	2149female:924male:9:101
2149	II_NEOPLASM	Lifetime number of sexual partners	Neoplasms	18	47	6.40809e-05	0.27924	0.000169396	0.161191	-1	-1	-0.320532	0.000149524	0.0412362	ENSG00000198796.6,ENSG00000172175.8,ENSG00000074657.9,ENSG00000166562.4	ALPK2,MALT1,ZNF532,SEC11C	2149female:II_NEOPLASMmale:18:47
2149	20002_1223	Lifetime number of sexual partners	Type 2 diabetes	5	43	5.55087e-05	0.355706	3.02666e-05	0.270418	1	0.145915	1	3.18302e-05	0.035163	ENSG00000016082.10	ISL1	2149female:20002_1223male:5:43
2149	20002_1291	Lifetime number of sexual partners	Mania/Bipolar disorder	9	102	6.00734e-05	0	2.00159e-05	0	-1	-1	-0.193319	5.1955e-05	0.0371522	ENSG00000180264.6,ENSG00000136931.5,ENSG00000148200.12,ENSG00000185585.15,ENSG00000136918.3,ENSG00000136942.10,ENSG00000136950.9,ENSG00000136935.9,ENSG00000173611.13,ENSG00000119414.7,ENSG00000136933.12,ENSG00000044574.7,ENSG00000165219.17,ENSG00000119487.12,ENSG00000167081.12	GPR144,NR5A1,NR6A1,OLFML2A,WDR38,RPL35,ARPC5L,GOLGA1,SCAI,PPP6C,RABEPK,HSPA5,GAPVD1,MAPKAP1,PBX3	2149female:20002_1291male:9:102
2207	22501	Wears glasses or contact lenses	Year ended full time education	12	93	9.58474e-05	0.0974511	9.22708e-05	0.667433	1	0.0287029	1	3.16367e-05	0.035163	ENSG00000166211.6,ENSG00000196091.8,ENSG00000111666.6,ENSG00000139351.10,ENSG00000111670.10,ENSG00000136048.9,ENSG00000120860.6,ENSG00000075188.4,ENSG00000185480.7,ENSG00000183395.4,ENSG00000017427.11	SPIC,MYBPC1,CHPT1,SYCP3,GNPTAB,DRAM1,CCDC53,NUP37,PARPBP,PMCH,IGF1	2207female:22501male:12:93
2207	23105	Wears glasses or contact lenses	Basal metabolic rate	12	20	0.000104689	0.114739	0.000108157	0.307932	1	0.589959	1	0.000158103	0.0416694	ENSG00000139154.10	AEBP2	2207female:23105male:12:20
2207	50	Wears glasses or contact lenses	Standing height	3	90	5.95894e-05	0.0572113	1.78943e-05	0.525544	-1	-1	-0.114711	3.64244e-05	0.0358228			2207female:50male:3:90
2207	924	Wears glasses or contact lenses	Usual walking pace	7	82	5.9158e-05	0.106752	2.214e-05	0.634613	-1	-1	-0.381738	0.000286415	0.0468818			2207female:924male:7:82
2207	924	Wears glasses or contact lenses	Usual walking pace	11	49	2.44176e-05	0.304961	0.00028946	0.00479726	-1	-1	-0.563556	6.17678e-06	0.0278471	ENSG00000149091.11,ENSG00000110492.11,ENSG00000180720.6,ENSG00000110497.10,ENSG00000180423.4,ENSG00000175224.12,ENSG00000175220.7,ENSG00000175213.2,ENSG00000180210.10,ENSG00000175216.10,ENSG00000134569.5,ENSG00000149179.9,ENSG00000149182.10,ENSG00000165912.11,ENSG00000134574.7,ENSG00000134575.5,ENSG00000025434.14,ENSG00000110514.14,ENSG00000134571.6,ENSG00000066336.7,ENSG00000165915.9,ENSG0000016…	DGKZ,MDK,CHRM4,AMBRA1,HARBI1,ATG13,ARHGAP1,ZNF408,F2,CKAP5,LRP4,C11orf49,ARFGAP2,PACSIN3,DDB2,ACP2,NR1H3,MADD,MYBPC3,SPI1,SLC39A13,PSMC3,RAPSN,CELF1,NDUFS3,PTPMT1,KBTBD4,KBTBD4,FAM180B,C1QTNF4,MTCH2,AGBL2,FNBP4,NUP160	2207female:924male:11:49
2207	924	Wears glasses or contact lenses	Usual walking pace	20	10	1.51686e-05	0.777316	0.000161166	0.00961236	-1	-1	-0.0855086	7.54688e-06	0.0295748	ENSG00000182621.12	PLCB1	2207female:924male:20:10
2207	II_NEOPLASM	Wears glasses or contact lenses	Neoplasms	8	20	3.71091e-05	0.236699	5.39187e-05	0.113362	-1	-1	-0.0457046	6.96143e-05	0.0383365	ENSG00000136574.13,ENSG00000255394.2,ENSG00000154328.11,ENSG00000079459.8,ENSG00000255046.1,ENSG00000164733.16,ENSG00000205884.2,ENSG00000205883.2,ENSG00000205882.4,ENSG00000255098.1	GATA4,C8orf49,NEIL2,FDFT1,RP11-297N6.4,CTSB,DEFB136,DEFB135,DEFB134,RP11-481A20.11	2207female:II_NEOPLASMmale:8:20
2207	II_NEOPLASM	Wears glasses or contact lenses	Neoplasms	8	49	3.29099e-05	0.459837	9.98247e-05	0.109389	1	0.179918	1	0.000121075	0.0401891	ENSG00000183779.5,ENSG00000183154.1,ENSG00000147475.10,ENSG00000147471.7,ENSG00000020181.13,ENSG00000104221.8,ENSG00000156675.11,ENSG00000169154.4,ENSG00000188778.3,ENSG00000187840.4,ENSG00000129691.11,ENSG00000147465.7,ENSG00000175324.5,ENSG00000156735.6,ENSG00000085788.9,ENSG00000147535.12,ENSG00000147548.12,ENSG00000165046.8,ENSG00000077782.15,ENSG00000196166.3,ENSG00000147526.15	ZNF703,RP11-863K10.7,ERLIN2,PROSC,GPR124,BRF2,RAB11FIP1,GOT1L1,ADRB3,EIF4EBP1,ASH2L,STAR,LSM1,BAG4,DDHD2,PPAPDC1B,WHSC1L1,LETM2,FGFR1,C8orf86,TACC1	2207female:II_NEOPLASMmale:8:49
2207	20002_1286	Wears glasses or contact lenses	Depression	6	13	8.56096e-05	0.191209	4.24698e-05	0.370807	1	0.428743	1	0.000136186	0.0406917	ENSG00000008083.9,ENSG00000047579.15,ENSG00000007944.10,ENSG00000137198.5	JARID2,DTNBP1,MYLIP,GMPR	2207female:20002_1286male:6:13
2207	20002_1286	Wears glasses or contact lenses	Depression	8	58	6.94301e-05	0.449845	5.50332e-05	0.346685	1	0.00070007	1	3.38263e-05	0.0351742	ENSG00000168300.9,ENSG00000232941.1	PCMTD1,AC090186.1	2207female:20002_1286male:8:58
2207	20002_1291	Wears glasses or contact lenses	Mania/Bipolar disorder	6	91	8.80243e-05	0.0653025	1.74423e-05	0.688598	1	0.0767077	1	8.55257e-05	0.0387952	ENSG00000164418.15	GRIK2	2207female:20002_1291male:6:91
2207	20002_1291	Wears glasses or contact lenses	Mania/Bipolar disorder	8	101	4.16006e-05	0.229549	4.7069e-05	0.491051	1	0.134913	1	0.000140081	0.0409533	ENSG00000155096.9,ENSG00000253320.1,ENSG00000155097.7,ENSG00000236939.2,ENSG00000164929.12,ENSG00000164930.7,ENSG00000164932.8,ENSG00000164933.7,ENSG00000164934.9	AZIN1,KB-1507C5.2,ATP6V1C1,C8orf56,BAALC,FZD6,CTHRC1,SLC25A32,DCAF13	2207female:20002_1291male:8:101
22501	23105	Year ended full time education	Basal metabolic rate	6	75	0.000212514	0.0886398	0.000126143	0.0446659	1	0.223522	1	6.34973e-05	0.0380297	ENSG00000118420.12,ENSG00000083097.10,ENSG00000214479.1,ENSG00000013375.11,ENSG00000013392.6,ENSG00000065833.7,ENSG00000146250.5,ENSG00000065609.10,ENSG00000203877.3,ENSG00000065615.9,ENSG00000135324.5,ENSG00000135315.7	UBE3D,DOPEY1,AL139333.1,PGM3,RWDD2A,ME1,PRSS35,SNAP91,RIPPLY2,CYB5R4,MRAP2,KIAA1009	22501female:23105male:6:75
22501	3526	Year ended full time education	Mother's age at death	16	64	0.00054898	0.0527007	0.000119654	0.142915	1	0.544154	1	0.000132223	0.0405803	ENSG00000230989.2,ENSG00000103150.4,ENSG00000260300.1,ENSG00000140961.8,ENSG00000103154.5,ENSG00000166558.6,ENSG00000140943.12,ENSG00000103160.7,ENSG00000154099.13,ENSG00000103168.12,ENSG00000140955.6,ENSG00000168418.6,ENSG00000103175.6	HSBP1,MLYCD,RP11-505K9.4,OSGIN1,NECAB2,SLC38A8,MBTPS1,HSDL1,DNAAF1,TAF1C,ADAD2,KCNG4,WFDC1	22501female:3526male:16:64
22501	50	Year ended full time education	Standing height	4	44	0.000252251	0.0224662	0.000348584	0.00670313	1	0.647765	1	0.000172811	0.042194	ENSG00000109790.12,ENSG00000157796.13,ENSG00000035928.10,ENSG00000134962.6,ENSG00000163682.11,ENSG00000121897.9,ENSG00000109814.7,ENSG00000163683.7,ENSG00000078140.9	KLHL5,WDR19,RFC1,KLB,RPL9,LIAS,UGDH,SMIM14,UBE2K	22501female:50male:4:44
22501	50	Year ended full time education	Standing height	4	144	0.000203564	0.284444	3.47842e-05	0.609416	-1	-1	-0.263326	0.000167204	0.0420477	ENSG00000164116.12,ENSG00000061918.8,ENSG00000256394.2,ENSG00000151790.4,ENSG00000256043.2,ENSG00000251283.1	GUCY1A3,GUCY1B3,ASIC5,TDO2,CTSO,RP11-171N4.2	22501female:50male:4:144
22501	50	Year ended full time education	Standing height	6	41	2.98663e-05	0.860417	0.000317406	0	1	0.114511	1	4.50593e-06	0.0262747	ENSG00000198087.7,ENSG00000164393.4,ENSG00000153294.7,ENSG00000124818.10,ENSG00000244694.3	CD2AP,GPR111,GPR115,OPN5,PTCHD4	22501female:50male:6:41
22501	50	Year ended full time education	Standing height	9	6	0.000406076	0.094063	0.000154772	0.173243	1	0.60196	1	0.000288429	0.0469751	ENSG00000080298.11,ENSG00000203286.4	RFX3,AL365202.1	22501female:50male:9:6
22501	50	Year ended full time education	Standing height	18	28	0.000614907	0.0471635	0.000220487	0.056491	1	0.547755	1	0.00034066	0.0493896	ENSG00000134779.10,ENSG00000150477.10,ENSG00000101489.14	TPGS2,KIAA1328,CELF4	22501female:50male:18:28
22501	50	Year ended full time education	Standing height	20	38	0.000126826	0.237086	0.000153913	0.0192079	1	0.0811081	1	0.000241655	0.0451585	ENSG00000101049.10,ENSG00000101052.8,ENSG00000101057.11,ENSG00000124196.5,ENSG00000124191.13,ENSG00000149596.6,ENSG00000132823.6,ENSG00000124194.11,ENSG00000197296.5,ENSG00000101074.3	SGK2,IFT52,MYBL2,GTSF1L,TOX2,JPH2,OSER1,GDAP1L1,FITM2,R3HDML	22501female:50male:20:38
22501	924	Year ended full time education	Usual walking pace	17	22	0.000424586	0.00926178	6.77434e-05	0.417732	1	0.542154	1	5.05215e-05	0.037033	ENSG00000263563.1,ENSG00000256618.1,ENSG00000109046.10	UBBP4,MTRNR2L1,WSB1	22501female:924male:17:22
22501	I9_CHD	Year ended full time education	Major coronary heart disease event	10	73	0.000252378	0.100297	3.05609e-05	0.609104	-1	-1	-0.133113	1.55197e-05	0.0328404	ENSG00000165655.14,ENSG00000148655.10	ZNF503,C10orf11	22501female:I9_CHDmale:10:73
22501	II_NEOPLASM	Year ended full time education	Neoplasms	8	20	0.000287357	0.0901077	5.39187e-05	0.113362	-1	-1	-0.324932	2.2478e-05	0.0342674	ENSG00000136574.13,ENSG00000255394.2,ENSG00000154328.11,ENSG00000079459.8,ENSG00000255046.1,ENSG00000164733.16,ENSG00000205884.2,ENSG00000205883.2,ENSG00000205882.4,ENSG00000255098.1	GATA4,C8orf49,NEIL2,FDFT1,RP11-297N6.4,CTSB,DEFB136,DEFB135,DEFB134,RP11-481A20.11	22501female:II_NEOPLASMmale:8:20
23105	3526	Basal metabolic rate	Mother's age at death	12	115	0.000152256	0.0480324	7.9714e-05	0.705833	1	0.444144	1	1.0174e-05	0.0321223			23105female:3526male:12:115
23105	50	Basal metabolic rate	Standing height	1	32	0.000586109	5.28529e-07	0.000215096	0.00315601	0.938194	0.70457	1	1.52932e-06	0.0199771	ENSG00000162521.14,ENSG00000162520.10,ENSG00000162522.6,ENSG00000134684.6,ENSG00000116497.13,ENSG00000160097.11,ENSG00000121905.5,ENSG00000121900.14,ENSG00000116514.12,ENSG00000267885.1,ENSG00000004455.12,ENSG00000142920.12,ENSG00000116525.9,ENSG00000160094.10,ENSG00000184389.8,ENSG00000134686.12,ENSG00000121903.10,ENSG00000176256.6	RBBP4,SYNC,KIAA1522,YARS,S100PBP,FNDC5,HPCA,TMEM54,RNF19B,FKSG48,AK2,ADC,TRIM62,ZNF362,A3GALT2,PHC2,ZSCAN20,HMGB4	23105female:50male:1:32
23105	50	Basal metabolic rate	Standing height	1	35	0.000298767	0.0182181	0.000708368	4.44337e-06	0.834183	0.452345	1	0.000216881	0.0440615	ENSG00000116885.14,ENSG00000116898.7,ENSG00000119535.13,ENSG00000163873.5,ENSG00000163874.8,ENSG00000163875.11,ENSG00000163877.9,ENSG00000163879.9,ENSG00000134697.8,ENSG00000169218.9,ENSG00000116922.10,ENSG00000134690.6,ENSG00000183317.12,ENSG00000185090.10,ENSG00000196449.3,ENSG00000197982.12,ENSG00000188786.9,ENSG00000230610.1,ENSG00000204084.8,ENSG00000183431.7	OSCP1,MRPS15,CSF3R,GRIK3,ZC3H12A,MEAF6,SNIP1,DNALI1,GNL2,RSPO1,C1orf109,CDCA8,EPHA10,MANEAL,YRDC,C1orf122,MTF1,AL929472.1,INPP5B,SF3A3	23105female:50male:1:35
23105	50	Basal metabolic rate	Standing height	1	104	0.00040119	0.0194535	0.0010004	0.000742793	0.865187	0.560556	0.988599	6.64807e-05	0.0381123	ENSG00000183508.4,ENSG00000196505.6,ENSG00000065183.11,ENSG00000155761.9	FAM46C,GDAP2,WDR3,SPAG17	23105female:50male:1:104
23105	50	Basal metabolic rate	Standing height	1	164	0.000566953	0.000169398	0.000431376	0.00128915	0.980998	0.690969	1	6.51165e-06	0.0281731	ENSG00000117707.11,ENSG00000143499.9,ENSG00000152104.7	PROX1,SMYD2,PTPN14	23105female:50male:1:164
23105	50	Basal metabolic rate	Standing height	1	169	0.000193167	0.116847	0.00127155	7.10954e-05	1	0.856986	1	2.87437e-08	0.00244055	ENSG00000228208.2,ENSG00000143353.7	C1orf143,LYPLAL1	23105female:50male:1:169
23105	50	Basal metabolic rate	Standing height	1	175	0.000225133	0.0178967	0.000207181	0.00163	1	0.687369	1	8.04332e-05	0.0387669	ENSG00000185842.10,ENSG00000143815.10,ENSG00000203691.2,ENSG00000154380.12,ENSG00000143742.8,ENSG00000143819.8,ENSG00000196187.7,ENSG00000243709.1,ENSG00000255835.1,ENSG00000143811.12,ENSG00000143768.7,ENSG00000143751.9,ENSG00000163041.5,ENSG00000182827.8,ENSG00000185155.7,ENSG00000183814.11	DNAH14,LBR,AC092811.1,ENAH,SRP9,EPHX1,TMEM63A,LEFTY1,RP4-559A3.7,PYCR2,LEFTY2,SDE2,H3F3A,ACBD3,MIXL1,LIN9	23105female:50male:1:175
23105	50	Basal metabolic rate	Standing height	2	27	0.000314068	0.00400183	0.000573619	0.00120584	1	0.644164	1	0.000306808	0.0478439	ENSG00000119771.10,ENSG00000224361.1,ENSG00000119778.10,ENSG00000173960.8,ENSG00000205639.5,ENSG00000163026.7,ENSG00000119782.9,ENSG00000115128.6,ENSG00000219626.4,ENSG00000115129.9,ENSG00000176732.6,ENSG00000266118.1,ENSG00000186453.8,ENSG00000198399.10	KLHL29,AC011239.1,ATAD2B,UBXN2A,MFSD2B,C2orf44,FKBP1B,SF3B14,FAM228B,TP53I3,PFN4,RP11-507M3.1,FAM228A,ITSN2	23105female:50male:2:27
23105	50	Basal metabolic rate	Standing height	2	49	0.000420431	0	0.000633174	0.000174407	0.920592	0.557956	1	0.000239607	0.0450015	ENSG00000138095.14,ENSG00000138032.16,ENSG00000138079.9,ENSG00000138078.11,ENSG00000143919.10,ENSG00000138083.3	LRPPRC,PPM1B,SLC3A1,PREPL,CAMKMT,SIX3	23105female:50male:2:49
23105	50	Basal metabolic rate	Standing height	2	63	0.000575049	5.54285e-05	0.00224569	1.37055e-05	0.90019	0.687569	0.991599	1.45217e-06	0.019746	ENSG00000163001.7,ENSG00000138041.11,ENSG00000138035.10,ENSG00000115380.14	CCDC104,SMEK2,PNPT1,EFEMP1	23105female:50male:2:63
23105	50	Basal metabolic rate	Standing height	2	77	0.000226215	0.00630201	0.000619052	2.91214e-06	1	0.783778	1	5.52713e-06	0.0274624	ENSG00000124374.8,ENSG00000075292.14,ENSG00000135636.9	PAIP2B,ZNF638,DYSF	23105female:50male:2:77
23105	50	Basal metabolic rate	Standing height	2	185	0.000349563	0.000207548	4.95562e-05	0.416343	1	0.573157	1	0.000275277	0.0463997	ENSG00000144410.4,ENSG00000118263.10,ENSG00000118260.10,ENSG00000144401.10,ENSG00000163249.5,ENSG00000163251.3	CPO,KLF7,CREB1,METTL21A,CCNYL1,FZD5	23105female:50male:2:185
23105	50	Basal metabolic rate	Standing height	2	194	0.00054185	3.76212e-05	0.00167287	0	0.868387	0.631963	0.978798	1.05837e-06	0.0179111	ENSG00000118245.2,ENSG00000223874.1	TNP1,AC007557.1	23105female:50male:2:194
23105	50	Basal metabolic rate	Standing height	2	195	0.000190769	0.0122257	0.000399775	9.04045e-06	1	0.686169	1	0.000132883	0.0405803	ENSG00000079308.12,ENSG00000188282.8,ENSG00000180871.3,ENSG00000163464.7,ENSG00000163466.11,ENSG00000179921.10,ENSG00000127837.5,ENSG00000127838.9,ENSG00000135926.8,ENSG00000158428.3,ENSG00000018280.12,ENSG00000144579.3,ENSG00000127831.6,ENSG00000135913.6,ENSG00000144580.9,ENSG00000115556.9,ENSG00000115568.11,ENSG00000074582.8,ENSG00000163481.3,ENSG00000163482.7,ENSG00000135912.6	TNS1,RUFY4,CXCR2,CXCR1,ARPC2,GPBAR1,AAMP,PNKD,TMBIM1,C2orf62,SLC11A1,CTDSP1,VIL1,USP37,RQCD1,PLCD4,ZNF142,BCS1L,RNF25,STK36,TTLL4	23105female:50male:2:195
23105	50	Basal metabolic rate	Standing height	2	208	0.000479871	0.00059146	0.0015594	1.37004e-05	0.943794	0.694369	1	5.55269e-06	0.0274624	ENSG00000173699.11,ENSG00000204128.5,ENSG00000173692.8,ENSG00000135914.5,ENSG00000135931.13,ENSG00000156966.6,ENSG00000233538.1,ENSG00000115053.11,ENSG00000171596.6,ENSG00000177673.2,ENSG00000269363.1,ENSG00000187514.10,ENSG00000156973.9,ENSG00000144524.13,ENSG00000163273.3,ENSG00000144535.15,ENSG00000163283.6,ENSG00000163286.3,ENSG00000163295.4	SPATA3,C2orf72,PSMD1,HTR2B,ARMC9,B3GNT7,AC017104.2,NCL,NMUR1,C2orf57,MGC4771,PTMA,PDE6D,COPS7B,NPPC,DIS3L2,ALPP,ALPPL2,ALPI	23105female:50male:2:208
23105	50	Basal metabolic rate	Standing height	2	209	0.00032283	3.70961e-05	0.000375234	0	1	0.70337	1	4.95543e-05	0.0370041	ENSG00000237412.2,ENSG00000135902.5,ENSG00000196811.7,ENSG00000221944.3,ENSG00000135930.9,ENSG00000115468.7,ENSG00000204120.10,ENSG00000115474.6,ENSG00000182600.5,ENSG00000066248.10,ENSG00000222001.2,ENSG00000115488.3	PRSS56,CHRND,CHRNG,TIGD1,EIF4E2,EFHD1,GIGYF2,KCNJ13,C2orf82,NGEF,AC106876.2,NEU2	23105female:50male:2:209
23105	50	Basal metabolic rate	Standing height	3	15	0.000605364	2.07631e-06	0.000533067	0.00113296	0.812781	0.488349	0.989199	4.53211e-05	0.0365738	ENSG00000144713.8,ENSG00000144711.9,ENSG00000132182.7,ENSG00000163517.10,ENSG00000163520.9,ENSG00000154764.5,ENSG00000180438.10,ENSG00000163528.8,ENSG00000170876.7,ENSG00000268279.2,ENSG00000154767.10,ENSG00000170860.3	RPL32,IQSEC1,NUP210,HDAC11,FBLN2,WNT7A,TPRXL,CHCHD4,TMEM43,RP11-434D12.1,XPC,LSM3	23105female:50male:3:15
23105	50	Basal metabolic rate	Standing height	3	16	0.000229979	0.0279266	0.000719145	0.0329078	0.993199	0.677968	1	1.41653e-05	0.0328404	ENSG00000131389.12,ENSG00000154781.11,ENSG00000131379.5,ENSG00000154783.6,ENSG00000177463.11,ENSG00000131368.3,ENSG00000131381.8	SLC6A6,CCDC174,C3orf20,FGD5,NR2C2,MRPS25,ZFYVE20	23105female:50male:3:16
23105	50	Basal metabolic rate	Standing height	3	29	0.000140012	0.113685	0.000152544	0.182665	1	0.633963	1	5.52673e-05	0.0375025			23105female:50male:3:29
23105	50	Basal metabolic rate	Standing height	3	30	0.000211068	0.0517994	0.000279266	0.0174137	1	0.586559	1	0.00034881	0.0496302	ENSG00000163513.13,ENSG00000144644.10	TGFBR2,GADL1	23105female:50male:3:30
23105	50	Basal metabolic rate	Standing height	3	49	0.000239246	0.0295829	0.000751516	1.00655e-08	0.929593	0.60376	1	4.56706e-05	0.0366605	ENSG00000180376.12,ENSG00000163946.9	CCDC66,FAM208A	23105female:50male:3:49
23105	50	Basal metabolic rate	Standing height	3	124	0.00126602	6.08136e-10	0.0032208	3.06832e-10	0.625163	0.383938	0.774577	2.62253e-05	0.0347075	ENSG00000177311.6,ENSG00000155903.7,ENSG00000114125.9,ENSG00000114124.2,ENSG00000069849.6,ENSG00000114126.13	ZBTB38,RASA2,RNF7,GRK7,ATP1B3,TFDP2	23105female:50male:3:124
23105	50	Basal metabolic rate	Standing height	3	150	0.000122287	0.124071	0.000537022	0.0100565	1	0.737374	1	3.29623e-05	0.035163	ENSG00000184378.2,ENSG00000085274.11,ENSG00000171757.11,ENSG00000188306.6,ENSG00000114248.5,ENSG00000187033.5,ENSG00000008952.12,ENSG00000173890.12,ENSG00000173889.11,ENSG00000163558.8,ENSG00000136603.9	ACTRT3,MYNN,LRRC34,LRRIQ4,LRRC31,SAMD7,SEC62,GPR160,PHC3,PRKCI,SKIL	23105female:50male:3:150
23105	50	Basal metabolic rate	Standing height	3	152	0.000512347	0.000207371	0.00112193	2.82703e-09	0.779578	0.465947	0.946995	4.42251e-05	0.0363745	ENSG00000075651.11,ENSG00000183657.2,ENSG00000186329.5	PLD1,PP13439,TMEM212	23105female:50male:3:152
23105	50	Basal metabolic rate	Standing height	3	161	0.0003811	0.0352863	0.000263261	0.0401076	1	0.750975	1	7.77822e-06	0.0298892	ENSG00000172578.7,ENSG00000114796.11,ENSG00000163872.11,ENSG00000180834.3,ENSG00000175193.8,ENSG00000114770.12,ENSG00000186090.6,ENSG00000178084.1,ENSG00000186038.5,ENSG00000145191.7,ENSG00000161202.13,ENSG00000161203.9,ENSG00000161204.7,ENSG00000145198.10,ENSG00000214160.5,ENSG00000145194.13,ENSG00000163888.3,ENSG00000175166.12,ENSG00000114867.15,ENSG00000175182.9,ENSG00000114859.10,ENSG00000163…	KLHL6,KLHL24,YEATS2,MAP6D1,PARL,ABCC5,HTR3D,HTR3C,HTR3E,EIF2B5,DVL3,AP2M1,ABCF3,VWA5B2,ALG3,ECE2,CAMK2N2,PSMD2,EIF4G1,FAM131A,CLCN2,POLR2H,THPO,CHRD,RP11-433C9.2,EPHB3,MAGEF1	23105female:50male:3:161
23105	50	Basal metabolic rate	Standing height	4	3	0.000254667	0.0185113	0.00092599	0.00042647	1	0.669167	1	0.0001017	0.0389938	ENSG00000174137.8,ENSG00000163950.8,ENSG00000168936.6,ENSG00000013810.14,ENSG00000068078.13,ENSG00000168924.10,ENSG00000109685.13,ENSG00000185049.8,ENSG00000243449.2,ENSG00000185818.7,ENSG00000130997.12,ENSG00000214367.3,ENSG00000123933.10,ENSG00000159733.9	FAM53A,SLBP,TMEM129,TACC3,FGFR3,LETM1,WHSC1,NELFA,C4orf48,NAT8L,POLN,HAUS3,MXD4,ZFYVE28	23105female:50male:4:3
23105	50	Basal metabolic rate	Standing height	4	17	0.000229752	0.0163228	0.000714873	0.000415947	0.989799	0.589759	1	0.000237674	0.0449591			23105female:50male:4:17
23105	50	Basal metabolic rate	Standing height	4	22	0.000835125	9.3588e-07	0.00317817	3.14959e-11	0.844384	0.589359	0.955196	4.93957e-06	0.026979	ENSG00000151552.7,ENSG00000249581.2,ENSG00000002549.8,ENSG00000118579.7,ENSG00000047662.4,ENSG00000163257.6,ENSG00000109805.5,ENSG00000178177.10	QDPR,CLRN2,LAP3,MED28,FAM184B,DCAF16,NCAPG,LCORL	23105female:50male:4:22
23105	50	Basal metabolic rate	Standing height	4	99	0.00059497	8.96681e-06	0.000627496	0.000741623	1	0.775178	1	4.04425e-05	0.0363739	ENSG00000168772.9,ENSG00000168769.8,ENSG00000138777.15	CXXC4,TET2,PPA2	23105female:50male:4:99
23105	50	Basal metabolic rate	Standing height	4	116	0.000382944	0	0.000393801	0.0572846	1	0.813181	1	1.40555e-06	0.019746	ENSG00000164112.8,ENSG00000226757.1,ENSG00000123737.8,ENSG00000145386.5,ENSG00000138686.5,ENSG00000138741.6,ENSG00000138688.11,ENSG00000164113.6,ENSG00000109471.4,ENSG00000138684.3,ENSG00000181004.5	TMEM155,AC079341.1,EXOSC9,CCNA2,BBS7,TRPC3,KIAA1109,ADAD1,IL2,IL21,BBS12	23105female:50male:4:116
23105	50	Basal metabolic rate	Standing height	4	135	0.00113665	0.000467869	0.00304438	0	1	0.861586	1	6.00497e-07	0.015296	ENSG00000153147.5,ENSG00000183090.5,ENSG00000197465.9,ENSG00000250361.2,ENSG00000170180.15,ENSG00000164161.5,ENSG00000164162.8,ENSG00000164163.6,ENSG00000164164.11	SMARCA5,FREM3,GYPE,GYPB,GYPA,HHIP,ANAPC10,ABCE1,OTUD4	23105female:50male:4:135
23105	50	Basal metabolic rate	Standing height	5	31	0.000138029	0.184384	0.00120035	0.00140089	1	0.780778	1	4.13017e-08	0.00300585	ENSG00000181495.1,ENSG00000113407.9,ENSG00000151388.6,ENSG00000182631.5	AC026703.1,TARS,ADAMTS12,RXFP3	23105female:50male:5:31
23105	50	Basal metabolic rate	Standing height	5	38	0.000530699	0.000247653	0.00111017	0	0.888589	0.678968	0.968797	3.50273e-06	0.0251331	ENSG00000182836.5,ENSG00000083720.8,ENSG00000205765.4,ENSG00000151876.8,ENSG00000112964.9,ENSG00000198865.5	PLCXD3,OXCT1,C5orf51,FBXO4,GHR,CCDC152	23105female:50male:5:38
23105	50	Basal metabolic rate	Standing height	5	59	0.00029631	0.023755	0.00180823	0.000511122	0.889789	0.593559	1	1.08265e-05	0.0324382	ENSG00000253787.1,ENSG00000145675.10	RP11-404L6.2,PIK3R1	23105female:50male:5:59
23105	50	Basal metabolic rate	Standing height	5	105	0.000697778	0.00012373	0.000612469	3.21636e-06	0.927993	0.69517	1	3.77259e-06	0.026118	ENSG00000205302.2,ENSG00000064652.6,ENSG00000168938.5,ENSG00000061455.10,ENSG00000168944.11,ENSG00000151292.13	SNX2,SNX24,PPIC,PRDM6,CEP120,CSNK1G3	23105female:50male:5:105
23105	50	Basal metabolic rate	Standing height	5	106	0.000311559	0.0425212	0.000214928	0.0282287	1	0.636964	1	0.000101561	0.0389938	ENSG00000168916.11	ZNF608	23105female:50male:5:106
23105	50	Basal metabolic rate	Standing height	5	114	0.00027015	0.0770085	0.00114931	1.09128e-08	0.850385	0.458546	1	0.000189474	0.0428134	ENSG00000113583.6,ENSG00000213585.6,ENSG00000081059.15,ENSG00000113558.14,ENSG00000272772.1,ENSG00000113575.5,ENSG00000006837.7,ENSG00000119048.3,ENSG00000237190.3,ENSG00000043143.16,ENSG00000152700.9,ENSG00000113615.8,ENSG00000164615.3,ENSG00000145833.11,ENSG00000181904.8,ENSG00000113621.10,ENSG00000132570.10,ENSG00000152705.6,ENSG00000069011.11	C5orf15,VDAC1,TCF7,SKP1,CTD-2410N18.5,PPP2CA,CDKL3,UBE2B,CDKN2AIPNL,JADE2,SAR1B,SEC24A,CAMLG,DDX46,C5orf24,TXNDC15,PCBD2,CATSPER3,PITX1	23105female:50male:5:114
23105	50	Basal metabolic rate	Standing height	5	144	0.000217866	0.11423	0.00108216	0.00064332	1	0.826983	1	5.72325e-08	0.00334481	ENSG00000253110.1,ENSG00000185662.4,ENSG00000072803.13,ENSG00000072786.8,ENSG00000214360.4,ENSG00000168246.5,ENSG00000174705.7,ENSG00000268553.1,ENSG00000214357.4,ENSG00000120129.5	CTB-78H18.1,SMIM23,FBXW11,STK10,EFCAB9,UBTD2,SH3PXD2B,AC027309.1,NEURL1B,DUSP1	23105female:50male:5:144
23105	50	Basal metabolic rate	Standing height	5	145	0.000654792	0.00822027	0.00130797	5.10148e-05	0.911591	0.725573	1	2.7903e-09	0.000406143	ENSG00000037241.3,ENSG00000113732.4,ENSG00000164463.8,ENSG00000113734.13,ENSG00000183072.9,ENSG00000113739.6,ENSG00000145919.6,ENSG00000113742.8,ENSG00000185056.9	RPL26L1,ATP6V0E1,CREBRF,BNIP1,NKX2-5,STC2,BOD1,CPEB4,C5orf47	23105female:50male:5:145
23105	50	Basal metabolic rate	Standing height	6	2	0.000276244	0.00334952	0.000505577	0.0017458	1	0.619362	1	5.65409e-05	0.0375025	ENSG00000137273.3,ENSG00000054598.5,ENSG00000112699.6,ENSG00000164385.5	FOXF2,FOXC1,GMDS,C6orf195	23105female:50male:6:2
23105	50	Basal metabolic rate	Standing height	6	7	0.000499732	0	0.0036937	7.72827e-14	1	0.846385	1	1.22531e-10	3.12114e-05	ENSG00000124782.15,ENSG00000124783.8,ENSG00000164304.11,ENSG00000124784.4,ENSG00000096696.9,ENSG00000168566.11	RREB1,SSR1,CAGE1,RIOK1,DSP,SNRNP48	23105female:50male:6:7
23105	50	Basal metabolic rate	Standing height	6	18	0.000272971	0.00511752	0.00100107	0.0492316	0.794979	0.427743	0.997	0.000292046	0.0471544	ENSG00000172201.6,ENSG00000172197.9	ID4,MBOAT1	23105female:50male:6:18
23105	50	Basal metabolic rate	Standing height	6	29	0.00175965	2.06695e-10	0.0052738	1.21834e-06	0.69577	0.535554	0.791579	3.35031e-08	0.00262584	ENSG00000124493.9,ENSG00000137309.15,ENSG00000186577.7,ENSG00000272325.1,ENSG00000270800.1,ENSG00000124614.9,ENSG00000124507.6,ENSG00000124664.6,ENSG00000196821.5,ENSG00000124562.5,ENSG00000065060.12,ENSG00000064995.12	GRM4,HMGA1,C6orf1,NUDT3,RPS10-NUDT3,RPS10,PACSIN1,SPDEF,C6orf106,SNRPC,UHRF1BP1,TAF11	23105female:50male:6:29
23105	50	Basal metabolic rate	Standing height	6	35	0.000425125	0.00122831	0.000615338	0	1	0.759976	1	1.94155e-06	0.0211376	ENSG00000124602.5,ENSG00000124596.12,ENSG00000112212.7,ENSG00000124701.5,ENSG00000001167.10,ENSG00000161911.7,ENSG00000095970.12,ENSG00000112195.8,ENSG00000188056.7,ENSG00000124731.8,ENSG00000096264.9,ENSG00000137166.10,ENSG00000112559.9,ENSG00000112561.13,ENSG00000268275.1,ENSG00000096088.12,ENSG00000137218.6,ENSG00000124593.10,ENSG00000214736.3,ENSG00000164663.9,ENSG00000124641.10,ENSG000001125…	UNC5CL,OARD1,TSPO2,APOBEC2,NFYA,TREML1,TREM2,TREML2,TREML4,TREM1,NCR2,FOXP4,MDFI,TFEB,AL035588.1,PGC,FRS3,PRICKLE4,TOMM6,USP49,MED20,BYSL,CCND3,TAF8	23105female:50male:6:35
23105	50	Basal metabolic rate	Standing height	6	72	0.000605304	0.000412167	0.00150461	0.0126642	0.936994	0.741374	0.994599	9.91788e-06	0.0319518	ENSG00000112742.5,ENSG00000083123.10	TTK,BCKDHB	23105female:50male:6:72
23105	50	Basal metabolic rate	Standing height	6	73	0.000231935	0.0080246	0.000715489	0.0047551	1	0.775378	1	0.000122516	0.0402162	ENSG00000269494.1	AL359693.1	23105female:50male:6:73
23105	50	Basal metabolic rate	Standing height	6	95	0.000430096	0.000136362	0.00143894	1.61883e-08	0.790179	0.518152	0.940594	8.36406e-06	0.0305911	ENSG00000085382.7,ENSG00000187772.6,ENSG00000112276.9,ENSG00000132429.5,ENSG00000085377.9	HACE1,LIN28B,BVES,POPDC3,PREP	23105female:50male:6:95
23105	50	Basal metabolic rate	Standing height	6	97	0.000703686	3.13582e-08	0.000826218	6.14603e-08	0.723972	0.415342	0.90359	8.02302e-05	0.0387669	ENSG00000130349.5,ENSG00000178409.9,ENSG00000164494.7,ENSG00000112320.7,ENSG00000146285.9,ENSG00000025796.9,ENSG00000081087.10,ENSG00000112333.7,ENSG00000112335.10,ENSG00000135537.12,ENSG00000118689.10	C6orf203,BEND3,PDSS2,SOBP,SCML4,SEC63,OSTM1,NR2E1,SNX3,LACE1,FOXO3	23105female:50male:6:97
23105	50	Basal metabolic rate	Standing height	6	105	9.70405e-05	0.111672	0.000224016	0.0435535	1	0.616362	1	0.000208407	0.0437892	ENSG00000164465.14,ENSG00000153989.7	DCBLD1,NUS1	23105female:50male:6:105
23105	50	Basal metabolic rate	Standing height	6	113	0.000457803	4.48584e-06	0.00124679	1.54435e-14	0.864586	0.564756	0.9992	2.23032e-05	0.0340966	ENSG00000111907.16,ENSG00000111906.13,ENSG00000135547.4,ENSG00000111912.14,ENSG00000111911.5,ENSG00000066651.13,ENSG00000203760.4,ENSG00000146374.9	TPD52L1,HDDC2,HEY2,NCOA7,HINT3,TRMT11,CENPW,RSPO3	23105female:50male:6:113
23105	50	Basal metabolic rate	Standing height	6	116	0.0009134	1.62378e-09	0.000969355	3.58633e-07	0.979798	0.764976	1	9.17579e-08	0.0042496	ENSG00000146376.6,ENSG00000203756.3,ENSG00000198945.3	ARHGAP18,TMEM244,L3MBTL3	23105female:50male:6:116
23105	50	Basal metabolic rate	Standing height	6	124	0.000322791	0.00224913	0.000377581	0.00168448	0.906791	0.510351	1	0.000338616	0.0493097			23105female:50male:6:124
23105	50	Basal metabolic rate	Standing height	6	125	0.000443567	0.000334835	0.00151656	0	0.754775	0.417142	0.925993	0.0002541	0.0455044	ENSG00000135577.4,ENSG00000203733.5,ENSG00000009844.11,ENSG00000112414.10	NMBR,GJE1,VTA1,GPR126	23105female:50male:6:125
23105	50	Basal metabolic rate	Standing height	6	133	0.000430366	8.79927e-05	0.00168237	1.15899e-07	0.818182	0.539954	0.947395	1.62497e-05	0.0328404	ENSG00000181472.4,ENSG00000155906.12,ENSG00000146476.6,ENSG00000120262.8	ZBTB2,RMND1,C6orf211,CCDC170	23105female:50male:6:133
23105	50	Basal metabolic rate	Standing height	6	143	0.000126948	0.000191245	0.000255195	0.000210514	1	0.767177	1	4.88907e-05	0.0370041	ENSG00000112499.8,ENSG00000146477.4,ENSG00000198670.7,ENSG00000122194.14	SLC22A2,SLC22A3,LPA,PLG	23105female:50male:6:143
23105	50	Basal metabolic rate	Standing height	6	151	0.00029163	0	0.000978044	5.90054e-05	1	0.749775	1	2.69496e-06	0.0232701	ENSG00000112562.14,ENSG00000186340.10	SMOC2,THBS2	23105female:50male:6:151
23105	50	Basal metabolic rate	Standing height	7	4	0.000392937	2.58251e-07	0.0010322	3.61775e-16	0.881388	0.619762	0.986399	8.35529e-06	0.0305911	ENSG00000106003.8,ENSG00000106009.11,ENSG00000106012.13,ENSG00000136295.10,ENSG00000174945.9,ENSG00000146535.9,ENSG00000198286.5	LFNG,BRAT1,IQCE,TTYH3,AMZ1,GNA12,CARD11	23105female:50male:7:4
23105	50	Basal metabolic rate	Standing height	7	11	0.000186067	0.000629468	0.000510996	5.29074e-07	0.929193	0.528753	1	0.000179827	0.0424803	ENSG00000106415.8,ENSG00000003147.13	GLCCI1,ICA1	23105female:50male:7:11
23105	50	Basal metabolic rate	Standing height	7	29	0.000436467	0.000334608	0.000753625	4.58515e-05	0.884388	0.517352	1	0.000336673	0.0492657	ENSG00000122550.13,ENSG00000214871.3,ENSG00000136243.12,ENSG00000136235.11,ENSG00000156928.4,ENSG00000136231.9,ENSG00000164548.6,ENSG00000169193.7,ENSG00000188732.6,ENSG00000196335.8	KLHL7,AC005082.1,NUPL2,GPNMB,MALSU1,IGF2BP3,TRA2A,CCDC126,FAM221A,STK31	23105female:50male:7:29
23105	50	Basal metabolic rate	Standing height	7	42	0.000125394	0.109937	0.000472452	0.00182546	1	0.731373	1	2.19323e-05	0.0340966	ENSG00000010270.9,ENSG00000078053.12,ENSG00000164556.7	STARD3NL,AMPH,FAM183B	23105female:50male:7:42
23105	50	Basal metabolic rate	Standing height	7	49	0.000362464	0.0084855	0.000856792	0.00297659	1	0.80378	1	9.45195e-07	0.0174876	ENSG00000233539.2	AC011294.3	23105female:50male:7:49
23105	50	Basal metabolic rate	Standing height	7	75	0.000197179	0.0195402	0.000150874	0.00732981	1	0.411341	1	8.0712e-05	0.0387669	ENSG00000135205.10,ENSG00000127951.5,ENSG00000186088.11,ENSG00000127947.11,ENSG00000187257.10,ENSG00000135211.5,ENSG00000006576.12	CCDC146,FGL2,GSAP,PTPN12,RSBN1L,TMEM60,PHTF2	23105female:50male:7:75
23105	50	Basal metabolic rate	Standing height	7	86	0.00111097	1.71565e-10	0.00210529	6.09713e-12	0.792179	0.617162	0.893189	8.90482e-09	0.000907303	ENSG00000157240.2,ENSG00000127989.9,ENSG00000127914.12,ENSG00000001630.11,ENSG00000240720.3,ENSG00000001631.10,ENSG00000001629.5,ENSG00000157259.6,ENSG00000242950.2,ENSG00000127980.11,ENSG00000127993.10,ENSG00000234545.3,ENSG00000105810.5	FZD1,MTERF,AKAP9,CYP51A1,LRRD1,KRIT1,ANKIB1,GATAD1,ERVW-1,PEX1,RBM48,FAM133B,CDK6	23105female:50male:7:86
23105	50	Basal metabolic rate	Standing height	7	87	0.000292972	0.00243607	0.000240358	0.0984154	1	0.730573	1	1.87692e-05	0.033363	ENSG00000205413.3,ENSG00000177409.7,ENSG00000188175.5,ENSG00000004766.11,ENSG00000004948.9,ENSG00000127928.8,ENSG00000105825.7,ENSG00000127920.5,ENSG00000105829.7	SAMD9,SAMD9L,HEPACAM2,CCDC132,CALCR,GNGT1,TFPI2,GNG11,BET1	23105female:50male:7:87
23105	50	Basal metabolic rate	Standing height	7	130	0.000805687	1.75573e-06	0.000885429	7.55954e-06	0.759576	0.419342	0.932793	0.000183914	0.0426206	ENSG00000106526.6,ENSG00000127399.10,ENSG00000188707.4,ENSG00000106538.5,ENSG00000214022.7,ENSG00000196456.4,ENSG00000171115.3,ENSG00000179144.4,ENSG00000133574.5,ENSG00000133561.11,ENSG00000106560.6,ENSG00000213203.2,ENSG00000196329.6,ENSG00000106565.13,ENSG00000002933.3,ENSG00000002726.15,ENSG00000055118.10,ENSG00000164867.6,ENSG00000181652.14,ENSG00000197150.8,ENSG00000213199.3,ENSG00000164885…	ACTR3C,LRRC61,ZBED6CL,RARRES2,REPIN1,ZNF775,GIMAP8,GIMAP7,GIMAP4,GIMAP6,GIMAP2,GIMAP1,GIMAP5,TMEM176B,TMEM176A,AOC1,KCNH2,NOS3,ATG9B,ABCB8,ASIC3,CDK5,SLC4A2,FASTK,TMUB1,AGAP3,GBX1,ASB10	23105female:50male:7:130
23105	50	Basal metabolic rate	Standing height	8	37	0.000387797	0.00109838	0.000762699	3.89375e-06	0.972597	0.611961	1	2.54689e-05	0.0346708	ENSG00000173535.9,ENSG00000173530.5,ENSG00000104689.5,ENSG00000147457.9,ENSG00000104679.6,ENSG00000134013.11,ENSG00000197217.8,ENSG00000147454.9,ENSG00000268085.1,ENSG00000215298.3,ENSG00000167034.9,ENSG00000180053.6,ENSG00000159167.7	TNFRSF10C,TNFRSF10D,TNFRSF10A,CHMP7,R3HCC1,LOXL2,ENTPD4,SLC25A37,AC051642.1,FP15737,NKX3-1,NKX2-6,STC1	23105female:50male:8:37
23105	50	Basal metabolic rate	Standing height	8	62	0.000530369	0.00229096	0.00194044	0.000196399	0.963596	0.761376	1	1.78635e-06	0.0211376	ENSG00000167904.10,ENSG00000137574.6,ENSG00000254087.3,ENSG00000008988.5,ENSG00000172680.1,ENSG00000181690.3,ENSG00000170791.13,ENSG00000170786.8,ENSG00000181195.6	TMEM68,TGS1,LYN,RPS20,MOS,PLAG1,CHCHD7,SDR16C5,PENK	23105female:50male:8:62
23105	50	Basal metabolic rate	Standing height	8	81	0.000302667	0.00760514	0.00111204	0.000133953	1	0.672767	1	3.27112e-05	0.035163	ENSG00000091656.11,ENSG00000164751.10	ZFHX4,PEX2	23105female:50male:8:81
23105	50	Basal metabolic rate	Standing height	8	116	0.0002662	0.020137	0.000624895	0.00199655	1	0.680368	1	9.78799e-05	0.0388849	ENSG00000136999.4,ENSG00000136960.8,ENSG00000064313.7,ENSG00000136982.5,ENSG00000155792.5,ENSG00000187955.7,ENSG00000172172.3	NOV,ENPP2,TAF2,DSCC1,DEPTOR,COL14A1,MRPL13	23105female:50male:8:116
23105	50	Basal metabolic rate	Standing height	8	118	0.000284128	0.00405678	0.00100731	0.00484568	0.794179	0.49895	0.964596	1.77506e-05	0.0331133	ENSG00000178764.6	ZHX2	23105female:50male:8:118
23105	50	Basal metabolic rate	Standing height	8	124	0.000225989	0.00922227	0.0023171	2.54867e-08	0.876788	0.584558	0.9996	2.46597e-05	0.034513	ENSG00000147697.4,ENSG00000153310.14,ENSG00000153317.10	GSDMC,FAM49B,ASAP1	23105female:50male:8:124
23105	50	Basal metabolic rate	Standing height	8	129	0.000671665	4.38317e-06	0.000959772	2.30584e-05	1	0.807781	1	4.57402e-08	0.00310694	ENSG00000066827.11	ZFAT	23105female:50male:8:129
23105	50	Basal metabolic rate	Standing height	9	74	0.00039476	0.0838547	0.003668	7.81551e-05	1	0.810781	1	2.3644e-07	0.0086038	ENSG00000148120.10,ENSG00000158169.7,ENSG00000185920.11,ENSG00000268926.1,ENSG00000182150.11	C9orf3,FANCC,PTCH1,DKFZP434H0512,ERCC6L2	23105female:50male:9:74
23105	50	Basal metabolic rate	Standing height	9	95	0.000595178	0.00131104	0.00059443	0.000923078	1	0.848185	1	6.76371e-08	0.00344574	ENSG00000256040.1,ENSG00000119401.10	PAPPA-AS1,TRIM32	23105female:50male:9:95
23105	50	Basal metabolic rate	Standing height	10	28	0.000168304	0.0800499	0.000386346	0.0013942	1	0.781978	1	4.44579e-07	0.0137266	ENSG00000269879.1,ENSG00000107863.12,ENSG00000099256.14,ENSG00000151023.12,ENSG00000185875.8	AL353583.1,ARHGAP21,PRTFDC1,ENKUR,THNSL1	23105female:50male:10:28
23105	50	Basal metabolic rate	Standing height	10	75	0.000560505	5.25067e-06	0.00173939	9.29864e-06	0.657966	0.378538	0.847185	4.32772e-05	0.0363745	ENSG00000108175.12,ENSG00000108179.9	ZMIZ1,PPIF	23105female:50male:10:75
23105	50	Basal metabolic rate	Standing height	10	110	4.37026e-05	0.641139	0.000767798	9.65905e-06	1	0.69677	1	3.4849e-06	0.0251331	ENSG00000188613.5,ENSG00000107581.8,ENSG00000119979.11,ENSG00000183605.12,ENSG00000165672.5,ENSG00000198873.10,ENSG00000148908.10,ENSG00000151923.13,ENSG00000151929.5,ENSG00000198825.7,ENSG00000197771.8,ENSG00000107651.8	NANOS1,EIF3A,FAM45A,SFXN4,PRDX3,GRK5,RGS10,TIAL1,BAG3,INPP5F,MCMBP,SEC23IP	23105female:50male:10:110
23105	50	Basal metabolic rate	Standing height	11	3	0.00103912	0	0.000649215	0.0625587	0.951195	0.675368	1	4.48473e-06	0.0262747	ENSG00000130598.11,ENSG00000130592.9,ENSG00000184682.5,ENSG00000130595.12,ENSG00000214026.6,ENSG00000167244.13,ENSG00000129965.9,ENSG00000254647.2,ENSG00000180176.10,ENSG00000183734.4,ENSG00000110665.7,ENSG00000064201.11,ENSG00000110651.7,ENSG00000184281.10,ENSG00000070985.9	TNNI2,LSP1,C11orf89,TNNT3,MRPL23,IGF2,INS-IGF2,INS,TH,ASCL2,C11orf21,TSPAN32,CD81,TSSC4,TRPM5	23105female:50male:11:3
23105	50	Basal metabolic rate	Standing height	11	4	0.000382633	0.0319926	0.000286894	0.454235	1	0.646965	1	4.47462e-05	0.0364358	ENSG00000129757.8,ENSG00000254827.1,ENSG00000110628.9,ENSG00000181649.5,ENSG00000205531.8,ENSG00000183562.2,ENSG00000110619.12,ENSG00000021762.15,ENSG00000182170.3,ENSG00000184350.8	CDKN1C,SLC22A18AS,SLC22A18,PHLDA2,NAP1L4,AC131971.1,CARS,OSBPL5,MRGPRG,MRGPRE	23105female:50male:11:4
23105	50	Basal metabolic rate	Standing height	11	69	0.000328988	0.0117258	0.000340852	0.00722374	1	0.70317	1	2.64934e-05	0.0347075	ENSG00000131620.13,ENSG00000168040.4,ENSG00000131626.11,ENSG00000085733.11,ENSG00000162105.12,ENSG00000172893.11,ENSG00000172890.7,ENSG00000244411.2	ANO1,FADD,PPFIA1,CTTN,SHANK2,DHCR7,NADSYN1,KRTAP5-7	23105female:50male:11:69
23105	50	Basal metabolic rate	Standing height	12	4	0.000492789	0.0161292	0.000457325	0.00354119	0.791579	0.440944	1	0.00013239	0.0405803	ENSG00000011105.7,ENSG00000111218.7	TSPAN9,PRMT8	23105female:50male:12:4
23105	50	Basal metabolic rate	Standing height	12	13	0.000290504	0.00390828	0.00102593	7.53971e-11	0.869387	0.583758	1	4.16831e-06	0.0262747	ENSG00000139083.6,ENSG00000121380.8,ENSG00000070018.4,ENSG00000111261.9,ENSG00000205791.2,ENSG00000165714.6,ENSG00000111266.4	ETV6,BCL2L14,LRP6,MANSC1,LOH12CR2,LOH12CR1,DUSP16	23105female:50male:12:13
23105	50	Basal metabolic rate	Standing height	12	29	0.00022634	9.87826e-05	0.000762388	1.80033e-07	0.987199	0.727373	1	3.34067e-05	0.0351742	ENSG00000174236.2,ENSG00000061794.8,ENSG00000205693.3,ENSG00000087448.5,ENSG00000087494.11,ENSG00000123106.6	REP15,MRPS35,MANSC4,KLHL42,PTHLH,CCDC91	23105female:50male:12:29
23105	50	Basal metabolic rate	Standing height	12	46	0.000622235	0.000479501	0.000574855	0.000203778	0.876388	0.551355	1	0.000115269	0.039782	ENSG00000189079.11,ENSG00000139218.13,ENSG00000111371.11,ENSG00000134294.9,ENSG00000139209.11,ENSG00000139211.5	ARID2,SCAF11,SLC38A1,SLC38A2,SLC38A4,AMIGO2	23105female:50male:12:46
23105	50	Basal metabolic rate	Standing height	12	61	0.000371335	0.000303746	0.000451164	0.000289658	1	0.734373	1	2.23042e-05	0.0340966	ENSG00000174206.8,ENSG00000185306.8,ENSG00000184575.7,ENSG00000183735.5,ENSG00000153179.7,ENSG00000268028.1,ENSG00000135677.6,ENSG00000111490.8,ENSG00000156076.5,ENSG00000174106.2,ENSG00000174099.6	C12orf66,C12orf56,XPOT,TBK1,RASSF3,AC025262.1,GNS,TBC1D30,WIF1,LEMD3,MSRB3	23105female:50male:12:61
23105	50	Basal metabolic rate	Standing height	12	62	0.00178174	0.000477004	0.00412147	7.28648e-06	0.937994	0.840784	0.984398	5.71589e-14	5.82386e-08	ENSG00000149948.9,ENSG00000197301.3,ENSG00000267942.1,ENSG00000139233.2,ENSG00000228144.2,ENSG00000155957.12,ENSG00000090376.4,ENSG00000127311.5	HMGA2,RP11-366L20.2,AC090673.2,LLPH,TMBIM4,TMBIM4,IRAK3,HELB	23105female:50male:12:62
23105	50	Basal metabolic rate	Standing height	12	72	0.00013091	0.211858	0.000509863	0.00425717	1	0.722572	1	4.21839e-06	0.0262747	ENSG00000179941.6,ENSG00000091039.12,ENSG00000186908.10,ENSG00000175183.5,ENSG00000165891.11	BBS10,OSBPL8,ZDHHC17,CSRP2,E2F7	23105female:50male:12:72
23105	50	Basal metabolic rate	Standing height	12	85	0.00103594	0	0.00234087	1.87351e-10	0.89919	0.758576	0.971197	3.60216e-11	1.2234e-05	ENSG00000173598.9,ENSG00000177889.5,ENSG00000198015.8,ENSG00000120833.9,ENSG00000169372.8	NUDT4,UBE2N,MRPL42,SOCS2,CRADD	23105female:50male:12:85
23105	50	Basal metabolic rate	Standing height	12	89	0.000218814	0.19645	0.000362766	0.0176619	1	0.678168	1	8.88927e-05	0.0387952	ENSG00000188596.5,ENSG00000139350.7	C12orf55,NEDD1	23105female:50male:12:89
23105	50	Basal metabolic rate	Standing height	12	93	0.000221918	0.396258	0.00078022	0.054227	1	0.716772	1	6.1185e-05	0.0378636	ENSG00000166211.6,ENSG00000196091.8,ENSG00000111666.6,ENSG00000139351.10,ENSG00000111670.10,ENSG00000136048.9,ENSG00000120860.6,ENSG00000075188.4,ENSG00000185480.7,ENSG00000183395.4,ENSG00000017427.11	SPIC,MYBPC1,CHPT1,SYCP3,GNPTAB,DRAM1,CCDC53,NUP37,PARPBP,PMCH,IGF1	23105female:50male:12:93
23105	50	Basal metabolic rate	Standing height	12	94	0.000561147	0.000853403	0.000395976	0.187032	1	0.734373	1	8.53521e-06	0.0306212	ENSG00000171759.4,ENSG00000139352.3,ENSG00000257860.1,ENSG00000179088.10	PAH,ASCL1,RP11-552I14.1,C12orf42	23105female:50male:12:94
23105	50	Basal metabolic rate	Standing height	12	102	0.000187043	0.0847472	0.000106258	0.055454	1	0.29833	1	7.43822e-05	0.0387441	ENSG00000198324.10,ENSG00000111252.6,ENSG00000204842.10,ENSG00000089234.11,ENSG00000111271.10,ENSG00000257767.2,ENSG00000111275.8,ENSG00000089022.9,ENSG00000198270.8,ENSG00000089248.6,ENSG00000111300.5,ENSG00000135148.7,ENSG00000173064.6,ENSG00000089009.11,ENSG00000179295.11,ENSG00000089169.10,ENSG00000089127.8,ENSG00000111331.8,ENSG00000111335.8,ENSG00000135144.3,ENSG00000111344.7,ENSG0000018671…	FAM109A,SH2B3,ATXN2,BRAP,ACAD10,RP11-162P23.2,ALDH2,MAPKAPK5,TMEM116,ERP29,NAA25,TRAFD1,HECTD4,RPL6,PTPN11,RPH3A,OAS1,OAS3,OAS2,DTX1,RASAL1,CCDC42B,DDX54,RITA1,IQCD,TPCN1,SLC8B1,PLBD2,SDS,SDSL,LHX5	23105female:50male:12:102
23105	50	Basal metabolic rate	Standing height	12	107	0.000216177	0.0121963	0.000133208	0	1	0.553955	1	2.79928e-05	0.035163	ENSG00000111412.4,ENSG00000135119.10,ENSG00000135116.5,ENSG00000174989.8,ENSG00000088992.13,ENSG00000135108.10,ENSG00000089250.14	C12orf49,RNFT2,HRK,FBXW8,TESC,FBXO21,NOS1	23105female:50male:12:107
23105	50	Basal metabolic rate	Standing height	12	111	0.000537664	9.8443e-07	0.000404783	0.000803321	1	0.680368	1	2.53796e-06	0.0228825	ENSG00000170633.12,ENSG00000089094.12,ENSG00000182500.7,ENSG00000139714.8,ENSG00000188735.8,ENSG00000139725.3,ENSG00000139718.6,ENSG00000158104.7,ENSG00000110801.9,ENSG00000256950.2,ENSG00000158023.5,ENSG00000110987.4,ENSG00000175727.9,ENSG00000158113.8,ENSG00000204671.1,ENSG00000176383.8,ENSG00000184047.11,ENSG00000256861.1,ENSG00000139719.5,ENSG00000130779.15,ENSG00000033030.9,ENSG00000111011.1…	RNF34,KDM2B,ORAI1,MORN3,TMEM120B,RHOF,SETD1B,HPD,PSMD9,RP11-87C12.2,WDR66,BCL7A,MLXIP,LRRC43,IL31,B3GNT4,DIABLO,RP11-512M8.5,VPS33A,CLIP1,ZCCHC8,RSRC2,KNTC1,HCAR1,HCAR2,HCAR3,DENR,CCDC62,HIP1R,VPS37B	23105female:50male:12:111
23105	50	Basal metabolic rate	Standing height	12	112	0.000228527	0.0250604	0.00121881	3.74181e-07	1	0.769377	1	2.07015e-05	0.0338278	ENSG00000150967.13,ENSG00000111325.12,ENSG00000182196.9,ENSG00000090975.8,ENSG00000051825.10,ENSG00000130921.3,ENSG00000111328.2,ENSG00000139697.7,ENSG00000183955.8,ENSG00000150977.9,ENSG00000184209.14,ENSG00000188026.7,ENSG00000086598.6,ENSG00000111364.11,ENSG00000111361.8,ENSG00000111358.9,ENSG00000168778.7,ENSG00000185344.9,ENSG00000197653.10,ENSG00000119242.4,ENSG00000250091.2,ENSG00000179195…	ABCB9,OGFOD2,ARL6IP4,PITPNM2,MPHOSPH9,C12orf65,CDK2AP1,SBNO1,SETD8,RILPL2,SNRNP35,RILPL1,TMED2,DDX55,EIF2B1,GTF2H3,TCTN2,ATP6V0A2,DNAH10,CCDC92,DNAH10OS,ZNF664,FAM101A	23105female:50male:12:112
23105	50	Basal metabolic rate	Standing height	13	31	0.00170218	5.9142e-10	0.0020285	8.32296e-06	0.947795	0.809381	1	1.9039e-10	3.87973e-05	ENSG00000123178.10,ENSG00000204977.5,ENSG00000198553.4,ENSG00000176124.7,ENSG00000186047.9,ENSG00000136104.14	SPRYD7,TRIM13,KCNRG,DLEU1,DLEU7,RNASEH2B	23105female:50male:13:31
23105	50	Basal metabolic rate	Standing height	13	91	0.000118143	0	0.000259314	0.00630816	1	0.621362	1	0.000280855	0.0466442	ENSG00000186009.4,ENSG00000185974.6,ENSG00000184497.8,ENSG00000183087.10,ENSG00000185989.9,ENSG00000130177.10,ENSG00000169062.10,ENSG00000198824.4	ATP4B,GRK1,TMEM255B,GAS6,RASA3,CDC16,UPF3A,CHAMP1	23105female:50male:13:91
23105	50	Basal metabolic rate	Standing height	14	4	3.36169e-05	0.749386	0.000419548	0.0822514	1	0.450545	1	0.000174379	0.0422828	ENSG00000259003.1,ENSG00000129562.6,ENSG00000100439.6,ENSG00000255804.1,ENSG00000155463.8,ENSG00000155465.14,ENSG00000215306.1,ENSG00000172590.14,ENSG00000157227.8,ENSG00000197324.4,ENSG00000139890.5,ENSG00000100461.13,ENSG00000100462.11,ENSG00000092036.12,ENSG00000259132.1,ENSG00000129474.11,ENSG00000100802.10,ENSG00000100804.14,ENSG00000222028.2,ENSG00000139880.15,ENSG00000100813.10,ENSG0000017…	AE000662.92,DAD1,ABHD4,OR6J1,OXA1L,SLC7A7,AL135998.1,MRPL52,MMP14,LRP10,REM2,RBM23,PRMT5,HAUS4,RP11-298I3.5,AJUBA,C14orf93,PSMB5,PSMB11,CDH24,ACIN1,C14orf119,CEBPE,SLC7A8,C14orf164,HOMEZ,PPP1R3E,BCL2L2,BCL2L2-PABPN1,PABPN1,AL049829.1,SLC22A17,EFS,IL25,CMTM5,MYH6,MYH7,NGDN	23105female:50male:14:4
23105	50	Basal metabolic rate	Standing height	14	39	0.000615786	0.00744909	0.0010201	0.00737134	1	0.80018	1	2.26647e-05	0.0342858	ENSG00000131951.6,ENSG00000126773.8,ENSG00000100612.9,ENSG00000100614.13,ENSG00000179008.4,ENSG00000184302.6,ENSG00000126778.7,ENSG00000100625.8,ENSG00000020426.6,ENSG00000126814.6,ENSG00000139974.11	LRRC9,PCNXL4,DHRS7,PPM1A,C14orf39,SIX6,SIX1,SIX4,MNAT1,TRMT5,SLC38A6	23105female:50male:14:39
23105	50	Basal metabolic rate	Standing height	14	51	0.000171188	0.0337177	0.00107423	0.0118015	1	0.69577	1	9.15169e-05	0.0387952	ENSG00000140043.7,ENSG00000258653.3,ENSG00000119725.13,ENSG00000156050.4,ENSG00000119723.11,ENSG00000187097.8,ENSG00000119636.11,ENSG00000119711.8,ENSG00000205659.6,ENSG00000119614.2,ENSG00000119688.16,ENSG00000133980.4,ENSG00000183379.4,ENSG00000119655.4,ENSG00000165898.9,ENSG00000119681.7,ENSG00000119682.12,ENSG00000214670.3,ENSG00000119616.7,ENSG00000119596.13,ENSG00000119608.8,ENSG00000119689…	PTGR2,RP5-1021I20.4,ZNF410,FAM161B,COQ6,ENTPD5,CCDC176,ALDH6A1,LIN52,VSX2,ABCD4,VRTN,SYNDIG1L,NPC2,ISCA2,LTBP2,AREL1,AC007956.1,FCF1,YLPM1,PROX2,DLST,RPS6KL1,PGF,EIF2B2,MLH3,ACYP1,ZC2HC1C,NEK9,TMED10	23105female:50male:14:51
23105	50	Basal metabolic rate	Standing height	14	66	0.000141058	0.210731	0.000723565	2.00292e-07	1	0.651965	1	5.28054e-05	0.0372291	ENSG00000165929.8,ENSG00000140092.10,ENSG00000100815.8,ENSG00000066427.17,ENSG00000183648.5,ENSG00000165934.8,ENSG00000140090.13,ENSG00000100599.11,ENSG00000100600.10,ENSG00000066455.8	TC2N,FBLN5,TRIP11,ATXN3,NDUFB1,CPSF2,SLC24A4,RIN3,LGMN,GOLGA5	23105female:50male:14:66
23105	50	Basal metabolic rate	Standing height	15	17	0.000349744	0.000925582	0.000397818	0.00145476	0.939394	0.619762	1	8.88259e-05	0.0387952	ENSG00000188549.8,ENSG00000233041.4,ENSG00000140323.4,ENSG00000128944.9,ENSG00000128928.4,ENSG00000140320.7,ENSG00000169105.6,ENSG00000128891.11,ENSG00000166133.13,ENSG00000137812.15,ENSG00000051180.12,ENSG00000137824.11,ENSG00000137880.4,ENSG00000104129.5,ENSG00000188277.8,ENSG00000166140.13,ENSG00000166143.5,ENSG00000166145.10,ENSG00000104140.6,ENSG00000104142.6,ENSG00000128917.5,ENSG0000012896…	C15orf52,PHGR1,DISP2,KNSTRN,IVD,BAHD1,CHST14,C15orf57,RPUSD2,CASC5,RAD51,RMDN3,GCHFR,DNAJC17,C15orf62,ZFYVE19,PPP1R14D,SPINT1,RHOV,VPS18,DLL4,CHAC1,INO80,EXD1,CHP1,OIP5,NUSAP1,NDUFAF1,RTF1,ITPKA,LTK,RPAP1,TYRO3,MGA,MAPKBP1,AC073657.1,JMJD7,PLA2G4B,JMJD7-PLA2G4B,SPTBN5,EHD4	23105female:50male:15:17
23105	50	Basal metabolic rate	Standing height	15	51	6.48914e-05	0.302161	0.0015516	1.81916e-07	1	0.669567	1	0.000117972	0.0398673	ENSG00000156218.8,ENSG00000259511.1,ENSG00000184206.7,ENSG00000176371.9,ENSG00000177082.8,ENSG00000197696.5,ENSG00000140612.9,ENSG00000166716.5,ENSG00000136383.6	ADAMTSL3,UBE2Q2L,GOLGA6L4,ZSCAN2,WDR73,NMB,SEC11A,ZNF592,ALPK3	23105female:50male:15:51
23105	50	Basal metabolic rate	Standing height	15	65	0.000631462	0.000645262	0.00136489	0.00823074	0.962596	0.691969	1	5.95494e-07	0.015296	ENSG00000185087.7,ENSG00000140443.9,ENSG00000183571.9,ENSG00000182253.10,ENSG00000103852.8,ENSG00000268730.1	FAM169B,IGF1R,PGPEP1L,SYNM,TTC23,AC022819.2	23105female:50male:15:65
23105	50	Basal metabolic rate	Standing height	15	68	0.00011406	0.0519188	0.00132646	4.99871e-09	0.90039	0.511151	1	0.000116521	0.0397901	ENSG00000131873.5,ENSG00000131871.10,ENSG00000131876.12,ENSG00000140479.12,ENSG00000184277.8,ENSG00000185418.11,ENSG00000259658.3,ENSG00000184140.4,ENSG00000182854.5	CHSY1,VIMP,SNRPA1,PCSK6,TM2D3,TARSL2,RP11-89K11.1,OR4F6,OR4F15	23105female:50male:15:68
23105	50	Basal metabolic rate	Standing height	16	3	0.000525184	5.46267e-06	0.000839097	8.89182e-06	1	0.773777	1	3.87109e-07	0.0128879	ENSG00000140990.10,ENSG00000140988.11,ENSG00000179580.5,ENSG00000183751.10,ENSG00000196408.7,ENSG00000269205.1,ENSG00000127554.12,ENSG00000127561.10,ENSG00000167962.8,ENSG00000183971.5,ENSG00000065054.9,ENSG00000065057.3,ENSG00000103197.12,ENSG00000008710.13,ENSG00000167964.8,ENSG00000131653.8,ENSG00000167971.14,ENSG00000167965.13,ENSG00000182685.3,ENSG00000184207.8,ENSG00000167967.11,ENSG0000016…	NDUFB10,RPS2,RNF151,TBL3,NOXO1,AC005606.1,GFER,SYNGR3,ZNF598,NPW,SLC9A3R2,NTHL1,TSC2,PKD1,RAB26,TRAF7,CASKIN1,MLST8,BRICD5,PGP,E4F1,DNASE1L2,ECI1,RNPS1,AC009065.1,ABCA3,CCNF,C16orf59,NTN3,TBC1D24,RP11-20I23.1,ATP6V0C,ATP6C,AMDHD2,CEMP1,PDPK1,KCTD5,PRSS27,SRRM2,TCEB2,PRSS33,PRSS21,ZG16B,PRSS22,FLYWCH2,FLYWCH1,KREMEN2,PKMYT1,PAQR4,CLDN9,CLDN6,TNFRSF12A,HCFC1R1,THOC6,CCDC64B,MMP25,IL32,ZSCAN10,ZNF20…	23105female:50male:16:3
23105	50	Basal metabolic rate	Standing height	16	17	0.000153027	0.399542	0.000891251	6.13693e-06	1	0.635764	1	0.000178245	0.0424564	ENSG00000175595.10,ENSG00000186260.12,ENSG00000140694.12,ENSG00000269049.1,ENSG00000103429.6,ENSG00000069764.5,ENSG00000224712.6,ENSG00000254852.4,ENSG00000103512.10,ENSG00000183426.11,ENSG00000179889.14,ENSG00000157045.4,ENSG00000085721.8,ENSG00000183793.9,ENSG00000156968.8,ENSG00000261130.1,ENSG00000166780.6,ENSG00000166783.15,ENSG00000072864.8	ERCC4,MKL2,PARN,AC092291.2,BFAR,PLA2G10,NPIPA3,NPIPA2,NOMO1,NPIPA1,PDXDC1,NTAN1,RRN3,NPIPA5,MPV17L,RP11-1021N1.1,C16orf45,KIAA0430,NDE1	23105female:50male:16:17
23105	50	Basal metabolic rate	Standing height	16	65	0.000250877	0.0948121	0.000841328	0.00129915	0.989599	0.690369	1	2.28895e-06	0.0220017	ENSG00000140950.11,ENSG00000103187.6,ENSG00000135686.8,ENSG00000103194.11,ENSG00000103196.7,ENSG00000153786.8,ENSG00000135709.8,ENSG00000153789.8	TLDC1,COTL1,KLHL36,USP10,CRISPLD2,ZDHHC7,KIAA0513,FAM92B	23105female:50male:16:65
23105	50	Basal metabolic rate	Standing height	16	70	0.00020245	0.00845228	0.00065271	0.00789582	1	0.747175	1	1.12883e-05	0.0327302	ENSG00000225614.2,ENSG00000179588.4,ENSG00000158545.11,ENSG00000124391.4,ENSG00000051523.6,ENSG00000167508.6,ENSG00000185669.5,ENSG00000158717.6,ENSG00000174177.8,ENSG00000103335.15,ENSG00000167513.4,ENSG00000198931.6,ENSG00000141012.8,ENSG00000269422.1,ENSG00000167515.6,ENSG00000205022.5,ENSG00000129993.10,ENSG00000205018.2	ZNF469,ZFPM1,ZC3H18,IL17C,CYBA,MVD,SNAI3,RNF166,CTU2,PIEZO1,CDT1,APRT,GALNS,AC092384.1,TRAPPC2L,PABPN1L,CBFA2T3,RP11-830F9.6	23105female:50male:16:70
23105	50	Basal metabolic rate	Standing height	17	8	0.000268622	0.0257562	0.000281049	0.0666269	0.984998	0.560956	1	0.000229868	0.044671	ENSG00000129195.11,ENSG00000091622.11,ENSG00000198920.5,ENSG00000129235.6,ENSG00000108590.6,ENSG00000212734.4,ENSG00000141485.11,ENSG00000132530.12,ENSG00000177294.6,ENSG00000167858.8,ENSG00000215067.5,ENSG00000108839.7,ENSG00000219200.6,ENSG00000269871.1,ENSG00000161939.14,ENSG00000258315.1,ENSG00000161940.6,ENSG00000174327.6,ENSG00000174326.7,ENSG00000132514.9,ENSG00000161944.12,ENSG00000141505…	FAM64A,PITPNM3,KIAA0753,TXNDC17,MED31,C17orf100,SLC13A5,XAF1,FBXO39,TEKT1,AC027763.2,ALOX12,RNASEK,AC040977.1,RNASEK-C17orf49,C17orf49,BCL6B,SLC16A13,SLC16A11,CLEC10A,ASGR2,ASGR1,DLG4,ACADVL,DVL2,PHF23,GABARAP,CTD-2545G14.7,CTDNEP1,RP1-4G17.5,ELP5,CLDN7,SLC2A4,YBX2,EIF5A,GPS2,RP11-542C16.2,NEURL4,ACAP1,KCTD11	23105female:50male:17:8
23105	50	Basal metabolic rate	Standing height	17	9	0.000316103	0.0832109	0.00197199	2.36643e-06	0.941194	0.577958	1	6.5449e-05	0.0381041	ENSG00000174292.8,ENSG00000187838.12,ENSG00000262481.1,ENSG00000205544.3,ENSG00000169992.5,ENSG00000181323.7,ENSG00000184560.3,ENSG00000181284.2,ENSG00000161958.6,ENSG00000170175.6,ENSG00000174282.7,ENSG00000259224.1,ENSG00000181222.10,ENSG00000239697.6,ENSG00000248871.1,ENSG00000161955.12,ENSG00000161956.8,ENSG00000161960.10,ENSG00000129226.9,ENSG00000129255.10,ENSG00000129194.3,ENSG00000129245.…	TNK1,TMEM256-PLSCR3,C17orf61-PLSCR3,TMEM256,NLGN2,SPEM1,C17orf74,TMEM102,FGF11,CHRNB1,ZBTB4,SLC35G6,POLR2A,TNFSF12,TNFSF12-TNFSF13,TNFSF13,SENP3,EIF4A1,CD68,MPDU1,SOX15,FXR2,AC007421.1,SHBG,SAT2,ATP1B2,TP53,WRAP53,EFNB3,DNAH2,KDM6B,TMEM88,LSMD1,CYB5D1,CHD3,KCNAB3,RP11-1099M24.7,TRAPPC1,CNTROB,GUCY2D,ALOX15B,ALOX12B,AC129492.6,ALOXE3,HES7,PER1,RP11-599B13.6,VAMP2,TMEM107,C17orf59,AURKB,CTC1,PFAS,S…	23105female:50male:17:9
23105	50	Basal metabolic rate	Standing height	17	47	0.000590361	0.00235908	0.00168012	0.000163877	1	0.823182	1	2.72416e-06	0.0233245	ENSG00000087995.11,ENSG00000146872.13,ENSG00000011028.9,ENSG00000173838.7,ENSG00000170921.10,ENSG00000008283.11,ENSG00000159640.10,ENSG00000264813.1,ENSG00000173826.10,ENSG00000136485.10,ENSG00000136463.7,ENSG00000198909.3,ENSG00000136490.4,ENSG00000266173.1,ENSG00000125695.12,ENSG00000108588.9,ENSG00000198231.8,ENSG00000108592.12,ENSG00000087191.8,ENSG00000108604.11,ENSG00000213218.5,ENSG0000013…	METTL2A,TLK2,MRC2,MARCH10,TANC2,CYB561,ACE,ACE,KCNH6,DCAF7,TACO1,MAP3K3,LIMD2,STRADA,RP11-51F16.8,CCDC47,DDX42,FTSJ3,PSMC5,SMARCD2,CSH2,GH2,CSH1,CSHL1,GH1,CD79B,SCN4A,C17orf72,ICAM2	23105female:50male:17:47
23105	50	Basal metabolic rate	Standing height	17	52	0.000443654	0.00171156	0.00144884	2.51082e-07	0.828983	0.582558	0.959996	1.45058e-06	0.019746	ENSG00000141338.9,ENSG00000154258.12,ENSG00000154262.8,ENSG00000154263.13,ENSG00000154265.11,ENSG00000108984.9,ENSG00000153822.9,ENSG00000123700.4	ABCA8,ABCA9,ABCA6,ABCA10,ABCA5,MAP2K6,KCNJ16,KCNJ2	23105female:50male:17:52
23105	50	Basal metabolic rate	Standing height	18	18	0.000933916	6.89532e-06	0.00213948	8.83019e-08	0.851385	0.576758	0.960596	2.00297e-05	0.0338102	ENSG00000101773.12,ENSG00000134508.8,ENSG00000134490.9,ENSG00000101782.10,ENSG00000141452.5,ENSG00000141458.8,ENSG00000154065.12,ENSG00000053747.11	RBBP8,CABLES1,TMEM241,RIOK3,C18orf8,NPC1,ANKRD29,LAMA3	23105female:50male:18:18
23105	50	Basal metabolic rate	Standing height	18	37	0.00068535	1.10341e-05	0.000576452	0.0081074	0.89639	0.537154	1	3.73883e-05	0.0361699	ENSG00000268960.1,ENSG00000134030.9,ENSG00000101665.4	AC091150.1,CTIF,SMAD7	23105female:50male:18:37
23105	50	Basal metabolic rate	Standing height	19	4	0.000177805	0.198056	0.000160457	0.76648	1	0.567357	1	0.000208732	0.0437892	ENSG00000104904.8,ENSG00000188305.4,ENSG00000220008.2,ENSG00000130332.10,ENSG00000178297.8,ENSG00000099800.3,ENSG00000176619.6,ENSG00000099860.4,ENSG00000176533.8,ENSG00000176490.4,ENSG00000267001.1,ENSG00000141873.6,ENSG00000104969.5,ENSG00000172009.10,ENSG00000172006.7,ENSG00000186300.7,ENSG00000172000.3,ENSG00000171970.8,ENSG00000175691.8,ENSG00000104953.14,ENSG00000065717.10,ENSG00000104964.10	OAZ1,C19orf35,LINGO3,LSM7,TMPRSS9,TIMM13,LMNB2,GADD45B,GNG7,DIRAS1,AC006538.4,SLC39A3,SGTA,THOP1,ZNF554,ZNF555,ZNF556,ZNF57,ZNF77,TLE6,TLE2,AES	23105female:50male:19:4
23105	50	Basal metabolic rate	Standing height	19	9	0.00044329	0.000253205	0.000842517	0	0.864786	0.50055	1	5.63883e-05	0.0375025	ENSG00000130545.11,ENSG00000205744.5,ENSG00000104833.6,ENSG00000125657.3,ENSG00000125726.6,ENSG00000125735.6,ENSG00000125730.12,ENSG00000125734.9,ENSG00000125733.13,ENSG00000125731.8,ENSG00000141968.3,ENSG00000174837.10,ENSG00000204752.3,ENSG00000237247.4,ENSG00000205718.4,ENSG00000230522.3,ENSG00000182315.4,ENSG00000130544.7	CRB3,DENND1C,TUBB4A,TNFSF9,CD70,TNFSF14,C3,GPR108,TRIP10,SH2D3A,VAV1,EMR1,AC025278.1,MBD3L5,MBD3L4,MBD3L2,MBD3L3,ZNF557	23105female:50male:19:9
23105	50	Basal metabolic rate	Standing height	19	45	0.000135672	0.310214	0.00040702	0.00059714	1	0.612161	1	0.000241887	0.0451585	ENSG00000124466.8,ENSG00000176531.6,ENSG00000105755.3,ENSG00000176472.6,ENSG00000073050.7,ENSG00000268361.1,ENSG00000234465.6,ENSG00000167378.4,ENSG00000124444.11,ENSG00000226763.3,ENSG00000131116.7,ENSG00000105767.2,ENSG00000011422.7,ENSG00000124449.6,ENSG00000105771.9,ENSG00000104783.7,ENSG00000159871.10,ENSG00000167637.12,ENSG00000176222.7,ENSG00000124459.7,ENSG00000159905.10,ENSG00000204920.6…	LYPD3,PHLDB3,ETHE1,ZNF575,XRCC1,L34079.2,PINLYP,IRGQ,ZNF576,SRRM5,ZNF428,CADM4,PLAUR,IRGC,SMG9,KCNN4,LYPD5,ZNF283,ZNF404,ZNF45,ZNF221,ZNF155,ZNF230,ZNF222,ZNF223,ZNF223,ZNF284,ZNF224,ZNF225,ZNF234,ZNF226,ZNF227,ZNF235,ZNF233,ZNF112,CTC-512J12.6,ZNF285,ZNF229,ZNF180	23105female:50male:19:45
23105	50	Basal metabolic rate	Standing height	20	8	0.000294925	0.011893	0.00271593	1.56717e-12	0.869387	0.49615	1	0.000129502	0.0405803	ENSG00000125845.6	BMP2	23105female:50male:20:8
23105	50	Basal metabolic rate	Standing height	20	23	0.000409236	0.000462336	0.000914041	9.68243e-07	0.833383	0.511551	0.9968	4.52279e-05	0.0365732	ENSG00000173418.7,ENSG00000101343.10,ENSG00000089101.13,ENSG00000173404.3,ENSG00000188559.9,ENSG00000088930.6,ENSG00000125816.4,ENSG00000125820.5	NAA20,CRNKL1,C20orf26,INSM1,RALGAPA2,XRN2,NKX2-4,NKX2-2	23105female:50male:20:23
23105	50	Basal metabolic rate	Standing height	20	30	0.000815478	4.1311e-07	0.0010144	5.39437e-06	0.958796	0.765577	1	8.58182e-08	0.00416377	ENSG00000101331.11,ENSG00000101336.8,ENSG00000101337.11,ENSG00000126003.6,ENSG00000101346.7,ENSG00000101350.6,ENSG00000171456.12,ENSG00000197183.8,ENSG00000204393.3,ENSG00000149600.7,ENSG00000088305.14,ENSG00000101367.8,ENSG00000215529.8,ENSG00000167098.7,ENSG00000078898.6,ENSG00000167104.7,ENSG00000186190.7,ENSG00000186191.7,ENSG00000131050.6,ENSG00000131059.7,ENSG00000269117.1,ENSG00000198183.7…	CCM2L,HCK,TM9SF4,PLAGL2,POFUT1,KIF3B,ASXL1,C20orf112,RP11-410N8.4,COMMD7,DNMT3B,MAPRE1,EFCAB8,SUN5,BPIFB2,BPIFB6,BPIFB3,BPIFB4,BPIFA2,BPIFA3,AL121901.1,BPIFA1,BPIFB1,CDK5RAP1,SNTA1,CBFA2T2,NECAB3,C20orf144,ACTL10,E2F1,PXMP4,ZNF341,CHMP4B	23105female:50male:20:30
23105	50	Basal metabolic rate	Standing height	20	32	0.000958638	2.23694e-05	0.00372037	1.89841e-09	1	0.925393	1	3.30951e-09	0.000421503	ENSG00000101019.17,ENSG00000204183.1,ENSG00000125965.4,ENSG00000126001.11,ENSG00000125975.9,ENSG00000125991.14,ENSG00000061656.5,ENSG00000214078.7,ENSG00000272897.1,ENSG00000244462.3,ENSG00000244005.8,ENSG00000125995.11,ENSG00000131051.16,ENSG00000025293.11,ENSG00000171222.6,ENSG00000149646.8,ENSG00000088367.16,ENSG00000269650.1,ENSG00000131043.7,ENSG00000080845.13,ENSG00000101335.5,ENSG000001187…	UQCC1,GDF5OS,GDF5,CEP250,C20orf173,ERGIC3,SPAG4,CPNE1,RP1-309K20.6,RBM12,NFS1,ROMO1,RBM39,PHF20,SCAND1,CNBD2,EPB41L1,AL121895.1,AAR2,DLGAP4,MYL9,TGIF2,TGIF2-C20orf24,C20orf24,SLA2,NDRG3,DSN1,SOGA1,TLDC2,SAMHD1,RBL1,RBL1,MROH8,RPN2,GHRH,MANBAL	23105female:50male:20:32
23105	50	Basal metabolic rate	Standing height	20	43	0.00010486	0.0587173	0.000573478	6.24819e-06	1	0.671767	1	0.000254298	0.0455044	ENSG00000124126.9,ENSG00000124198.8,ENSG00000124207.12,ENSG00000124214.15,ENSG00000124228.10,ENSG00000124201.10,ENSG00000158445.7,ENSG00000124212.5	PREX1,ARFGEF2,CSE1L,STAU1,DDX27,ZNFX1,KCNB1,PTGIS	23105female:50male:20:43
23105	924	Basal metabolic rate	Usual walking pace	3	79	4.66328e-05	0.294814	8.22082e-05	0	-1	-1	-0.287329	0.000291639	0.0471544	ENSG00000044524.6	EPHA3	23105female:924male:3:79
23105	924	Basal metabolic rate	Usual walking pace	4	78	5.16934e-05	0.245399	0.000156379	0.01628	-1	-1	-0.477748	7.00566e-06	0.0292541	ENSG00000156269.4,ENSG00000196475.4,ENSG00000163297.12,ENSG00000152784.11	NAA11,GK2,ANTXR2,PRDM8	23105female:924male:4:78
23105	924	Basal metabolic rate	Usual walking pace	5	80	0.000599712	1.74341e-06	1.51524e-05	0.87463	-1	-1	-0.470147	3.21803e-05	0.035163	ENSG00000236882.3,ENSG00000118985.10,ENSG00000175426.6,ENSG00000153113.19,ENSG00000164307.8,ENSG00000247121.2,ENSG00000164308.12,ENSG00000113441.11	C5orf27,ELL2,PCSK1,CAST,ERAP1,CTD-2260A17.2,ERAP2,LNPEP	23105female:924male:5:80
23105	924	Basal metabolic rate	Usual walking pace	7	11	0.000186067	0.000629468	8.72056e-05	0.143833	1	0.454145	1	2.45012e-05	0.0344835	ENSG00000106415.8,ENSG00000003147.13	GLCCI1,ICA1	23105female:924male:7:11
23105	924	Basal metabolic rate	Usual walking pace	7	23	3.69309e-05	0.622249	0.000141065	0.0228436	-1	-1	-0.254125	1.76107e-05	0.0331133	ENSG00000106537.7,ENSG00000267906.1,ENSG00000106541.7,ENSG00000173467.4,ENSG00000106546.8	TSPAN13,AC073333.1,AGR2,AGR3,AHR	23105female:924male:7:23
23105	924	Basal metabolic rate	Usual walking pace	8	15	7.91055e-05	0.0231541	2.46083e-05	0.169254	-1	-1	-0.266927	2.82684e-05	0.035163	ENSG00000182319.5,ENSG00000253958.1	SGK223,CLDN23	23105female:924male:8:15
23105	924	Basal metabolic rate	Usual walking pace	14	26	8.62023e-05	0.0657902	9.86037e-05	0.138091	-1	-1	-0.272927	3.02684e-05	0.035163	ENSG00000165496.3,ENSG00000139915.14,ENSG00000272781.1	RPL10L,MDGA2,MDGA2	23105female:924male:14:26
23105	924	Basal metabolic rate	Usual walking pace	19	31	0.000493632	0	0.000209257	0.0540469	-0.873187	-1	-0.477948	0.000343263	0.0494601	ENSG00000169021.4,ENSG00000187135.7,ENSG00000105171.5,ENSG00000166289.5,ENSG00000131943.13,ENSG00000105173.9	UQCRFS1,VSTM2B,POP4,PLEKHF1,C19orf12,CCNE1	23105female:924male:19:31
23105	I9_CHD	Basal metabolic rate	Major coronary heart disease event	2	120	0.000209849	0.0636434	2.20872e-05	0.751755	1	0.0331033	1	8.85468e-05	0.0387952	ENSG00000186684.8,ENSG00000163161.8,ENSG00000169967.12,ENSG00000115718.13,ENSG00000163166.9,ENSG00000169994.14,ENSG00000072163.14,ENSG00000144230.12,ENSG00000136709.7,ENSG00000173349.4,ENSG00000144231.6,ENSG00000144233.5,ENSG00000136715.13,ENSG00000136731.8,ENSG00000136720.6	CYP27C1,ERCC3,MAP3K2,PROC,IWS1,MYO7B,LIMS2,GPR17,WDR33,SFT2D3,POLR2D,AMMECR1L,SAP130,UGGT1,HS6ST1	23105female:I9_CHDmale:2:120
23105	I9_CHD	Basal metabolic rate	Major coronary heart disease event	2	184	7.72212e-05	0.0302341	3.25417e-05	0.124299	-1	-1	-0.0337034	0.000117126	0.0397901	ENSG00000114933.11,ENSG00000023228.9,ENSG00000114942.9,ENSG00000183671.8,ENSG00000204186.3,ENSG00000269633.1,ENSG00000114948.8,ENSG00000232125.2,ENSG00000138400.8,ENSG00000118246.9	INO80D,NDUFS1,EEF1B2,GPR1,ZDBF2,AC017081.1,ADAM23,DYTN,MDH1B,FASTKD2	23105female:I9_CHDmale:2:184
23105	I9_CHD	Basal metabolic rate	Major coronary heart disease event	5	93	3.79025e-05	0.118955	2.7031e-05	0.338242	-1	-1	-0.0257026	0.000176611	0.0423525	ENSG00000186952.10,ENSG00000164209.12,ENSG00000145777.10,ENSG00000134987.7	TMEM232,SLC25A46,TSLP,WDR36	23105female:I9_CHDmale:5:93
23105	II_NEOPLASM	Basal metabolic rate	Neoplasms	1	27	0.000214012	0	7.84763e-05	0.0795806	-1	-1	-0.375938	0.000145702	0.0411057	ENSG00000117643.10,ENSG00000162430.12,ENSG00000255054.3,ENSG00000117640.13,ENSG00000223474.2,ENSG00000127423.6,ENSG00000182749.5,ENSG00000117632.16,ENSG00000158006.9,ENSG00000158008.5,ENSG00000158014.10,ENSG00000158022.6,ENSG00000175087.5,ENSG00000197245.4,ENSG00000142684.7,ENSG00000142675.13,ENSG00000188782.3,ENSG00000130695.9,ENSG00000142669.9,ENSG00000158062.16,ENSG00000169442.4,ENSG0000017609…	MAN1C1,SEPN1,RP1-317E23.6,MTFR1L,AL020996.1,AUNIP,PAQR7,STMN1,PAFAH2,EXTL1,SLC30A2,TRIM63,PDIK1L,FAM110D,ZNF593,CNKSR1,CATSPER4,CEP85,SH3BGRL3,UBXN11,CD52,AIM1L,ZNF683,LIN28A,DHDDS,HMGN2,RPS6KA1,ARID1A,PIGV,ZDHHC18,SFN,GPN2,GPATCH3,NUDC,NR0B2,C1orf172,TRNP1,FAM46B,SLC9A1,WDTC1,TMEM222,SYTL1,MAP3K6,FCN3,CD164L2,GPR3,WASF2,AHDC1,FGR	23105female:II_NEOPLASMmale:1:27
23105	II_NEOPLASM	Basal metabolic rate	Neoplasms	2	111	6.80892e-05	0.299287	1.93353e-05	0.696246	1	0.0919092	1	3.46368e-05	0.0354527	ENSG00000125633.6,ENSG00000125629.10,ENSG00000163064.6	CCDC93,INSIG2,EN1	23105female:II_NEOPLASMmale:2:111
23105	20002_1223	Basal metabolic rate	Type 2 diabetes	9	69	4.7779e-05	0.299108	9.71846e-05	0.041129	-1	-1	-0.0267027	0.000103877	0.0390615	ENSG00000165025.10,ENSG00000148090.7	SYK,AUH	23105female:20002_1223male:9:69
23105	20002_1223	Basal metabolic rate	Type 2 diabetes	14	71	0.000158296	0.0138714	8.38211e-06	0.854985	1	0.0605061	1	0.000213265	0.0438967	ENSG00000246223.4	C14orf64	23105female:20002_1223male:14:71
23105	20002_1286	Basal metabolic rate	Depression	5	133	0.000173139	0	4.56992e-05	0.494973	-1	-1	-0.338534	6.88308e-05	0.0383365	ENSG00000113282.9	CLINT1	23105female:20002_1286male:5:133
23105	20002_1286	Basal metabolic rate	Depression	18	32	0.000148879	0.00131395	1.56441e-05	0.593132	1	0.0349035	1	7.7666e-05	0.0387669	ENSG00000078142.7	PIK3C3	23105female:20002_1286male:18:32
23105	20002_1291	Basal metabolic rate	Mania/Bipolar disorder	1	29	8.94962e-05	0.144759	3.28111e-05	0.487451	-1	-1	-0.29613	3.89054e-05	0.0362489	ENSG00000159023.14,ENSG00000253304.1,ENSG00000116350.11,ENSG00000116353.11,ENSG00000060656.15	EPB41,TMEM200B,SRSF4,MECR,PTPRU	23105female:20002_1291male:1:29
23105	20002_1291	Basal metabolic rate	Mania/Bipolar disorder	5	118	0.000100231	0.00880582	6.81268e-05	0.00907717	-1	-1	-0.317732	2.0845e-05	0.0338278	ENSG00000185129.4,ENSG00000182700.3,ENSG00000120306.5,ENSG00000113068.5,ENSG00000113070.6,ENSG00000113073.10,ENSG00000131503.16,ENSG00000254996.1,ENSG00000213523.5,ENSG00000243056.1,ENSG00000113108.13,ENSG00000176087.10,ENSG00000170458.9,ENSG00000131495.4,ENSG00000113119.8,ENSG00000113141.11,ENSG00000120314.14,ENSG00000256453.1,ENSG00000170445.8,ENSG00000112855.10,ENSG00000146007.6,ENSG0000020497…	PURA,IGIP,CYSTM1,PFDN1,HBEGF,SLC4A9,ANKHD1,ANKHD1-EIF4EBP3,SRA1,EIF4EBP3,APBB3,SLC35A4,CD14,NDUFA2,TMCO6,IK,WDR55,DND1,HARS,HARS2,ZMAT2,PCDHA1,PCDHA2,PCDHA3,PCDHA4,PCDHA5,PCDHA6,PCDHA7,PCDHA8,PCDHA9,PCDHA10,AC005609.1,PCDHA11,PCDHA12,PCDHA13,PCDHAC1,PCDHAC2,PCDHB1,PCDHB2,PCDHB3,PCDHB4,PCDHB5,PCDHB6,PCDHB17,PCDHB7,PCDHB8,PCDHB16,PCDHB10,PCDHB11,PCDHB12,PCDHB13,PCDHB14,PCDHB15,SLC25A2,TAF7,PCDHGA1,…	23105female:20002_1291male:5:118
23105	20002_1291	Basal metabolic rate	Mania/Bipolar disorder	13	2	6.27876e-05	0.138441	3.00898e-05	0	-1	-1	-0.0137014	0.000146395	0.0411057	ENSG00000198033.7,ENSG00000121388.4,ENSG00000132958.13,ENSG00000196199.9,ENSG00000121390.13,ENSG00000269591.1,ENSG00000132950.14	TUBA3C,RP11-408E5.4,TPTE2,MPHOSPH8,PSPC1,AL354808.2,ZMYM5	23105female:20002_1291male:13:2
3526	50	Mother's age at death	Standing height	5	99	7.53994e-05	0.230563	0.000110158	0.052086	1	0.418942	1	0.000315667	0.0482709			3526female:50male:5:99
3526	50	Mother's age at death	Standing height	6	16	0.000113614	0.265121	0.00023293	0.0517743	-1	-1	-0.673767	0.000279655	0.0466442	ENSG00000124795.10,ENSG00000137393.8	DEK,RNF144B	3526female:50male:6:16
3526	50	Mother's age at death	Standing height	14	22	8.862e-05	0.360803	8.92658e-05	0.111584	1	0.263726	1	6.72245e-06	0.0286587			3526female:50male:14:22
3526	924	Mother's age at death	Usual walking pace	8	66	4.97206e-05	0	3.88144e-05	0.0530812	1	0.110511	1	7.80583e-05	0.0387669	ENSG00000178538.5	CA8	3526female:924male:8:66
3526	924	Mother's age at death	Usual walking pace	13	62	2.86268e-05	0.710786	0.000129858	0.0626106	1	0.459746	1	0.000223509	0.0443637			3526female:924male:13:62
3526	II_NEOPLASM	Mother's age at death	Neoplasms	8	28	8.68757e-05	0.377796	4.74647e-05	0.359208	1	0.250325	1	8.50659e-06	0.0306212	ENSG00000078579.8,ENSG00000155970.7	FGF20,MICU3	3526female:II_NEOPLASMmale:8:28
3526	20002_1223	Mother's age at death	Type 2 diabetes	13	84	7.80922e-05	0.492894	7.37237e-05	0.188507	1	0.156916	1	0.000208449	0.0437892	ENSG00000174405.9,ENSG00000139826.5,ENSG00000102524.7	LIG4,ABHD13,TNFSF13B	3526female:20002_1223male:13:84
50	924	Standing height	Usual walking pace	3	35	2.27053e-05	0.679267	5.58549e-05	0.167135	1	0.0541054	1	1.20132e-05	0.0328404	ENSG00000172995.12	ARPP21	50female:924male:3:35
50	924	Standing height	Usual walking pace	5	80	0.000731406	0.000448439	1.51524e-05	0.87463	-1	-1	-0.29673	0.00021252	0.0438848	ENSG00000236882.3,ENSG00000118985.10,ENSG00000175426.6,ENSG00000153113.19,ENSG00000164307.8,ENSG00000247121.2,ENSG00000164308.12,ENSG00000113441.11	C5orf27,ELL2,PCSK1,CAST,ERAP1,CTD-2260A17.2,ERAP2,LNPEP	50female:924male:5:80
50	924	Standing height	Usual walking pace	6	46	0.000162572	0.132613	0.000144196	0.0504577	1	0.663166	1	0.000131304	0.0405803	ENSG00000244067.1,ENSG00000243955.1,ENSG00000182793.6,ENSG00000174156.9,ENSG00000170899.6,ENSG00000112144.11,ENSG00000112146.12,ENSG00000137270.10,ENSG00000012660.9	GSTA2,GSTA1,GSTA5,GSTA3,GSTA4,ICK,FBXO9,GCM1,ELOVL5	50female:924male:6:46
50	924	Standing height	Usual walking pace	8	20	0.000164669	0.0130961	1.02496e-05	0.615088	1	0.0443044	1	3.8003e-05	0.0362489	ENSG00000136574.13,ENSG00000255394.2,ENSG00000154328.11,ENSG00000079459.8,ENSG00000255046.1,ENSG00000164733.16,ENSG00000205884.2,ENSG00000205883.2,ENSG00000205882.4,ENSG00000255098.1	GATA4,C8orf49,NEIL2,FDFT1,RP11-297N6.4,CTSB,DEFB136,DEFB135,DEFB134,RP11-481A20.11	50female:924male:8:20
50	924	Standing height	Usual walking pace	8	48	7.84325e-05	0.206878	0.000134956	0.00405939	1	0.59916	1	0.000210009	0.0437892	ENSG00000156687.6,ENSG00000233863.1	UNC5D,AC012215.1	50female:924male:8:48
50	924	Standing height	Usual walking pace	9	102	0.000186614	0.00144572	4.10254e-05	0.138939	1	0.0491049	1	0.000331195	0.048984	ENSG00000180264.6,ENSG00000136931.5,ENSG00000148200.12,ENSG00000185585.15,ENSG00000136918.3,ENSG00000136942.10,ENSG00000136950.9,ENSG00000136935.9,ENSG00000173611.13,ENSG00000119414.7,ENSG00000136933.12,ENSG00000044574.7,ENSG00000165219.17,ENSG00000119487.12,ENSG00000167081.12	GPR144,NR5A1,NR6A1,OLFML2A,WDR38,RPL35,ARPC5L,GOLGA1,SCAI,PPP6C,RABEPK,HSPA5,GAPVD1,MAPKAP1,PBX3	50female:924male:9:102
50	924	Standing height	Usual walking pace	18	14	0.000452872	3.27176e-06	5.99972e-05	0.207293	1	0.40494	1	1.59997e-05	0.0328404	ENSG00000175354.14,ENSG00000085415.11,ENSG00000101639.14	PTPN2,SEH1L,CEP192	50female:924male:18:14
50	I9_CHD	Standing height	Major coronary heart disease event	1	35	0.000529149	2.12039e-05	6.47114e-05	0.357592	-1	-1	-0.520352	1.36801e-06	0.0196317	ENSG00000116885.14,ENSG00000116898.7,ENSG00000119535.13,ENSG00000163873.5,ENSG00000163874.8,ENSG00000163875.11,ENSG00000163877.9,ENSG00000163879.9,ENSG00000134697.8,ENSG00000169218.9,ENSG00000116922.10,ENSG00000134690.6,ENSG00000183317.12,ENSG00000185090.10,ENSG00000196449.3,ENSG00000197982.12,ENSG00000188786.9,ENSG00000230610.1,ENSG00000204084.8,ENSG00000183431.7	OSCP1,MRPS15,CSF3R,GRIK3,ZC3H12A,MEAF6,SNIP1,DNALI1,GNL2,RSPO1,C1orf109,CDCA8,EPHA10,MANEAL,YRDC,C1orf122,MTF1,AL929472.1,INPP5B,SF3A3	50female:I9_CHDmale:1:35
50	I9_CHD	Standing height	Major coronary heart disease event	4	22	0.00268568	1.1087e-11	2.2911e-05	0.696433	-1	-1	-0.556356	0.000179678	0.0424803	ENSG00000151552.7,ENSG00000249581.2,ENSG00000002549.8,ENSG00000118579.7,ENSG00000047662.4,ENSG00000163257.6,ENSG00000109805.5,ENSG00000178177.10	QDPR,CLRN2,LAP3,MED28,FAM184B,DCAF16,NCAPG,LCORL	50female:I9_CHDmale:4:22
50	20002_1223	Standing height	Type 2 diabetes	13	61	5.60197e-05	0.155164	5.88147e-05	0.24965	-1	-1	-0.257926	0.000147889	0.0411751	ENSG00000178235.6	SLITRK1	50female:20002_1223male:13:61
50	20002_1223	Standing height	Type 2 diabetes	20	18	4.05804e-05	0.328315	4.38483e-05	0.306359	1	0.19832	1	0.000224669	0.0444725	ENSG00000089177.13	KIF16B	50female:20002_1223male:20:18
50	20002_1286	Standing height	Depression	4	154	7.20725e-05	0.049498	1.54331e-05	0.751704	1	0.179918	1	5.56694e-05	0.0375025	ENSG00000038295.3	TLL1	50female:20002_1286male:4:154
50	20002_1286	Standing height	Depression	6	152	2.32224e-05	0.669562	6.93092e-05	0.182002	1	0.0649065	1	5.82581e-06	0.0277375	ENSG00000184465.11,ENSG00000185127.5,ENSG00000130024.10,ENSG00000184786.4,ENSG00000130023.11,ENSG00000198719.7,ENSG00000112584.9,ENSG00000008018.8,ENSG00000112592.8,ENSG00000071994.6	WDR27,C6orf120,PHF10,TCTE3,ERMARD,DLL1,FAM120B,PSMB1,TBP,PDCD2	50female:20002_1286male:6:152
50	20002_1286	Standing height	Depression	8	90	3.0543e-05	0.230533	2.99539e-05	0.182098	1	0.0753075	1	6.1995e-05	0.0378636			50female:20002_1286male:8:90
50	20002_1291	Standing height	Mania/Bipolar disorder	2	66	0.000140053	0.0123697	4.01517e-05	0.137247	-1	-1	-0.272527	8.44979e-05	0.0387952	ENSG00000028116.12,ENSG00000115392.7	VRK2,FANCL	50female:20002_1291male:2:66
50	20002_1291	Standing height	Mania/Bipolar disorder	3	40	0.000295761	0.000362207	1.93479e-05	0.616165	1	0.277328	1	7.09626e-05	0.0383858	ENSG00000168036.12,ENSG00000168038.6,ENSG00000182606.10	CTNNB1,ULK4,TRAK1	50female:20002_1291male:3:40
50	20002_1291	Standing height	Mania/Bipolar disorder	3	148	3.75446e-05	0.556749	2.2246e-05	0.60192	-1	-1	-0.154715	0.000190153	0.0428134	ENSG00000169064.8	ZBBX	50female:20002_1291male:3:148
924	I9_CHD	Usual walking pace	Major coronary heart disease event	1	161	2.67299e-05	0.422991	0.000102609	0	-1	-1	-0.414341	3.43681e-06	0.0251331	ENSG00000008118.5,ENSG00000196878.8,ENSG00000123689.5,ENSG00000117594.5,ENSG00000009790.10,ENSG00000162757.3,ENSG00000117595.6,ENSG00000117597.13,ENSG00000143469.12,ENSG00000082497.7,ENSG00000054392.8	CAMK1G,LAMB3,G0S2,HSD11B1,TRAF3IP3,C1orf74,IRF6,DIEXF,SYT14,SERTAD4,HHAT	924female:I9_CHDmale:1:161
924	II_NEOPLASM	Usual walking pace	Neoplasms	3	152	5.35691e-05	0.20421	6.26643e-05	0.524249	1	0.290729	1	5.94865e-05	0.0376194	ENSG00000075651.11,ENSG00000183657.2,ENSG00000186329.5	PLD1,PP13439,TMEM212	924female:II_NEOPLASMmale:3:152
924	20002_1223	Usual walking pace	Type 2 diabetes	14	38	4.87917e-05	0.406165	4.24072e-05	0.385226	-1	-1	-0.20472	2.90239e-05	0.035163	ENSG00000100592.11,ENSG00000181619.11,ENSG00000126790.7,ENSG00000050130.13,ENSG00000151838.7	DAAM1,GPR135,L3HYPDH,JKAMP,CCDC175	924female:20002_1223male:14:38
924	20002_1286	Usual walking pace	Depression	11	117	8.82218e-05	0.427157	7.15121e-05	0.408293	1	0.537354	1	0.000142237	0.0409571	ENSG00000137642.8,ENSG00000259571.1	SORL1,BLID	924female:20002_1286male:11:117
924	20002_1286	Usual walking pace	Depression	14	21	5.45362e-05	0.0649448	4.06025e-05	0.14235	-1	-1	-0.441144	0.000267178	0.0461018	ENSG00000165379.9	LRFN5	924female:20002_1286male:14:21
924	20002_1291	Usual walking pace	Mania/Bipolar disorder	20	36	4.95407e-05	0	8.87101e-05	0.189008	-1	-1	-0.0231023	0.000210657	0.0437892			924female:20002_1291male:20:36
I9_CHD	20002_1223	Major coronary heart disease event	Type 2 diabetes	3	43	8.47663e-05	0.0167781	1.33022e-05	0.621567	1	0.0235024	1	1.59628e-05	0.0328404	ENSG00000163818.12,ENSG00000173585.11,ENSG00000163820.10,ENSG00000172215.5,ENSG00000173578.6,ENSG00000183625.10,ENSG00000163823.3,ENSG00000121807.5,ENSG00000160791.12,ENSG00000121797.9,ENSG00000012223.8,ENSG00000163825.3,ENSG00000163827.8,ENSG00000268324.1,ENSG00000241186.3,ENSG00000178038.12,ENSG00000181585.3,ENSG00000206549.8,ENSG00000261603.1,ENSG00000188086.8,ENSG00000178055.8,ENSG00000160808…	LZTFL1,CCR9,FYCO1,CXCR6,XCR1,CCR3,CCR1,CCR2,CCR5,CCRL2,LTF,RTP3,LRRC2,LUZPP1,TDGF1,ALS2CL,TMIE,PRSS50,PRSS46,PRSS45,PRSS42,MYL3,PTH1R,AC109583.1,CCDC12,NBEAL2,SETD2,KIF9,KLHL18,PTPN23,SCAP,ELP6	I9_CHDfemale:20002_1223male:3:43
I9_CHD	20002_1291	Major coronary heart disease event	Mania/Bipolar disorder	8	73	2.30771e-05	0.679241	9.32609e-05	0	1	0.392139	1	0.000310823	0.0481078	ENSG00000046889.14,ENSG00000248801.3,ENSG00000165084.11	PREX2,RP11-664D7.4,C8orf34	I9_CHDfemale:20002_1291male:8:73
II_NEOPLASM	20002_1286	Neoplasms	Depression	3	66	1.19826e-05	0.492119	8.14801e-05	0.0168925	1	0.158116	1	1.06083e-05	0.0324382			II_NEOPLASMfemale:20002_1286male:3:66
II_NEOPLASM	20002_1291	Neoplasms	Mania/Bipolar disorder	2	3	5.67954e-05	0.235204	3.37928e-05	0.514934	1	0.129913	1	7.85586e-05	0.0387669	ENSG00000115705.16,ENSG00000130508.6	TPO,PXDN	II_NEOPLASMfemale:20002_1291male:2:3
II_NEOPLASM	20002_1291	Neoplasms	Mania/Bipolar disorder	7	18	4.01742e-05	0.316492	2.10079e-05	0	-1	-1	-0.0111011	5.02809e-05	0.037033	ENSG00000122644.8	ARL4A	II_NEOPLASMfemale:20002_1291male:7:18

## Sheet: LAVA
Significant regions identified by HDL-L among 30 phenotypes in UK Biobank
Phenotype1	Phenotype2	Phenotype_Description1	Phenotype_Description2	chr	piece	Heritability_1	Heritability_2	P_value_Heritability_1	P_value_Heritability_2	rg	Lower_bound_rg	Upper_bound_rg	P	Pfdr	ID
100005	1299	Carbohydrate	Salad / raw vegetable intake	5	146	0.00481709	0.000416015	2.99483e-09	0.00116796	1	0.62708	1	3.79748e-07	0.00113355	100005:1299:5:146
100005	21001	Carbohydrate	Body mass index (BMI)	3	151	0.00172689	0.000463603	0.00166606	5.56283e-06	1	0.58432	1	1.34231e-05	0.018124	100005:21001:3:151
100005	21001	Carbohydrate	Body mass index (BMI)	6	132	0.00418827	0.000325719	1.57263e-07	0.00486305	0.977846	0.55374	1	5.0944e-05	0.0460951	100005:21001:6:132
100005	3526	Carbohydrate	Mother's age at death	6	137	0.00343832	0.000527235	3.62868e-06	0.00440227	1	0.56164	1	1.75e-05	0.0220176	100005:3526:6:137
100005	50	Carbohydrate	Standing height	9	84	0.0026911	0.00328482	0.000346902	4.05058e-64	0.580254	0.31916	0.96388	4.37374e-05	0.041811	100005:50:9:84
100150	100240	Drinking water intake	Coffee consumed	15	43	0.00313912	0.00129214	7.30374e-07	0.0164581	-1	-1	-0.50381	1.80606e-05	0.0223419	100150:100240:15:43
100150	1309	Drinking water intake	Fresh fruit intake	17	10	0.00204182	0.000509158	0.00250155	6.09993e-05	1	0.54247	1	4.8212e-05	0.0442811	100150:1309:17:10
100150	21001	Drinking water intake	Body mass index (BMI)	8	136	0.00198849	0.000722794	0.00077346	5.71671e-10	-0.86358	-1	-0.5058	5.51887e-05	0.0489895	100150:21001:8:136
100150	22501	Drinking water intake	Year ended full time education	11	126	0.00199066	0.00160099	0.00235571	0.000493917	1	0.50531	1	2.7287e-05	0.0300474	100150:22501:11:126
100150	23105	Drinking water intake	Basal metabolic rate	15	39	0.00204904	0.000841004	0.00351338	2.52838e-09	1	0.60659	1	7.2654e-06	0.0115833	100150:23105:15:39
100150	I9_CHD	Drinking water intake	Major coronary heart disease event	8	133	0.00172947	0.000559696	0.00572256	2.90277e-06	-1	-1	-0.54623	3.70235e-05	0.0372369	100150:I9_CHD:8:133
100150	20002_1286	Drinking water intake	Depression	3	15	0.00215758	0.000762252	0.00269441	9.21293e-09	0.947228	0.55092	1	2.31465e-05	0.0269496	100150:20002_1286:3:15
100240	102	Coffee consumed	Pulse rate, automated reading	6	130	0.0026484	0.000457244	0.000368862	0.000483415	-1	-1	-0.55554	3.36946e-06	0.00645263	100240:102:6:130
100240	1160	Coffee consumed	Sleep duration	13	72	0.0039249	0.000575748	3.13974e-07	9.34249e-06	-0.822243	-1	-0.47851	2.31903e-05	0.0269496	100240:1160:13:72
100240	1210	Coffee consumed	Snoring	15	14	0.00500876	0.000796248	1.46628e-10	1.05913e-08	0.664154	0.37796	1	2.6853e-05	0.0297308	100240:1210:15:14
100240	20022	Coffee consumed	Birth weight	9	84	0.00360538	0.000522883	3.10626e-06	0.0221014	1	0.48989	1	4.72483e-05	0.0438073	100240:20022:9:84
100240	20116_2	Coffee consumed	Smoking status: Current	5	11	0.00400116	0.000449364	8.48402e-07	0.000155407	-0.868428	-1	-0.48512	3.82781e-05	0.0380869	100240:20116_2:5:11
100240	2139	Coffee consumed	Age first had sexual intercourse	15	11	0.00189533	0.000594402	0.0041916	3.19434e-05	-1	-1	-0.53716	2.4683e-05	0.0279316	100240:2139:15:11
100240	I9_CHD	Coffee consumed	Major coronary heart disease event	17	15	0.00191492	0.000479904	0.00201853	1.80776e-05	-1	-1	-0.54857	5.0608e-05	0.0459276	100240:I9_CHD:17:15
102	1309	Pulse rate, automated reading	Fresh fruit intake	16	34	0.000903112	0.00049086	1.38629e-11	0.000245972	-1	-1	-0.67386	1.60805e-08	7.20008e-05	102:1309:16:34
102	1558	Pulse rate, automated reading	Alcohol intake frequency.	1	113	0.000833274	0.00052491	8.25197e-12	1.19615e-05	-0.726164	-1	-0.41041	3.51953e-05	0.0360807	102:1558:1:113
102	1558	Pulse rate, automated reading	Alcohol intake frequency.	2	30	0.0011899	0.000805333	1.84161e-22	1.27202e-11	0.82505	0.62222	1	3.15201e-10	2.04191e-06	102:1558:2:30
102	20022	Pulse rate, automated reading	Birth weight	1	164	0.000416351	0.000835245	1.0905e-05	6.03472e-05	1	0.63431	1	3.75081e-06	0.00694234	102:20022:1:164
102	20022	Pulse rate, automated reading	Birth weight	7	92	0.000497251	0.000600927	1.05673e-08	0.000386124	0.992964	0.64898	1	1.28338e-05	0.0174055	102:20022:7:92
102	20458	Pulse rate, automated reading	General happiness	7	32	0.000613757	0.000800677	9.42941e-08	0.0154378	1	0.53365	1	4.63027e-05	0.0432449	102:20458:7:32
102	20458	Pulse rate, automated reading	General happiness	15	61	0.00122735	0.00186368	1.10527e-17	1.64643e-05	0.784378	0.50421	1	8.26544e-07	0.00207983	102:20458:15:61
102	21001	Pulse rate, automated reading	Body mass index (BMI)	1	62	0.000321906	0.000784327	1.31468e-06	1.8371e-17	0.806022	0.54172	1	7.41673e-06	0.0117629	102:21001:1:62
102	21001	Pulse rate, automated reading	Body mass index (BMI)	2	30	0.0011899	0.00119371	1.84161e-22	7.40363e-20	-0.510804	-0.71906	-0.30812	6.98141e-06	0.0112766	102:21001:2:30
102	21001	Pulse rate, automated reading	Body mass index (BMI)	3	161	0.000621458	0.000824417	1.00438e-07	5.4315e-10	-0.897256	-1	-0.61903	8.7072e-08	0.000323304	102:21001:3:161
102	21001	Pulse rate, automated reading	Body mass index (BMI)	5	63	0.000327293	0.000314022	4.20845e-06	3.17403e-05	-1	-1	-0.66786	1.77965e-05	0.0222564	102:21001:5:63
102	21001	Pulse rate, automated reading	Body mass index (BMI)	6	47	0.000358528	0.000285686	1.94815e-05	0.000858852	-1	-1	-0.58371	2.9651e-05	0.0316252	102:21001:6:47
102	21001	Pulse rate, automated reading	Body mass index (BMI)	15	34	0.000310884	0.000637981	0.00188507	2.74635e-07	1	0.59629	1	9.99567e-06	0.014738	102:21001:15:34
102	21001	Pulse rate, automated reading	Body mass index (BMI)	15	42	0.00257831	0.000447054	4.79586e-69	3.07206e-06	0.782158	0.56233	1	1.28694e-08	5.80499e-05	102:21001:15:42
102	2149	Pulse rate, automated reading	Lifetime number of sexual partners	7	105	0.000737434	0.000333245	5.74511e-13	0.0018916	0.973707	0.62205	1	9.31256e-06	0.0139332	102:2149:7:105
102	22501	Pulse rate, automated reading	Year ended full time education	14	4	0.00528759	0.00165192	3.98911e-136	0.000959762	-0.643886	-1	-0.39408	2.52704e-06	0.00512941	102:22501:14:4
102	22501	Pulse rate, automated reading	Year ended full time education	20	59	0.000827245	0.000721018	8.12731e-14	0.033364	1	0.54296	1	1.28316e-05	0.0174055	102:22501:20:59
102	23105	Pulse rate, automated reading	Basal metabolic rate	1	62	0.000321906	0.0006398	1.31468e-06	2.61614e-13	0.766111	0.46737	1	4.47579e-05	0.0423873	102:23105:1:62
102	23105	Pulse rate, automated reading	Basal metabolic rate	2	30	0.0011899	0.00181053	1.84161e-22	2.68058e-34	-0.630092	-0.8015	-0.46205	5.02411e-10	3.12183e-06	102:23105:2:30
102	23105	Pulse rate, automated reading	Basal metabolic rate	3	124	0.000296299	0.00227319	0.000269954	2.4763e-51	0.855368	0.59925	1	2.26407e-07	0.000761707	102:23105:3:124
102	23105	Pulse rate, automated reading	Basal metabolic rate	3	161	0.000621458	0.000967492	1.00438e-07	3.27191e-12	-0.79841	-1	-0.52772	5.65061e-07	0.00153612	102:23105:3:161
102	23105	Pulse rate, automated reading	Basal metabolic rate	5	63	0.000327293	0.000372481	4.20845e-06	2.97866e-06	-1	-1	-0.68575	8.70338e-07	0.00217207	102:23105:5:63
102	23105	Pulse rate, automated reading	Basal metabolic rate	6	30	0.000409057	0.00188999	1.28415e-05	2.41217e-37	-0.761587	-1	-0.5183	3.62518e-07	0.00109827	102:23105:6:30
102	23105	Pulse rate, automated reading	Basal metabolic rate	9	111	0.000386615	0.000429964	0.000128948	0.000132906	-1	-1	-0.59385	8.36353e-06	0.0127642	102:23105:9:111
102	23105	Pulse rate, automated reading	Basal metabolic rate	11	62	0.000955037	0.000363918	3.23209e-16	0.00045495	-0.90016	-1	-0.5878	2.01551e-06	0.00424775	102:23105:11:62
102	23105	Pulse rate, automated reading	Basal metabolic rate	14	2	0.00121905	0.00133877	1.00396e-16	2.30118e-16	-0.476185	-0.7118	-0.25656	5.39125e-05	0.0484213	102:23105:14:2
102	23105	Pulse rate, automated reading	Basal metabolic rate	14	33	0.000350808	0.000628139	8.2796e-05	1.11454e-08	1	0.67146	1	1.45288e-06	0.0033012	102:23105:14:33
102	23105	Pulse rate, automated reading	Basal metabolic rate	15	34	0.000310884	0.000594297	0.00188507	1.64664e-06	1	0.58942	1	4.03217e-06	0.00730762	102:23105:15:34
102	23105	Pulse rate, automated reading	Basal metabolic rate	16	4	0.00043664	0.00168082	6.8234e-05	1.74419e-26	-0.90813	-1	-0.64559	9.35564e-09	4.34889e-05	102:23105:16:4
102	23105	Pulse rate, automated reading	Basal metabolic rate	16	34	0.000903112	0.00498101	1.38629e-11	9.87163e-109	-0.487546	-0.67219	-0.31458	2.23032e-07	0.000758736	102:23105:16:34
102	50	Pulse rate, automated reading	Standing height	2	30	0.0011899	0.00102079	1.84161e-22	4.82915e-16	-0.490781	-0.71486	-0.27702	3.61129e-05	0.0366512	102:50:2:30
102	50	Pulse rate, automated reading	Standing height	3	124	0.000296299	0.00465229	0.000269954	5.56436e-127	1	0.78328	1	1.44235e-11	1.25473e-07	102:50:3:124
102	50	Pulse rate, automated reading	Standing height	3	162	0.000362369	0.00213969	1.33428e-05	1.28735e-49	-0.598016	-0.91687	-0.3338	5.51703e-05	0.0489895	102:50:3:162
102	50	Pulse rate, automated reading	Standing height	9	75	0.000276959	0.00151815	0.000471918	1.789e-31	-0.736306	-1	-0.43763	3.65885e-05	0.0370721	102:50:9:75
102	50	Pulse rate, automated reading	Standing height	11	62	0.000955037	0.000834693	3.23209e-16	7.01118e-12	-0.673617	-0.92965	-0.44558	9.43244e-07	0.00232543	102:50:11:62
102	50	Pulse rate, automated reading	Standing height	14	2	0.00121905	0.0014287	1.00396e-16	1.99028e-18	-0.476534	-0.70062	-0.26386	3.38201e-05	0.0350247	102:50:14:2
102	50	Pulse rate, automated reading	Standing height	15	42	0.00257831	0.00165904	4.79586e-69	6.56982e-35	-0.391008	-0.53749	-0.24254	1.47215e-06	0.00330795	102:50:15:42
102	50	Pulse rate, automated reading	Standing height	16	4	0.00043664	0.00215205	6.8234e-05	2.49302e-38	-0.738134	-1	-0.47998	6.87866e-07	0.00180548	102:50:16:4
102	50	Pulse rate, automated reading	Standing height	16	34	0.000903112	0.00110894	1.38629e-11	1.30301e-13	-0.597381	-0.87707	-0.34464	1.21689e-05	0.0167651	102:50:16:34
102	50	Pulse rate, automated reading	Standing height	20	33	0.00283948	0.000387805	1.9759e-71	0.000151601	-0.69594	-1	-0.44182	2.78693e-06	0.00558532	102:50:20:33
102	924	Pulse rate, automated reading	Usual walking pace	16	32	0.00068557	0.000582788	1.45536e-08	4.37515e-06	-0.763939	-1	-0.44327	3.33416e-05	0.034588	102:924:16:32
102	I9_CHD	Pulse rate, automated reading	Major coronary heart disease event	5	119	0.000533247	0.000331748	2.55597e-06	0.000464369	1	0.60535	1	3.92765e-06	0.00718233	102:I9_CHD:5:119
102	II_NEOPLASM	Pulse rate, automated reading	Neoplasms	17	38	0.00100702	0.000215561	2.06153e-14	0.0483321	1	0.51202	1	5.59616e-05	0.0491913	102:II_NEOPLASM:17:38
102	20002_1286	Pulse rate, automated reading	Depression	4	9	0.000486098	0.00038564	2.96323e-05	6.76381e-05	1	0.61606	1	1.88692e-06	0.00403167	102:20002_1286:4:9
1031	1110	Frequency of friend/family visits	Length of mobile phone use	9	84	0.000567671	0.000301163	1.09901e-06	0.00984617	-1	-1	-0.53787	3.96073e-05	0.0387759	1031:1110:9:84
1031	1170	Frequency of friend/family visits	Getting up in morning	7	135	0.000395009	0.00054291	0.000200419	1.94922e-05	-0.969429	-1	-0.5699	2.51301e-05	0.0281695	1031:1170:7:135
1031	1210	Frequency of friend/family visits	Snoring	5	7	0.000575351	0.000332697	4.1232e-07	0.00520677	1	0.54622	1	8.30363e-06	0.0127046	1031:1210:5:7
1031	1210	Frequency of friend/family visits	Snoring	19	9	0.000181544	0.000717265	0.0280295	3.10305e-08	1	0.50062	1	2.72548e-05	0.0300474	1031:1210:19:9
1031	1210	Frequency of friend/family visits	Snoring	21	11	0.000293528	0.000448957	0.000756072	5.30178e-05	-1	-1	-0.57668	3.56187e-05	0.0363705	1031:1210:21:11
1031	20116_2	Frequency of friend/family visits	Smoking status: Current	2	183	0.000873598	0.000502909	1.15783e-11	0.000206209	-0.767925	-1	-0.42287	3.86835e-05	0.0383025	1031:20116_2:2:183
1031	21001	Frequency of friend/family visits	Body mass index (BMI)	3	4	0.000660584	0.00093649	1.91854e-07	7.99041e-10	-0.734547	-1	-0.44281	7.06014e-06	0.0113736	1031:21001:3:4
1031	21001	Frequency of friend/family visits	Body mass index (BMI)	6	87	0.000227048	0.000402957	0.00289521	3.39242e-05	-1	-1	-0.54179	3.67291e-05	0.037101	1031:21001:6:87
1031	21001	Frequency of friend/family visits	Body mass index (BMI)	6	88	0.000598524	0.000594896	2.92115e-10	2.25912e-08	-0.684153	-1	-0.38759	5.4846e-05	0.0488276	1031:21001:6:88
1031	21001	Frequency of friend/family visits	Body mass index (BMI)	9	103	0.0003039	0.00076211	0.00113001	1.50185e-09	-0.882865	-1	-0.50793	4.28942e-05	0.0411341	1031:21001:9:103
1031	21001	Frequency of friend/family visits	Body mass index (BMI)	20	1	0.00036002	0.000567692	0.000588815	1.03259e-05	-0.966863	-1	-0.55118	3.85104e-05	0.0382227	1031:21001:20:1
1031	2139	Frequency of friend/family visits	Age first had sexual intercourse	3	4	0.000660584	0.000654926	1.91854e-07	3.49584e-05	0.822606	0.46274	1	2.60972e-05	0.0290525	1031:2139:3:4
1031	22501	Frequency of friend/family visits	Year ended full time education	6	88	0.000598524	0.000866989	2.92115e-10	0.0111915	1	0.57843	1	5.24954e-06	0.00903618	1031:22501:6:88
1031	22501	Frequency of friend/family visits	Year ended full time education	9	84	0.000567671	0.0019651	1.09901e-06	0.000144266	0.935953	0.57072	1	1.09245e-05	0.0156631	1031:22501:9:84
1031	3526	Frequency of friend/family visits	Mother's age at death	19	5	0.000347035	0.000592432	0.000154267	0.000639997	-1	-1	-0.54898	4.83433e-05	0.0443003	1031:3526:19:5
1031	50	Frequency of friend/family visits	Standing height	20	43	0.000460655	0.0012684	6.84564e-08	1.00068e-24	0.694744	0.46081	0.97627	2.1781e-06	0.0045137	1031:50:20:43
1031	20002_1286	Frequency of friend/family visits	Depression	1	53	0.000774163	0.000415911	1.45309e-10	0.000108096	0.799864	0.46243	1	2.35277e-05	0.0270832	1031:20002_1286:1:53
1031	20002_1291	Frequency of friend/family visits	Mania/Bipolar disorder	14	13	0.000911216	0.000715051	1.30293e-11	3.84046e-82	-0.413788	-0.60501	-0.23685	1.76457e-05	0.0221551	1031:20002_1291:14:13
1110	1210	Length of mobile phone use	Snoring	11	68	0.000254921	0.000343415	0.00190567	0.000704891	-1	-1	-0.50377	2.76155e-05	0.0302451	1110:1210:11:68
1110	21001	Length of mobile phone use	Body mass index (BMI)	1	95	0.000702674	0.000247914	5.94e-09	0.00447172	0.986393	0.59212	1	3.45894e-05	0.0355793	1110:21001:1:95
1110	21001	Length of mobile phone use	Body mass index (BMI)	14	26	0.000864691	0.00031493	4.22886e-14	0.000116527	0.986827	0.7012	1	3.01404e-07	0.000960931	1110:21001:14:26
1110	2139	Length of mobile phone use	Age first had sexual intercourse	3	99	0.000785878	0.00112798	3.84428e-11	7.84638e-13	-0.619498	-0.90449	-0.36432	1.2311e-05	0.0169226	1110:2139:3:99
1110	2139	Length of mobile phone use	Age first had sexual intercourse	13	83	0.000334779	0.00113582	0.00264173	3.82683e-11	-0.958239	-1	-0.58761	5.65367e-06	0.00956323	1110:2139:13:83
1110	2207	Length of mobile phone use	Wears glasses or contact lenses	12	113	0.000704498	0.000467476	1.55838e-08	0.000209566	-0.846982	-1	-0.5002	2.5157e-05	0.0281695	1110:2207:12:113
1110	22501	Length of mobile phone use	Year ended full time education	6	18	0.00149173	0.000533844	0.00064949	2.88045e-07	-0.908356	-1	-0.52791	5.5524e-05	0.0490979	1110:22501:6:18
1110	23105	Length of mobile phone use	Basal metabolic rate	1	95	0.000743103	0.000247914	1.87967e-09	0.00447172	1	0.60624	1	1.35684e-05	0.0182796	1110:23105:1:95
1110	23105	Length of mobile phone use	Basal metabolic rate	13	86	0.000464468	0.00038654	0.000323596	0.000437374	1	0.55441	1	9.04346e-06	0.0136649	1110:23105:13:86
1110	23105	Length of mobile phone use	Basal metabolic rate	14	26	0.000572375	0.00031493	5.27325e-08	0.000116527	0.88668	0.53656	1	3.97128e-05	0.0388066	1110:23105:14:26
1110	23105	Length of mobile phone use	Basal metabolic rate	17	3	0.00106711	0.00030851	1.11204e-14	0.00117978	0.930558	0.59864	1	2.51477e-06	0.00512158	1110:23105:17:3
1110	50	Length of mobile phone use	Standing height	2	67	0.000554952	0.000434165	1.07914e-05	5.42464e-05	-1	-1	-0.62642	1.91305e-08	8.44158e-05	1110:50:2:67
1110	50	Length of mobile phone use	Standing height	16	3	0.00163325	0.000112931	9.97093e-28	0.109174	-1	-1	-0.47154	1.45682e-05	0.0192017	1110:50:16:3
1110	20002_1223	Length of mobile phone use	Type 2 diabetes	17	27	0.000362002	0.000350014	7.71056e-06	0.000550877	1	0.60112	1	4.84641e-07	0.00135999	1110:20002_1223:17:27
1110	20002_1291	Length of mobile phone use	Mania/Bipolar disorder	15	66	0.000367901	0.000268845	1.47784e-12	0.00188432	0.865487	0.49962	1	4.5287e-05	0.0426232	1110:20002_1291:15:66
1160	2040	Sleep duration	Risk taking	17	11	0.000280872	0.000439742	0.00395868	0.000285948	-1	-1	-0.50056	2.00857e-05	0.0241658	1160:2040:17:11
1160	20458	Sleep duration	General happiness	17	5	0.000232452	0.00144772	0.00871249	8.55231e-05	1	0.4922	1	5.44873e-05	0.0486463	1160:20458:17:5
1160	21001	Sleep duration	Body mass index (BMI)	1	155	0.00153878	0.000422369	6.21192e-22	0.000136991	-0.69835	-1	-0.40595	1.70946e-05	0.021552	1160:21001:1:155
1160	21001	Sleep duration	Body mass index (BMI)	4	97	0.000957948	0.000193273	1.27651e-14	0.0132176	-1	-1	-0.59541	1.59655e-06	0.0035482	1160:21001:4:97
1160	21001	Sleep duration	Body mass index (BMI)	16	34	0.00679671	0.00100329	1.28402e-165	1.54663e-14	-0.559281	-0.7246	-0.40795	2.6924e-11	2.12924e-07	1160:21001:16:34
1160	2139	Sleep duration	Age first had sexual intercourse	8	17	0.000190565	0.000582255	0.00888729	4.37206e-07	-1	-1	-0.54087	7.16887e-06	0.0115183	1160:2139:8:17
1160	2139	Sleep duration	Age first had sexual intercourse	18	34	0.000268646	0.00067378	0.0028718	5.22773e-07	1	0.57717	1	6.32481e-07	0.00169667	1160:2139:18:34
1160	2149	Sleep duration	Lifetime number of sexual partners	5	144	0.000656918	0.000414332	5.51157e-05	0.000243355	-0.981092	-1	-0.58071	2.92298e-05	0.031392	1160:2149:5:144
1160	2149	Sleep duration	Lifetime number of sexual partners	16	34	0.00102252	0.00100329	3.61576e-09	1.54663e-14	0.581342	0.32278	0.87547	4.41012e-05	0.041916	1160:2149:16:34
1160	23105	Sleep duration	Basal metabolic rate	16	34	0.00498101	0.00100329	9.87163e-109	1.54663e-14	-0.444025	-0.61866	-0.28074	4.97189e-07	0.00138246	1160:23105:16:34
1160	23105	Sleep duration	Basal metabolic rate	17	37	0.00103023	0.00043326	1.69017e-15	4.55368e-06	0.733788	0.44407	1	1.064e-05	0.0153899	1160:23105:17:37
1160	50	Sleep duration	Standing height	4	79	0.00152357	0.000220211	3.21654e-31	0.00250525	-0.951618	-1	-0.64406	9.32373e-07	0.00230798	1160:50:4:79
1160	50	Sleep duration	Standing height	7	104	0.000853588	0.000161219	2.31387e-13	0.0231635	1	0.56556	1	2.33987e-05	0.0269857	1160:50:7:104
1160	50	Sleep duration	Standing height	17	37	0.00308478	0.00043326	1.0669e-69	4.55368e-06	0.73173	0.50255	1	2.50151e-08	0.000107273	1160:50:17:37
1160	20002_1223	Sleep duration	Type 2 diabetes	16	34	0.000536372	0.00100329	5.07119e-10	1.54663e-14	-0.643009	-0.92055	-0.39396	3.95803e-06	0.00721621	1160:20002_1223:16:34
1160	20002_1223	Sleep duration	Type 2 diabetes	18	11	0.000496572	0.000260989	1.15307e-07	0.00761313	-1	-1	-0.55495	5.37957e-06	0.00922775	1160:20002_1223:18:11
1170	21001	Getting up in morning	Body mass index (BMI)	3	45	0.000313707	0.000573431	1.80456e-07	8.6032e-13	0.797307	0.51254	1	2.11469e-05	0.0249345	1170:21001:3:45
1170	21001	Getting up in morning	Body mass index (BMI)	16	34	0.000714992	0.00679671	4.5251e-09	1.28402e-165	0.743014	0.5749	0.94847	2.28952e-14	3.2423e-10	1170:21001:16:34
1170	2139	Getting up in morning	Age first had sexual intercourse	10	118	0.00030139	0.000560501	0.00167935	3.25793e-05	1	0.55508	1	4.75101e-05	0.0439117	1170:2139:10:118
1170	22501	Getting up in morning	Year ended full time education	14	42	0.000338881	0.000731164	8.04175e-06	0.0132015	-1	-1	-0.49668	3.98936e-05	0.0388066	1170:22501:14:42
1170	23105	Getting up in morning	Basal metabolic rate	16	34	0.000714992	0.00498101	4.5251e-09	9.87163e-109	0.810579	0.64596	1	2.23048e-15	3.48265e-11	1170:23105:16:34
1170	3526	Getting up in morning	Mother's age at death	2	66	0.000330845	0.000445576	8.25165e-05	0.00316065	-1	-1	-0.5235	2.75762e-05	0.0302451	1170:3526:2:66
1170	50	Getting up in morning	Standing height	2	216	0.00039319	0.000278552	1.56685e-06	0.00106826	1	0.60542	1	1.39022e-06	0.00317065	1170:50:2:216
1170	II_NEOPLASM	Getting up in morning	Neoplasms	9	6	0.000531477	0.000387566	1.00449e-06	0.000594808	-0.9753	-1	-0.5867	1.68827e-05	0.0213734	1170:II_NEOPLASM:9:6
1210	1299	Snoring	Salad / raw vegetable intake	10	111	0.00044087	0.000407968	0.000135253	4.65863e-05	-1	-1	-0.59869	1.33942e-05	0.018124	1210:1299:10:111
1210	20022	Snoring	Birth weight	16	34	0.00053855	0.00114235	1.69416e-05	2.5307e-05	-0.869657	-1	-0.48169	4.72499e-05	0.0438073	1210:20022:16:34
1210	21001	Snoring	Body mass index (BMI)	6	34	0.000728179	0.000191374	2.44708e-10	0.0154777	-1	-1	-0.56735	3.81116e-05	0.0379996	1210:21001:6:34
1210	21001	Snoring	Body mass index (BMI)	11	31	0.00130536	0.000401671	2.66667e-25	6.10279e-06	-0.657016	-0.99168	-0.388	3.57169e-05	0.0363705	1210:21001:11:31
1210	21001	Snoring	Body mass index (BMI)	15	54	0.000407497	0.000321418	0.000150073	0.000911353	-1	-1	-0.55354	5.59815e-05	0.0491913	1210:21001:15:54
1210	21001	Snoring	Body mass index (BMI)	16	4	0.00103662	0.000229737	1.15694e-13	0.015084	-1	-1	-0.58163	1.28157e-05	0.0174055	1210:21001:16:4
1210	21001	Snoring	Body mass index (BMI)	16	34	0.00679671	0.00053855	1.28402e-165	1.69416e-05	-0.48502	-0.7662	-0.2671	2.32664e-05	0.0269528	1210:21001:16:34
1210	2149	Snoring	Lifetime number of sexual partners	11	69	0.000456426	0.000358021	0.00101506	0.000693377	-1	-1	-0.52094	5.42814e-05	0.0485587	1210:2149:11:69
1210	2149	Snoring	Lifetime number of sexual partners	14	36	0.000781444	0.000173749	1.62494e-09	0.0176005	-1	-1	-0.55771	1.79325e-05	0.022331	1210:2149:14:36
1210	22501	Snoring	Year ended full time education	8	6	0.00129202	0.000597728	0.00244552	9.45633e-08	-1	-1	-0.58475	1.76608e-06	0.00381362	1210:22501:8:6
1210	23105	Snoring	Basal metabolic rate	6	29	0.00275508	0.00020299	4.02153e-66	0.00642703	-0.833413	-1	-0.51263	1.10667e-05	0.0157666	1210:23105:6:29
1210	50	Snoring	Standing height	1	164	0.000757399	0.00026482	5.77748e-11	0.00232987	-1	-1	-0.62653	3.39086e-06	0.00645263	1210:50:1:164
1210	50	Snoring	Standing height	12	98	0.000903181	0.000128314	2.41359e-15	0.0542845	1	0.52306	1	1.53504e-05	0.0200591	1210:50:12:98
1210	50	Snoring	Standing height	17	46	0.00255379	0.000163718	4.35385e-55	0.0299553	0.873046	0.49525	1	3.06536e-05	0.0323506	1210:50:17:46
1210	924	Snoring	Usual walking pace	13	13	0.000410066	0.000300683	0.000497391	0.00340975	1	0.49439	1	5.43047e-05	0.0485587	1210:924:13:13
1210	II_NEOPLASM	Snoring	Neoplasms	10	60	0.000223506	0.000536094	0.0120056	1.42141e-07	-1	-1	-0.53902	4.44873e-05	0.0421966	1210:II_NEOPLASM:10:60
1210	20002_1291	Snoring	Mania/Bipolar disorder	15	61	0.000795696	0.000633537	1.76355e-44	4.99261e-07	0.53392	0.3068	0.80554	1.82717e-05	0.0224547	1210:20002_1291:15:61
1299	20022	Salad / raw vegetable intake	Birth weight	16	5	0.000968548	0.000523211	0.000132889	5.55243e-06	0.989681	0.60352	1	7.63434e-06	0.0119816	1299:20022:16:5
1299	20022	Salad / raw vegetable intake	Birth weight	20	12	0.00163199	0.000138764	3.44681e-10	0.0734712	-1	-1	-0.44574	4.39971e-05	0.041916	1299:20022:20:12
1299	2139	Salad / raw vegetable intake	Age first had sexual intercourse	22	28	0.00100006	0.000181693	4.74375e-10	0.0514628	-1	-1	-0.47558	1.16739e-05	0.0163237	1299:2139:22:28
1299	23105	Salad / raw vegetable intake	Basal metabolic rate	3	75	0.000426072	0.000156099	3.17767e-07	0.00789473	1	0.56521	1	1.91038e-05	0.0232692	1299:23105:3:75
1299	23105	Salad / raw vegetable intake	Basal metabolic rate	6	12	0.000643134	0.000313107	1.69534e-06	0.00312134	1	0.55964	1	6.44834e-07	0.00172222	1299:23105:6:12
1299	50	Salad / raw vegetable intake	Standing height	2	202	0.0013253	0.00028581	1.87159e-24	0.000637684	-0.818645	-1	-0.51476	7.41772e-06	0.0117629	1299:50:2:202
1299	50	Salad / raw vegetable intake	Standing height	10	97	0.00141949	0.000171022	2.10642e-25	0.0262301	-1	-1	-0.59481	8.39189e-06	0.0127755	1299:50:10:97
1299	50	Salad / raw vegetable intake	Standing height	10	115	0.00164891	0.000367181	2.95172e-27	0.000329315	-0.756914	-1	-0.46721	4.94212e-06	0.00867282	1299:50:10:115
1309	21001	Fresh fruit intake	Body mass index (BMI)	2	1	0.000119336	0.00187682	0.05395	4.35474e-41	1	0.56479	1	1.15512e-06	0.00272637	1309:21001:2:1
1309	21001	Fresh fruit intake	Body mass index (BMI)	11	49	0.000109005	0.000818064	0.0289749	1.45054e-17	1	0.57206	1	3.68592e-05	0.0371608	1309:21001:11:49
1309	21001	Fresh fruit intake	Body mass index (BMI)	18	49	0.000381018	0.00286229	1.95469e-06	8.6102e-73	0.846679	0.64301	1	9.03909e-10	5.39636e-06	1309:21001:18:49
1309	2139	Fresh fruit intake	Age first had sexual intercourse	6	138	0.000310388	0.000897203	0.00175864	1.62099e-09	-0.897575	-1	-0.51503	3.88569e-05	0.0384117	1309:2139:6:138
1309	22501	Fresh fruit intake	Year ended full time education	9	49	0.000302536	0.0013384	0.000516267	0.000743739	1	0.53999	1	3.91749e-05	0.0385384	1309:22501:9:49
1309	23105	Fresh fruit intake	Basal metabolic rate	18	49	0.000381018	0.00320572	1.95469e-06	4.93706e-82	0.910479	0.71712	1	1.70965e-11	1.40686e-07	1309:23105:18:49
1309	23105	Fresh fruit intake	Basal metabolic rate	20	31	0.000154131	0.0023272	0.00567071	6.62258e-62	0.836216	0.50125	1	4.92879e-05	0.0449331	1309:23105:20:31
1309	50	Fresh fruit intake	Standing height	15	36	0.000347683	0.000666072	3.52094e-05	5.06058e-10	1	0.69585	1	3.30311e-07	0.00102192	1309:50:15:36
1309	50	Fresh fruit intake	Standing height	18	49	0.000381018	0.000491926	1.95469e-06	1.5094e-07	0.918697	0.60622	1	6.50489e-06	0.0106481	1309:50:18:49
1309	20002_1291	Fresh fruit intake	Mania/Bipolar disorder	5	144	0.000677381	0.000495636	5.98025e-08	4.98353e-55	-0.574136	-0.81832	-0.36555	6.93685e-07	0.00181294	1309:20002_1291:5:144
1558	20022	Alcohol intake frequency.	Birth weight	2	27	0.000402867	0.000538719	1.60446e-06	0.00225917	-1	-1	-0.59113	5.11874e-05	0.0462466	1558:20022:2:27
1558	20022	Alcohol intake frequency.	Birth weight	4	103	0.000285943	0.00101616	0.00228455	2.85345e-05	-1	-1	-0.53959	3.37843e-06	0.00645263	1558:20022:4:103
1558	20022	Alcohol intake frequency.	Birth weight	15	13	0.000469592	0.000918367	3.80993e-06	8.58512e-05	-0.992881	-1	-0.6321	6.8224e-06	0.0110785	1558:20022:15:13
1558	20458	Alcohol intake frequency.	General happiness	9	109	0.000357105	0.000857705	0.000135495	0.0071123	1	0.48263	1	2.48733e-05	0.0280489	1558:20458:9:109
1558	20458	Alcohol intake frequency.	General happiness	13	72	0.000269502	0.00207178	0.00638781	1.16314e-06	1	0.55596	1	2.07751e-05	0.0246126	1558:20458:13:72
1558	21001	Alcohol intake frequency.	Body mass index (BMI)	2	67	0.000239901	0.00147652	0.0108368	6.75179e-22	0.876649	0.50767	1	2.36318e-05	0.0271006	1558:21001:2:67
1558	21001	Alcohol intake frequency.	Body mass index (BMI)	4	94	0.00119659	0.000337493	1.32045e-30	4.4878e-05	-0.765704	-1	-0.49872	5.18929e-06	0.0090028	1558:21001:4:94
1558	21001	Alcohol intake frequency.	Body mass index (BMI)	5	75	0.000237829	0.000936198	0.00195414	1.80474e-15	-0.841331	-1	-0.4898	5.58776e-05	0.0491913	1558:21001:5:75
1558	21001	Alcohol intake frequency.	Body mass index (BMI)	6	81	0.00021714	0.000682867	0.00709142	4.02809e-09	1	0.5857	1	2.1682e-05	0.0254886	1558:21001:6:81
1558	21001	Alcohol intake frequency.	Body mass index (BMI)	6	88	0.000302383	0.000594896	0.000209491	2.25912e-08	0.952703	0.60644	1	1.10817e-05	0.0157666	1558:21001:6:88
1558	21001	Alcohol intake frequency.	Body mass index (BMI)	9	97	0.00037141	0.000547521	0.000237346	8.73731e-06	1	0.61049	1	9.63077e-08	0.000352546	1558:21001:9:97
1558	21001	Alcohol intake frequency.	Body mass index (BMI)	11	65	0.000172662	0.000683053	0.0186748	1.27475e-09	1	0.5438	1	5.70033e-05	0.0498732	1558:21001:11:65
1558	21001	Alcohol intake frequency.	Body mass index (BMI)	15	15	0.000277654	0.000629702	0.0037519	7.36762e-07	-1	-1	-0.57753	1.614e-06	0.00356099	1558:21001:15:15
1558	21001	Alcohol intake frequency.	Body mass index (BMI)	16	34	0.000660267	0.00679671	3.82464e-08	1.28402e-165	0.591721	0.4102	0.80837	5.07098e-09	2.5311e-05	1558:21001:16:34
1558	2139	Alcohol intake frequency.	Age first had sexual intercourse	20	61	0.000271908	0.000465392	0.000618113	2.54594e-05	-1	-1	-0.58668	2.39779e-05	0.0274458	1558:2139:20:61
1558	2149	Alcohol intake frequency.	Lifetime number of sexual partners	16	25	0.000824504	0.000637169	5.39787e-11	6.85826e-05	0.850224	0.52313	1	3.69038e-06	0.00685131	1558:2149:16:25
1558	23105	Alcohol intake frequency.	Basal metabolic rate	2	30	0.000714863	0.00181053	3.9342e-12	2.68058e-34	-0.691819	-0.90671	-0.49723	6.25337e-09	3.02218e-05	1558:23105:2:30
1558	23105	Alcohol intake frequency.	Basal metabolic rate	10	96	0.000235601	0.000904361	0.0035574	2.14133e-13	1	0.63891	1	2.46201e-06	0.00503882	1558:23105:10:96
1558	23105	Alcohol intake frequency.	Basal metabolic rate	16	27	0.00024585	0.00135505	0.00143294	4.76071e-25	0.893313	0.57467	1	3.16984e-06	0.0062066	1558:23105:16:27
1558	23105	Alcohol intake frequency.	Basal metabolic rate	16	34	0.000660267	0.00498101	3.82464e-08	9.87163e-109	0.549234	0.36546	0.77166	1.68603e-07	0.000596916	1558:23105:16:34
1558	23105	Alcohol intake frequency.	Basal metabolic rate	16	58	0.000475897	0.000980876	4.10084e-05	9.55745e-11	0.791994	0.47051	1	1.16877e-05	0.0163237	1558:23105:16:58
1558	23105	Alcohol intake frequency.	Basal metabolic rate	18	49	7.93232e-05	0.00320572	0.114218	4.93706e-82	1	0.49543	1	9.16959e-06	0.0137871	1558:23105:18:49
1558	50	Alcohol intake frequency.	Standing height	2	30	0.000714863	0.00102079	3.9342e-12	4.82915e-16	-0.670026	-0.93094	-0.43419	1.24643e-06	0.00287502	1558:50:2:30
1558	50	Alcohol intake frequency.	Standing height	5	145	0.000882553	0.00266146	5.13622e-13	6.21518e-50	0.441717	0.24154	0.64206	1.87614e-05	0.022941	1558:50:5:145
1558	50	Alcohol intake frequency.	Standing height	8	135	0.000414189	0.000446927	9.36063e-06	3.02953e-05	-1	-1	-0.64101	4.82647e-06	0.00855344	1558:50:8:135
1558	50	Alcohol intake frequency.	Standing height	16	1	0.000494108	0.00233665	5.74775e-07	3.54872e-47	-0.598213	-0.8796	-0.36731	4.50205e-06	0.00806321	1558:50:16:1
1558	50	Alcohol intake frequency.	Standing height	16	27	0.00024585	0.000637953	0.00143294	2.51463e-09	0.948524	0.57864	1	3.55927e-05	0.0363705	1558:50:16:27
1558	50	Alcohol intake frequency.	Standing height	17	30	0.000176303	0.000985509	0.022819	9.61373e-15	-1	-1	-0.56891	2.72602e-05	0.0300474	1558:50:17:30
1558	924	Alcohol intake frequency.	Usual walking pace	2	67	0.000239901	0.0011683	0.0108368	1.25337e-15	-0.888889	-1	-0.49831	4.77364e-05	0.0440231	1558:924:2:67
1558	I9_CHD	Alcohol intake frequency.	Major coronary heart disease event	19	13	0.000289625	0.000412974	0.00241196	0.000126984	-1	-1	-0.52737	1.6498e-05	0.0211096	1558:I9_CHD:19:13
20022	20458	Birth weight	General happiness	3	46	0.000591352	0.00121978	5.21765e-05	0.000344417	1	0.59664	1	4.18506e-05	0.0403238	20022:20458:3:46
20022	21001	Birth weight	Body mass index (BMI)	2	194	0.000790732	0.000219397	3.49494e-08	0.0106764	1	0.56289	1	3.98194e-05	0.0388066	20022:21001:2:194
20022	21001	Birth weight	Body mass index (BMI)	6	147	0.000362012	0.000444809	0.00633885	5.46033e-05	1	0.51177	1	1.69217e-05	0.0213783	20022:21001:6:147
20022	21001	Birth weight	Body mass index (BMI)	10	38	0.000508966	0.000808955	0.000704778	4.90792e-10	0.916428	0.56559	1	1.07405e-05	0.0154985	20022:21001:10:38
20022	21001	Birth weight	Body mass index (BMI)	12	4	0.000592064	0.00036974	0.000194322	0.00125458	1	0.55302	1	5.17487e-05	0.0466845	20022:21001:12:4
20022	2207	Birth weight	Wears glasses or contact lenses	17	54	0.000570725	0.000639193	0.000426327	7.61778e-07	0.950015	0.57112	1	1.80631e-05	0.0223419	20022:2207:17:54
20022	23105	Birth weight	Basal metabolic rate	2	194	0.000790732	0.00151234	3.49494e-08	2.49468e-28	0.885314	0.67367	1	3.28483e-10	2.10555e-06	20022:23105:2:194
20022	23105	Birth weight	Basal metabolic rate	2	195	0.000422451	0.000614527	0.000722	1.7836e-08	1	0.63412	1	1.78588e-06	0.00384275	20022:23105:2:195
20022	23105	Birth weight	Basal metabolic rate	3	161	0.000807797	0.000967492	1.40272e-06	3.27191e-12	0.800991	0.51381	1	1.71854e-06	0.00375087	20022:23105:3:161
20022	23105	Birth weight	Basal metabolic rate	4	22	0.000423273	0.00157412	0.000680713	3.99079e-30	0.972613	0.69287	1	1.84398e-07	0.000641645	20022:23105:4:22
20022	23105	Birth weight	Basal metabolic rate	4	135	0.000646329	0.00179814	8.20752e-08	1.89671e-41	0.836065	0.63151	1	2.46464e-09	1.36437e-05	20022:23105:4:135
20022	23105	Birth weight	Basal metabolic rate	9	74	0.000647212	0.00244234	3.44498e-06	1.54867e-52	0.586296	0.33589	0.88053	1.67424e-05	0.0213136	20022:23105:9:74
20022	23105	Birth weight	Basal metabolic rate	10	38	0.000508966	0.00104826	0.000704778	4.45975e-14	0.831691	0.49291	1	1.78411e-05	0.0222627	20022:23105:10:38
20022	23105	Birth weight	Basal metabolic rate	10	90	0.000804957	0.000532245	1.43175e-09	5.14828e-08	0.847131	0.56825	1	3.10912e-06	0.00612711	20022:23105:10:90
20022	23105	Birth weight	Basal metabolic rate	11	4	0.0010691	0.00194853	1.31926e-09	7.19168e-33	0.547299	0.32388	0.78542	8.13605e-06	0.0125428	20022:23105:11:4
20022	23105	Birth weight	Basal metabolic rate	11	68	0.000560359	0.00099801	4.03236e-05	1.37504e-15	0.828046	0.53081	1	3.49249e-06	0.00660474	20022:23105:11:68
20022	23105	Birth weight	Basal metabolic rate	12	14	0.00052872	0.00103679	0.000340547	2.12766e-14	0.811267	0.48423	1	1.66288e-05	0.0212285	20022:23105:12:14
20022	23105	Birth weight	Basal metabolic rate	12	46	0.000885626	0.00101276	6.27787e-10	3.68e-17	0.721706	0.48249	0.98994	7.85057e-07	0.00201711	20022:23105:12:46
20022	23105	Birth weight	Basal metabolic rate	12	62	0.00251134	0.00184147	4.89601e-37	2.49348e-35	0.592661	0.44274	0.74358	3.76064e-11	2.82718e-07	20022:23105:12:62
20022	23105	Birth weight	Basal metabolic rate	12	94	0.00121051	0.00149986	1.36283e-12	7.3818e-25	0.636491	0.42103	0.86318	1.95884e-07	0.00067774	20022:23105:12:94
20022	23105	Birth weight	Basal metabolic rate	12	102	0.00121003	0.000453676	1.61617e-13	2.29329e-05	0.819142	0.51932	1	4.83195e-06	0.00855344	20022:23105:12:102
20022	23105	Birth weight	Basal metabolic rate	12	112	0.000595576	0.00112251	9.5514e-06	5.11711e-19	0.716982	0.43887	1	1.68518e-05	0.0213734	20022:23105:12:112
20022	23105	Birth weight	Basal metabolic rate	15	65	0.0011558	0.0024003	3.92818e-10	4.34434e-42	0.565216	0.36582	0.79467	7.90175e-07	0.00202173	20022:23105:15:65
20022	23105	Birth weight	Basal metabolic rate	16	67	0.00112837	0.00137479	2.097e-08	1.61186e-16	0.584112	0.3311	0.88355	2.96546e-05	0.0316252	20022:23105:16:67
20022	23105	Birth weight	Basal metabolic rate	17	9	0.000874941	0.00171398	5.56237e-08	1.62499e-29	0.644525	0.41192	0.91154	1.70387e-06	0.00373223	20022:23105:17:9
20022	50	Birth weight	Standing height	2	194	0.000790732	0.00161178	3.49494e-08	1.49085e-31	0.751909	0.52824	1	4.09009e-08	0.000163709	20022:50:2:194
20022	50	Birth weight	Standing height	3	46	0.000591352	0.00201366	5.21765e-05	1.33032e-38	0.881905	0.63637	1	8.61e-09	4.06434e-05	20022:50:3:46
20022	50	Birth weight	Standing height	3	108	0.000771811	0.00067422	7.45683e-08	1.19654e-09	-0.902563	-1	-0.62988	2.91737e-07	0.000935006	20022:50:3:108
20022	50	Birth weight	Standing height	3	138	0.00169139	0.00108479	6.96559e-28	5.96141e-23	-0.481506	-0.67949	-0.28534	1.43253e-05	0.0189637	20022:50:3:138
20022	50	Birth weight	Standing height	4	22	0.000423273	0.00392113	0.000680713	9.24982e-100	1	0.75932	1	2.40305e-12	2.34895e-08	20022:50:4:22
20022	50	Birth weight	Standing height	4	135	0.000646329	0.0048888	8.20752e-08	1.22694e-141	0.634907	0.42628	0.868	2.53207e-07	0.000833452	20022:50:4:135
20022	50	Birth weight	Standing height	6	29	0.000572124	0.0061648	5.2022e-06	4.24599e-178	0.547634	0.32157	0.81796	1.42287e-05	0.0189319	20022:50:6:29
20022	50	Birth weight	Standing height	6	30	0.000778515	0.00427422	8.54722e-08	6.87209e-109	0.609606	0.40637	0.84895	2.3579e-07	0.000788916	20022:50:6:30
20022	50	Birth weight	Standing height	6	125	0.00056899	0.00273746	7.71062e-06	3.97755e-66	0.627128	0.38192	0.92878	7.47306e-06	0.0118199	20022:50:6:125
20022	50	Birth weight	Standing height	7	86	0.00066216	0.00267506	2.12926e-06	1.35972e-60	0.568193	0.32965	0.84777	1.56469e-05	0.0203591	20022:50:7:86
20022	50	Birth weight	Standing height	11	4	0.0010691	0.00285411	1.31926e-09	7.11497e-57	0.619468	0.42714	0.84221	2.93113e-08	0.000123096	20022:50:11:4
20022	50	Birth weight	Standing height	11	48	0.000510514	0.00146095	0.00019399	4.92737e-26	0.779689	0.49311	1	3.87127e-06	0.007122	20022:50:11:48
20022	50	Birth weight	Standing height	11	69	0.000838553	0.000943356	6.24465e-07	4.16836e-12	0.991407	0.72788	1	2.62711e-09	1.42836e-05	20022:50:11:69
20022	50	Birth weight	Standing height	12	5	0.00164917	0.00148541	3.40782e-17	1.92936e-22	0.508121	0.30415	0.72466	6.206e-06	0.0102415	20022:50:12:5
20022	50	Birth weight	Standing height	12	14	0.00052872	0.00181948	0.000340547	2.64488e-32	0.726275	0.43493	1	9.08699e-06	0.0136967	20022:50:12:14
20022	50	Birth weight	Standing height	12	46	0.000885626	0.00135329	6.27787e-10	6.72626e-26	0.804554	0.59986	1	3.27664e-09	1.72007e-05	20022:50:12:46
20022	50	Birth weight	Standing height	12	62	0.00251134	0.00329345	4.89601e-37	2.19061e-77	0.547158	0.41449	0.68111	6.29846e-13	7.23661e-09	20022:50:12:62
20022	50	Birth weight	Standing height	12	94	0.00121051	0.0021761	1.36283e-12	2.24614e-42	0.455731	0.25334	0.66737	3.56736e-05	0.0363705	20022:50:12:94
20022	50	Birth weight	Standing height	12	112	0.000595576	0.00179871	9.5514e-06	1.18755e-36	0.728973	0.48269	1	1.01729e-06	0.0024485	20022:50:12:112
20022	50	Birth weight	Standing height	15	42	0.000366601	0.00165904	0.00141175	6.56982e-35	0.743259	0.42979	1	4.52015e-05	0.0426086	20022:50:15:42
20022	50	Birth weight	Standing height	15	65	0.0011558	0.00398989	3.92818e-10	6.30297e-86	0.650793	0.4746	0.84837	2.27556e-10	1.50618e-06	20022:50:15:65
20022	50	Birth weight	Standing height	16	3	0.000762699	0.00163325	1.59781e-06	9.97093e-28	0.660298	0.40717	0.96981	4.92242e-06	0.00866322	20022:50:16:3
20022	50	Birth weight	Standing height	16	65	0.000800381	0.00148159	7.20325e-06	9.48204e-21	0.63546	0.36664	0.97781	2.62285e-05	0.0291454	20022:50:16:65
20022	50	Birth weight	Standing height	16	67	0.00112837	0.00170883	2.097e-08	2.97128e-23	0.523718	0.28241	0.79542	5.54802e-05	0.0490979	20022:50:16:67
20022	50	Birth weight	Standing height	17	9	0.000874941	0.00291507	5.56237e-08	5.40222e-62	0.523645	0.30736	0.7666	1.18126e-05	0.0164228	20022:50:17:9
20022	50	Birth weight	Standing height	17	24	0.000461511	0.00293274	7.43652e-05	1.29179e-74	0.678565	0.4244	1	1.04197e-05	0.0151432	20022:50:17:24
20022	50	Birth weight	Standing height	17	47	0.000451013	0.00310247	0.000105902	1.07492e-79	0.633897	0.37681	1	2.93706e-05	0.0314324	20022:50:17:47
20022	50	Birth weight	Standing height	17	52	0.000516928	0.00140268	0.000167387	1.2658e-24	0.762518	0.47113	1	7.26641e-06	0.0115833	20022:50:17:52
20022	50	Birth weight	Standing height	19	7	0.00058397	0.00169274	3.37794e-05	8.17988e-32	0.673562	0.40371	1	1.26852e-05	0.0173586	20022:50:19:7
20022	50	Birth weight	Standing height	19	13	0.000295435	0.00229615	0.0277514	2.31422e-42	0.864616	0.48334	1	2.42107e-05	0.0275935	20022:50:19:13
20022	50	Birth weight	Standing height	19	58	0.0012055	0.000645661	2.1556e-13	1.49117e-08	0.782561	0.52288	1	6.15913e-07	0.00165954	20022:50:19:58
20022	50	Birth weight	Standing height	20	32	0.00013327	0.00650218	0.109708	1.85365e-189	1	0.52605	1	1.17612e-05	0.0163888	20022:50:20:32
20022	20002_1291	Birth weight	Mania/Bipolar disorder	9	9	0.000629949	0.000354763	6.4987e-05	9.63727e-26	-0.656372	-1	-0.37159	3.14188e-05	0.0329299	20022:20002_1291:9:9
20116_2	2040	Smoking status: Current	Risk taking	2	67	0.000344744	0.000622912	0.000506759	1.99774e-06	0.957767	0.55966	1	2.47234e-05	0.0279316	20116_2:2040:2:67
20116_2	21001	Smoking status: Current	Body mass index (BMI)	1	44	0.000212222	0.000352143	0.00163388	4.62248e-05	1	0.55545	1	3.85401e-05	0.0382227	20116_2:21001:1:44
20116_2	21001	Smoking status: Current	Body mass index (BMI)	7	48	0.000186394	0.000675447	0.0171548	9.10076e-09	1	0.54548	1	1.43253e-05	0.0189637	20116_2:21001:7:48
20116_2	21001	Smoking status: Current	Body mass index (BMI)	7	116	0.000482131	0.000669018	1.243e-05	6.95451e-07	0.936429	0.60036	1	2.46586e-06	0.00503882	20116_2:21001:7:116
20116_2	21001	Smoking status: Current	Body mass index (BMI)	17	37	0.000206533	0.000896862	0.0106665	4.36159e-13	0.968292	0.56449	1	3.89788e-05	0.0384698	20116_2:21001:17:37
20116_2	2139	Smoking status: Current	Age first had sexual intercourse	3	75	0.000175059	0.000576567	0.00261791	3.22835e-09	-1	-1	-0.62936	8.12318e-06	0.0125428	20116_2:2139:3:75
20116_2	2139	Smoking status: Current	Age first had sexual intercourse	5	141	0.000610586	0.00174745	3.10649e-08	1.34855e-21	-0.609867	-0.89436	-0.35902	5.84136e-06	0.00979905	20116_2:2139:5:141
20116_2	2139	Smoking status: Current	Age first had sexual intercourse	10	60	0.000531918	0.000789201	2.96544e-08	1.36685e-09	-0.72996	-1	-0.44142	1.91062e-05	0.0232692	20116_2:2139:10:60
20116_2	2139	Smoking status: Current	Age first had sexual intercourse	14	10	0.000299203	0.000501184	0.000912911	8.9597e-05	-1	-1	-0.55589	1.13554e-05	0.0161134	20116_2:2139:14:10
20116_2	22501	Smoking status: Current	Year ended full time education	4	132	0.00055769	0.00420069	3.60183e-08	1.94167e-13	-0.654656	-0.97871	-0.38038	1.6501e-05	0.0211096	20116_2:22501:4:132
20116_2	50	Smoking status: Current	Standing height	10	7	0.000179686	0.000709605	0.00720679	1.49766e-11	-0.995391	-1	-0.59494	4.83784e-05	0.0443003	20116_2:50:10:7
20116_2	50	Smoking status: Current	Standing height	17	37	0.000206533	0.00308478	0.0106665	1.0669e-69	-0.788256	-1	-0.46156	2.04845e-05	0.0243631	20116_2:50:17:37
20116_2	20002_1223	Smoking status: Current	Type 2 diabetes	3	150	0.000243494	0.00017576	0.00130751	0.00146103	-1	-1	-0.50483	5.45625e-05	0.0486463	20116_2:20002_1223:3:150
2040	21001	Risk taking	Body mass index (BMI)	1	32	0.000658095	0.000430774	7.79219e-09	3.10754e-06	0.764179	0.43803	1	4.64546e-05	0.0433204	2040:21001:1:32
2040	23105	Risk taking	Basal metabolic rate	3	160	0.000517176	0.000238587	1.84831e-05	0.00658056	1	0.52363	1	4.79746e-05	0.0441296	2040:23105:3:160
2040	50	Risk taking	Standing height	9	111	0.000754405	0.000262348	1.20664e-09	0.00280831	1	0.61273	1	3.74582e-07	0.00112364	2040:50:9:111
2040	50	Risk taking	Standing height	11	116	0.000565789	0.000221114	1.22515e-06	0.00910378	-1	-1	-0.54086	3.45667e-05	0.0355793	2040:50:11:116
2040	924	Risk taking	Usual walking pace	6	3	0.000665193	0.000556262	8.66748e-07	2.33127e-06	0.875692	0.55175	1	5.17175e-06	0.008998	2040:924:6:3
2040	I9_CHD	Risk taking	Major coronary heart disease event	6	96	0.000557832	0.000303368	9.6983e-07	0.00900071	-1	-1	-0.53506	5.10927e-06	0.00891477	2040:I9_CHD:6:96
2040	20002_1223	Risk taking	Type 2 diabetes	20	33	0.000280441	0.00032763	0.000349525	0.000356175	1	0.5601	1	3.95795e-05	0.0387759	2040:20002_1223:20:33
20458	23105	General happiness	Basal metabolic rate	16	32	0.000856695	0.000892526	0.00299793	1.33543e-10	0.949798	0.5603	1	1.3861e-05	0.0186165	20458:23105:16:32
20458	II_NEOPLASM	General happiness	Neoplasms	3	64	0.000625318	0.000565109	0.0184229	5.96948e-06	1	0.4934	1	5.67738e-05	0.0498156	20458:II_NEOPLASM:3:64
20458	20002_1286	General happiness	Depression	8	36	0.00136518	0.000339604	1.46335e-05	0.0010299	1	0.57868	1	2.7774e-05	0.0303641	20458:20002_1286:8:36
21001	2139	Body mass index (BMI)	Age first had sexual intercourse	1	195	0.000565326	0.000786892	6.00384e-08	1.32364e-08	-1	-1	-0.72158	5.93689e-10	3.61523e-06	21001:2139:1:195
21001	2139	Body mass index (BMI)	Age first had sexual intercourse	2	100	0.000382589	0.00054516	1.39025e-05	3.48826e-06	-0.898818	-1	-0.54997	3.11617e-05	0.0327167	21001:2139:2:100
21001	2139	Body mass index (BMI)	Age first had sexual intercourse	2	150	0.000543506	0.000831584	1.87934e-08	2.2313e-10	-0.698796	-1	-0.41937	2.74749e-05	0.0301997	21001:2139:2:150
21001	2139	Body mass index (BMI)	Age first had sexual intercourse	3	44	0.000849263	0.00049098	4.28377e-21	1.68264e-07	-1	-1	-0.79749	2.44136e-11	1.95612e-07	21001:2139:3:44
21001	2139	Body mass index (BMI)	Age first had sexual intercourse	3	46	0.00071521	0.000932756	2.16915e-11	2.65157e-11	-0.773339	-1	-0.52832	2.61596e-07	0.000856436	21001:2139:3:46
21001	2139	Body mass index (BMI)	Age first had sexual intercourse	3	76	0.000289822	0.000512013	3.38725e-06	7.9602e-09	-0.932567	-1	-0.63012	1.14378e-05	0.0161226	21001:2139:3:76
21001	2139	Body mass index (BMI)	Age first had sexual intercourse	5	141	0.00139025	0.00174745	5.80834e-23	1.34855e-21	-0.460176	-0.66006	-0.26366	9.93976e-06	0.0146911	21001:2139:5:141
21001	2139	Body mass index (BMI)	Age first had sexual intercourse	6	13	0.000753202	0.000636273	1.0798e-10	6.19746e-06	-0.735972	-1	-0.41691	3.01193e-05	0.0320086	21001:2139:6:13
21001	2139	Body mass index (BMI)	Age first had sexual intercourse	8	17	0.000254695	0.000582255	0.00107025	4.37206e-07	-1	-1	-0.61987	8.63143e-06	0.0131074	21001:2139:8:17
21001	2139	Body mass index (BMI)	Age first had sexual intercourse	8	18	0.00063893	0.000484699	2.29114e-09	0.000118248	-0.904144	-1	-0.55505	6.36605e-06	0.010449	21001:2139:8:18
21001	2139	Body mass index (BMI)	Age first had sexual intercourse	8	19	0.000600416	0.000343808	1.73437e-08	0.00366423	-0.98355	-1	-0.57789	3.02012e-05	0.0320397	21001:2139:8:19
21001	2139	Body mass index (BMI)	Age first had sexual intercourse	9	12	0.000822875	0.00112572	2.05441e-11	4.10737e-12	-0.570891	-0.85489	-0.30672	5.55527e-05	0.0490979	21001:2139:9:12
21001	2139	Body mass index (BMI)	Age first had sexual intercourse	11	31	0.000758868	0.000600669	5.23945e-15	9.91914e-08	-0.740579	-1	-0.47016	5.58924e-06	0.00948058	21001:2139:11:31
21001	2139	Body mass index (BMI)	Age first had sexual intercourse	11	129	0.000541245	0.000540688	1.46724e-07	2.40857e-05	-0.842042	-1	-0.48482	2.9318e-05	0.0314313	21001:2139:11:129
21001	2139	Body mass index (BMI)	Age first had sexual intercourse	14	67	0.000687744	0.000966919	5.00952e-09	6.17891e-10	-0.683424	-1	-0.40959	1.58791e-05	0.0206172	21001:2139:14:67
21001	2139	Body mass index (BMI)	Age first had sexual intercourse	15	45	0.00049995	0.00037718	1.28101e-09	6.81329e-05	-0.895124	-1	-0.57013	2.06688e-05	0.0245343	21001:2139:15:45
21001	2149	Body mass index (BMI)	Lifetime number of sexual partners	16	34	0.00448255	0.00102252	9.11038e-118	3.61576e-09	-0.441131	-0.64904	-0.25023	9.85876e-06	0.0146069	21001:2149:16:34
21001	2149	Body mass index (BMI)	Lifetime number of sexual partners	16	49	0.000374654	0.00073205	9.74474e-06	1.32582e-08	0.875329	0.56315	1	1.05358e-05	0.0152755	21001:2149:16:49
21001	22501	Body mass index (BMI)	Year ended full time education	11	31	0.000758868	0.000691216	5.23945e-15	0.024834	-1	-1	-0.56649	2.88892e-05	0.0311411	21001:22501:11:31
21001	23105	Body mass index (BMI)	Basal metabolic rate	1	32	0.000513522	0.00089027	8.88808e-08	5.31335e-13	0.827466	0.55927	1	3.98032e-07	0.0011766	21001:23105:1:32
21001	23105	Body mass index (BMI)	Basal metabolic rate	1	60	0.000346189	0.000495919	9.19972e-05	5.17738e-06	1	0.63121	1	9.20817e-06	0.013811	21001:23105:1:60
21001	23105	Body mass index (BMI)	Basal metabolic rate	1	62	0.000179805	0.0006398	0.000986842	2.61614e-13	1	0.68608	1	4.76728e-07	0.00135023	21001:23105:1:62
21001	23105	Body mass index (BMI)	Basal metabolic rate	1	67	0.000544377	0.00106503	1.15071e-10	1.30581e-20	0.934482	0.74024	1	9.05334e-11	6.19435e-07	21001:23105:1:67
21001	23105	Body mass index (BMI)	Basal metabolic rate	1	84	0.00069552	0.000814525	1.1996e-12	1.68924e-12	0.810635	0.58115	1	4.10951e-08	0.000163709	21001:23105:1:84
21001	23105	Body mass index (BMI)	Basal metabolic rate	1	85	0.000628145	0.000430668	2.44168e-10	3.77251e-05	1	0.69908	1	1.52898e-07	0.000544481	21001:23105:1:85
21001	23105	Body mass index (BMI)	Basal metabolic rate	1	134	0.00141375	0.00103239	6.70768e-34	7.32422e-18	0.908075	0.76495	1	2.67318e-16	4.6509e-12	21001:23105:1:134
21001	23105	Body mass index (BMI)	Basal metabolic rate	1	145	0.000300067	0.000239299	3.32104e-05	0.00208538	1	0.55705	1	1.55978e-05	0.0203387	21001:23105:1:145
21001	23105	Body mass index (BMI)	Basal metabolic rate	2	1	0.00189361	0.00188598	1.80603e-50	1.60368e-40	0.920869	0.82554	1	7.69298e-29	4.68459e-24	21001:23105:2:1
21001	23105	Body mass index (BMI)	Basal metabolic rate	2	183	0.00100266	0.000918564	2.96311e-14	6.24751e-10	0.704172	0.45805	0.99493	5.30366e-07	0.00146137	21001:23105:2:183
21001	23105	Body mass index (BMI)	Basal metabolic rate	2	185	0.000290889	0.000522379	0.000462984	1.10659e-06	1	0.622	1	1.02986e-06	0.002469	21001:23105:2:185
21001	23105	Body mass index (BMI)	Basal metabolic rate	3	44	0.000849263	0.000662228	4.28377e-21	2.01364e-12	0.628875	0.39444	0.86734	5.91309e-06	0.00989213	21001:23105:3:44
21001	23105	Body mass index (BMI)	Basal metabolic rate	3	58	0.000689623	0.000552437	1.17962e-09	8.96434e-06	0.788508	0.46945	1	1.53161e-05	0.0200573	21001:23105:3:58
21001	23105	Body mass index (BMI)	Basal metabolic rate	3	62	0.000468967	0.000482862	1.32569e-06	1.47672e-05	0.889232	0.54254	1	1.99552e-05	0.0241103	21001:23105:3:62
21001	23105	Body mass index (BMI)	Basal metabolic rate	3	75	0.000349315	0.000426072	5.95731e-07	3.17767e-07	1	0.70665	1	5.82133e-07	0.00157549	21001:23105:3:75
21001	23105	Body mass index (BMI)	Basal metabolic rate	3	76	0.000289822	0.000503967	3.38725e-06	7.86182e-10	0.925276	0.64107	1	7.5756e-06	0.0119202	21001:23105:3:76
21001	23105	Body mass index (BMI)	Basal metabolic rate	3	151	0.000437059	0.000437664	1.03581e-06	1.80582e-05	1	0.66808	1	3.16208e-06	0.0062066	21001:23105:3:151
21001	23105	Body mass index (BMI)	Basal metabolic rate	4	50	0.000618106	0.00056268	3.87094e-12	1.17859e-08	1	0.77996	1	3.08061e-09	1.65807e-05	21001:23105:4:50
21001	23105	Body mass index (BMI)	Basal metabolic rate	5	63	0.000507256	0.000372481	3.35738e-11	2.97866e-06	1	0.74619	1	3.64791e-09	1.88252e-05	21001:23105:5:63
21001	23105	Body mass index (BMI)	Basal metabolic rate	5	80	0.00044655	0.000730364	3.93096e-06	2.2147e-09	1	0.71549	1	6.61152e-09	3.16423e-05	21001:23105:5:80
21001	23105	Body mass index (BMI)	Basal metabolic rate	5	95	0.000483062	0.000238046	3.12744e-08	0.00489746	1	0.59215	1	5.07329e-05	0.0459724	21001:23105:5:95
21001	23105	Body mass index (BMI)	Basal metabolic rate	5	105	0.000457846	0.00104405	2.48017e-07	1.49755e-17	0.662855	0.39358	0.97555	2.51875e-05	0.0281695	21001:23105:5:105
21001	23105	Body mass index (BMI)	Basal metabolic rate	5	141	0.00139025	0.00136708	5.80834e-23	1.29288e-17	0.605008	0.41584	0.80752	3.94191e-08	0.000160027	21001:23105:5:141
21001	23105	Body mass index (BMI)	Basal metabolic rate	6	29	0.00105759	0.00275508	8.11772e-24	4.02153e-66	0.482263	0.31975	0.64514	9.66843e-08	0.000352546	21001:23105:6:29
21001	23105	Body mass index (BMI)	Basal metabolic rate	6	43	0.000860683	0.0010434	1.38894e-18	3.14586e-19	0.894592	0.72206	1	1.02462e-12	1.11417e-08	21001:23105:6:43
21001	23105	Body mass index (BMI)	Basal metabolic rate	6	44	0.000829885	0.000669083	2.72638e-18	4.34534e-11	0.955997	0.77191	1	7.8912e-11	5.58755e-07	21001:23105:6:44
21001	23105	Body mass index (BMI)	Basal metabolic rate	6	97	0.000813541	0.00105318	1.09802e-12	2.05928e-14	0.618418	0.37333	0.87988	5.01954e-06	0.00878337	21001:23105:6:97
21001	23105	Body mass index (BMI)	Basal metabolic rate	7	32	0.000584604	0.000721007	7.5231e-08	2.57892e-08	0.718096	0.40622	1	3.80691e-05	0.0379996	21001:23105:7:32
21001	23105	Body mass index (BMI)	Basal metabolic rate	7	75	0.000513799	0.000750382	8.97386e-09	1.34751e-11	0.748958	0.47826	1	6.31052e-06	0.0103858	21001:23105:7:75
21001	23105	Body mass index (BMI)	Basal metabolic rate	8	80	0.000556179	0.000235576	1.05196e-11	0.00165932	1	0.65617	1	1.01618e-06	0.0024485	21001:23105:8:80
21001	23105	Body mass index (BMI)	Basal metabolic rate	8	136	0.000485217	0.000725169	3.40205e-07	8.32743e-10	1	0.73349	1	2.04172e-08	8.93646e-05	21001:23105:8:136
21001	23105	Body mass index (BMI)	Basal metabolic rate	8	137	0.000403444	0.000774743	1.18719e-05	1.25517e-10	0.924779	0.63243	1	7.20713e-07	0.00186755	21001:23105:8:137
21001	23105	Body mass index (BMI)	Basal metabolic rate	9	77	0.000389191	0.0004678	8.27349e-06	6.2182e-06	1	0.65951	1	2.16433e-06	0.00451354	21001:23105:9:77
21001	23105	Body mass index (BMI)	Basal metabolic rate	10	38	0.00107134	0.00104826	2.36569e-18	4.45975e-14	0.616192	0.39965	0.85276	7.94951e-07	0.00202544	21001:23105:10:38
21001	23105	Body mass index (BMI)	Basal metabolic rate	10	96	0.000396153	0.000904361	1.20208e-05	2.14133e-13	0.80148	0.50767	1	6.6233e-06	0.010784	21001:23105:10:96
21001	23105	Body mass index (BMI)	Basal metabolic rate	10	124	0.000806537	0.0002727	4.36355e-13	0.0072256	0.956483	0.56223	1	2.45996e-05	0.0278953	21001:23105:10:124
21001	23105	Body mass index (BMI)	Basal metabolic rate	11	31	0.000758868	0.0013564	5.23945e-15	4.46377e-26	1	0.85177	1	1.18562e-18	2.8879e-14	21001:23105:11:31
21001	23105	Body mass index (BMI)	Basal metabolic rate	11	32	0.000662985	0.000651522	4.01091e-14	4.00311e-11	0.810075	0.5794	1	1.46961e-07	0.000526417	21001:23105:11:32
21001	23105	Body mass index (BMI)	Basal metabolic rate	12	1	0.000566791	0.00127401	2.1859e-08	3.03824e-20	0.589501	0.32887	0.8708	3.43627e-05	0.035466	21001:23105:12:1
21001	23105	Body mass index (BMI)	Basal metabolic rate	12	3	0.000685446	0.000582291	5.62185e-10	1.98067e-06	0.723476	0.40982	1	4.15691e-05	0.040116	21001:23105:12:3
21001	23105	Body mass index (BMI)	Basal metabolic rate	12	17	0.000850248	0.000615207	2.45222e-15	6.40316e-08	0.802696	0.55127	1	2.69373e-07	0.000877181	21001:23105:12:17
21001	23105	Body mass index (BMI)	Basal metabolic rate	12	49	0.000515371	0.00101096	1.38721e-08	6.99808e-17	1	0.78641	1	4.65405e-11	3.37387e-07	21001:23105:12:49
21001	23105	Body mass index (BMI)	Basal metabolic rate	12	89	0.000519118	0.000873345	2.96765e-08	3.13482e-13	0.650898	0.36911	0.96557	4.48867e-05	0.0424432	21001:23105:12:89
21001	23105	Body mass index (BMI)	Basal metabolic rate	12	111	0.000362499	0.00140775	7.67314e-06	1.23326e-27	0.790293	0.53354	1	7.00635e-07	0.00182328	21001:23105:12:111
21001	23105	Body mass index (BMI)	Basal metabolic rate	13	33	0.0007419	0.000787308	8.56261e-12	3.49587e-10	0.954225	0.72952	1	5.61308e-10	3.45257e-06	21001:23105:13:33
21001	23105	Body mass index (BMI)	Basal metabolic rate	14	10	0.000837878	0.000543267	2.09948e-13	5.43865e-06	0.794356	0.50808	1	3.27189e-06	0.00634521	21001:23105:14:10
21001	23105	Body mass index (BMI)	Basal metabolic rate	16	3	0.000649656	0.00153396	1.78428e-09	8.02752e-25	0.544692	0.30574	0.80139	2.90508e-05	0.0312549	21001:23105:16:3
21001	23105	Body mass index (BMI)	Basal metabolic rate	16	4	0.0013078	0.00168082	1.63156e-23	1.74419e-26	0.614625	0.44013	0.80014	1.92857e-09	1.0874e-05	21001:23105:16:4
21001	23105	Body mass index (BMI)	Basal metabolic rate	16	20	0.000574082	0.00113982	3.32975e-08	9.96515e-17	0.616206	0.35124	0.91524	3.16429e-05	0.0331078	21001:23105:16:20
21001	23105	Body mass index (BMI)	Basal metabolic rate	16	23	0.000808319	0.000703134	4.95541e-12	6.62961e-08	0.669614	0.38355	0.99241	2.36304e-05	0.0271006	21001:23105:16:23
21001	23105	Body mass index (BMI)	Basal metabolic rate	16	26	0.000498975	0.000708791	7.07662e-08	4.88606e-10	0.833946	0.55351	1	1.66133e-06	0.00365219	21001:23105:16:26
21001	23105	Body mass index (BMI)	Basal metabolic rate	16	27	0.00113653	0.00135505	9.62001e-25	4.76071e-25	0.641188	0.46201	0.81711	2.48702e-09	1.36437e-05	21001:23105:16:27
21001	23105	Body mass index (BMI)	Basal metabolic rate	16	34	0.00448255	0.00498101	9.11038e-118	9.87163e-109	0.910048	0.84829	0.96938	1.55603e-80	9.47534e-75	21001:23105:16:34
21001	23105	Body mass index (BMI)	Basal metabolic rate	17	29	0.000680036	0.0003283	2.3837e-10	0.00193253	0.915251	0.53543	1	2.99324e-05	0.0318656	21001:23105:17:29
21001	23105	Body mass index (BMI)	Basal metabolic rate	17	56	0.0002914	0.000567889	0.00322849	1.05253e-05	1	0.55694	1	2.21961e-06	0.00458175	21001:23105:17:56
21001	23105	Body mass index (BMI)	Basal metabolic rate	17	63	0.000662546	0.000430817	5.195e-11	4.15928e-05	0.974198	0.67511	1	4.08548e-07	0.00120185	21001:23105:17:63
21001	23105	Body mass index (BMI)	Basal metabolic rate	18	44	0.000546677	0.000369337	1.13404e-08	0.000241235	1	0.66183	1	4.72868e-08	0.000184583	21001:23105:18:44
21001	23105	Body mass index (BMI)	Basal metabolic rate	18	49	0.00252634	0.00320572	3.65104e-75	4.93706e-82	0.972814	0.91565	1	3.16367e-54	6.42165e-49	21001:23105:18:49
21001	23105	Body mass index (BMI)	Basal metabolic rate	19	31	0.000459819	0.000297201	2.17618e-06	0.00332138	1	0.57275	1	2.07145e-06	0.00434964	21001:23105:19:31
21001	23105	Body mass index (BMI)	Basal metabolic rate	19	47	0.000483109	0.000447083	6.18809e-08	7.74984e-06	0.889743	0.55724	1	1.03313e-05	0.0150867	21001:23105:19:47
21001	23105	Body mass index (BMI)	Basal metabolic rate	19	48	0.000571166	0.000952344	6.58211e-09	3.38634e-14	0.768125	0.5083	1	5.35989e-07	0.00147021	21001:23105:19:48
21001	23105	Body mass index (BMI)	Basal metabolic rate	22	22	0.000389778	0.00074554	8.02748e-05	6.03959e-09	0.882051	0.53755	1	8.8857e-06	0.0134599	21001:23105:22:22
21001	3526	Body mass index (BMI)	Mother's age at death	17	29	0.000680036	0.000889373	2.3837e-10	4.11985e-06	-0.822165	-1	-0.51454	4.88831e-06	0.00862812	21001:3526:17:29
21001	50	Body mass index (BMI)	Standing height	2	28	0.00140361	0.00189289	5.43968e-34	2.75471e-41	-0.404928	-0.56645	-0.23928	7.81879e-06	0.012177	21001:50:2:28
21001	50	Body mass index (BMI)	Standing height	2	208	0.000307339	0.00393326	0.000517704	1.89962e-94	-0.754408	-1	-0.50001	3.10207e-07	0.000978748	21001:50:2:208
21001	50	Body mass index (BMI)	Standing height	3	44	0.000849263	0.0010678	4.28377e-21	2.5391e-23	-0.557589	-0.76075	-0.35316	3.23762e-06	0.00629881	21001:50:3:44
21001	50	Body mass index (BMI)	Standing height	3	46	0.00071521	0.00201366	2.16915e-11	1.33032e-38	-0.472793	-0.6924	-0.26164	4.40357e-05	0.041916	21001:50:3:46
21001	50	Body mass index (BMI)	Standing height	3	120	0.000374609	0.000414146	4.43358e-06	1.00612e-05	-1	-1	-0.6633	2.40861e-06	0.00495509	21001:50:3:120
21001	50	Body mass index (BMI)	Standing height	4	22	0.000449282	0.00392113	4.72798e-07	9.24982e-100	-0.552534	-0.8053	-0.33781	5.68197e-06	0.00958027	21001:50:4:22
21001	50	Body mass index (BMI)	Standing height	5	91	0.000435408	0.00114191	8.23898e-07	4.38771e-20	-0.66442	-0.97976	-0.39003	2.01862e-05	0.0241658	21001:50:5:91
21001	50	Body mass index (BMI)	Standing height	6	7	0.000574216	0.00370953	7.5244e-07	6.46822e-76	-0.543387	-0.79603	-0.32853	3.10659e-06	0.00612711	21001:50:6:7
21001	50	Body mass index (BMI)	Standing height	6	130	0.000396776	0.000583393	0.000236514	8.36537e-06	-0.926155	-1	-0.53377	4.04285e-05	0.0391394	21001:50:6:130
21001	50	Body mass index (BMI)	Standing height	9	61	0.000563112	0.000688075	2.15398e-07	6.61515e-08	-0.811689	-1	-0.50455	6.55539e-06	0.010702	21001:50:9:61
21001	50	Body mass index (BMI)	Standing height	9	72	0.000414373	0.000567806	1.93768e-07	3.62222e-09	-0.878124	-1	-0.59255	2.71936e-06	0.00548323	21001:50:9:72
21001	50	Body mass index (BMI)	Standing height	10	88	0.00041725	0.00070026	2.29754e-07	8.19765e-12	-0.819209	-1	-0.54083	3.44789e-06	0.00654071	21001:50:10:88
21001	50	Body mass index (BMI)	Standing height	11	73	0.000443541	0.000590752	2.18129e-06	1.30404e-07	-0.856611	-1	-0.53586	1.02734e-05	0.0150383	21001:50:11:73
21001	50	Body mass index (BMI)	Standing height	12	15	0.000677044	0.000654767	3.28443e-10	5.65242e-08	-0.772348	-1	-0.488	4.01704e-06	0.00730194	21001:50:12:15
21001	50	Body mass index (BMI)	Standing height	15	42	0.00058021	0.00165904	1.45488e-10	6.56982e-35	-0.733485	-0.95209	-0.52853	1.01449e-08	4.68005e-05	21001:50:15:42
21001	50	Body mass index (BMI)	Standing height	15	56	0.00056732	0.00392177	3.88044e-08	1.20444e-91	-0.609498	-0.8446	-0.41223	6.88003e-08	0.000258614	21001:50:15:56
21001	50	Body mass index (BMI)	Standing height	16	47	0.00061323	0.000791874	6.32155e-13	8.00218e-15	-0.662958	-0.91846	-0.42007	5.93142e-06	0.00989561	21001:50:16:47
21001	50	Body mass index (BMI)	Standing height	17	21	0.00032908	0.00119548	8.43212e-06	7.01004e-25	-0.839835	-1	-0.59062	5.1225e-07	0.00141787	21001:50:17:21
21001	50	Body mass index (BMI)	Standing height	17	46	0.000227947	0.00255379	0.00502297	4.35385e-55	-0.786362	-1	-0.46963	1.01785e-05	0.0149352	21001:50:17:46
21001	50	Body mass index (BMI)	Standing height	18	49	0.00252634	0.000491926	3.65104e-75	1.5094e-07	0.75744	0.54835	0.99806	3.95469e-09	2.02368e-05	21001:50:18:49
21001	50	Body mass index (BMI)	Standing height	19	22	0.000795672	0.000994775	2.11953e-16	4.42811e-18	-0.84869	-1	-0.6571	8.17374e-11	5.65607e-07	21001:50:19:22
21001	50	Body mass index (BMI)	Standing height	19	23	0.000170973	0.00069604	0.00397514	2.50422e-13	-0.982753	-1	-0.62599	3.92396e-05	0.0385398	21001:50:19:23
21001	50	Body mass index (BMI)	Standing height	20	8	0.000452678	0.00392077	6.14315e-06	1.90154e-90	-0.563727	-0.84541	-0.33979	6.05352e-06	0.0100443	21001:50:20:8
21001	924	Body mass index (BMI)	Usual walking pace	1	195	0.000565326	0.000467502	6.00384e-08	3.96988e-05	-0.971555	-1	-0.64506	1.73752e-06	0.0037653	21001:924:1:195
21001	924	Body mass index (BMI)	Usual walking pace	2	9	0.000411693	0.000485342	1.12365e-05	9.44139e-06	-0.934765	-1	-0.57885	1.60993e-05	0.0208463	21001:924:2:9
21001	924	Body mass index (BMI)	Usual walking pace	2	57	0.000456239	0.000391745	4.02867e-07	6.84482e-05	-1	-1	-0.65278	4.46743e-06	0.00802481	21001:924:2:57
21001	924	Body mass index (BMI)	Usual walking pace	3	11	0.000781803	0.000695577	5.91187e-10	7.14969e-07	-0.810496	-1	-0.52288	1.54813e-06	0.0034532	21001:924:3:11
21001	924	Body mass index (BMI)	Usual walking pace	3	44	0.000849263	0.000416038	4.28377e-21	4.5027e-07	-0.907013	-1	-0.67863	5.28911e-08	0.000203846	21001:924:3:44
21001	924	Body mass index (BMI)	Usual walking pace	4	97	0.000651888	0.000411623	1.23826e-10	7.50326e-05	-0.875574	-1	-0.54686	7.97212e-06	0.0123526	21001:924:4:97
21001	924	Body mass index (BMI)	Usual walking pace	6	87	0.000502209	0.00037831	2.93581e-08	8.25901e-05	-0.938719	-1	-0.59713	9.63946e-06	0.0143168	21001:924:6:87
21001	924	Body mass index (BMI)	Usual walking pace	7	28	0.000237582	0.000361121	0.00368241	0.000356918	-1	-1	-0.49308	3.03449e-05	0.0321362	21001:924:7:28
21001	924	Body mass index (BMI)	Usual walking pace	11	49	0.000418579	0.000361512	3.4612e-09	2.13364e-06	-1	-1	-0.72295	6.36509e-08	0.000240744	21001:924:11:49
21001	924	Body mass index (BMI)	Usual walking pace	12	111	0.000362499	0.000308346	7.67314e-06	0.000463239	-1	-1	-0.60966	2.00969e-05	0.0241658	21001:924:12:111
21001	924	Body mass index (BMI)	Usual walking pace	14	10	0.000837878	0.000553209	2.09948e-13	3.12464e-06	-0.853179	-1	-0.57644	4.15299e-07	0.00121002	21001:924:14:10
21001	924	Body mass index (BMI)	Usual walking pace	16	4	0.0013078	0.000664731	1.63156e-23	2.17735e-07	-0.646507	-0.93322	-0.39775	3.60458e-06	0.00673415	21001:924:16:4
21001	924	Body mass index (BMI)	Usual walking pace	16	23	0.000808319	0.000440044	4.95541e-12	0.000189582	-0.788353	-1	-0.46107	3.0478e-05	0.0322211	21001:924:16:23
21001	924	Body mass index (BMI)	Usual walking pace	16	26	0.000498975	0.000286251	7.07662e-08	0.00202213	-1	-1	-0.60582	1.72551e-06	0.00375263	21001:924:16:26
21001	924	Body mass index (BMI)	Usual walking pace	16	34	0.00448255	0.00106233	9.11038e-118	9.84579e-13	-0.469278	-0.64421	-0.30195	2.10157e-07	0.000718953	21001:924:16:34
21001	924	Body mass index (BMI)	Usual walking pace	19	21	0.000556534	0.000421688	1.01301e-08	4.68335e-05	-0.821304	-1	-0.48281	4.75214e-05	0.0439117	21001:924:19:21
21001	924	Body mass index (BMI)	Usual walking pace	19	31	0.000459819	0.000423977	2.17618e-06	8.68618e-05	-1	-1	-0.63837	4.91687e-07	0.00137344	21001:924:19:31
21001	20002_1223	Body mass index (BMI)	Type 2 diabetes	16	34	0.00448255	0.000536372	9.11038e-118	5.07119e-10	0.485051	0.30404	0.68671	6.87614e-07	0.00180548	21001:20002_1223:16:34
21001	20002_1223	Body mass index (BMI)	Type 2 diabetes	22	33	0.000365005	0.000858342	0.000216761	2.76928e-14	-0.742305	-1	-0.40818	5.42439e-05	0.0485587	21001:20002_1223:22:33
21001	20002_1291	Body mass index (BMI)	Mania/Bipolar disorder	2	9	0.000411693	0.000299788	1.12365e-05	6.33802e-05	0.932932	0.54053	1	3.74824e-05	0.0375405	21001:20002_1291:2:9
2139	2149	Age first had sexual intercourse	Lifetime number of sexual partners	1	50	0.000625294	0.000476508	5.61279e-09	7.54739e-05	-1	-1	-0.68415	3.06722e-07	0.000972793	2139:2149:1:50
2139	2149	Age first had sexual intercourse	Lifetime number of sexual partners	1	160	0.000454029	0.000701646	0.000302432	1.64139e-05	-0.932949	-1	-0.5251	4.92908e-05	0.0449331	2139:2149:1:160
2139	2149	Age first had sexual intercourse	Lifetime number of sexual partners	2	49	0.000806191	0.000306193	1.46191e-11	0.00809685	-1	-1	-0.58861	1.11857e-06	0.00266072	2139:2149:2:49
2139	2149	Age first had sexual intercourse	Lifetime number of sexual partners	2	67	0.0015102	0.000491026	2.5042e-23	0.000696622	-0.777188	-1	-0.47297	8.29789e-06	0.0127046	2139:2149:2:67
2139	2149	Age first had sexual intercourse	Lifetime number of sexual partners	6	146	0.00117879	0.000864867	1.78757e-15	2.22064e-07	-0.675106	-0.99801	-0.4071	6.89886e-06	0.0111729	2139:2149:6:146
2139	22501	Age first had sexual intercourse	Year ended full time education	2	14	0.000182135	0.00300807	0.0306445	2.41524e-10	1	0.51884	1	2.49673e-05	0.0281029	2139:22501:2:14
2139	22501	Age first had sexual intercourse	Year ended full time education	3	21	0.000339328	0.00174131	0.00156485	0.000169467	1	0.53295	1	1.42391e-05	0.0189319	2139:22501:3:21
2139	23105	Age first had sexual intercourse	Basal metabolic rate	1	26	0.000586905	0.000753023	2.02975e-06	1.68106e-08	0.8465	0.53564	1	3.61621e-06	0.00673415	2139:23105:1:26
2139	23105	Age first had sexual intercourse	Basal metabolic rate	2	1	0.00037404	0.00188598	3.38631e-05	1.60368e-40	-0.6466	-1	-0.38422	2.88939e-05	0.0311411	2139:23105:2:1
2139	23105	Age first had sexual intercourse	Basal metabolic rate	3	44	0.00050466	0.000662228	3.02224e-09	2.01364e-12	-0.74225	-1	-0.46988	1.08186e-05	0.0155743	2139:23105:3:44
2139	23105	Age first had sexual intercourse	Basal metabolic rate	11	31	0.000264996	0.0013564	0.00162116	4.46377e-26	-0.863716	-1	-0.55023	7.7419e-06	0.0121121	2139:23105:11:31
2139	23105	Age first had sexual intercourse	Basal metabolic rate	11	32	0.000416696	0.000651522	1.21758e-06	4.00311e-11	-0.791901	-1	-0.48837	1.92798e-05	0.0234337	2139:23105:11:32
2139	23105	Age first had sexual intercourse	Basal metabolic rate	20	30	0.000534893	0.00162678	1.19203e-06	1.16066e-28	-0.602662	-0.90499	-0.34621	2.60243e-05	0.0290244	2139:23105:20:30
2139	50	Age first had sexual intercourse	Standing height	2	49	0.000806191	0.00112059	1.46191e-11	1.13019e-17	0.764632	0.5408	1	2.05455e-08	8.93646e-05	2139:50:2:49
2139	50	Age first had sexual intercourse	Standing height	2	67	0.0015102	0.000554952	2.5042e-23	1.07914e-05	0.773042	0.50729	1	3.30604e-07	0.00102192	2139:50:2:67
2139	50	Age first had sexual intercourse	Standing height	3	46	0.000749045	0.00201366	3.58957e-10	1.33032e-38	0.532716	0.32267	0.76606	9.39863e-06	0.0139932	2139:50:3:46
2139	50	Age first had sexual intercourse	Standing height	4	22	0.00031692	0.00392113	0.000540218	9.24982e-100	0.623091	0.35656	1	5.01409e-05	0.0456397	2139:50:4:22
2139	50	Age first had sexual intercourse	Standing height	14	67	0.000338932	0.00221017	0.00300915	4.11703e-38	0.787109	0.48193	1	4.67625e-06	0.00832623	2139:50:14:67
2139	50	Age first had sexual intercourse	Standing height	16	1	0.000396197	0.00233665	0.000161769	3.54872e-47	0.640155	0.36815	1	2.79658e-05	0.0304064	2139:50:16:1
2139	50	Age first had sexual intercourse	Standing height	17	21	0.000309477	0.00119548	0.000118415	7.01004e-25	0.757153	0.46304	1	2.30467e-05	0.0268853	2139:50:17:21
2139	50	Age first had sexual intercourse	Standing height	17	34	0.000167292	0.00105294	0.0238776	3.26601e-19	1	0.58824	1	1.52554e-06	0.00341532	2139:50:17:34
2139	50	Age first had sexual intercourse	Standing height	17	37	0.000345679	0.00308478	0.000524852	1.0669e-69	0.843378	0.58773	1	9.47886e-08	0.000349823	2139:50:17:37
2139	50	Age first had sexual intercourse	Standing height	20	23	0.000383241	0.00136703	0.000339924	6.42393e-22	-0.735641	-1	-0.42519	2.20274e-05	0.0258448	2139:50:20:23
2139	50	Age first had sexual intercourse	Standing height	20	30	0.000534893	0.00213866	1.19203e-06	1.64214e-42	-0.593405	-0.88391	-0.3537	1.13922e-05	0.0161134	2139:50:20:30
2139	924	Age first had sexual intercourse	Usual walking pace	2	67	0.0015102	0.0011683	2.5042e-23	1.25337e-15	0.523815	0.32497	0.73696	4.36778e-06	0.00786902	2139:924:2:67
2139	924	Age first had sexual intercourse	Usual walking pace	3	4	0.000475557	0.0010727	0.000350218	7.18203e-12	0.902479	0.57409	1	1.61167e-06	0.00356099	2139:924:3:4
2139	924	Age first had sexual intercourse	Usual walking pace	3	44	0.00050466	0.000416038	3.02224e-09	4.5027e-07	1	0.74218	1	1.11582e-08	5.07068e-05	2139:924:3:44
2139	924	Age first had sexual intercourse	Usual walking pace	11	128	0.000726311	0.000757469	6.84871e-08	4.43808e-08	0.857903	0.56629	1	6.70549e-07	0.00177533	2139:924:11:128
2139	I9_CHD	Age first had sexual intercourse	Major coronary heart disease event	9	20	0.000975465	0.000210002	2.02437e-12	0.0159478	-1	-1	-0.58315	2.33896e-05	0.0269857	2139:I9_CHD:9:20
2139	I9_CHD	Age first had sexual intercourse	Major coronary heart disease event	12	51	0.000261971	0.000514144	0.0106487	1.64358e-06	-1	-1	-0.52641	5.69521e-06	0.00958027	2139:I9_CHD:12:51
2139	20002_1291	Age first had sexual intercourse	Mania/Bipolar disorder	12	112	0.000237781	0.000305778	0.0056869	8.4489e-10	0.982065	0.57389	1	5.30638e-05	0.0478	2139:20002_1291:12:112
2139	20002_1291	Age first had sexual intercourse	Mania/Bipolar disorder	16	8	0.000729568	0.000127364	1.73679e-08	3.65786e-05	-0.82406	-1	-0.48449	2.2247e-05	0.0260522	2139:20002_1291:16:8
2149	23105	Lifetime number of sexual partners	Basal metabolic rate	15	65	0.000272158	0.0024003	0.0161202	4.34434e-42	0.779217	0.42222	1	4.77865e-05	0.0440231	2149:23105:15:65
2149	3526	Lifetime number of sexual partners	Mother's age at death	13	51	0.000468841	0.000665317	0.000127013	0.000541561	-1	-1	-0.56296	3.31172e-05	0.0344138	2149:3526:13:51
2149	50	Lifetime number of sexual partners	Standing height	2	49	0.000486321	0.00112059	1.62611e-05	1.13019e-17	-0.685268	-1	-0.39455	3.98462e-05	0.0388066	2149:50:2:49
2149	20002_1223	Lifetime number of sexual partners	Type 2 diabetes	6	80	0.000460325	0.000354044	0.000164693	4.25487e-05	-0.974124	-1	-0.57267	3.41709e-05	0.0353279	2149:20002_1223:6:80
2207	3526	Wears glasses or contact lenses	Mother's age at death	4	7	0.000386192	0.000843798	0.000159853	5.94831e-05	-0.989372	-1	-0.58417	2.52115e-05	0.0281695	2207:3526:4:7
2207	50	Wears glasses or contact lenses	Standing height	5	120	0.000244845	0.000801761	0.00211892	6.81665e-12	1	0.64709	1	3.60777e-06	0.00673415	2207:50:5:120
2207	50	Wears glasses or contact lenses	Standing height	11	4	0.000129802	0.00285411	0.0632913	7.11497e-57	-1	-1	-0.55799	5.23438e-06	0.00903618	2207:50:11:4
22501	23105	Year ended full time education	Basal metabolic rate	8	43	0.000572545	0.00142543	1.34767e-06	9.30539e-05	-1	-1	-0.64898	4.29761e-06	0.00776558	22501:23105:8:43
22501	50	Year ended full time education	Standing height	2	195	0.00082515	0.000708948	7.98035e-13	0.0115646	1	0.60169	1	1.9741e-05	0.0238989	22501:50:2:195
22501	924	Year ended full time education	Usual walking pace	3	44	0.000416038	0.000969808	4.5027e-07	9.53561e-05	1	0.66995	1	2.08052e-07	0.000715773	22501:924:3:44
22501	924	Year ended full time education	Usual walking pace	11	129	0.000642535	0.00202238	9.73129e-08	2.57063e-07	0.765875	0.44485	1	2.8241e-05	0.0305999	22501:924:11:129
23105	3526	Basal metabolic rate	Mother's age at death	17	29	0.000416867	0.000889373	2.27641e-05	4.11985e-06	-0.956608	-1	-0.60465	8.23108e-06	0.0126572	23105:3526:17:29
23105	50	Basal metabolic rate	Standing height	1	23	0.000499892	0.000905083	2.07362e-08	2.18461e-15	0.689431	0.41988	0.98634	1.09575e-05	0.0156631	23105:50:1:23
23105	50	Basal metabolic rate	Standing height	1	24	0.000152719	0.000932132	0.0229584	4.37479e-16	1	0.58221	1	1.14724e-05	0.016134	23105:50:1:24
23105	50	Basal metabolic rate	Standing height	1	27	0.000478394	0.00172517	8.49192e-07	3.33597e-32	0.611659	0.3623	0.9002	1.28017e-05	0.0174055	23105:50:1:27
23105	50	Basal metabolic rate	Standing height	1	31	0.000431415	0.000658852	2.25843e-07	1.17124e-10	0.856043	0.57631	1	2.17923e-06	0.0045137	23105:50:1:31
23105	50	Basal metabolic rate	Standing height	1	35	0.000521673	0.00119352	8.42609e-07	1.58288e-17	0.7141	0.44816	1	3.36838e-06	0.00645263	23105:50:1:35
23105	50	Basal metabolic rate	Standing height	1	38	0.0006253	0.0017517	3.69894e-11	9.53758e-37	0.750575	0.55566	0.9648	1.77714e-09	1.01138e-05	23105:50:1:38
23105	50	Basal metabolic rate	Standing height	1	44	0.00048762	0.000818802	6.25775e-09	1.13273e-14	0.686158	0.42294	0.98204	1.52568e-05	0.0200227	23105:50:1:44
23105	50	Basal metabolic rate	Standing height	1	67	0.000853273	0.00061168	7.58899e-19	3.24884e-10	0.880282	0.66747	1	3.20211e-09	1.69557e-05	23105:50:1:67
23105	50	Basal metabolic rate	Standing height	1	109	0.000441814	0.00202196	1.1835e-08	2.64238e-50	0.569111	0.3383	0.81816	1.6124e-05	0.0208463	23105:50:1:109
23105	50	Basal metabolic rate	Standing height	1	113	0.00108112	0.0013992	4.01142e-18	1.66012e-21	0.487454	0.28065	0.70269	1.61675e-05	0.0208582	23105:50:1:113
23105	50	Basal metabolic rate	Standing height	1	119	0.000418624	0.000593566	3.44894e-05	8.78502e-07	0.995067	0.64948	1	2.15618e-06	0.004512	23105:50:1:119
23105	50	Basal metabolic rate	Standing height	1	129	0.000522635	0.0027729	4.94417e-08	9.79423e-63	0.871312	0.69006	1	1.65276e-12	1.70582e-08	23105:50:1:129
23105	50	Basal metabolic rate	Standing height	1	133	0.00112853	0.00197168	4.51343e-24	4.09045e-42	0.809968	0.67388	0.95542	1.97394e-16	3.53534e-12	23105:50:1:133
23105	50	Basal metabolic rate	Standing height	1	139	0.000368923	0.00142691	4.86072e-06	2.09246e-29	0.97348	0.75319	1	6.82102e-10	4.11249e-06	23105:50:1:139
23105	50	Basal metabolic rate	Standing height	1	162	0.000299882	0.000632903	0.000327058	6.4391e-09	0.890545	0.53305	1	3.8128e-05	0.0379996	23105:50:1:162
23105	50	Basal metabolic rate	Standing height	1	164	0.000606815	0.000757399	8.7759e-10	5.77748e-11	1	0.777	1	2.74559e-10	1.79775e-06	23105:50:1:164
23105	50	Basal metabolic rate	Standing height	1	169	0.000753969	0.00257605	1.45625e-12	2.11355e-55	0.965198	0.82325	1	1.43429e-18	3.35923e-14	23105:50:1:169
[truncated: 244 more rows]
